# Supplementary material for: Transcriptomic Changes Associated with ERBB2 Overexpression in Colorectal Cancer Implicate a Potential Role of the Wnt Signaling Pathway in Tumorigenesis
Source: MDPI journal article supplement (doi:10.3390/cancers15010130), 2022-12-26

## **Supplementary Data**

Transcriptomic changes associated with ERBB2 overexpression in colorectal cancer implicates a potential role of Wnt signaling pathway in tumorigenesis

Eman A. Abdul Razzaq, Khuloud Bajbouj, Amal Bouzid, Noura Alkhayal, Rifat Hamoudi and Riyadh Bendardaf

## **Supplementary Tables S5-S7**

## **Supplementary Figure Legends S1-S7**

## **Supplementary Figures S1-S7**

**Supplementary Table S5.** Summary of the total activated cellular pathways identified by GSEA in *ERBB2*+ versus *ERBB2*- colorectal cancer (CRC) patients, CRC cell lines HCT116 and HT29, normal colon cell lines CCD33 and CCD841, and breast cancer (BC) patients (p < 0.05).

|                                   | C2  | C5-BP | C5-MF | C6  | C7   |
|-----------------------------------|-----|-------|-------|-----|------|
| CRC Patients: 3 HER2- vs 11 HER2+ | 9   | 11    | 0     | 5   | 73   |
| HCT116: 3 Ctrl EV vs 3 HER2+      | 6   | 3     | 0     | 0   | 6    |
| HT29: 3 Ctrl EV vs 3 HER2+        | 21  | 24    | 2     | 0   | 42   |
| CCD33 3 Ctrl EV vs 3 HER2+        | 0   | 0     | 0     | 0   | 0    |
| CCD841 3 Ctrl EV vs 3 HER2+       | 2   | 0     | 4     | 0   | 0    |
| BC Patients: 17 HER2+ vs 48 HER2- | 908 | 1379  | 224   | 112 | 2017 |

**Supplementary Table S6:** Details of breast cancer datasets analyzed to determine correlation of *ERBB2*-mediated enrichment of pathways in breast and colon cancer patients. *N*, total number of breast cancer patients.

| Data Set ID | Population        | N         | Comparison of Samples |                 |
|-------------|-------------------|-----------|-----------------------|-----------------|
| GSE29431    | Caucasian/Spanish | 21        | 13 HER2-              | 8 HER2+         |
| GSE48391    | Asian/Chinese     | 44        | 35 HER2-              | 9 HER2+         |
|             |                   | <b>65</b> | <b>48 HER2-</b>       | <b>17 HER2+</b> |

**Supplementary Table S7.** The 26 common activated pathways among CRC and BC HER2+ versus HER2- patients obtained from Gene Set Enrichment Analysis. *ES*, enrichment score; *NES*, normalized ES; *NOM*, nominal; *Tag%*, the percentage of gene tags before (for positive ES) of after (for negative ES) the peak in the running enrichment score; *Gene %*, the percentage of genes in the gene list before (for positive ES) of after (for negative ES) the peak in the running enrichment score; *GO*, gene ontology.

| Gene Sets                                                                           | Class | SIZE | ES      | NES    | NOM p-val | Tag % | Gene % | Signal |
|-------------------------------------------------------------------------------------|-------|------|---------|--------|-----------|-------|--------|--------|
| GSE16385 UNTREATED VS 12H ROSIGLITAZONE TREATED MACROPHAGE DN                       | C7    | 17   | 0.58757 | 1.8687 | 0         | 0.471 | 0.127  | 0.413  |
| GSE25088 WT VS STAT6 KO MACROPHAGE ROSIGLITAZONE AND IL4 STIM UP                    | C7    | 20   | 0.47997 | 1.6523 | 0.002299  | 0.7   | 0.426  | 0.405  |
| GSE17721 PAM3CSK4 VS CPG 16H BMDC DN                                                | C7    | 20   | 0.45969 | 1.5947 | 0.005319  | 0.5   | 0.274  | 0.366  |
| GSE9006 TYPE 1 DIABETES AT DX VS 4MONTH POST DX PBMC DN                             | C7    | 25   | 0.48856 | 1.6076 | 0.006438  | 0.6   | 0.399  | 0.364  |
| GSE39022 LN VS SPLEEN DC UP                                                         | C7    | 19   | 0.53179 | 1.6277 | 0.009546  | 0.632 | 0.317  | 0.435  |
| GSE15659 NONSUPPRESSIVE TCELL VS ACTIVATED TREG UP                                  | C7    | 30   | 0.45884 | 1.7067 | 0.01013   | 0.533 | 0.248  | 0.406  |
| GSE26351 WNT VS BMP PATHWAY STIM HEMATOPOIETIC PROGENITORS UP                       | C7    | 27   | 0.46925 | 1.579  | 0.01295   | 0.63  | 0.396  | 0.384  |
| GSE15624 CTRL VS 6H HALOFUGINONE TREATED CD4 TCELL DN                               | C7    | 26   | 0.49551 | 1.4309 | 0.01431   | 0.538 | 0.304  | 0.378  |
| GSE7509 UNSTIM VS FCGRIB STIM DC UP                                                 | C7    | 22   | 0.48209 | 1.5959 | 0.02103   | 0.545 | 0.28   | 0.396  |
| GSE37534 UNTREATED VS ROSIGLITAZONE TREATED CD4 TCELL PPARG1 AND FOXP3 TRASDUCED UP | C7    | 34   | 0.36357 | 1.4181 | 0.02529   | 0.765 | 0.548  | 0.35   |
| GSE10147 IL3 VS IL3 AND CPG STIM PDC DN                                             | C7    | 18   | 0.53648 | 1.5054 | 0.03178   | 0.556 | 0.241  | 0.424  |
| GSE5542 UNTREATED VS IFNG TREATED EPITHELIAL CELLS 24H UP                           | C7    | 24   | 0.56425 | 1.5257 | 0.03272   | 0.667 | 0.33   | 0.451  |
| GSE3982 MAST CELL VS NKCELL DN                                                      | C7    | 25   | 0.42148 | 1.4406 | 0.035     | 0.56  | 0.332  | 0.378  |
| GSE5589 LPS VS LPS AND IL10 STIM MACROPHAGE 45MIN UP                                | C7    | 21   | 0.49249 | 1.4864 | 0.03846   | 0.619 | 0.337  | 0.414  |
| GSE5542 UNTREATED VS IFNA AND IFNG TREATED EPITHELIAL CELLS 6H UP                   | C7    | 25   | 0.43579 | 1.444  | 0.04065   | 0.44  | 0.22   | 0.346  |
| GSE34156 UNTREATED VS 24H NOD2 AND TLR1 TLR2 LIGAND TREATED MONOCYTE DN             | C7    | 25   | 0.53741 | 1.5764 | 0.04816   | 0.52  | 0.18   | 0.431  |
| GSE45365 CD8A DC VS CD11B DC IFNAR KO MCMV INFECTION UP                             | C7    | 17   | 0.50011 | 1.4465 | 0.04861   | 0.588 | 0.282  | 0.425  |
| MYC UP.V1 UP                                                                        | C6    | 24   | 0.48814 | 1.6908 | 0         | 0.667 | 0.392  | 0.409  |
| ESC V6.5 UP EARLY.V1 UP                                                             | C6    | 24   | 0.45211 | 1.6871 | 0.04251   | 0.583 | 0.382  | 0.364  |
| KIM RESPONSE TO TSA AND DECITABINE UP                                               | C2    | 17   | 0.42292 | 1.462  | 0         | 0.471 | 0.252  | 0.354  |
| PASINI SUZ12 TARGETS UP                                                             | C2    | 15   | 0.42068 | 1.4733 | 0.03937   | 0.467 | 0.276  | 0.34   |
| GO RESPONSE TO BMP                                                                  | C5    | 19   | 0.46386 | 1.671  | 0.01047   | 0.316 | 0.0963 | 0.287  |
| GO CELLULAR COMPONENT ASSEMBLY INVOLVED IN MORPHOGENESIS                            | C5    | 16   | 0.52385 | 1.7083 | 0.01244   | 0.625 | 0.311  | 0.433  |
| GO STEM CELL DIFFERENTIATION                                                        | C5    | 37   | 0.49366 | 1.711  | 0.01877   | 0.459 | 0.268  | 0.341  |
| GO REGULATION OF STEM CELL DIFFERENTIATION                                          | C5    | 21   | 0.57195 | 1.7104 | 0.03081   | 0.524 | 0.268  | 0.386  |
| GO NEGATIVE REGULATION OF WNT SIGNALING PATHWAY                                     | C5    | 29   | 0.38574 | 1.3922 | 0.04762   | 0.276 | 0.136  | 0.241  |

## **Supplementary Figure Legends**

**Supplementary Figure S1.** Schematic representation of the process used to select the HER2- and HER2+ breast cancer patient datasets.

**Supplementary Figure S2.** (A-D) Principal component analysis (PCA) was performed to determine batch effects among triplicate samples of CCD841 (A), CCD33 (B), HCT116 (C), and HT29 (D).

**Supplementary Figure S3.** (A-D) Volcano plot of differentially expressed genes between control (empty vector) and *ERBB2* overexpressing CCD841 (A), CCD33 (B), HCT116 (C), and HT29 (D) cells from input RNA-seq. Genes that are significantly upregulated and downregulated based on log2 fold change, respectively) in cells overexpressing *ERBB2* are demarcated by green and blue circles, respectively versus those that did not show a significant change in expression as grey circles ( $p > 0.05$ ).

**Supplementary Figure S4.** Heat map of the differentially expressed genes between control (empty vector) and *ERBB2* overexpressing normal colon cell lines CCD841 (A) and CCD33 (B).

**Supplementary Figure S5.** Heat map of the differentially expressed genes between control (empty vector) and *ERBB2* overexpressing CRC cell line HCT116. Shown are all the differentially expressed genes (A) and the top 100 differentially expressed genes (B).

**Supplementary Figure S6.** Heat map of the differentially expressed genes between control (empty vector) and *ERBB2* overexpressing CRC cell line HCT116. Shown are all the differentially expressed genes (**A**) and the top 100 differentially expressed genes (**B**).

**Supplementary Figure S7.** (**A**) Heat map of the differentially expressed genes between *ERBB2* negative and positive CRC patients. (**B**) Relative *ERBB2* expressions in the 3 *ERBB2*- and 11 *ERBB2*+ patient samples as determined by whole transcriptome RNA-seq.

## Supplementary Figure S1

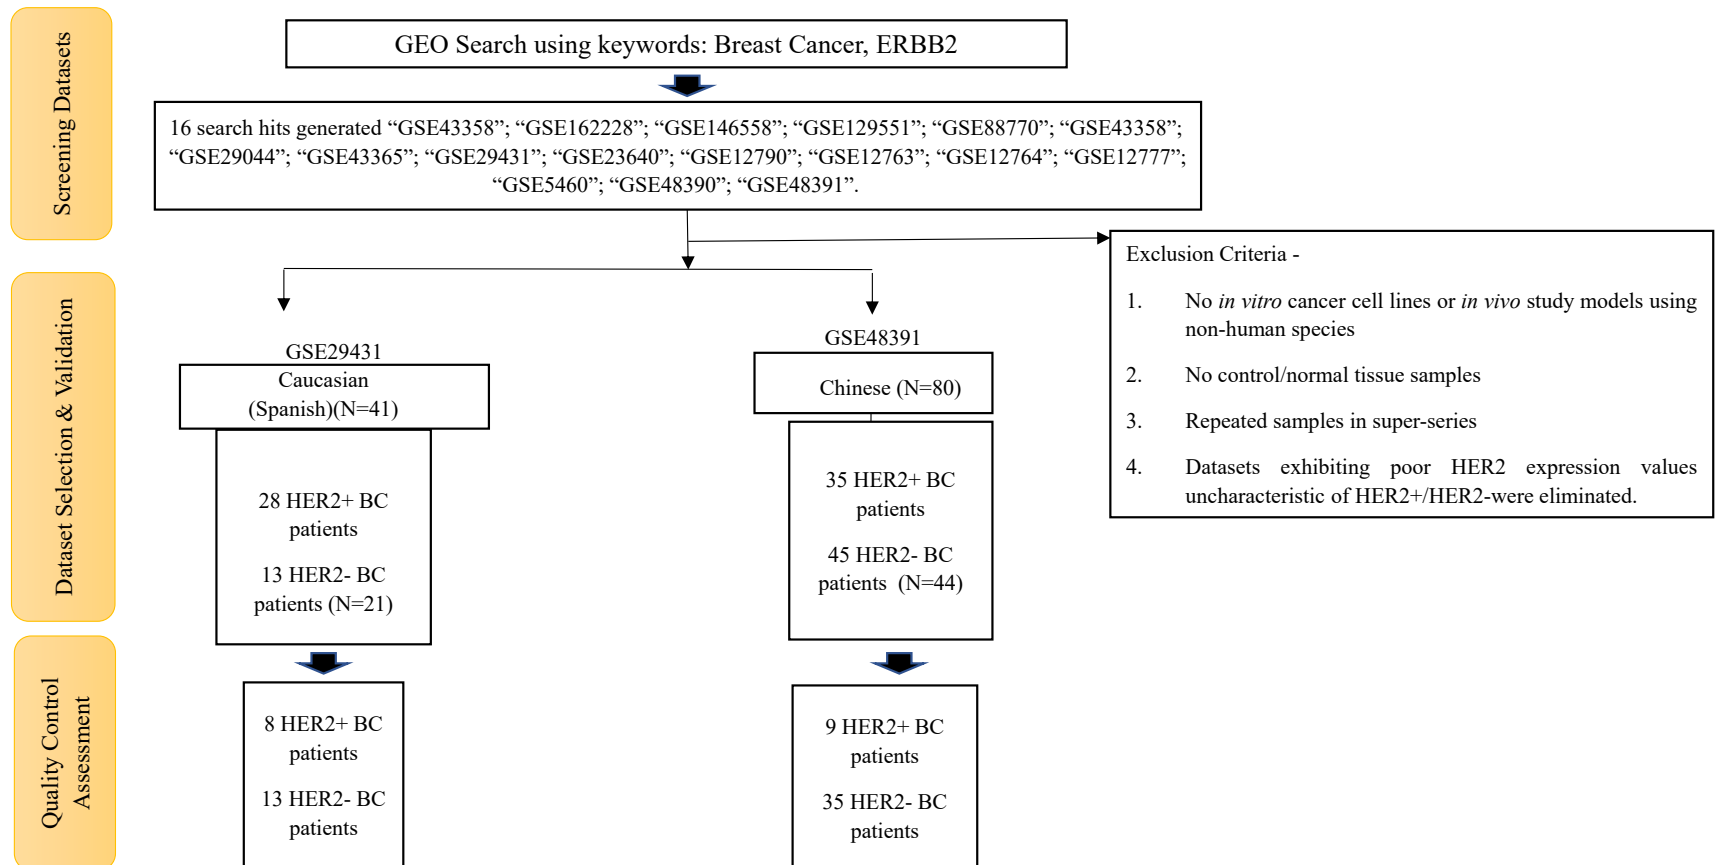

Supplementary Figure S2

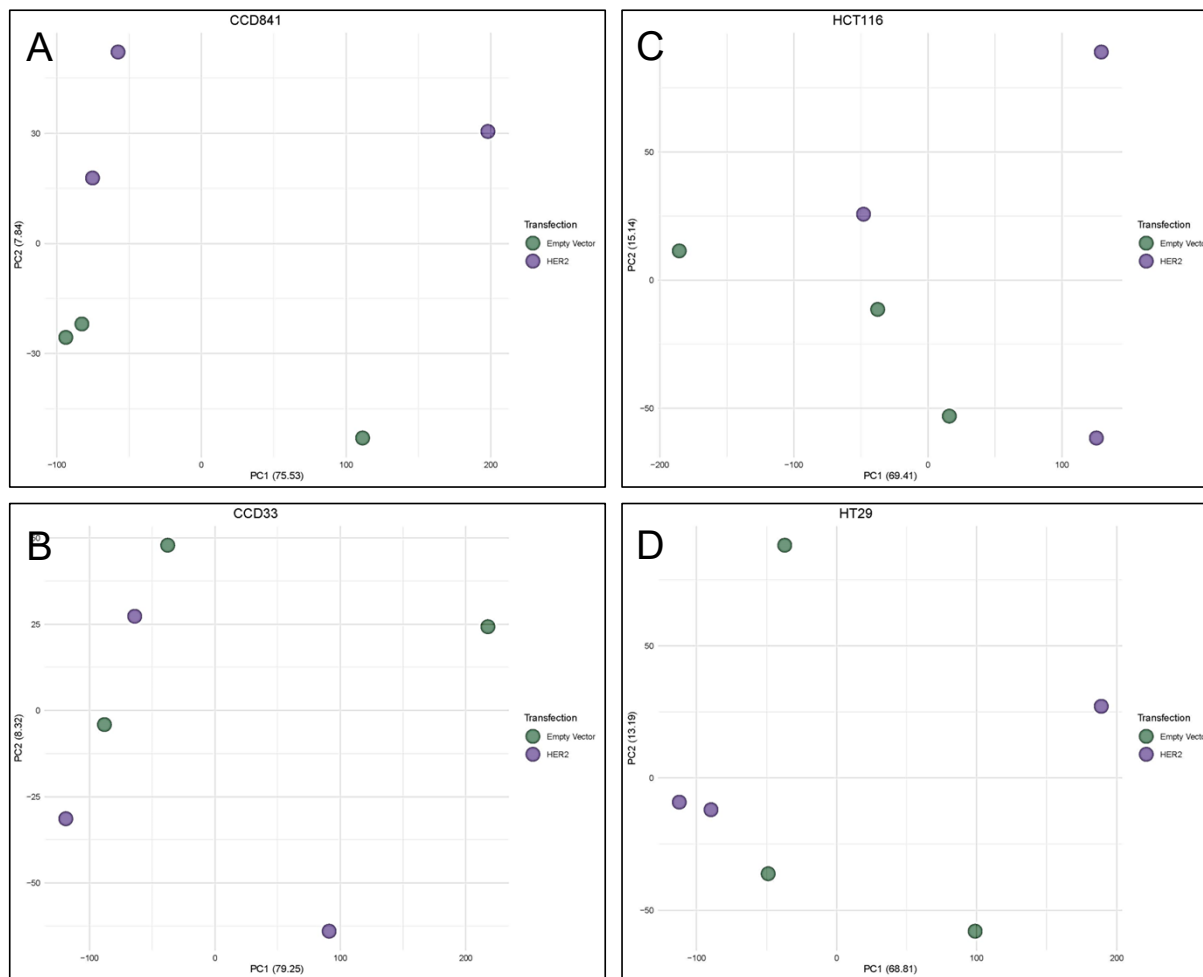



Supplementary Figure S3

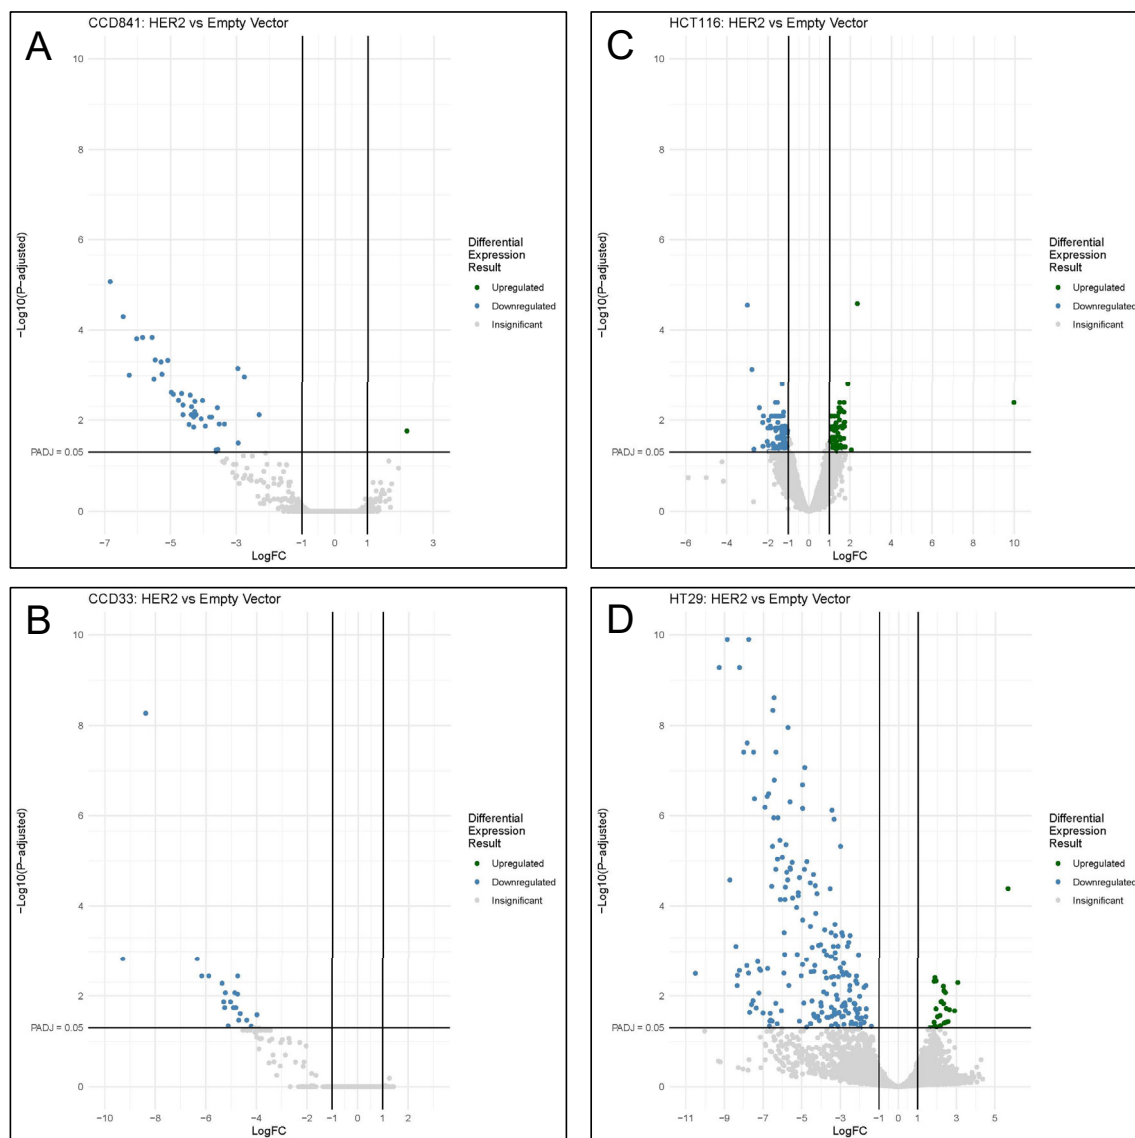

Supplementary Figure S4

A

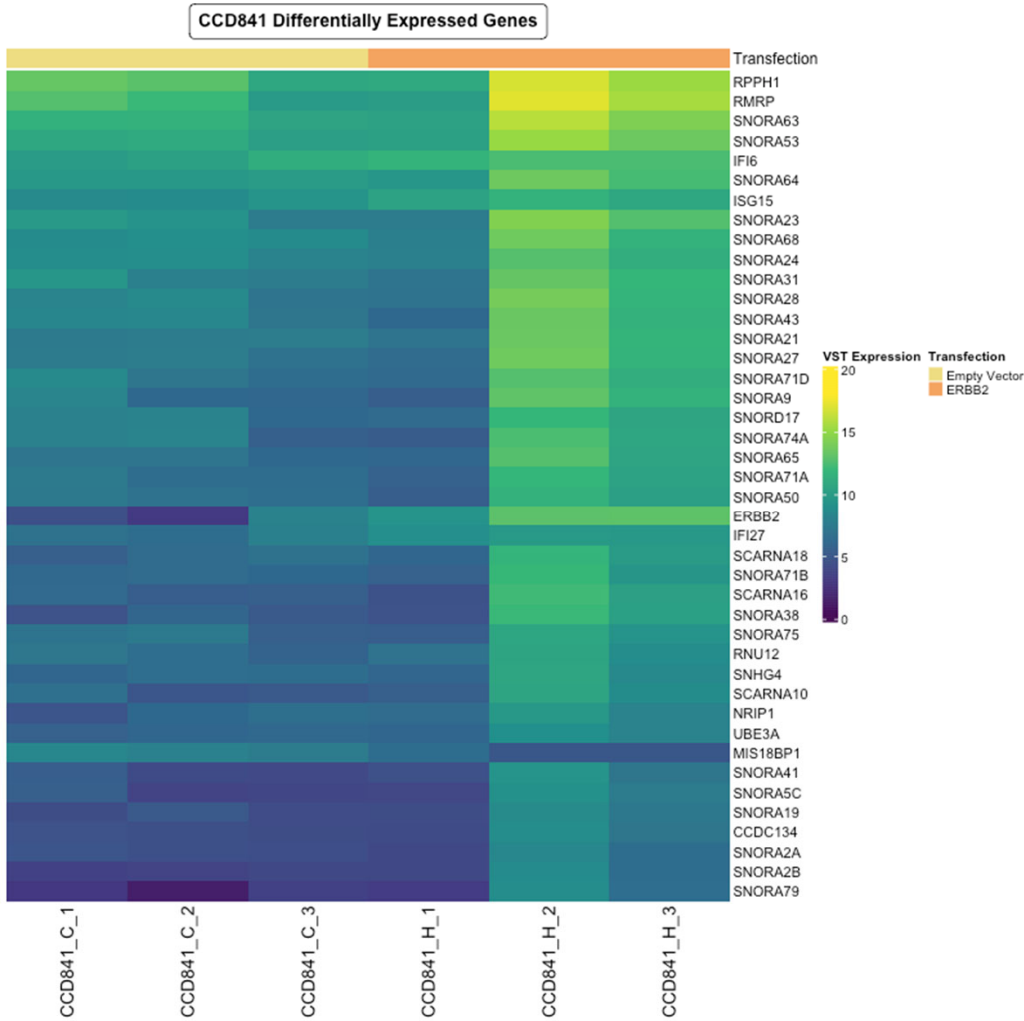

B

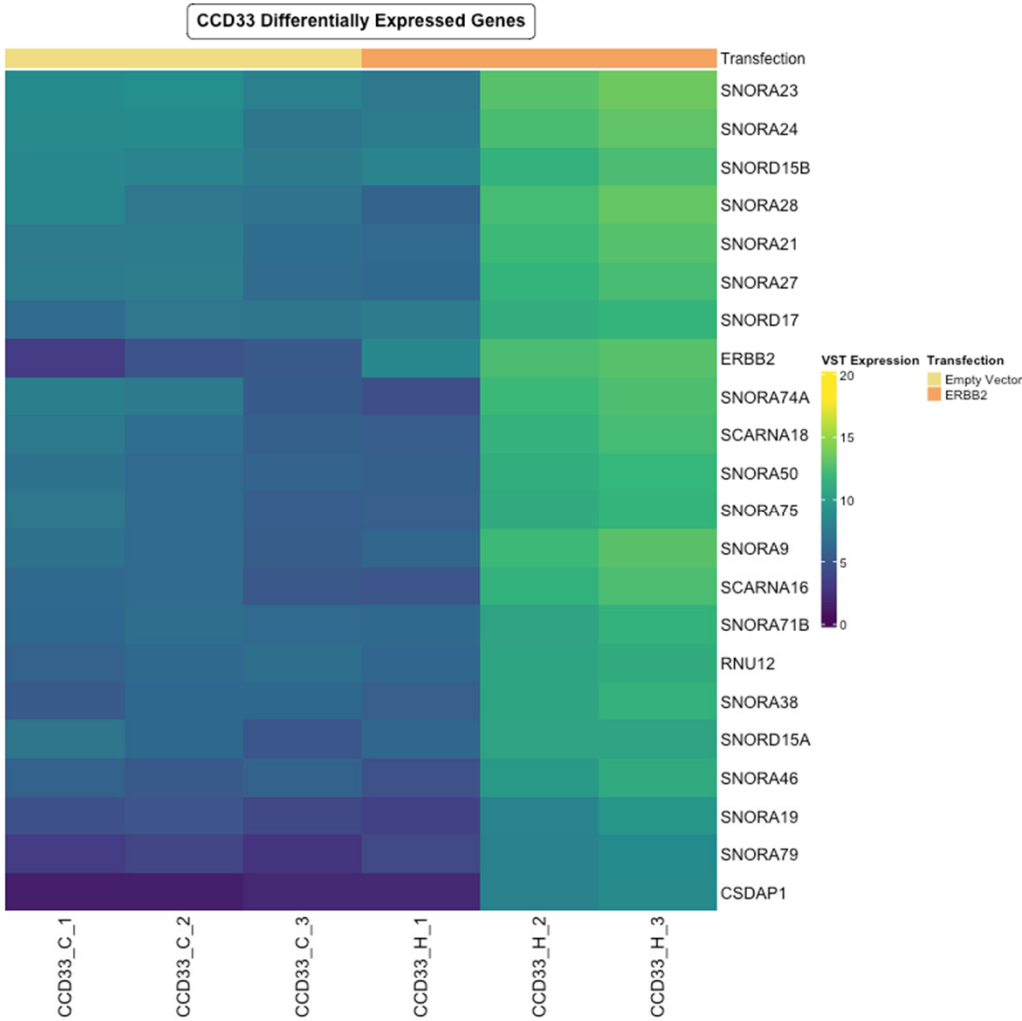

Supplementary Figure S5

A

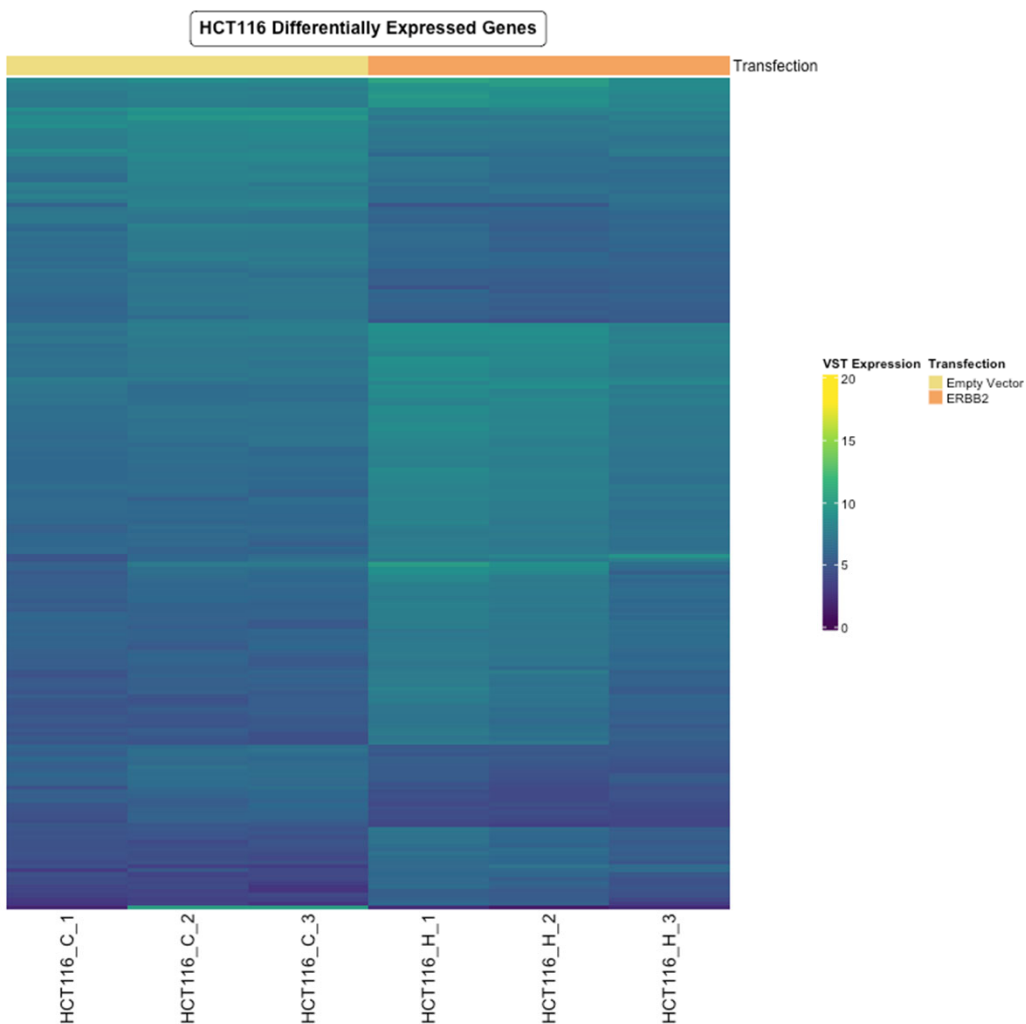

B

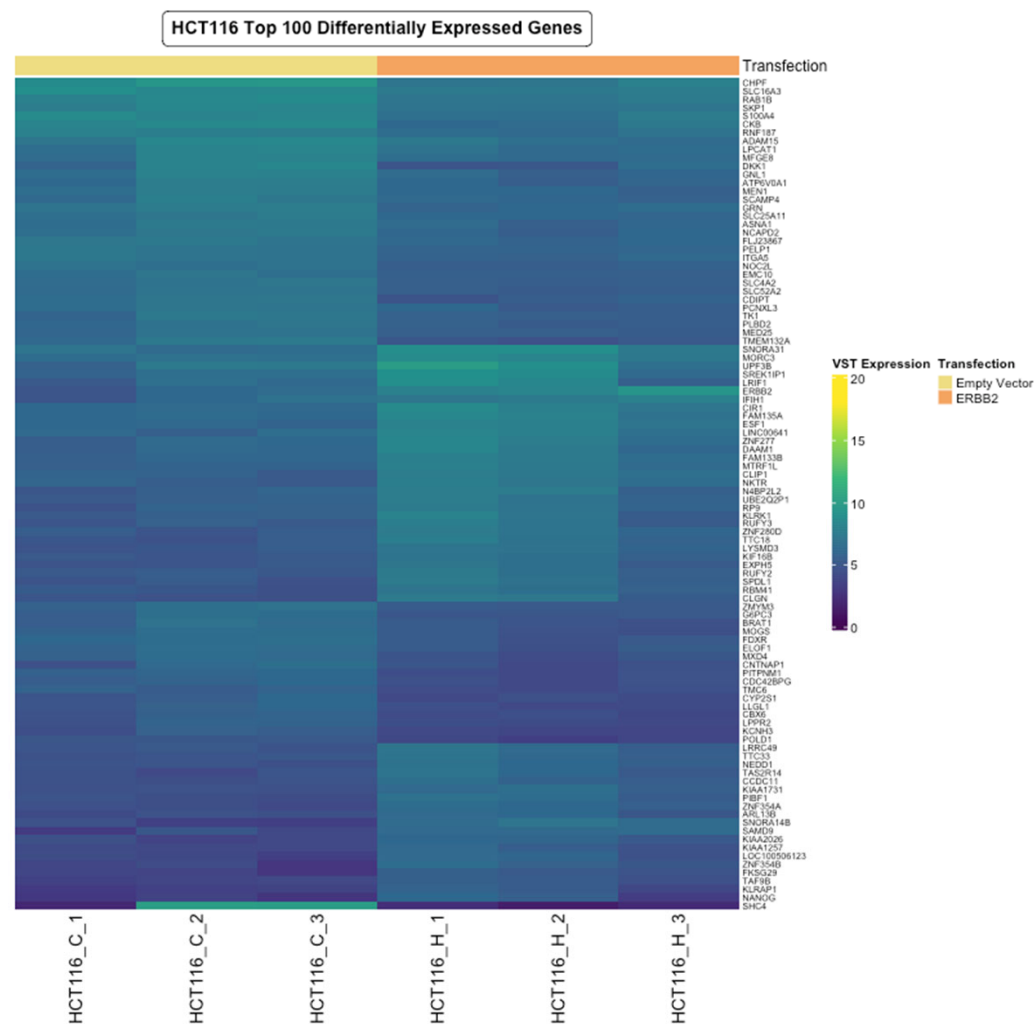

Supplementary Figure S6

A

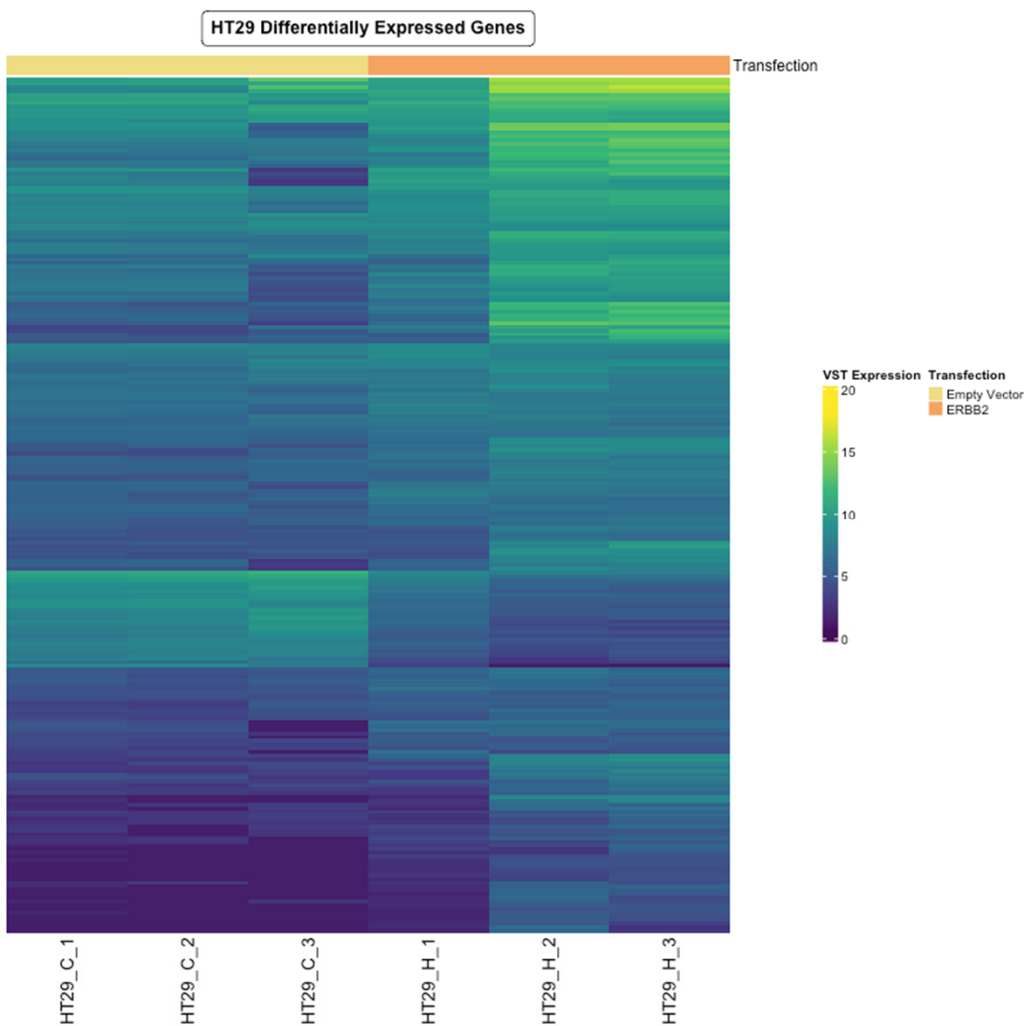

B

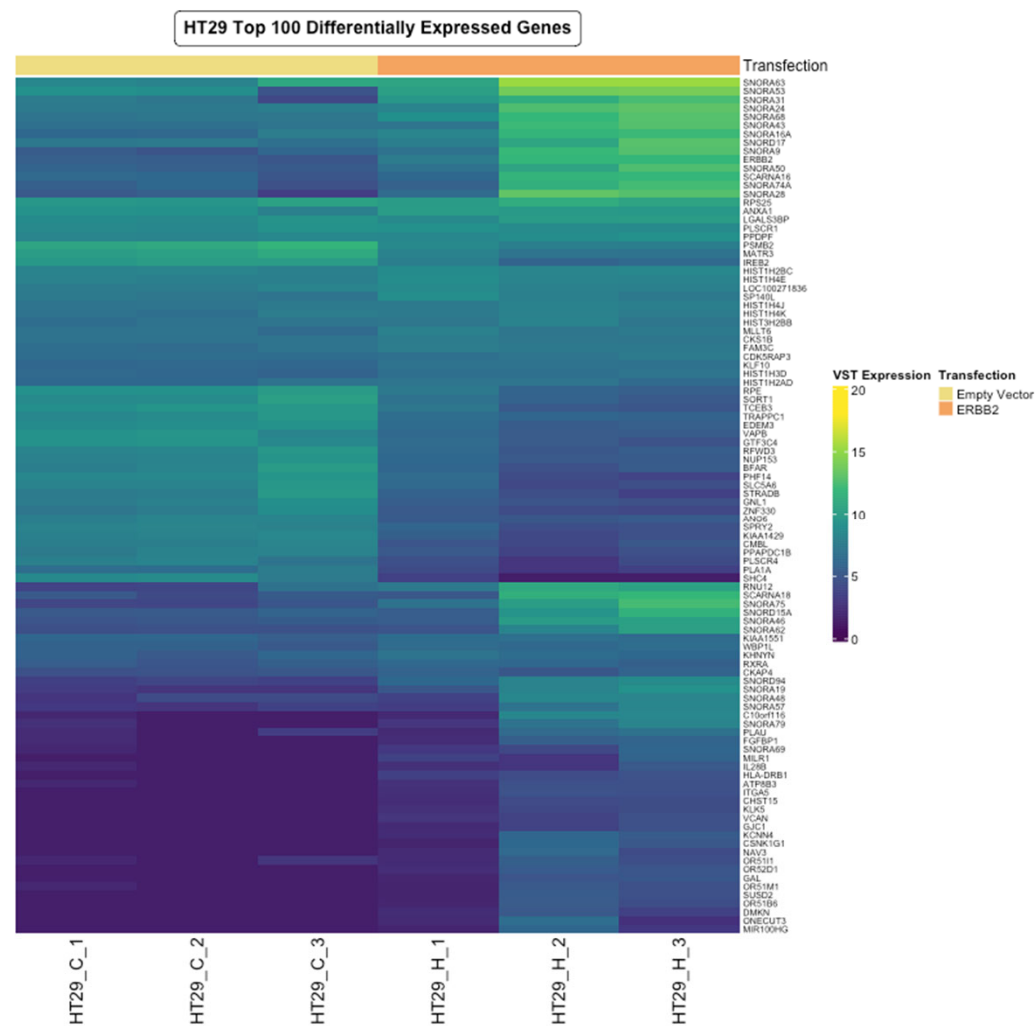

A

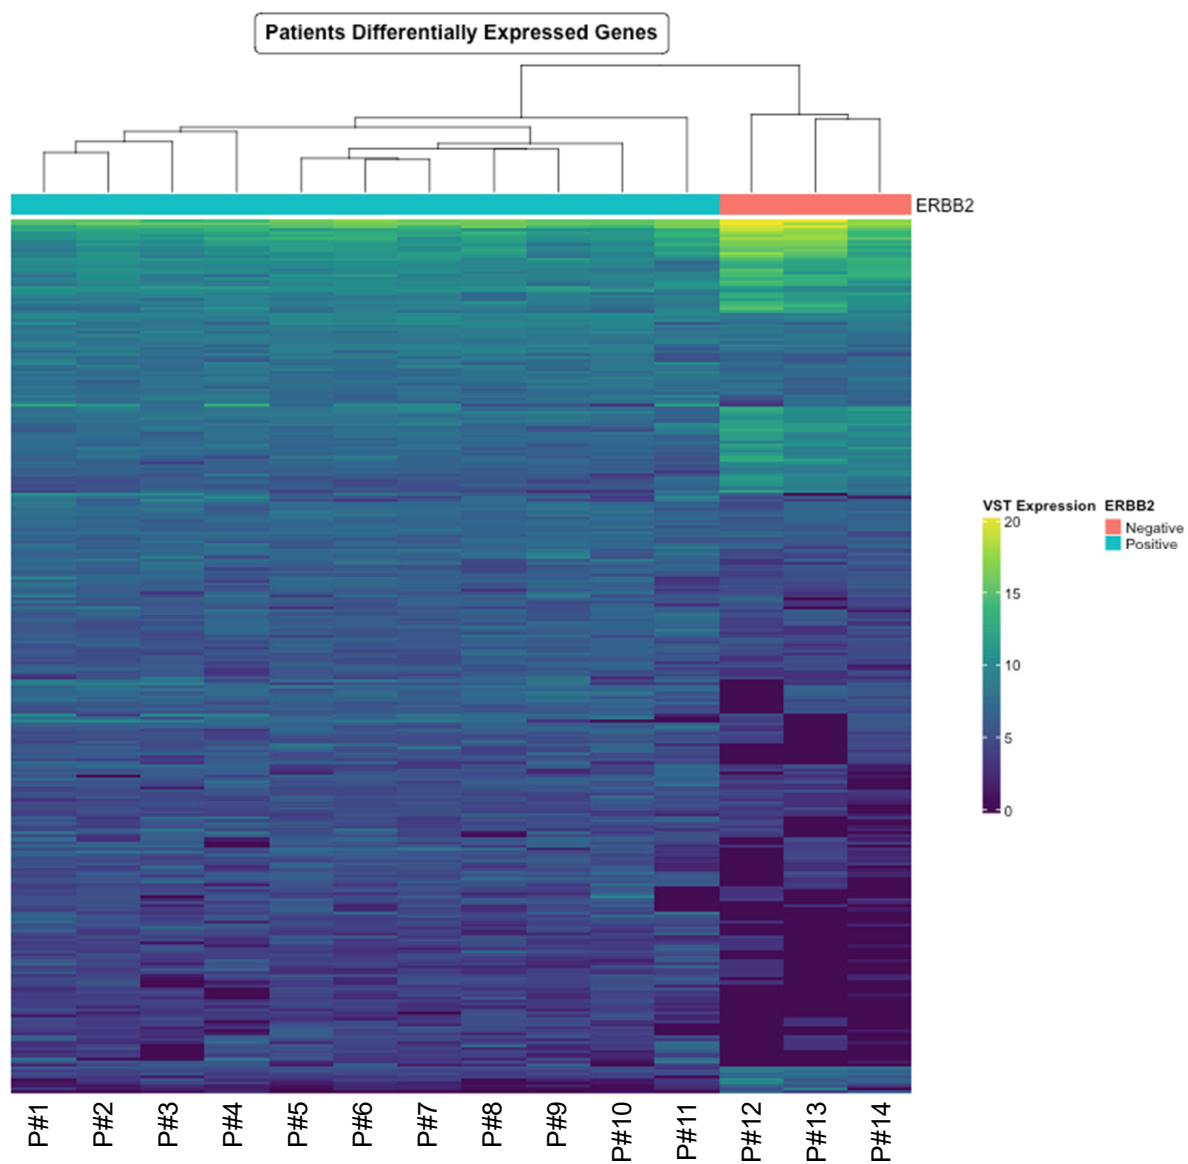

B

Supplementary Figure S7

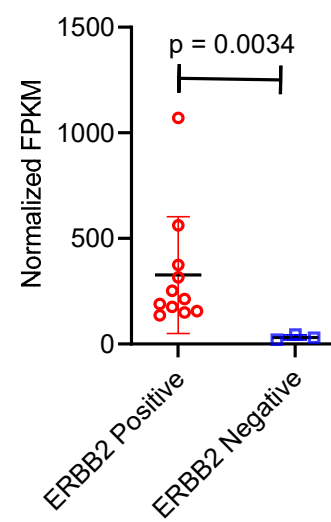

Supplement: s1 [file s1]
