# Supplementary material for: Transcriptomic Changes Associated with ERBB2 Overexpression in Colorectal Cancer Implicate a Potential Role of the Wnt Signaling Pathway in Tumorigenesis
Source: Cancers (Basel). 2022 Dec 26;15(1):130. doi: 10.3390/cancers15010130 (PMC9817785; doi:10.3390/cancers15010130)
Supplement: Supplementary file 1 [file cancers-15-00130-s001.zip]

Archive with 12 entries (12 files):
- Figure S1.TIF
- Figure S2.TIF
- Figure S3.TIF
- Figure S4.TIF
- Figure S5.TIF
- Figure S6.TIF
- Figure S7.TIF
- Revised_Supplementary Table S1_DEGs_Cell lines.xlsx
- Revised_Supplementary Table S2_Clinicopathological characters of the patients.xlsx
- Revised_Supplementary Table S3_DEGs_ patients.xlsx
- Revised_Supplementary Table S4_GSEA detailed output.xlsx
- Supplementary Figures S1-S7 and Tables S5-S7.pdf
