# Supplementary material for: Transcriptomic Changes Associated with ERBB2 Overexpression in Colorectal Cancer Implicate a Potential Role of the Wnt Signaling Pathway in Tumorigenesis
Source: Cancers (Basel). 2022 Dec 26;15(1):130. doi: 10.3390/cancers15010130 (PMC9817785; doi:10.3390/cancers15010130)
Supplement: Supplementary file 1 [file cancers-15-00130-s001.zip › Revised_Supplementary Table S1_DEGs_Cell lines.xlsx]

## Sheet: A- CCD841_DEseq result
Gene	baseMean	log2FoldChange	lfcSE	stat	pvalue	padj
ERBB2	3063.52	-6.83949	1.16552	-5.86817	4.41e-09	8.5e-06
C2orf48	21.5233	22.7287	3.91062	5.81205	6.17e-09	NA
SNORA38	1002.08	-6.44602	1.18397	-5.4444	5.2e-08	5.02e-05
SNORA21	2792.03	-5.56707	1.0805	-5.15231	2.57e-07	0.000144565
SNORA27	3043.98	-5.85553	1.14284	-5.12369	3e-07	0.000144565
SCARNA16	1100.75	-6.03598	1.19059	-5.06975	3.98e-07	0.000153757
SNORA65	1576.99	-5.47323	1.13443	-4.82467	1.4e-06	0.00045109
SCARNA18	811.785	-5.08958	1.06263	-4.78963	1.67e-06	0.000460699
SNORA71B	916.838	-5.29436	1.11546	-4.74636	2.07e-06	0.000499656
IFI27	387.944	-2.96063	0.636191	-4.65368	3.26e-06	0.000699211
SNORA28	3507.17	-5.26604	1.15191	-4.57159	4.84e-06	0.000934203
SNORA79	95.3362	-6.26123	1.37857	-4.54182	5.58e-06	0.000978503
ISG15	1168.64	-2.76347	0.613463	-4.50471	6.65e-06	0.00106895
SNORA9	2230.36	-5.51101	1.2345	-4.46418	8.04e-06	0.00119327
SNORA2B	88.5773	-4.97418	1.15917	-4.29116	1.78e-05	0.00245032
SNORA71A	974.929	-4.66138	1.09324	-4.26383	2.01e-05	0.0025856
SNORA43	2679.31	-4.91164	1.1585	-4.23966	2.24e-05	0.00270025
SNORA68	3112.95	-4.39939	1.04342	-4.2163	2.48e-05	0.00281945
SNORA23	5292.73	-4.75631	1.14809	-4.1428	3.43e-05	0.00367876
SNORA53	9617.15	-4.02369	0.974518	-4.1289	3.65e-05	0.00370256
SNORA63	16796.8	-4.25809	1.03643	-4.10843	3.98e-05	0.00384421
SNORA71D	1769.62	-4.61927	1.1396	-4.0534	5.05e-05	0.00463915
SCARNA10	372.092	-4.3579	1.08351	-4.02201	5.77e-05	0.00506222
SNORA64	3614.69	-3.5735	0.89344	-3.99971	6.34e-05	0.00532175
SNORA50	795.028	-4.26314	1.08101	-3.94367	8.02e-05	0.00645304
SNORA41	148.697	-4.36835	1.12285	-3.89042	0.00010007	0.00755932
CCDC134	109.326	-4.22168	1.08854	-3.87829	0.000105192	0.00755932
RMRP	37135.4	-4.61784	1.19206	-3.87382	0.000107141	0.00755932
IFI6	2894.4	-2.30096	0.59485	-3.86814	0.000109669	0.00755932
SNORA31	2641.69	-4.29234	1.12137	-3.82778	0.000129303	0.00855235
SNHG4	373.918	-3.80601	0.997338	-3.81616	0.000135542	0.00855235
SNORA24	1890.13	-3.7503	0.983592	-3.81286	0.000137369	0.00855235
SNORA19	107.302	-4.06439	1.07431	-3.78324	0.0001548	0.0093364
RNU12	384.902	-3.51588	0.947839	-3.70936	0.000207781	0.0121402
NRIP1	212.2	-3.35814	0.907104	-3.70204	0.00021387	0.0121402
SNORA74A	1436.04	-4.43559	1.20244	-3.68881	0.000225303	0.0124239
SNORD17	1058.49	-3.93879	1.07591	-3.66089	0.000251336	0.0134744
SNORA5C	136.657	-4.29321	1.17882	-3.64194	0.000270588	0.0141145
MIS18BP1	100.316	2.19845	0.613433	3.58385	0.000338569	0.0171957
UBE3A	159.769	-2.93893	0.860715	-3.41452	0.000638937	0.0316192
SNORA75	456.578	-3.55809	1.07233	-3.31809	0.000906351	0.0437314
SNORA2A	80.0218	-3.60565	1.09078	-3.30557	0.00094785	0.0446183
RPPH1	31483.1	-3.61317	1.10297	-3.27584	0.00105347	0.0484095
B2M	1916.98	-2.10477	0.648218	-3.247	0.00116626	0.0523463
SNORA70	2824.54	-2.78105	0.869317	-3.19912	0.00137848	0.0604651
PDIA5	147.687	-2.50738	0.786088	-3.18969	0.00142425	0.0610847
COL9A3	14.3648	-5.79415	1.83137	-3.16383	0.00155706	NA
SNORA71C	1017.92	-3.29333	1.04834	-3.14147	0.00168103	0.0705303
LUC7L3	277.379	1.64526	0.530136	3.10346	0.0019127	0.0785429
SNORD15A	192.842	-3.41373	1.10479	-3.08994	0.00200197	0.0804959
SNORA62	160.366	-3.36235	1.09648	-3.06649	0.00216588	0.0853091
SCARNA1	23.8159	-3.41676	1.12429	-3.03905	0.00237323	NA
FBXO5	50.9018	2.03082	0.669191	3.03474	0.00240742	NA
PRDX4	57.0131	-2.23134	0.735783	-3.0326	0.00242457	NA
SNORA74B	95.7769	-3.08174	1.01667	-3.0312	0.00243583	0.0931021
SNORD15B	1053.13	-3.00504	0.992354	-3.02819	0.00246021	0.0931021
RNH1	98.4968	-2.06123	0.683336	-3.01642	0.00255777	0.0931556
HLA-C	395.593	-1.68164	0.557502	-3.01638	0.00255816	0.0931556
LGALS1	306.017	-1.46743	0.488455	-3.00424	0.00266248	0.0951589
SCARNA2	19.4505	-3.86119	1.30463	-2.95961	0.00308031	NA
SNORA66	265.877	-2.66913	0.905618	-2.9473	0.00320562	0.112488
ASPM	100.715	1.94129	0.660153	2.94067	0.00327507	0.112873
EIF4E2	26.6858	-2.85841	0.978169	-2.9222	0.00347563	NA
CD320	32.2301	-2.68336	0.919604	-2.91795	0.00352337	NA
TMEM175	16.4139	-4.3803	1.50458	-2.91131	0.00359916	NA
CHRM4	7.22287	5.03646	1.73742	2.89882	0.00374568	NA
RELB	59.3533	-2.04223	0.705906	-2.89306	0.00381508	NA
MRPL54	19.0369	-3.24135	1.12249	-2.88765	0.00388134	NA
POLR2E	131.883	-2.15796	0.747893	-2.88539	0.00390931	0.132368
IFI44	194.52	-1.55878	0.542163	-2.87511	0.00403885	0.134396
SNORA42	125.06	-3.10452	1.08797	-2.8535	0.00432405	0.141448
RAB3IP	58.7915	2.03142	0.719966	2.82155	0.00477927	NA
ARID2	49.4475	2.02448	0.721255	2.80688	0.00500238	NA
SLC34A3	9.56613	-5.58376	1.98943	-2.80671	0.00500499	NA
SNORA5A	930.924	-2.73453	0.97475	-2.80537	0.00502594	0.161668
SCARNA3	89.6858	-2.54728	0.91152	-2.79454	0.00519739	0.164442
SNORA6	139.053	-2.98299	1.07034	-2.78696	0.00532058	0.165624
C6orf141	46.8057	2.24203	0.80925	2.77051	0.00559694	NA
NBEA	18.4496	3.12717	1.1304	2.76643	0.00566739	NA
SNORA16A	1228.81	-3.0238	1.09916	-2.75102	0.005941	0.182002
TROAP	13.3101	-4.19959	1.52839	-2.74772	0.00600104	NA
SCARNA15	31.5025	-3.4252	1.24674	-2.74733	0.0060083	NA
SNORA46	217.422	-2.78418	1.02027	-2.72887	0.00635518	0.189635
LGALS3BP	455.047	-1.85719	0.681293	-2.72597	0.00641125	0.189635
UQCR11	119.009	-1.65036	0.60626	-2.7222	0.00648494	0.189635
SNORA34	350.355	-2.60746	0.962551	-2.7089	0.00675062	0.194458
LOC100129518	7.08075	6.24612	2.3064	2.70817	0.00676555	NA
NDUFB7	29.8214	-2.44825	0.905614	-2.70341	0.00686315	NA
PRSS16	7.96454	4.52416	1.67436	2.70202	0.00689199	NA
SLC25A13	52.8663	-2.48523	0.92024	-2.70063	0.00692075	NA
FNTA	125.016	-2.24631	0.837017	-2.68371	0.0072811	0.206655
WHSC2	32.4289	-2.32408	0.868859	-2.67487	0.00747581	NA
SNORA81	290.038	-2.54123	0.950591	-2.67331	0.0075106	0.210079
TMEM41A	33.6742	2.26876	0.85122	2.6653	0.00769197	NA
ZNF76	11.5078	-4.35621	1.63488	-2.66455	0.00770915	NA
SIVA1	48.5551	-2.22359	0.834649	-2.6641	0.00771947	NA
SNORA8	5495.41	-2.37464	0.895404	-2.65204	0.00800074	0.220592
LY6E	214.279	-1.6253	0.616257	-2.63737	0.0083552	0.226674
IFITM3	519.521	-1.35307	0.513834	-2.63329	0.00845622	0.226674
IFITM1	508.882	-1.39956	0.533663	-2.62255	0.00872747	0.23074
CYBA	147.139	-2.15976	0.826145	-2.61427	0.00894195	0.233098
HMGB2	731.575	1.39587	0.535385	2.60724	0.00912767	0.233098
NEAT1	926.022	1.16776	0.448222	2.60532	0.00917897	0.233098
ARHGEF26	28.1065	2.11663	0.812527	2.60499	0.00918768	NA
SNORA52	281.729	-2.90771	1.12516	-2.58427	0.00975852	0.24387
CCDC91	83.2935	-1.85157	0.717427	-2.58084	0.00985589	0.24387
SPRY4	6.72793	-4.34009	1.68778	-2.57147	0.0101267	NA
MXI1	116.651	1.73452	0.674794	2.57044	0.0101569	0.248137
ZNF738	6.28836	-4.27068	1.66892	-2.55896	0.0104987	NA
AUP1	83.3451	-1.7021	0.667238	-2.55097	0.0107424	0.259161
ELN	5.33258	-5.34022	2.10618	-2.5355	0.0112288	NA
C4orf48	34.8529	-2.47496	0.97767	-2.53149	0.0113581	NA
IFITM2	181.524	-1.39245	0.55109	-2.52673	0.0115131	0.274324
MAP2K4	48.2899	-2.23426	0.889591	-2.51156	0.01202	NA
SNORA12	573.35	-2.03291	0.810417	-2.50847	0.0121254	0.28539
ISOC2	22.3009	-2.32199	0.926371	-2.50655	0.0121917	NA
ANKRD26	40.2986	1.63299	0.651714	2.50568	0.0122216	NA
AIFM3	3.33689	5.19316	2.07755	2.49965	0.0124316	NA
C5orf44	28.993	-2.32001	0.928174	-2.49955	0.0124352	NA
LOC647859	35.5481	1.91464	0.767389	2.49501	0.0125954	NA
TRIM38	41.3221	-1.54079	0.620323	-2.48386	0.0129968	NA
GRB14	21.0778	2.41083	0.972557	2.47885	0.0131806	NA
ARSE	12.1813	-3.71129	1.49975	-2.47461	0.0133383	NA
SNX32	8.20437	4.1511	1.68022	2.47057	0.0134899	NA
RSPH3	56.2777	1.57187	0.637024	2.46753	0.013605	NA
C1QTNF3	13.3808	2.92129	1.18899	2.45695	0.0140123	NA
C19orf60	10.2001	-3.68492	1.50456	-2.44918	0.0143183	NA
SNORA77	20.3369	-2.85324	1.16552	-2.44804	0.0143638	NA
IKBKB	36.9461	-2.06937	0.845742	-2.4468	0.0144129	NA
SCN8A	20.5817	2.98503	1.22229	2.44216	0.0145998	NA
TIMM13	49.1185	-1.8411	0.753885	-2.44214	0.0146004	NA
C10orf118	107.952	1.45467	0.596444	2.4389	0.0147319	0.342561
CENPF	80.7491	1.6617	0.684182	2.42874	0.0151513	0.348119
GPR146	10.2981	2.94915	1.217	2.42329	0.0153806	NA
NUCKS1	418.304	1.26048	0.521884	2.41525	0.0157244	0.357036
DUSP2	9.46871	-3.85336	1.59965	-2.40888	0.0160017	NA
EMC10	96.001	-1.40655	0.586284	-2.3991	0.0164353	0.36884
CENPE	37.3162	2.15504	0.90257	2.38767	0.0169554	NA
ARHGAP10	59.0989	-2.01694	0.845288	-2.3861	0.0170283	NA
FAM72D	47.5302	1.53119	0.643252	2.38039	0.0172944	NA
DIS3L	44.3884	1.85842	0.788088	2.35814	0.0183669	NA
FCGR2B	3.83427	5.35042	2.27198	2.35496	0.0185246	NA
TOP2A	186.311	1.41396	0.6006	2.35425	0.0185601	0.407498
SDF4	189.337	-1.28967	0.547897	-2.35385	0.0185802	0.407498
MRPL12	75.1839	-2.0868	0.887063	-2.35249	0.0186483	NA
DCAF16	94.5105	1.51522	0.645596	2.347	0.018925	0.410397
TACSTD2	37.1284	1.86236	0.798123	2.33342	0.0196259	NA
NMI	17.8024	-2.29672	0.984558	-2.33275	0.0196615	NA
KIAA1324L	4.91227	3.65909	1.57152	2.32838	0.0198917	NA
PRPH	8.51688	3.10876	1.34411	2.31287	0.0207297	NA
ZIC2	5.01813	3.67126	1.59107	2.30741	0.021032	NA
IGFL4	4.39831	5.52437	2.3989	2.30288	0.0212855	NA
AP3S1	299.295	-2.04465	0.888303	-2.30174	0.0213497	0.457832
NLE1	29.0366	-2.5546	1.11419	-2.29278	0.0218609	NA
SCARNA5	602.651	-2.33703	1.02106	-2.28882	0.0220899	0.468501
PROSER1	74.0426	1.37229	0.601544	2.28128	0.0225317	NA
DHDDS	51.6124	-1.94966	0.855256	-2.27962	0.0226301	NA
MGC2752	20.6702	-2.21578	0.972434	-2.27859	0.0226914	NA
LOC728377	5.79948	-5.4331	2.39242	-2.27096	0.0231492	NA
SKAP2	78.5426	1.38936	0.611963	2.27033	0.0231874	0.486432
SCRN3	18.1092	2.32186	1.02275	2.27022	0.0231941	NA
C2orf47	41.9407	1.66111	0.734044	2.26296	0.0236382	NA
WRAP73	18.1531	-2.259	0.999187	-2.26084	0.0237693	NA
WDR34	33.1955	-1.96497	0.869185	-2.26071	0.0237775	NA
LCORL	63.0289	-1.99391	0.883431	-2.25701	0.0240073	NA
NFIB	11.5633	2.19763	0.973972	2.25635	0.0240485	NA
KAT5	55.6936	-1.41235	0.626456	-2.25451	0.024164	NA
ARHGAP23	62.84	-1.78616	0.792394	-2.25414	0.0241875	NA
NPLOC4	79.135	-1.26802	0.562905	-2.25264	0.0242819	0.503914
NEBL	13.2432	2.63802	1.17731	2.24073	0.0250437	NA
ADRM1	157.647	-1.31582	0.587674	-2.23903	0.0251538	0.516455
TMEM181	134.136	-1.50131	0.672193	-2.23345	0.0255196	0.51845
ZBTB10	28.2932	1.6832	0.754811	2.22997	0.0257497	NA
RBM41	43.5191	1.71123	0.768078	2.22794	0.0258846	NA
SPHK2	4.61386	4.22472	1.89771	2.22622	0.0259996	NA
ZNF280D	36.7524	1.81927	0.817534	2.22532	0.0260598	NA
LOC100507217	75.7086	-1.6369	0.738628	-2.21613	0.0266825	NA
TNFRSF21	156.159	-1.1141	0.503946	-2.21076	0.0270528	0.537976
HEXB	91.6959	-1.60234	0.725115	-2.20977	0.0271211	0.537976
FDCSP	5.79475	5.89681	2.66894	2.20942	0.0271457	NA
PTGES3	709.651	-1.55063	0.703217	-2.20505	0.0274509	0.537976
SGOL2	33.0529	1.82291	0.826821	2.20472	0.0274737	NA
AMN	7.8017	-5.83296	2.64904	-2.20191	0.0276717	NA
ADRA2C	16.1409	2.43136	1.106	2.19834	0.0279247	NA
OAS3	179.266	-1.27033	0.579978	-2.19031	0.0285014	0.537976
CSDAP1	4.49085	-5.06969	2.31529	-2.18966	0.0285489	NA
GTPBP6	20.8652	-1.98147	0.905978	-2.1871	0.0287349	NA
LSR	16.6041	-3.1261	1.4315	-2.18379	0.028978	NA
QPRT	18.7191	-2.59621	1.18999	-2.18171	0.029131	NA
TFDP2	46.5616	1.34003	0.61424	2.18161	0.0291384	NA
ZFP91	312.416	1.25497	0.575409	2.181	0.0291834	0.537976
CCT2	71.1301	-1.49387	0.685597	-2.17894	0.0293363	NA
MRPS9	34.406	1.58326	0.727554	2.17615	0.0295443	NA
SLC9A3R1	52.5677	-1.70936	0.787645	-2.17021	0.0299906	NA
SKA3	51.1984	1.66357	0.766921	2.16915	0.0300713	NA
URI1	257.409	-1.84875	0.853604	-2.16582	0.0303251	0.537976
NCAPG	174.408	1.66556	0.770204	2.1625	0.0305797	0.537976
ZNF576	11.7176	-2.48636	1.14989	-2.16226	0.0305978	NA
SNORA49	611.991	-1.73101	0.800715	-2.16183	0.0306314	0.537976
HLA-E	321.075	-1.25671	0.581714	-2.16036	0.030745	0.537976
CORO1C	97.391	-1.57853	0.730764	-2.16012	0.0307637	0.537976
MED13L	126.081	1.09095	0.505144	2.15969	0.0307967	0.537976
KAT7	183.208	1.27889	0.592433	2.1587	0.0308731	0.537976
SNORA67	205.774	-2.05013	0.949858	-2.15836	0.0309002	0.537976
MAT2A	241.792	1.35754	0.629012	2.1582	0.0309121	0.537976
UBE2V1	19.5386	1.95619	0.907311	2.15603	0.0310813	NA
CLPTM1L	82.9584	-1.29868	0.602714	-2.15472	0.0311837	0.537976
RPS6	1276.6	0.931097	0.432152	2.15456	0.0311962	0.537976
UNKL	16.4559	-2.54469	1.18128	-2.15417	0.0312265	NA
EXOC7	88.2587	-1.30964	0.607975	-2.15409	0.0312328	0.537976
CDK5RAP2	44.1435	1.34123	0.622661	2.15402	0.0312386	NA
CEP152	29.7474	1.86356	0.865997	2.15192	0.0314037	NA
RARRES3	140.208	-1.26775	0.589452	-2.15072	0.0314981	0.537976
PIK3CB	109.854	1.25048	0.582442	2.14697	0.0317959	0.5383
NMNAT3	2.8307	4.44006	2.06839	2.14662	0.0318232	NA
VRTN	5.38083	5.78416	2.70545	2.13796	0.0325199	NA
UBE2Q2P1	41.6649	1.65288	0.77405	2.13537	0.0327312	NA
SNORD94	78.4276	-2.14947	1.0079	-2.13263	0.0329552	0.553074
ST3GAL1	55.5259	-1.29299	0.608332	-2.12547	0.0335475	NA
OAS2	74.3311	-1.96875	0.927103	-2.12355	0.0337081	NA
CD82	43.3471	-1.58662	0.747385	-2.12289	0.0337631	NA
FMN1	22.349	1.73198	0.816155	2.12212	0.0338273	NA
RPS9	278.436	-1.41005	0.66765	-2.11196	0.0346901	0.576987
SNORA69	17.3684	-3.2966	1.56225	-2.11016	0.0348442	NA
UBE2T	194.795	1.16134	0.551334	2.10642	0.0351677	0.576987
MDK	306.768	-1.30209	0.61852	-2.10516	0.035277	0.576987
RAB9BP1	6.32166	4.68768	2.23163	2.10057	0.0356789	NA
SCARNA12	331.665	-1.96909	0.940163	-2.09441	0.0362232	0.586234
TSSC4	24.5634	-2.19523	1.04859	-2.0935	0.0363049	NA
PHB	92.3694	-1.62899	0.778724	-2.09187	0.0364498	0.586234
ZNF250	14.2903	-2.8736	1.37526	-2.0895	0.0366626	NA
DPY19L1P1	5.89621	2.88759	1.38434	2.0859	0.0369881	NA
MVP	47.7919	-1.46934	0.70465	-2.08521	0.0370502	NA
PHF6	69.3709	1.16853	0.560995	2.08297	0.0372542	NA
TAZ	20.5303	-2.16454	1.03919	-2.0829	0.0372602	NA
DPPA3	5.22114	-5.25388	2.523	-2.08239	0.0373064	NA
RPS19BP1	25.7505	-1.81462	0.871697	-2.08171	0.0373691	NA
PIAS2	56.9565	1.62209	0.779477	2.081	0.0374338	NA
MTIF3	87.2735	1.38288	0.665075	2.07928	0.0375919	0.599607
PNPO	30.5277	-1.99255	0.95856	-2.07869	0.0376461	NA
PSMB9	70.0183	-1.50229	0.72295	-2.07799	0.03771	NA
GTSF1L	3.63529	5.22177	2.51462	2.07656	0.0378417	NA
GAL	31.8278	-2.37151	1.1429	-2.07499	0.0379873	NA
NAPA	88.2611	-1.16171	0.560691	-2.07193	0.0382723	0.600575
UPF3B	89.7294	1.54442	0.745415	2.0719	0.038275	0.600575
MAP7	133.874	1.06634	0.516577	2.06425	0.038994	0.606923
ACADS	11.7407	-2.47548	1.19939	-2.06395	0.0390226	NA
ZNF117	31.7257	1.54868	0.750414	2.06377	0.0390396	NA
LOC595101	55.8268	1.64351	0.796406	2.06366	0.0390496	NA
CLRN3	5.93285	4.5976	2.22986	2.06183	0.0392237	NA
SLC22A17	14.6295	2.39819	1.16769	2.05379	0.0399961	NA
PGF	4.70702	-3.8326	1.86619	-2.0537	0.0400049	NA
CEP55	69.7658	1.49091	0.726341	2.05263	0.0401087	NA
THUMPD2	29.0346	1.56818	0.765732	2.04795	0.0405654	NA
DCTPP1	68.033	-1.54998	0.756972	-2.04761	0.0405981	NA
TNK1	5.55239	-4.06639	1.98647	-2.04704	0.0406542	NA
UBE2L6	70.9743	-1.9136	0.935562	-2.04541	0.0408148	NA
RRAGD	20.0633	1.56977	0.76777	2.04458	0.0408964	NA
TFDP3	3.52569	4.75288	2.32552	2.04379	0.0409744	NA
C4orf21	15.0679	2.11693	1.03582	2.04373	0.0409806	NA
PRKRIR	96.8548	1.0893	0.533228	2.04283	0.0410689	0.623375
THOC2	139.021	1.23436	0.604542	2.0418	0.0411711	0.623375
SNORA39	3.8341	-4.23682	2.07531	-2.04154	0.0411975	NA
ADAM22	11.962	2.00051	0.981433	2.03836	0.0415139	NA
CSTB	105.937	-1.03459	0.508005	-2.03658	0.0416926	0.623375
SF3B1	265.007	1.03525	0.508428	2.03617	0.0417331	0.623375
CLU	118.187	-1.31467	0.647123	-2.03156	0.0421986	0.623375
PSMB7	140.612	-1.09326	0.53831	-2.03092	0.042263	0.623375
DANCR	52.0623	1.40725	0.69294	2.03083	0.0422718	NA
EPB41L1	80.4656	1.17845	0.580389	2.03044	0.042312	0.623375
TRIM65	23.8185	-1.91031	0.941536	-2.02893	0.0424657	NA
DDAH2	5.09107	-3.59466	1.77273	-2.02776	0.042585	NA
MCM5	44.1019	-2.16789	1.06948	-2.02705	0.0426573	NA
REEP4	19.3397	2.15693	1.06485	2.02556	0.0428097	NA
GRHPR	48.38	-1.47098	0.726483	-2.02479	0.0428889	NA
COQ2	33.9593	1.56606	0.773898	2.0236	0.0430112	NA
KRT15	16.1863	-2.20374	1.08929	-2.02311	0.043062	NA
CCNG2	33.9204	1.35258	0.668981	2.02186	0.0431913	NA
RRS1	40.7107	-1.48556	0.736951	-2.01582	0.0438187	NA
LINC00471	8.09111	2.34027	1.16132	2.01519	0.0438845	NA
PIN1	25.2056	-1.66565	0.826838	-2.01449	0.0439586	NA
TMED3	67.1419	-1.42394	0.706862	-2.01445	0.0439623	NA
ATXN3	53.8028	1.28001	0.636282	2.0117	0.0442513	NA
SNORA48	74.736	-2.30577	1.14725	-2.00983	0.0444493	NA
CADM4	6.15874	-3.36339	1.67525	-2.0077	0.0446754	NA
LOC339240	3.44089	5.14208	2.5613	2.0076	0.0446854	NA
ARHGAP11A	52.6565	1.2543	0.62528	2.00599	0.0448577	NA
LRBA	72.4527	1.16101	0.579036	2.00508	0.0449545	NA
LOC155060	9.37813	2.85729	1.42662	2.00284	0.0451945	NA
SNORA1	214.008	-2.26184	1.13149	-1.999	0.0456082	0.666848
TRPS1	65.3078	1.18511	0.593175	1.99791	0.0457263	NA
C2orf68	15.6581	-2.46542	1.23429	-1.99743	0.0457784	NA
CCP110	41.344	1.48271	0.743064	1.9954	0.0459994	NA
HMBS	31.1142	-1.73262	0.870288	-1.99085	0.0464971	NA
TERC	140.865	-2.15626	1.08436	-1.9885	0.0467561	0.678491
GOLGA1	37.487	-1.47741	0.744041	-1.98565	0.0470722	NA
TSPO	24.1946	-1.82019	0.917711	-1.9834	0.0473229	NA
WWP2	35.3828	-1.62815	0.822192	-1.98025	0.0476753	NA
DGCR6L	28.9794	-1.88048	0.949815	-1.97984	0.0477216	NA
FBXW11	19.5724	-1.97528	0.998156	-1.97893	0.0478241	NA
NEK2	48.7486	1.52536	0.770928	1.97861	0.0478602	NA
PLOD1	106.217	-1.06353	0.53761	-1.97825	0.0479	0.684803
FTX	120.246	1.12041	0.567224	1.97525	0.0482403	0.684803
CLSTN1	113.413	-1.05877	0.536054	-1.97511	0.0482556	0.684803
LOC100272228	7.34988	2.88282	1.46022	1.97424	0.0483544	NA
ZFPL1	17.8474	-2.22511	1.1277	-1.97315	0.0484788	NA
EXPH5	40.7878	2.11685	1.07389	1.97121	0.0487004	NA
NFYB	49.2237	1.18014	0.599322	1.96913	0.0489386	NA
ARHGAP11B	63.4599	1.37392	0.697809	1.96891	0.0489639	NA
NAPSA	5.85619	-5.4184	2.75443	-1.96716	0.0491651	NA
CCSAP	42.9087	1.2409	0.631299	1.96563	0.0493413	NA
ARVCF	24.7468	-2.17102	1.10494	-1.96483	0.0494341	NA

## Sheet: B- CCD33_DEseq result
Gene	baseMean	log2FoldChange	lfcSE	stat	pvalue	padj
ERBB2	2036.1	-8.39081	1.2047	-6.96504	3.28e-12	5.32e-09
CSDAP1	97.1107	-9.28673	1.97505	-4.70203	2.58e-06	0.00148737
SNORA9	1887.98	-6.34418	1.35319	-4.68833	2.75e-06	0.00148737
SCARNA16	1348.72	-6.16361	1.40548	-4.38543	1.16e-05	0.00360376
SNORA79	97.8658	-5.88376	1.34225	-4.38351	1.17e-05	0.00360376
SNORD17	953.421	-4.73967	1.0885	-4.35433	1.33e-05	0.00360376
SNORA38	694.271	-5.35749	1.2644	-4.23719	2.26e-05	0.00523807
SNORA50	918.375	-5.23019	1.28717	-4.06333	4.84e-05	0.00851491
SNORA71B	726.552	-4.85623	1.19808	-4.05334	5.05e-05	0.00851491
SNORA21	1808.73	-5.22499	1.29205	-4.04394	5.26e-05	0.00851491
RNU12	594.15	-4.74508	1.18453	-4.00587	6.18e-05	0.00910007
SCARNA18	1258.15	-5.29373	1.36443	-3.87981	0.000104538	0.0135258
SNORA46	454.039	-5.02312	1.29774	-3.87066	0.00010854	0.0135258
SNORA28	2374.88	-5.25453	1.39282	-3.77257	0.000161575	0.0180895
SNORA27	1394.41	-4.8124	1.28051	-3.7582	0.00017114	0.0180895
SNORA75	835.595	-4.90709	1.30946	-3.74742	0.000178661	0.0180895
SNORA23	3108.45	-4.6397	1.26916	-3.65573	0.000256452	0.0244384
SNORD15B	1423.23	-3.97787	1.09747	-3.62459	0.000289415	0.0260473
SNORA19	149	-4.70056	1.33233	-3.52807	0.000418594	0.0343206
SNORA24	2281.72	-4.38068	1.2428	-3.52486	0.000423711	0.0343206
SNORA74A	1602.73	-5.11343	1.4889	-3.43436	0.000593954	0.0458193
SNORD15A	462.805	-4.20308	1.23004	-3.41702	0.000633102	0.0466193
SNORA68	1453.19	-4.07112	1.20321	-3.38356	0.000715523	0.0503977
SNORD94	140.378	-3.89129	1.15455	-3.3704	0.000750585	0.0506645
SCARNA14	19.7967	-4.62417	1.37626	-3.35996	0.000779547	NA
SNORA62	313.882	-4.45149	1.33311	-3.33917	0.000840282	0.054311
SNORA81	416.812	-3.81881	1.14714	-3.32898	0.000871659	0.054311
NRIP1	476.207	-3.90186	1.18153	-3.30237	0.000958699	0.0573101
SNORA41	79.4169	-3.98347	1.20712	-3.29997	0.000966936	NA
SNORA8	7621.67	-3.44645	1.0471	-3.29142	0.000996828	0.0573101
SNORA16A	2328.84	-4.23687	1.29279	-3.27732	0.00104798	0.0573101
SNORA63	14414.7	-3.81045	1.17226	-3.2505	0.00115201	0.0573101
SNORA34	546.46	-3.66636	1.12804	-3.2502	0.00115322	0.0573101
SNORA43	2351.45	-4.53423	1.3973	-3.245	0.0011745	0.0573101
CCDC134	106.334	-3.57042	1.10131	-3.24198	0.00118702	0.0573101
SNORA2A	118.322	-3.90172	1.2049	-3.23821	0.0012028	0.0573101
SNORA48	165.005	-4.36644	1.3536	-3.22579	0.00125627	0.0581472
SNORA71D	1506.23	-4.05077	1.27078	-3.18762	0.00143449	0.0642412
L3MBTL4	11.1797	-6.32828	1.98738	-3.18424	0.00145137	NA
SNORA65	870.808	-4.02829	1.26633	-3.18109	0.00146724	0.0642412
MAGEA4	16.6035	-7.57527	2.39116	-3.16803	0.00153473	NA
SLC22A25	8.65327	-6.69366	2.12416	-3.1512	0.00162599	NA
SNORA6	329.028	-3.98789	1.28321	-3.10775	0.00188515	0.0803668
SCARNA3	93.178	-2.71734	0.883598	-3.07531	0.00210281	0.0863515
SNORA42	125.34	-3.80059	1.2375	-3.07118	0.00213214	0.0863515
SNORA52	481.135	-3.86466	1.26299	-3.05992	0.00221393	0.0874771
SNORA5A	1276.59	-3.38715	1.1113	-3.04791	0.00230441	0.0888843
SCARNA10	340.212	-2.97352	0.981	-3.03111	0.00243655	0.0917957
SNORA53	5995.6	-3.48197	1.15757	-3.008	0.00262973	0.0968218
SNORA2B	34.6347	-3.70926	1.23339	-3.00738	0.00263506	NA
LOC150185	21.1885	-5.91707	1.98679	-2.97821	0.00289936	NA
UBE3A	103.494	-2.28412	0.768781	-2.97109	0.00296744	0.106131
SNORA12	528.923	-2.68611	0.905911	-2.96509	0.00302594	0.106131
SNORA5C	89.1036	-3.03325	1.02484	-2.95973	0.00307911	0.106131
FLJ40194	13.0125	-7.19763	2.45198	-2.93543	0.00333082	NA
OR5J2	5.91198	-5.06616	1.72875	-2.93053	0.00338388	NA
ZNF770	14.4875	-7.04173	2.42456	-2.90433	0.00368037	NA
SNORA14B	88.7396	-3.26758	1.12572	-2.90265	0.00370024	NA
SCARNA13	206.281	-2.03132	0.700844	-2.89839	0.00375086	0.126592
SNORA77	33.1134	-3.98133	1.38412	-2.87643	0.00402203	NA
TMEM174	6.93256	-5.82657	2.03535	-2.86269	0.00420068	NA
SNORA71A	852.304	-3.89656	1.36948	-2.84528	0.00443727	0.146702
ENTPD3	12.2986	-7.13149	2.57547	-2.76901	0.00562276	NA
MICAL3	45.6168	-3.23395	1.17974	-2.74124	0.00612075	NA
ZNF124	82.4533	-2.942	1.07338	-2.74089	0.00612735	NA
SNORA66	274.441	-2.85288	1.04274	-2.73595	0.00621998	0.200383
SNORA1	159.724	-3.34104	1.22324	-2.73131	0.00630836	0.200383
TSNARE1	30.7568	-3.43277	1.25775	-2.7293	0.00634694	NA
LINC00638	27.0936	-4.85921	1.79689	-2.70423	0.00684629	NA
CDRT15L2	6.72083	-4.79042	1.79143	-2.67407	0.00749364	NA
TMEM150B	13.7881	-5.65768	2.14662	-2.63562	0.00839826	NA
SNORA84	405.612	-3.30228	1.26623	-2.60796	0.00910828	0.283758
SNORA70	1919.08	-2.45188	0.944239	-2.59667	0.00941317	0.285372
URI1	242.175	-2.11494	0.815613	-2.59307	0.00951241	0.285372
WBP4	32.8955	2.46772	0.95702	2.57855	0.0099217	NA
RMRP	37093.3	-3.50073	1.36131	-2.57158	0.0101235	0.298182
SNORA14A	77.0732	-3.23931	1.26352	-2.56372	0.0103558	NA
ZNF551	27.0543	-3.43552	1.34037	-2.56311	0.0103738	NA
C12orf52	29.9722	-2.97283	1.17461	-2.53092	0.0113763	NA
C20orf26	7.63499	-6.40075	2.54348	-2.51653	0.0118517	NA
KANSL1-AS1	20.8531	-3.64023	1.44907	-2.51211	0.012001	NA
SNORA31	876.456	-3.05758	1.21961	-2.50702	0.0121752	0.352212
MEMO1	190.707	-2.14762	0.86073	-2.49511	0.0125919	0.357874
OR5D14	9.59844	-3.61223	1.45545	-2.48187	0.0130696	NA
LOC158376	21.7077	-4.60868	1.87931	-2.45233	0.0141936	NA
SLC9A3R1	39.2801	-1.86398	0.760895	-2.44973	0.0142965	NA
SNORA74B	43.2204	-2.73266	1.12546	-2.42804	0.0151806	NA
LOC100128822	11.5636	-4.07824	1.68356	-2.42239	0.015419	NA
IKBKB	67.2289	-1.97632	0.817063	-2.41881	0.0155716	NA
PLIN5	14.5126	-7.29791	3.01719	-2.41878	0.0155726	NA
DCDC5	6.85952	-6.27016	2.5981	-2.41337	0.0158059	NA
ZNF22	20.2649	-2.55914	1.07225	-2.3867	0.0170002	NA
EPM2AIP1	10.9209	-3.40347	1.43095	-2.37847	0.0173844	NA
ALDH1B1	13.5234	-3.41839	1.43773	-2.37762	0.0174248	NA
SNORA36A	20.3053	-3.27956	1.38239	-2.37238	0.017674	NA
SNORA49	626.206	-1.81514	0.769397	-2.35917	0.0183157	0.511575
NOL3	31.9038	-3.60383	1.54775	-2.32844	0.0198887	NA
RPPH1	36553.3	-3.19659	1.37907	-2.31794	0.0204527	0.561582
FKBP1AP1	16.8363	-4.7836	2.07002	-2.31089	0.0208389	NA
SCARNA7	1031.01	-1.64452	0.711841	-2.31023	0.0208753	0.563633
SNORA57	51.2539	-3.18579	1.38482	-2.30051	0.0214192	NA
LZIC	54.359	-1.7735	0.785149	-2.2588	0.0238956	NA
FHL2	230.634	1.26349	0.561754	2.24918	0.024501	0.650683
ZNF831	8.71528	-4.3329	1.94705	-2.22536	0.0260568	NA
FUK	28.7655	-3.35932	1.51126	-2.22286	0.0262256	NA
SCARNA6	41.8626	-2.60321	1.1749	-2.21569	0.026713	NA
C12orf61	5.67565	5.03187	2.28293	2.20413	0.0275151	NA
ZIM3	3.36277	-5.20813	2.37685	-2.19119	0.0284382	NA
ZAR1	5.24701	-5.8562	2.67614	-2.1883	0.0286478	NA
MAP2K1	87.0469	-1.95227	0.89742	-2.17543	0.029598	NA
ACTR3B	5.70626	-3.85098	1.78062	-2.16272	0.0305625	NA
EGLN1	77.2471	-1.46674	0.678278	-2.16244	0.0305839	NA
FFAR1	5.11687	-5.45053	2.52805	-2.15602	0.0310822	NA
TAF5	10.6948	3.18825	1.48194	2.1514	0.0314446	NA
MITD1	69.9649	-1.57445	0.734405	-2.14385	0.0320449	NA
LOC100507547	11.5162	3.64676	1.70138	2.14342	0.0320796	NA
AQP7	5.1078	-4.45165	2.08339	-2.13673	0.0326199	NA
DEFA10P	4.92451	-5.75641	2.69925	-2.13259	0.032958	NA
C8orf37	10.3843	3.15956	1.48382	2.12934	0.0332258	NA
HSH2D	15.2544	-3.19657	1.52247	-2.09959	0.0357647	NA
RANBP17	93.6293	-1.81882	0.86912	-2.09272	0.0363745	0.944878
HMGXB4	86.4271	-2.08821	0.999447	-2.08936	0.0366752	NA
ARHGEF4	2.50411	-4.84366	2.31853	-2.08911	0.0366975	NA
PSAT1	378.749	1.09912	0.526631	2.08708	0.0368811	0.944878
RILPL1	21.9398	3.04953	1.4636	2.08359	0.0371977	NA
TMEM181	212.801	-1.76943	0.849808	-2.08215	0.0373285	0.944878
C9orf171	4.88102	-5.75722	2.76672	-2.08089	0.0374444	NA
KIAA0408	6.72821	-3.82229	1.84096	-2.07625	0.037871	NA
PRDM15	12.1299	-2.20204	1.0606	-2.07622	0.0378738	NA
RPS14	26.5573	-2.13734	1.03493	-2.0652	0.0389038	NA
ZNF782	56.2211	-2.13707	1.04052	-2.05384	0.0399913	NA
TIMM13	51.5452	-1.88968	0.922926	-2.04749	0.04061	NA
SNORA39	5.82381	-3.48438	1.70261	-2.04649	0.0407081	NA
FAM195A	5.23545	-4.1763	2.04299	-2.04421	0.0409323	NA
PPP4R4	6.15527	4.58753	2.24689	2.04172	0.0411792	NA
ASUN	65.0105	1.78405	0.875699	2.03729	0.0416212	NA
SH2D3A	78.1225	-2.74294	1.3495	-2.03257	0.0420964	NA
SNHG4	349.993	-2.66119	1.31068	-2.03038	0.0423176	0.999103
SNHG3	6.87087	-4.4991	2.22317	-2.02373	0.0429975	NA
DPM3	4.40492	-4.47902	2.21368	-2.02334	0.0430385	NA
HDGFL1	3.89709	-4.17571	2.06388	-2.02323	0.0430496	NA
APITD1	9.58596	-2.61554	1.29773	-2.01546	0.0438562	NA
PET112	24.0387	2.46299	1.2236	2.01291	0.0441246	NA
ALDH3A2	8.03609	3.76503	1.87307	2.01009	0.0444218	NA
WDR46	12.9059	-2.41033	1.20114	-2.00671	0.0447809	NA
NPSR1-AS1	4.2795	-5.53278	2.75728	-2.00661	0.0447914	NA
CXCL16	16.9327	2.31917	1.16389	1.9926	0.0463054	NA
SCARNA2	9.44621	-2.95404	1.48315	-1.99173	0.0464006	NA
PRG1	4.32826	-3.76593	1.89149	-1.99098	0.0464826	NA
LSM6	14.2005	-2.25166	1.13534	-1.98325	0.0473391	NA
CUZD1	6.24541	-4.85018	2.44623	-1.98272	0.047399	NA
C7orf61	4.10588	-5.10262	2.57634	-1.98057	0.0476398	NA
LOC100506083	7.49878	-4.17853	2.11012	-1.98023	0.0476776	NA
SORL1	25.4915	-1.73024	0.874093	-1.97947	0.047763	NA
LPAR2	23.7751	-3.14445	1.59038	-1.97717	0.0480223	NA
IL15RA	74.3386	-3.04286	1.53909	-1.97705	0.0480364	NA
SNORA64	2370.37	-2.1973	1.11178	-1.97637	0.0481128	0.999103
ZNF273	19.4823	-2.17959	1.106	-1.9707	0.0487586	NA
SOGA2	112.928	-1.68463	0.85802	-1.96339	0.0496006	0.999103
TMCO7	27.222	-2.1549	1.09897	-1.96083	0.0498985	NA

## Sheet: C- HCT116_DEseq result
Gene	baseMean	log2FoldChange	lfcSE	stat	pvalue	padj
TMEM132A	128.992	2.33345	0.393975	5.92285	3.16e-09	2.6e-05
ERBB2	405.418	-3.014	0.5201	-5.79504	6.83e-09	2.8e-05
SNORA14B	87.5902	-2.79019	0.542427	-5.1439	2.69e-07	0.000736346
NBN	363.67	-1.30433	0.265854	-4.90618	9.29e-07	0.0015842
CHPF	667.541	1.89702	0.387253	4.89866	9.65e-07	0.0015842
SHC4	576.316	9.98157	2.14692	4.64924	3.33e-06	0.0040924
CIR1	248.385	-1.62784	0.351376	-4.63274	3.61e-06	0.0040924
SLC52A2	117.753	1.49917	0.326413	4.59288	4.37e-06	0.0040924
MOGS	81.6473	1.70537	0.37299	4.57218	4.83e-06	0.0040924
ESF1	211.055	-1.54109	0.337559	-4.56541	4.99e-06	0.0040924
SAMD9	73.0988	-2.41375	0.537736	-4.48873	7.16e-06	0.00531005
SLC4A2	126.436	1.46251	0.328014	4.45869	8.25e-06	0.00531005
MEN1	174.527	1.48476	0.333317	4.45449	8.41e-06	0.00531005
FDXR	91.368	1.57297	0.356202	4.41594	1.01e-05	0.00589704
GNL1	205.765	1.7053	0.390843	4.36312	1.28e-05	0.00661122
ERGIC2	417.162	-1.23594	0.283341	-4.36204	1.29e-05	0.00661122
PCNXL3	128.72	1.46743	0.337679	4.34563	1.39e-05	0.00670596
CLGN	106.8	-2.21631	0.516589	-4.29027	1.78e-05	0.00804789
THOC2	578.777	-1.2585	0.294638	-4.27134	1.94e-05	0.00804789
EMC10	122.952	1.39132	0.325889	4.26931	1.96e-05	0.00804789
FLNA	471.247	1.07351	0.252329	4.25443	2.1e-05	0.00811844
MORC3	308.467	-1.43091	0.337718	-4.23701	2.27e-05	0.00811844
CWC27	372.189	-1.37507	0.325755	-4.22117	2.43e-05	0.00811844
LYSMD3	100.05	-1.66503	0.395971	-4.20493	2.61e-05	0.00811844
ZNF354A	63.6003	-1.8309	0.436451	-4.19496	2.73e-05	0.00811844
SNORA31	379.994	-1.78646	0.426527	-4.18838	2.81e-05	0.00811844
MTRF1L	157.453	-1.58015	0.377542	-4.18536	2.85e-05	0.00811844
TP53	332.005	1.10575	0.264403	4.18204	2.89e-05	0.00811844
CLIP1	152.446	-1.50769	0.361001	-4.17643	2.96e-05	0.00811844
FAM133B	164.856	-1.43737	0.344596	-4.17118	3.03e-05	0.00811844
SKP1	326.702	1.23641	0.296605	4.16852	3.07e-05	0.00811844
NOC2L	125.105	1.48645	0.361095	4.1165	3.85e-05	0.00986778
TTC18	113.517	-1.96332	0.47821	-4.10557	4.03e-05	0.010033
CKB	378.84	1.73861	0.426356	4.07783	4.55e-05	0.0109754
FAM135A	238.519	-1.51512	0.373017	-4.06179	4.87e-05	0.0112415
ZNF354B	47.3468	-2.25137	0.554672	-4.05893	4.93e-05	0.0112415
FLJ23867	166.355	1.31724	0.32545	4.04745	5.18e-05	0.0114073
MXD4	73.977	1.70623	0.422036	4.04285	5.28e-05	0.0114073
SPDL1	104.917	-1.88579	0.472785	-3.98869	6.64e-05	0.013385
SLC25A11	162.307	1.24137	0.311247	3.98838	6.65e-05	0.013385
ZC3H15	326.602	-1.16551	0.292312	-3.98722	6.69e-05	0.013385
SREK1	308.242	-1.29657	0.326111	-3.97586	7.01e-05	0.0137064
TK1	130.373	1.56096	0.393841	3.96342	7.39e-05	0.013709
SCARB2	172.691	-1.19218	0.301433	-3.95506	7.65e-05	0.013709
PITPNM1	59.7986	1.72979	0.437375	3.95492	7.66e-05	0.013709
CDIPT	128.828	1.68542	0.42659	3.95091	7.79e-05	0.013709
VRK2	401.711	-1.31647	0.33337	-3.94896	7.85e-05	0.013709
PNN	612.125	-1.12658	0.286091	-3.93783	8.22e-05	0.0138532
CLDN4	268.902	1.12138	0.285185	3.9321	8.42e-05	0.0138532
ZNF121	512.389	-1.21058	0.307908	-3.93161	8.44e-05	0.0138532
LUC7L3	774.731	-1.3059	0.333278	-3.91834	8.92e-05	0.0141379
NABP1	181.487	-1.32435	0.33808	-3.91727	8.96e-05	0.0141379
NCAPD2	154.177	1.37558	0.351579	3.91257	9.13e-05	0.0141442
PLBD2	115.274	1.38959	0.35611	3.90213	9.54e-05	0.014495
C10orf118	317.871	-1.39931	0.360283	-3.88392	0.000102785	0.0148209
TDRD3	214.917	-1.40893	0.362897	-3.88244	0.000103412	0.0148209
ZNF277	201.638	-1.57881	0.406842	-3.88066	0.000104173	0.0148209
SCFD1	416.412	-1.30719	0.337191	-3.87672	0.000105873	0.0148209
RPAP2	121.512	-1.35935	0.351286	-3.86964	0.000108998	0.0148209
ZZZ3	216.446	-1.42139	0.36777	-3.8649	0.000111136	0.0148209
SUV420H1	303.411	-1.34203	0.34724	-3.86486	0.000111152	0.0148209
BRAT1	82.6776	1.63329	0.423414	3.85744	0.000114582	0.0148209
PIBF1	74.3105	-1.86232	0.483471	-3.85197	0.000117172	0.0148209
TMEM106B	284.278	-1.19722	0.310828	-3.8517	0.000117302	0.0148209
SREK1IP1	328.731	-2.00061	0.519424	-3.85159	0.000117354	0.0148209
NKTR	145.153	-1.52938	0.397491	-3.84759	0.000119287	0.0148367
ZNF280D	119.301	-1.63526	0.4256	-3.84224	0.000121915	0.0148573
ADAM15	311.839	1.36354	0.355096	3.83992	0.000123072	0.0148573
ZCRB1	213.991	-1.30658	0.340877	-3.83301	0.000126587	0.0150046
PELP1	153.686	1.33964	0.349742	3.83038	0.000127948	0.0150046
CTSD	361.089	1.07885	0.282614	3.8174	0.000134866	0.0155931
CCAR1	236.773	-1.26115	0.33083	-3.81209	0.000137799	0.015711
ANKRD18A	137.486	-1.33558	0.350958	-3.80554	0.000141497	0.0159116
MKI67IP	590.792	-1.04063	0.274713	-3.78806	0.00015183	0.0168428
DDX60L	381.421	-1.09689	0.289852	-3.78429	0.000154147	0.0168585
SLC16A3	473.828	1.30665	0.345692	3.77981	0.000156948	0.0168585
KIAA1731	72.5467	-1.61361	0.427941	-3.77064	0.000162832	0.0168585
CLPX	315.692	-1.26895	0.336547	-3.77048	0.000162934	0.0168585
RAB1B	395.428	1.23208	0.326877	3.76924	0.000163743	0.0168585
ARID4B	163.756	-1.27796	0.339126	-3.76841	0.000164293	0.0168585
CCDC59	175.678	-1.31287	0.349997	-3.75108	0.000176073	0.0178442
AHI1	200.172	-1.19914	0.321802	-3.72634	0.000194284	0.0192218
ZMYM3	96.282	1.40638	0.377668	3.72387	0.000196195	0.0192218
PDCD10	456.34	-1.04676	0.281143	-3.72323	0.00019669	0.0192218
ZC3H13	597.264	-1.30709	0.352423	-3.70886	0.000208196	0.0199623
PPIL4	272.409	-1.24107	0.334727	-3.70772	0.000209131	0.0199623
PHF20L1	231.974	-1.39441	0.379294	-3.67635	0.000236599	0.0223246
B4GALT5	249.909	1.22131	0.333956	3.65709	0.000255092	0.02335
UACA	300.51	-1.31796	0.360504	-3.65589	0.000256294	0.02335
FAM83H	157.813	1.132	0.309852	3.65336	0.000258826	0.02335
TTC33	78.623	-1.53326	0.419687	-3.65335	0.000258844	0.02335
MED25	109.581	1.27818	0.350429	3.64747	0.000264838	0.0234071
RNF187	256.414	1.2959	0.35532	3.64714	0.00026518	0.0234071
FAM111A	182.257	-1.21641	0.333994	-3.642	0.000270529	0.0236253
ATP6V0A1	164.633	1.50628	0.413933	3.63895	0.000273749	0.0236548
KIF16B	91.6578	-1.48643	0.41064	-3.6198	0.00029483	0.0252105
RSRC2	186.874	-1.33987	0.370794	-3.61351	0.000302079	0.0252105
UPF3A	164.684	-1.34634	0.37293	-3.61018	0.000305989	0.0252105
SRSF10	204.649	-1.11553	0.309022	-3.60987	0.000306353	0.0252105
LPPR2	44.4704	1.69689	0.471029	3.60251	0.00031516	0.0252105
SNORA10	391.578	-1.29738	0.360151	-3.60232	0.000315388	0.0252105
CLINT1	310.585	-1.02643	0.285241	-3.59845	0.00032012	0.0252105
NRIP1	250.187	1.16033	0.322456	3.59841	0.000320171	0.0252105
ASNA1	162.153	1.24067	0.345287	3.59315	0.0003267	0.0252105
GLT25D1	252.637	1.12221	0.312356	3.59273	0.000327229	0.0252105
LINC00641	217.458	-1.46105	0.406772	-3.59182	0.000328377	0.0252105
NEDD1	72.8066	-1.5341	0.427132	-3.59164	0.000328606	0.0252105
MCPH1	182.225	-1.13938	0.317529	-3.58828	0.000332868	0.025301
SKIL	224.1	-1.13979	0.317857	-3.58587	0.00033596	0.0253018
CDC42BPG	56.7415	1.53936	0.431064	3.57106	0.000355535	0.0265326
CEP57	207.829	-1.14807	0.322563	-3.55919	0.000371994	0.0270992
PRPF40A	290.475	-1.10487	0.310551	-3.55776	0.000374024	0.0270992
DPM1	436.023	-0.955903	0.268702	-3.55749	0.000374421	0.0270992
SLC35C2	150.767	1.15245	0.324072	3.55615	0.000376332	0.0270992
CD97	260.711	1.05025	0.296539	3.54169	0.000397573	0.0283798
UPF3B	494.181	-2.03147	0.575772	-3.52825	0.000418315	0.0293466
ECD	216.845	-1.1021	0.312403	-3.5278	0.000419028	0.0293466
SCAMP4	163.556	1.3408	0.380258	3.52603	0.000421842	0.0293466
NAB1	311.099	-1.19059	0.338194	-3.52043	0.000430845	0.0295152
TRIM33	135.831	-1.14841	0.326247	-3.52006	0.000431456	0.0295152
C5orf24	284.445	-1.24841	0.355749	-3.50923	0.000449412	0.0304895
NUCB1	310.94	1.01551	0.290238	3.49889	0.000467205	0.0314368
GCLM	144.66	-1.12328	0.321306	-3.49597	0.000472333	0.0315235
KIAA1143	255.512	-1.03086	0.295339	-3.49043	0.000482242	0.0319252
COPS2	728.957	-0.887347	0.254711	-3.48374	0.000494462	0.0324723
KIAA2026	49.8257	-1.75046	0.502913	-3.48064	0.00050022	0.0325898
RIOK3	230.805	-1.14876	0.330658	-3.47416	0.000512458	0.0330667
CCNL1	297.837	-1.05589	0.304071	-3.47252	0.000515597	0.0330667
GRN	194.912	1.27131	0.366854	3.46544	0.00052936	0.0335364
SNORA14A	26.3372	-2.51207	0.725071	-3.46459	0.000531046	NA
DNAJC21	188.236	-1.21664	0.351311	-3.46315	0.000533887	0.0335364
NEMF	137.706	-1.32277	0.382026	-3.4625	0.000535178	0.0335364
THOC7	334.469	-1.01918	0.295051	-3.45426	0.000551797	0.0340915
NHLRC2	148.202	-1.16291	0.336685	-3.454	0.000552341	0.0340915
SH3GL1	259.787	0.900112	0.261159	3.44661	0.000567676	0.0344305
ZDBF2	140.296	-1.41184	0.409677	-3.44622	0.000568487	0.0344305
LOC732275	8.61085	-5.84233	1.69539	-3.44601	0.000568939	NA
LSM7	175.066	1.07731	0.31269	3.4453	0.000570416	0.0344305
JAG2	83.2305	1.16368	0.338539	3.43736	0.000587412	0.0351976
LOC100506123	46.8251	-1.97574	0.575752	-3.43157	0.000600091	0.0355028
FAM134A	128.346	1.1828	0.344843	3.42995	0.000603693	0.0355028
CERK	227.188	0.939901	0.274169	3.42818	0.000607633	0.0355028
LLGL1	46.8379	1.53817	0.44881	3.42722	0.000609806	0.0355028
HSPBP1	100.936	1.14259	0.333663	3.42437	0.000616215	0.0356233
JOSD2	28.8004	1.93338	0.565105	3.42127	0.000623301	NA
S100A4	398.046	1.44587	0.422835	3.41947	0.000627427	0.0360178
MFGE8	228.155	1.32902	0.389056	3.41601	0.000635462	0.0362257
ABCD3	141.591	-1.18826	0.348537	-3.40928	0.000651348	0.0367399
N4BP2L2	139.035	-1.65632	0.486056	-3.40767	0.000655203	0.0367399
UPF2	171.694	-1.10217	0.323544	-3.40654	0.000657907	0.0367399
ZUFSP	155.681	-1.38884	0.408011	-3.40393	0.000664241	0.0368429
TAS2R14	69.3884	-1.72765	0.508169	-3.39975	0.000674475	0.0371595
KLRAP1	29.8086	-2.23971	0.659378	-3.3967	0.000682043	0.037326
DAPP1	26.5355	-2.17565	0.640663	-3.39594	0.000683936	NA
SYMPK	533.193	1.04265	0.307589	3.38975	0.000699552	0.0380306
DCTPP1	137.367	1.05559	0.311831	3.38512	0.000711484	0.0381815
POLD1	30.9234	1.64792	0.487254	3.38206	0.000719441	0.0381815
DDR1	477.749	0.926595	0.273974	3.38206	0.00071945	0.0381815
POLR2L	266.639	1.10643	0.327626	3.3771	0.000732538	0.0381815
DCUN1D1	356.848	-1.12149	0.332131	-3.37665	0.000733741	0.0381815
PLA2G12A	237.058	-1.06594	0.315742	-3.37598	0.000735538	0.0381815
LRRC49	82.1949	-1.48463	0.439829	-3.37546	0.000736919	0.0381815
CBX6	43.6806	1.56837	0.464774	3.37449	0.000739537	0.0381815
KCNH3	35.5597	1.69408	0.502734	3.36973	0.000752412	0.0384876
TMC6	49.6506	1.56778	0.465447	3.36833	0.000756253	0.0384876
UNG	125.134	1.21443	0.36067	3.36714	0.000759531	0.0384876
EEF1D	725.634	1.14107	0.339136	3.36465	0.000766416	0.0385073
CNTNAP1	65.0542	1.77082	0.526696	3.36214	0.000773421	0.0385073
PYROXD1	147.46	-1.10717	0.329326	-3.36193	0.000773993	0.0385073
CCDC11	64.0685	-1.49022	0.443858	-3.35742	0.000786735	0.0389055
USP17L5	19.2039	-4.52895	1.3495	-3.35602	0.000790728	NA
EXPH5	88.5766	-1.58313	0.47262	-3.34969	0.000809032	0.0397685
DNAJB14	193.536	-1.22324	0.366167	-3.34066	0.000835804	0.04084
G6PC3	83.7086	1.39034	0.416543	3.3378	0.000844448	0.0410182
CBX2	27.8251	1.66631	0.499618	3.33517	0.000852465	NA
ERCC6L2	161.102	-1.11243	0.333746	-3.33316	0.000858649	0.0414626
NOL8	168.41	-1.30346	0.391309	-3.33103	0.000865241	0.0415366
SCARNA13	222.93	1.02675	0.308498	3.32824	0.000873978	0.0417121
SLK	445.247	-1.12756	0.339237	-3.32381	0.000887976	0.0419626
UBE2Q2P1	123.025	-1.46251	0.440071	-3.32334	0.000889451	0.0419626
IFIH1	201.938	-1.56535	0.471347	-3.32101	0.000896908	0.0420727
RPL7A	1568.48	0.922766	0.278249	3.31633	0.000912093	0.0425419
NANOG	30.5026	-2.68006	0.809693	-3.30997	0.000933055	0.0432737
TLK2	422.441	-1.08232	0.327974	-3.30001	0.00096681	0.0445873
RP9	122.137	-1.46003	0.442657	-3.29834	0.000972595	0.0446035
RBM41	92.5491	-1.51103	0.458541	-3.2953	0.000983166	0.0446607
DKK1	216.36	2.0652	0.626795	3.29486	0.000984723	0.0446607
FAM227B	116.45	-1.37601	0.418381	-3.28889	0.00100582	0.0452583
NUP54	138.495	-1.32729	0.403726	-3.2876	0.00101046	0.0452583
OR51Q1	176.329	-1.16054	0.353125	-3.28649	0.00101444	0.0452583
KLRK1	139.823	-1.72706	0.526176	-3.28228	0.0010297	0.0454559
TRNT1	94.8913	-1.26328	0.384886	-3.28222	0.00102994	0.0454559
NDUFAF7	125.272	-1.29755	0.39557	-3.28021	0.00103729	0.0455355
ELOF1	84.8519	1.35225	0.4142	3.26473	0.00109568	0.0475703
FKSG29	31.3541	-1.79751	0.550797	-3.26348	0.00110054	0.0475703
SMG1P1	1135.54	-1.18381	0.362761	-3.26335	0.00110103	0.0475703
CALM3	753.986	0.767542	0.235389	3.26074	0.00111121	0.0477586
TAF9B	32.9348	-1.7024	0.522427	-3.25864	0.00111946	0.0478112
WBSCR22	213.386	0.972177	0.298562	3.25619	0.00112916	0.0478112
LPCAT1	251.101	1.26591	0.388912	3.25501	0.00113389	0.0478112
CYP2S1	45.3533	1.52608	0.468905	3.25455	0.00113573	0.0478112
RUFY2	101.429	-1.47257	0.452764	-3.2524	0.00114435	0.0479286
ZCCHC10	95.9573	-1.41414	0.435681	-3.24582	0.00117111	0.0483743
ARL13B	56.0949	-1.53487	0.472917	-3.24553	0.00117231	0.0483743
RAB5A	448.836	-1.10084	0.339195	-3.24544	0.00117267	0.0483743
ELL2	436.665	-0.97034	0.299236	-3.24273	0.00118391	0.0484663
TBCK	159.771	-1.36841	0.422135	-3.24164	0.00118842	0.0484663
LRIF1	264.73	-1.95007	0.601755	-3.24064	0.00119262	0.0484663
BET1L	86.6904	1.19456	0.368969	3.23756	0.00120558	0.0486491
RUFY3	117.096	-1.66313	0.513827	-3.23676	0.00120897	0.0486491
LTBP4	171.648	0.939471	0.290464	3.23438	0.00121908	0.0486539
ATG2A	77.0942	1.18578	0.366901	3.23189	0.00122975	0.0486539
DAAM1	181.138	-1.52538	0.472122	-3.23091	0.00123396	0.0486539
ANAPC10	110.842	-1.15007	0.356001	-3.23053	0.00123562	0.0486539
DIS3L	84.1652	-1.33129	0.412187	-3.22981	0.00123872	0.0486539
ITGA5	154.92	1.27448	0.39477	3.22841	0.00124479	0.0486595
KIAA1257	43.306	-1.67577	0.520295	-3.22081	0.00127829	0.049732
H1F0	932.245	0.941308	0.29262	3.21683	0.00129617	0.0501129
THAP9-AS1	888.057	-0.99561	0.309588	-3.21592	0.00130028	0.0501129
RNF169	186.737	-1.04843	0.326175	-3.21432	0.00130756	0.0501576
AADAC	54.6283	-1.89992	0.591667	-3.21114	0.00132211	0.0502324
CCDC68	126.473	-1.3431	0.4184	-3.2101	0.0013269	0.0502324
SNORA38	204.484	1.11333	0.346845	3.20989	0.00132786	0.0502324
ALG12	56.9158	1.51576	0.472613	3.20718	0.00134042	0.0504749
BLZF1	271.885	-1.04404	0.32663	-3.1964	0.00139156	0.052047
BAZ2A	301.524	1.17658	0.368708	3.19109	0.00141738	0.052047
RWDD1	300.218	-1.08403	0.339763	-3.19055	0.00142	0.052047
ZCWPW2	34.185	-1.73177	0.542976	-3.18941	0.00142563	0.052047
SHKBP1	114.303	0.990959	0.310908	3.18731	0.00143605	0.052047
SEMA3F	12.0829	2.39675	0.752152	3.18652	0.00143996	NA
ZCCHC11	132.338	-1.20408	0.377891	-3.18633	0.00144091	0.052047
TAS2R19	41.5562	-1.79342	0.563091	-3.18496	0.00144775	0.052047
RALGAPA1	115.239	-1.23552	0.387973	-3.18455	0.00144982	0.052047
CNPPD1	165.529	1.02641	0.322522	3.18245	0.00146036	0.052047
SNAPC1	191.003	-1.11142	0.349292	-3.18194	0.00146294	0.052047
PTBP1	681.414	0.980057	0.308017	3.18182	0.00146351	0.052047
BRD9	248.02	-1.57709	0.495775	-3.18106	0.00146739	0.052047
NUP210	222.832	0.998502	0.313948	3.18047	0.00147036	0.052047
SCRIB	52.1144	1.54363	0.485362	3.18036	0.00147094	0.052047
RAD50	139.83	-1.1089	0.349081	-3.17662	0.00149001	0.0524956
PCF11	277.878	-1.30361	0.410567	-3.17515	0.00149758	0.0525368
CABLES1	37.7406	1.66507	0.524704	3.17334	0.00150695	0.0525397
SEZ6L2	255.725	1.12032	0.353117	3.17267	0.00151046	0.0525397
SLC25A39	215.43	0.954596	0.30132	3.16804	0.00153469	0.0530275
CTAGE9	41.8374	-1.57368	0.496817	-3.16753	0.0015374	0.0530275
GOLGA4	107.603	-1.61821	0.511438	-3.16404	0.00155594	0.053322
DTWD2	131.579	-1.36918	0.432965	-3.16233	0.00156513	0.053322
HLTF	430.116	-0.971182	0.307115	-3.16227	0.00156543	0.053322
VPS37A	66.4444	-1.32791	0.420473	-3.15812	0.00158789	0.0538634
SPRYD3	136.871	1.04398	0.330766	3.15625	0.0015981	0.0539454
RIT1	68.2808	-1.4301	0.453241	-3.15528	0.00160345	0.0539454
PFDN5	429.936	0.865414	0.274516	3.15252	0.0016187	0.0541617
CELSR2	30.8561	1.51848	0.481792	3.15173	0.00162307	0.0541617
ASF1A	173.076	-1.11224	0.353099	-3.14993	0.00163311	0.0542762
ANKRD26	76.673	-1.47305	0.468541	-3.14392	0.00166704	0.0551803
PIM3	207.656	0.84792	0.27038	3.13603	0.00171253	0.0564583
PI4KAP1	207.781	-1.22075	0.389418	-3.1348	0.00171972	0.0564688
KIAA1107	70.97	-1.56377	0.499342	-3.13166	0.00173823	0.056849
MED7	91.7114	-1.35763	0.43428	-3.12616	0.00177107	0.0576933
MTDH	472.833	-0.885815	0.283605	-3.12341	0.0017877	0.0580049
PPP2R5C	118.974	-1.04925	0.336452	-3.11857	0.00181729	0.0580455
ATG5	188.511	-1.02745	0.329572	-3.11753	0.00182374	0.0580455
PFN1P2	112.453	-1.36587	0.438142	-3.11742	0.0018244	0.0580455
EIF3J	156.18	-0.992755	0.31848	-3.11717	0.00182599	0.0580455
RAB11B	358.102	0.840765	0.269867	3.11548	0.00183644	0.0580455
SCAMP2	188.52	1.20971	0.38832	3.11524	0.00183797	0.0580455
PPP4R2	414.176	-0.79736	0.255961	-3.11516	0.00183845	0.0580455
DAB2IP	81.5363	1.24522	0.4008	3.10683	0.00189105	0.0589894
SNX4	93.5131	-1.43485	0.461852	-3.10673	0.00189168	0.0589894
LIG4	46.2769	-1.5495	0.498901	-3.10583	0.00189745	0.0589894
JHDM1D	206.505	-1.02757	0.330894	-3.10543	0.00190002	0.0589894
RNPC3	115.882	-1.22687	0.395465	-3.10234	0.00191997	0.0589894
SRGAP1	94.1294	-1.1248	0.362731	-3.10093	0.00192917	0.0589894
MYADM	178.967	1.25142	0.403599	3.10065	0.00193095	0.0589894
PSMD6	194.679	-0.953455	0.307574	-3.09992	0.00193572	0.0589894
MAGEB2	252.882	0.945429	0.305151	3.09823	0.00194677	0.0589894
UBA1	469.13	0.919747	0.296905	3.09778	0.00194973	0.0589894
ESRRA	23.239	1.75898	0.567955	3.09705	0.00195458	NA
OR52D1	246.856	-1.31862	0.425774	-3.097	0.00195489	0.0589894
BDP1	134.495	-1.27324	0.41113	-3.09693	0.00195538	0.0589894
INTS1	37.371	1.78805	0.577541	3.09596	0.00196176	0.0589894
IL27RA	39.4303	1.45889	0.471798	3.0922	0.00198679	0.0595056
POM121C	233.901	1.18759	0.384181	3.09121	0.00199343	0.0595056
PCNAP1	8.97596	-4.97596	1.61175	-3.0873	0.00201981	NA
PAK1IP1	135.042	-1.21123	0.392525	-3.08574	0.00203044	0.0603907
ZDHHC16	90.5379	1.37987	0.44745	3.08384	0.00204346	0.0605588
CNNM3	152.759	1.24675	0.404621	3.08128	0.00206114	0.060863
PPIG	115.883	-1.31807	0.428414	-3.07662	0.00209363	0.0616008
GOSR1	143.288	-1.22677	0.398972	-3.07483	0.00210621	0.0617495
TBC1D10B	73.958	1.10229	0.358727	3.07279	0.00212069	0.0619528
RAB11FIP2	156.362	-1.17162	0.382497	-3.06308	0.00219069	0.0637569
KIAA1009	31.961	-1.82196	0.595008	-3.06208	0.00219804	0.0637569
COBLL1	44.84	-1.54261	0.504013	-3.06066	0.00220847	0.0637569
KIAA1109	278.864	-1.05868	0.345976	-3.05998	0.00221351	0.0637569
PKN2	340.717	-0.947744	0.310171	-3.05555	0.00224647	0.0641221
YWHAG	124.576	-1.03296	0.338079	-3.05536	0.00224787	0.0641221
CNPY3	304.546	0.814981	0.266758	3.05513	0.00224962	0.0641221
PDE4A	63.7187	1.28672	0.42145	3.05307	0.00226509	0.0641647
ZDHHC7	85.4709	1.5024	0.492129	3.05286	0.00226675	0.0641647
ABCA11P	231.539	-1.01758	0.333619	-3.05013	0.00228741	0.0643593
SNORA66	261.534	-1.22545	0.401802	-3.04988	0.00228931	0.0643593
CD320	63.0002	1.26862	0.416152	3.04846	0.00230016	0.0644438
APRT	435.41	0.908678	0.2982	3.04721	0.00230975	0.0644924
SHMT1	71.3383	1.32446	0.435408	3.04188	0.00235108	0.0652289
CTBP1	250.347	0.800232	0.263105	3.04149	0.0023541	0.0652289
USP16	151.182	-1.16114	0.38186	-3.04074	0.00235997	0.0652289
USP17L2	8.3036	-4.74535	1.56194	-3.03811	0.00238064	NA
CWC15	234.424	-0.874937	0.288297	-3.03484	0.0024066	0.0661249
PARD6B	231.262	-0.929038	0.306249	-3.03361	0.0024165	0.0661249
2022-03-05	254.377	-0.829209	0.273341	-3.0336	0.00241655	0.0661249
PAFAH1B2	284.809	1.09682	0.361917	3.03059	0.00244076	0.0664525
GPBP1	336.941	-0.842539	0.278142	-3.02917	0.0024523	0.0664525
EMC2	113.945	-1.05314	0.347675	-3.0291	0.00245281	0.0664525
SLC25A23	182.014	0.927964	0.30651	3.02752	0.00246572	0.0665556
NMI	71.8282	-1.23443	0.407866	-3.02656	0.00247355	0.0665556
UGGT2	65.4309	-1.46711	0.485038	-3.02474	0.00248848	0.0665556
VPS36	191.551	-0.928593	0.307047	-3.02427	0.00249235	0.0665556
LRRFIP1	827.23	-0.90673	0.299876	-3.02369	0.00249715	0.0665556
FAM76B	65.0965	-1.30358	0.431515	-3.02095	0.00251986	0.0665874
C6orf228	68.8467	-1.17326	0.388376	-3.02094	0.00251991	0.0665874
NPC2	123.448	1.33734	0.442813	3.0201	0.00252688	0.0665874
EVPL	107.449	0.994207	0.329247	3.01964	0.00253079	0.0665874
CRLF1	48.3436	1.24573	0.412942	3.01672	0.00255526	0.0669964
PHF6	290.248	-1.20181	0.398611	-3.015	0.00256978	0.0669964
ZNF644	66.4262	-1.35661	0.450153	-3.01366	0.0025812	0.0669964
MIS18BP1	157.128	-1.37812	0.457416	-3.01283	0.00258821	0.0669964
CMSS1	462.954	-0.932486	0.30957	-3.0122	0.00259362	0.0669964
ZNF449	45.414	-1.75148	0.5815	-3.012	0.00259531	0.0669964
BCAP29	174.233	-1.13037	0.375565	-3.00978	0.00261436	0.0672767
CEBPZ	120.18	-1.1172	0.371368	-3.00834	0.00262679	0.0673155
USP47	123.363	-1.06296	0.353411	-3.00771	0.00263227	0.0673155
TRIM28	862.863	0.795387	0.264651	3.00542	0.00265216	0.0674577
COPG1	401.411	0.74694	0.248551	3.00518	0.00265426	0.0674577
SLC29A1	117.243	1.31305	0.43721	3.00324	0.00267121	0.0675958
POLK	62.3066	-1.37174	0.456838	-3.00268	0.00267616	0.0675958
SCARNA3	88.1645	1.02893	0.342793	3.0016	0.00268564	0.0676271
TMEM147	174.611	1.01204	0.337522	2.99844	0.00271369	0.0681056
DMPK	72.0156	1.06966	0.356841	2.99759	0.00272124	0.0681056
HIST1H3B	431.645	0.996893	0.33292	2.99439	0.00274994	0.0683017
PPP1R12A	128.682	-1.18843	0.396964	-2.9938	0.00275527	0.0683017
DAK	137.12	1.03628	0.346163	2.9936	0.00275707	0.0683017
COIL	215.642	-0.925255	0.309172	-2.99269	0.00276535	0.0683017
CHD9	112.792	-1.29658	0.433452	-2.99128	0.00277808	0.0683017
NDUFAF2	675.038	-1.22679	0.410136	-2.99118	0.002779	0.0683017
APEH	172.494	0.955983	0.31976	2.98969	0.00279262	0.0684317
HDAC5	71.6239	1.04966	0.351206	2.98872	0.00280148	0.0684446
APOOL	76.5556	-1.4227	0.476317	-2.98687	0.00281846	0.0686121
AGAP5	69.7294	-1.45599	0.487711	-2.98536	0.00283244	0.0686121
IFI30	297.808	1.46075	0.489322	2.98526	0.00283341	0.0686121
ABCA3	31.4864	1.74049	0.583463	2.98304	0.00285402	0.0689077
RAB4B	34.2864	1.47113	0.493612	2.98034	0.0028793	0.0691572
ZFC3H1	89.046	-1.27688	0.428466	-2.98011	0.00288142	0.0691572
TRIM47	52.6476	1.28284	0.430593	2.97924	0.00288962	0.0691572
REC8	47.5485	-1.34373	0.451188	-2.9782	0.00289947	0.0691609
TLN1	105.121	1.06715	0.358411	2.97744	0.00290663	0.0691609
MMS19	135.792	1.02436	0.344428	2.9741	0.00293854	0.0697181
OGDH	137.78	1.27313	0.428599	2.97044	0.00297371	0.0703493
IMPACT	272.976	-1.21158	0.408116	-2.96872	0.0029904	0.0705263
MRGPRD	13.9329	-3.36386	1.13359	-2.96745	0.00300284	NA
HDAC1	418.902	0.996314	0.335788	2.96709	0.00300631	0.0705263
TMEM117	117.936	-1.61283	0.543679	-2.96652	0.00301195	0.0705263
NOP58	496.526	-0.744757	0.251086	-2.96615	0.00301556	0.0705263
SDCCAG8	74.8583	-1.20545	0.406527	-2.96525	0.00302438	0.0705317
PIAS3	114.988	1.13328	0.382779	2.96066	0.00306985	0.0713892
NFE2L2	847.147	-0.970622	0.327963	-2.95955	0.00308092	0.0714442
OR2D3	14.1344	-2.67122	0.902958	-2.9583	0.00309336	NA
PRPF8	485.403	0.824657	0.278798	2.9579	0.00309739	0.0714593
CCP110	113.827	-1.33518	0.451515	-2.95712	0.00310532	0.0714593
SENP7	71.343	-1.15962	0.392177	-2.95688	0.00310768	0.0714593
SLFN5	397.031	-0.783086	0.265217	-2.95262	0.00315087	0.0722501
CHD1	188.015	-1.06376	0.36081	-2.94826	0.00319564	0.072877
SERPINH1	254.99	0.867129	0.294189	2.94753	0.00320325	0.072877
OAF	84.7671	1.31823	0.447255	2.94737	0.00320485	0.072877
SCARNA9	305.09	0.916752	0.311155	2.94628	0.00321616	0.0729323
PTBP2	47.693	-1.32185	0.449103	-2.94331	0.00324727	0.0734349
CORO1B	169.603	0.837185	0.284589	2.94173	0.0032638	0.073606
PFKL	105.523	1.04869	0.357087	2.93679	0.00331628	0.0743283
CRIP1	33.1933	1.71237	0.583346	2.93543	0.00333086	0.0743283
CMBL	181.531	1.3561	0.461989	2.93535	0.00333172	0.0743283
TERC	149.971	1.0887	0.370998	2.93451	0.0033407	0.0743283
EFNA3	67.1836	1.0499	0.357781	2.93448	0.00334111	0.0743283
GLS	349.293	-0.912964	0.311318	-2.93258	0.0033616	0.074582
THADA	30.7256	-1.47436	0.503483	-2.92832	0.00340795	0.0754068
SLC6A20	8.11957	3.00261	1.02574	2.92727	0.00341957	NA
SUMO4	18.9577	-2.16845	0.740949	-2.92658	0.00342706	NA
ST13	508.523	-0.800347	0.273521	-2.92609	0.00343254	0.0757465
OR51M1	239.471	-1.4179	0.484852	-2.92439	0.00345133	0.0758768
FAR1	153.873	-1.01375	0.346714	-2.92388	0.00345693	0.0758768
NAGA	51.1019	1.30696	0.447299	2.92189	0.00347916	0.0761611
CRYGS	34.7237	-1.86924	0.640563	-2.91812	0.00352146	0.0768141
MSH4	89.9509	-1.30105	0.445938	-2.91757	0.0035277	0.0768141
SNORA28	191.578	-1.20063	0.411658	-2.91656	0.00353914	0.0768301
NANOS1	21.2304	-2.22407	0.762686	-2.9161	0.0035444	NA
SLC2A1	2184.6	1.20766	0.414262	2.91522	0.00355438	0.0768301
LINC00552	5.40687	-5.18107	1.77811	-2.91381	0.00357051	NA
FRS2	155.193	-1.12884	0.387421	-2.91373	0.00357141	0.0768301
C1GALT1	209.75	-1.025	0.351815	-2.91347	0.00357442	0.0768301
KIAA1551	222.394	-0.900598	0.309123	-2.91339	0.00357523	0.0768301
DHX29	396.258	-1.19727	0.41119	-2.91172	0.00359447	0.0768928
MBOAT7	165.777	0.962523	0.330593	2.91151	0.00359689	0.0768928
MDH2	399.809	0.898473	0.308899	2.90863	0.00363013	0.077402
RRP7A	107.913	1.11822	0.384718	2.9066	0.00365377	0.0777042
ITPR3	167.749	1.13224	0.389871	2.90414	0.00368268	0.0780763
RBP7	185.128	-1.26689	0.436405	-2.90302	0.00369585	0.0780763
CCDC146	90.4863	-1.39003	0.478916	-2.90245	0.00370258	0.0780763
VPS13C	377.794	-1.36742	0.471243	-2.90173	0.00371103	0.0780763
ZNF91	151.389	-1.18095	0.407098	-2.9009	0.00372088	0.0780763
AGTRAP	96.3239	1.12954	0.389467	2.90023	0.00372885	0.0780763
KIF5B	1360.83	-0.74767	0.257951	-2.8985	0.00374952	0.0780763
RPS6KA4	64.8419	1.12556	0.388343	2.89837	0.00375107	0.0780763
YTHDC1	405.508	-0.871867	0.300876	-2.89776	0.00375832	0.0780763
TWF1	479.068	-0.999424	0.345068	-2.89631	0.00377583	0.0780763
RFC1	282.635	-0.858757	0.296501	-2.8963	0.00377589	0.0780763
CHM	119.082	-1.11515	0.385433	-2.89323	0.00381307	0.0786471
GCFC1	106.54	-1.22147	0.422638	-2.89011	0.00385102	0.0790244
LOC100128881	114.388	1.01852	0.352483	2.88955	0.00385791	0.0790244
AP2A1	192.67	0.902945	0.312507	2.88936	0.00386025	0.0790244
DNMT1	160.689	0.908567	0.314587	2.88812	0.00387549	0.079139
NOC4L	72.4437	1.18307	0.409885	2.88634	0.00389749	0.0793909
NIPAL3	57.9236	1.36115	0.471872	2.88458	0.0039194	0.0796394
OCLM	68.3663	-1.37636	0.477298	-2.88365	0.00393094	0.0796767
AGPAT1	306.986	1.14375	0.396763	2.8827	0.00394285	0.0797213
DBNL	130.313	0.890385	0.309043	2.8811	0.00396285	0.0799289
SLC35A2	55.0664	1.09395	0.380182	2.87745	0.00400905	0.0806624
SMC6	172.327	-1.1404	0.396442	-2.8766	0.00401985	0.0806819
AFF4	189.664	-0.862009	0.299763	-2.87564	0.00403211	0.0807308
ALCAM	458.785	-0.708868	0.246668	-2.87377	0.00405605	0.0810124
PALM	28.978	1.48898	0.518364	2.87246	0.00407287	NA
STXBP3	214.952	-0.929849	0.323866	-2.87109	0.00409053	0.0811989
ATP13A2	30.4382	1.48275	0.516552	2.87047	0.00409865	0.0811989
SPPL3	164.72	1.05546	0.367735	2.87016	0.00410268	0.0811989
SLC5A6	164.316	1.18347	0.412361	2.86998	0.00410495	0.0811989
ZC2HC1A	58.2225	-1.41992	0.495147	-2.86768	0.0041349	0.0814804
FAM50A	114.426	-0.920123	0.320895	-2.86737	0.00413903	0.0814804
RBBP8	81.0876	-1.16118	0.405329	-2.86479	0.00417292	0.0816385
MAP2K3	109.026	1.25417	0.437823	2.86455	0.00417602	0.0816385
AIF1L	99.092	1.16541	0.406915	2.86402	0.00418298	0.0816385
PRPF38B	209.01	-1.11461	0.389308	-2.86306	0.00419574	0.0816385
MPP7	303.77	-0.896364	0.313088	-2.86298	0.00419679	0.0816385
TMED9	162.308	1.08748	0.380306	2.85948	0.00424335	0.0819563
LOC645513	68.8028	-1.30345	0.455927	-2.8589	0.00425107	0.0819563
PIGL	58.8038	-1.34758	0.471513	-2.858	0.00426322	0.0819563
MAP3K11	44.2363	1.17681	0.411784	2.85782	0.00426556	0.0819563
NOL6	50.5357	1.20814	0.422807	2.85743	0.00427085	0.0819563
FAM40B	46.5371	-1.28767	0.450728	-2.85687	0.00427838	0.0819563
IQCB1	169.054	-1.02857	0.360148	-2.85596	0.00429062	0.0819563
TTC21B	68.581	-1.16414	0.407641	-2.85579	0.004293	0.0819563
USP17L6P	39.3631	-4.23386	1.483	-2.85493	0.00430466	0.0819883
FAM106CP	14.6012	-2.95491	1.0358	-2.85277	0.00433405	NA
CHID1	73.1965	1.17293	0.411323	2.8516	0.00434997	0.0826594
FBRS	80.6426	1.0311	0.361878	2.84931	0.00438137	0.0826629
KLF7	53.794	-1.20106	0.421683	-2.84826	0.00439584	0.0826629
NUP188	350.457	1.06706	0.374673	2.84796	0.0044	0.0826629
SMARCA5	458.214	-0.902655	0.316961	-2.84785	0.00440161	0.0826629
C16orf72	247.451	-0.943629	0.331375	-2.84762	0.00440477	0.0826629
MCM5	46.3296	1.47601	0.518408	2.8472	0.00441057	0.0826629
DDHD1	151.984	-0.98449	0.345956	-2.84571	0.00443131	0.0828624
C5orf42	60.3277	-1.3665	0.480733	-2.84254	0.0044755	0.0834986
MYSM1	146.174	-1.00563	0.353879	-2.84174	0.0044868	0.0835195
MRPS31	102.299	-1.12715	0.396749	-2.84097	0.00449771	0.0835333
UBL3	166.529	-1.11992	0.394487	-2.83893	0.00452648	0.0838328
KLHDC10	60.2389	-1.12033	0.394709	-2.83838	0.00453426	0.0838328
DDX59	79.2195	-1.00717	0.35504	-2.83679	0.004557	0.0840639
NPAT	109.231	-1.06141	0.37439	-2.83503	0.00458207	0.0841955
GNAI3	468.296	-0.827176	0.291851	-2.83424	0.00459345	0.0841955
HECTD3	35.6426	1.47095	0.51901	2.83414	0.0045949	0.0841955
PPID	314.603	-0.796299	0.281133	-2.83246	0.00461911	0.0844505
C11orf63	50.8705	-1.47475	0.521683	-2.8269	0.00470009	0.0857402
RDX	347.507	-0.798092	0.282472	-2.82539	0.00472236	0.0859553
SLC25A36	416.932	-0.82534	0.292294	-2.82366	0.00474783	0.0862277
FLOT2	57.8671	1.12843	0.400099	2.82037	0.00479684	0.0869256
ZNF451	77.3013	-1.1053	0.392044	-2.81933	0.00481245	0.0869539
MAT2A	554.664	0.767664	0.272381	2.81834	0.0048272	0.0869539
TRAPPC3	168.133	0.86144	0.305676	2.81815	0.00483018	0.0869539
BRIX1	561.204	-0.875086	0.310802	-2.81557	0.00486901	0.0874037
CEP57L1	101.34	-1.21347	0.43106	-2.81508	0.00487646	0.0874037
DCAF13P3	16.1519	-2.63256	0.935682	-2.81352	0.00490019	NA
IRF2BPL	258.342	0.769149	0.273493	2.81231	0.00491865	0.0879678
TMEM129	24.8869	1.54246	0.548566	2.8118	0.00492657	NA
HOOK3	134.305	-0.929129	0.330888	-2.80799	0.00498524	0.0882694
ATP1A3	43.4226	1.23467	0.43974	2.80773	0.00498914	0.0882694
CSTF3	194.232	-1.05683	0.376432	-2.80749	0.00499294	0.0882694
PLEKHG6	44.1361	1.2153	0.432917	2.80724	0.00499682	0.0882694
STK3	298.597	-0.936627	0.33369	-2.80688	0.00500243	0.0882694
MRPL50	214.076	-0.912523	0.325222	-2.80585	0.00501842	0.0882694
ATP8B2	73.2443	1.10888	0.395211	2.80579	0.00501932	0.0882694
GTF2A1	356.086	-1.2133	0.432448	-2.80565	0.00502154	0.0882694
UROD	45.4863	1.50075	0.535089	2.80467	0.0050368	0.0883484
WDR34	46.8115	1.57843	0.563171	2.80275	0.00506685	0.0885145
FAM192A	140.177	-0.991376	0.353723	-2.80269	0.00506783	0.0885145
DESI1	105.209	-0.968371	0.34582	-2.80022	0.00510679	0.0890057
ENAH	795.592	-0.799043	0.285561	-2.79815	0.00513955	0.0893722
GK5	40.2715	-1.48233	0.52993	-2.79722	0.00515448	0.0893722
TMEM161A	107.015	0.994858	0.355708	2.79684	0.00516049	0.0893722
LOC100335030	99.3357	-1.32926	0.475754	-2.794	0.00520607	0.0899718
SETD2	243.181	-0.958713	0.343317	-2.7925	0.00523023	0.0901994
NOMO1	580.014	0.893399	0.320258	2.78963	0.00527691	0.0908048
ZNF714	68.5685	-1.4145	0.507176	-2.78898	0.00528745	0.0908048
TAS2R13	26.0853	-1.76362	0.632543	-2.78814	0.00530116	NA
ASUN	335.79	-1.07468	0.385536	-2.78751	0.00531154	0.0908673
FURIN	86.294	0.939173	0.336976	2.78706	0.00531884	0.0908673
RNF207	193.866	-1.06541	0.382496	-2.78542	0.00534588	0.0908673
DNAJC24	54.9259	-1.11855	0.401725	-2.78438	0.00536302	0.0908673
JMJD1C	245.379	-0.851111	0.305684	-2.78428	0.00536467	0.0908673
RASA1	241.034	-0.81222	0.291749	-2.78397	0.00536981	0.0908673
B3GNT3	73.0113	1.16995	0.420297	2.78362	0.00537563	0.0908673
ZFYVE16	108.475	-1.10455	0.39686	-2.78321	0.00538233	0.0908673
MED16	84.4189	0.931899	0.334889	2.78271	0.00539071	0.0908673
TPM1	94.8182	-1.37508	0.494411	-2.78125	0.00541493	0.0910885
OFD1	73.2532	-1.40211	0.504277	-2.78045	0.00542843	0.0911288
CLCC1	127.814	-1.00736	0.362622	-2.778	0.00546949	0.0913584
SAPCD2	33.9937	1.47037	0.529323	2.77784	0.00547221	0.0913584
COG4	92.5928	1.05473	0.379745	2.77747	0.0054784	0.0913584
EDC3	71.5189	1.20104	0.432664	2.77592	0.00550465	0.0913584
HLA-E	568.28	0.863787	0.311186	2.77579	0.00550679	0.0913584
POM121	145.315	0.881023	0.317421	2.77556	0.00551064	0.0913584
TSPAN7	13.1834	2.27192	0.818705	2.77502	0.00551987	NA
ATMIN	341.955	-0.949923	0.342313	-2.77501	0.00552001	0.0913584
SWI5	52.4191	-1.59693	0.575929	-2.77278	0.00555792	0.0916184
OSBPL8	633.418	-0.728261	0.262647	-2.77278	0.00555804	0.0916184
HLA-DRB1	39.8718	1.55172	0.559948	2.77118	0.00558537	0.0918844
IKZF5	229.461	-0.772161	0.279004	-2.76756	0.00564777	0.092725
LRP10	109.582	1.12831	0.407878	2.76629	0.00566981	0.0929011
RTN4RL2	46.6764	1.36261	0.492864	2.76467	0.00569806	0.093178
COL6A4P1	29.3075	-1.64119	0.593913	-2.76335	0.00572107	0.0932982
CCZ1B	157.281	-0.874613	0.31655	-2.76295	0.00572814	0.0932982
SMEK2	131.528	-0.928732	0.336255	-2.76199	0.00574506	0.0933885
PLD3	450.579	0.717796	0.260146	2.7592	0.00579429	0.0940026
INTS8	221.892	-0.777526	0.282004	-2.75715	0.0058308	0.0944084
NF1	70.0063	-1.03933	0.3772	-2.75538	0.00586247	0.0946475
SNORD17	164.003	-0.9644	0.35005	-2.75503	0.00586863	0.0946475
PPP1R9B	813.679	0.667907	0.242565	2.75351	0.00589598	0.0948833
SNRNP48	255.356	-0.968124	0.351672	-2.75292	0.00590671	0.0948833
TAF1D	1129.38	-0.808517	0.293817	-2.75177	0.00592748	0.0948833
RCE1	37.9649	1.47925	0.537587	2.75166	0.00592948	0.0948833
FAM69B	21.5631	1.67876	0.610331	2.75057	0.00594915	NA
ASIC1	39.9461	1.36308	0.495874	2.74885	0.00598039	0.0954419
AP1AR	55.0275	-1.15478	0.420155	-2.74846	0.00598764	0.0954419
KIAA1377	28.4577	-1.60971	0.585795	-2.7479	0.00599787	NA
CPSF1	37.927	1.4759	0.537499	2.74587	0.00603501	0.0959907
PLEKHB1	89.7774	0.941398	0.342912	2.74531	0.00604546	0.0959907
PPWD1	196.941	-0.974667	0.355335	-2.74296	0.00608887	0.0964933
LOC100132832	174.789	-1.01047	0.368697	-2.74064	0.00613194	0.0969886
MORN4	63.5415	1.09132	0.398366	2.7395	0.00615327	0.0971388
FAM100A	144.871	0.887135	0.324119	2.73707	0.00619897	0.0976668
PLCB1	87.7863	-1.38705	0.507016	-2.73571	0.00622465	0.0976668
QTRTD1	151.422	-1.08008	0.394866	-2.7353	0.0062324	0.0976668
PLXNB2	275.719	0.748014	0.273477	2.7352	0.0062343	0.0976668
ZCCHC7	270.115	-0.751889	0.274962	-2.73452	0.00624719	0.0976823
FARSA	180.172	0.850456	0.311163	2.73316	0.00627305	0.0979001
FGFR4	58.0862	1.57727	0.577324	2.73204	0.00629442	0.0980473
C3orf74	14.0941	-3.36692	1.23259	-2.73158	0.00630319	NA
CUL2	141.078	-1.02468	0.375149	-2.73141	0.00630647	0.0980489
JUND	158.139	1.34151	0.491474	2.72957	0.00634165	0.0984094
PDS5B	74.9439	-1.13468	0.415897	-2.72828	0.00636651	0.0986089
ROCK2	429.505	-0.819293	0.300776	-2.72393	0.00645098	0.0994516
CCNT1	288.676	-0.727493	0.267103	-2.72365	0.00645653	0.0994516
PDLIM5	509.663	0.933534	0.342756	2.72361	0.00645727	0.0994516
NUCB2	384.244	-1.0712	0.394049	-2.71845	0.0065589	0.100828
MRPS18B	348.22	0.874826	0.321995	2.7169	0.00658974	0.101112
SCAF11	204.23	-0.858331	0.316272	-2.7139	0.0066496	0.101524
LRP5	146.563	0.840686	0.309808	2.71357	0.00665626	0.101524
CLPTM1	405.273	0.802174	0.295658	2.71318	0.00666405	0.101524
C12orf65	155.833	-1.00628	0.370899	-2.71308	0.00666602	0.101524
VCP	915.088	0.915261	0.337443	2.71235	0.00668087	0.101562
USP45	59.1754	-1.44415	0.532789	-2.71055	0.00671717	0.101902
PHF14	134.472	-1.06567	0.393234	-2.71001	0.00672808	0.101902
KRTAP10-11	7.63195	-4.60566	1.70253	-2.70519	0.00682654	NA
ZDHHC24	25.1607	1.40053	0.517758	2.70499	0.00683062	NA
ANO1	143.52	0.87535	0.323631	2.70477	0.0068351	0.103324
LRWD1	60.6553	1.17336	0.433906	2.70419	0.00684718	0.103324
QKI	144.088	-1.00156	0.370617	-2.70242	0.00688366	0.103684
FLJ27352	24.504	-1.74528	0.646078	-2.70134	0.00690604	NA
ASF1B	35.1396	1.60843	0.59585	2.69939	0.00694663	0.104088
FLJ10038	40.9116	-1.39986	0.518628	-2.69915	0.00695165	0.104088
CCDC66	139.27	-1.06848	0.395939	-2.69859	0.00696335	0.104088
TTLL12	208.346	0.850689	0.315269	2.6983	0.00696952	0.104088
CCDC82	39.2711	-1.42284	0.527349	-2.69809	0.00697389	0.104088
CCDC104	238.406	-0.816804	0.302805	-2.69746	0.00698703	0.104095
AKD1	3.49535	-4.53474	1.68118	-2.69736	0.00698909	NA
S100PBP	90.7945	-0.917515	0.340278	-2.69637	0.00700995	0.104248
PSIP1	230.11	-0.860004	0.319051	-2.69551	0.0070282	0.10433
SGTB	112.672	-0.956204	0.355373	-2.69071	0.00713004	0.105571
USP25	236.88	-0.783349	0.291169	-2.69036	0.00713755	0.105571
F2RL1	204.249	0.915187	0.340363	2.68886	0.00716969	0.105677
WRN	137.411	-0.901869	0.335502	-2.68812	0.00718562	0.105677
TUBB3	97.3951	0.985922	0.366788	2.68799	0.00718844	0.105677
SEMA6B	86.7822	0.933073	0.347174	2.68763	0.0071962	0.105677
LINC00622	15.9004	-2.34251	0.871602	-2.68759	0.00719697	NA
EIF5B	397.553	-0.708716	0.263872	-2.68583	0.00723496	0.106029
NAA16	134.479	-1.0319	0.384318	-2.68501	0.00725273	0.106029
ING2	29.4738	-1.57745	0.587722	-2.68401	0.00727456	0.106029
KIF1C	294.097	0.813984	0.30334	2.68341	0.0072876	0.106029
FUCA1	80.7324	1.12434	0.419056	2.68303	0.00729576	0.106029
LOC647859	125.199	-1.02674	0.382691	-2.68295	0.00729763	0.106029
ZNF581	52.2901	1.10652	0.412773	2.6807	0.00734688	0.106556
POLR3H	152.392	0.915968	0.342048	2.67789	0.00740874	0.107132
PKN1	228.876	0.751681	0.280718	2.67771	0.00741268	0.107132
TAB3	230.878	-0.982744	0.367125	-2.67687	0.00743144	0.107214
PPFIA1	277.831	-0.979507	0.366035	-2.67599	0.00745082	0.107305
HIRA	75.3953	1.17475	0.439211	2.67469	0.00747987	0.107535
UBA3	398.741	-0.886169	0.331538	-2.6729	0.00751977	0.107919
LRFN1	27.9453	1.54293	0.577713	2.67076	0.00756796	NA
VAT1	726.944	0.772998	0.289459	2.67049	0.00757397	0.108278
PPP1R2	138.55	-0.95003	0.355805	-2.67009	0.00758315	0.108278
FKBP14	181.606	-1.10686	0.414572	-2.66989	0.00758758	0.108278
AIMP1	208.448	-0.836873	0.313583	-2.66874	0.00761353	0.108278
WHAMMP1	144.742	-0.833914	0.312517	-2.66838	0.00762174	0.108278
SNORA70G	63.8795	-1.27472	0.477728	-2.66829	0.0076239	0.108278
KDM2A	141.988	1.09446	0.41032	2.66732	0.00764578	0.108358
SASS6	36.8882	-1.29818	0.486817	-2.66667	0.0076606	0.108358
GAS2L1	45.6745	1.15937	0.434968	2.66541	0.00768934	0.108358
ZMYM2	296.481	-0.903073	0.338838	-2.66521	0.00769402	0.108358
PIEZO1	84.6386	1.20934	0.453855	2.66459	0.00770824	0.108358
BAZ1A	92.8656	-1.11768	0.419571	-2.66387	0.00772463	0.108358
CCDC134	50.1215	1.38762	0.521079	2.66297	0.00774545	0.108358
FAM175B	133.773	-0.872587	0.327783	-2.66209	0.00776577	0.108358
FLJ42627	121.348	-1.26741	0.476137	-2.66186	0.00777104	0.108358
MSANTD2	48.3143	-1.34141	0.503981	-2.66163	0.00777631	0.108358
KTN1	457.625	-0.846893	0.318197	-2.66154	0.00777847	0.108358
POC5	37.1661	-1.54171	0.579346	-2.66113	0.00778794	0.108358
TST	86.106	0.985559	0.370744	2.65833	0.00785299	0.109078
ANP32E	237.958	-0.780461	0.293746	-2.65692	0.00788577	0.109348
FBXL16	85.8142	1.25495	0.472534	2.65578	0.00791255	0.109465
TMEM173	25.9372	1.4463	0.544652	2.65546	0.0079201	NA
DGKD	100.166	0.856651	0.32267	2.65488	0.00793358	0.109465
PRKRIR	375.134	-1.19129	0.44872	-2.65486	0.00793419	0.109465
PISRT1	10.0816	-2.74221	1.03298	-2.65466	0.00793882	NA
CLSTN1	306.248	0.721732	0.272009	2.65333	0.00797009	0.109776
TTC1	442.821	-0.905422	0.341497	-2.65134	0.00801742	0.110243
AIDA	285.977	-0.740266	0.279373	-2.64974	0.00805537	0.110579
SBDS	464.216	-0.921867	0.34804	-2.64874	0.0080793	0.110723
CCDC147	3.39266	-4.46606	1.68673	-2.64776	0.0081026	NA
TXLNG	221.987	-0.9341	0.353114	-2.64532	0.00816125	0.11166
FASTKD2	44.9045	-1.54887	0.585673	-2.6446	0.00817885	0.111714
ABTB1	45.9571	1.1648	0.440791	2.64253	0.00822893	0.112001
GPAT2	60.3009	1.07005	0.404998	2.6421	0.00823941	0.112001
SLC35F5	110.17	-0.943287	0.357029	-2.64204	0.00824075	0.112001
NEBL	25.6776	-1.77961	0.674407	-2.63877	0.00832064	NA
ZBTB11	207.509	-0.957855	0.36308	-2.63814	0.0083362	0.113111
CYB5B	1731.33	0.892822	0.338827	2.63504	0.0084128	0.113962
KLF4	267.855	-0.906982	0.344835	-2.63019	0.00853363	0.115314
FSD1	32.1124	1.98479	0.7547	2.62991	0.00854077	0.115314
GOLGA6L9	44.4824	-1.4311	0.544665	-2.62749	0.00860168	0.115828
ARID4A	144.604	-1.06502	0.405445	-2.6268	0.00861924	0.115828
MAPK8IP1	23.3321	1.48186	0.564143	2.62675	0.00862049	NA
HIST1H4B	141.808	0.990894	0.377236	2.62672	0.00862114	0.115828
SCARNA18	148.387	1.296	0.493501	2.62612	0.00863636	0.115843
CRY1	34.4478	-1.29397	0.492905	-2.62519	0.00865996	0.11597
SLC30A3	25.5192	1.41751	0.540894	2.62068	0.00877539	NA
C11orf57	109.192	-1.14335	0.43629	-2.62063	0.00877681	0.117343
FOXP4	57.1097	1.14581	0.43733	2.62001	0.00879265	0.117364
N4BP2L1	15.2278	-2.57112	0.981532	-2.6195	0.00880595	NA
DCLRE1C	43.4719	-1.12506	0.429789	-2.6177	0.0088525	0.117971
FAM213B	26.9701	1.33156	0.508717	2.61749	0.00885804	NA
SLC44A2	54.3747	1.35003	0.516371	2.61446	0.0089368	0.118573
PLOD3	150.91	0.833849	0.318962	2.61426	0.00894204	0.118573
GOLGA8B	282.727	-1.10344	0.422135	-2.61394	0.00895037	0.118573
CACNB3	63.0873	1.18904	0.454919	2.61375	0.00895547	0.118573
WDR81	36.9411	1.28044	0.490138	2.61241	0.00899073	0.118849
CLCN3	214.729	-0.989528	0.379001	-2.61089	0.00903081	0.119044
UTP11L	95.1276	-0.894364	0.342596	-2.61055	0.00903955	0.119044
RPS6KA1	78.8734	1.28367	0.491815	2.61008	0.00905215	0.119044
CCDC90B	62.5053	-1.07362	0.411428	-2.60951	0.00906732	0.119044
TUBE1	711.811	-1.22586	0.469838	-2.6091	0.009078	0.119044
TBRG4	86.6383	0.937297	0.360013	2.60351	0.00922742	0.120736
ZBTB9	42.1806	1.09805	0.421812	2.60318	0.00923646	0.120736
BBS7	49.142	-1.14948	0.441996	-2.60065	0.00930486	0.121437
NDUFB2	75.3172	1.09092	0.419586	2.59999	0.00932261	0.121446
ERCC5	63.1227	-1.31475	0.505767	-2.59953	0.00933519	0.121446
APH1A	221.276	0.944705	0.363501	2.59891	0.00935214	0.121474
MICALCL	45.9541	-1.39116	0.53553	-2.59773	0.0093842	0.121609
PAPD5	88.1361	-1.03867	0.399882	-2.59744	0.00939212	0.121609
CCDC41	32.1337	-1.32707	0.511151	-2.59623	0.00942525	0.121751
CASK	244.929	-0.868101	0.334405	-2.59596	0.00943279	0.121751
MMP15	129.43	1.07926	0.416132	2.59356	0.00949876	0.122137
FAM13B	89.439	-0.980234	0.377966	-2.59344	0.00950198	0.122137
CECR5	86.0185	0.872888	0.336709	2.59241	0.00953048	0.122137
SECTM1	45.1862	1.5136	0.583923	2.59212	0.00953853	0.122137
FTX	292.294	-0.887084	0.342242	-2.59198	0.00954265	0.122137
KIAA1407	35.613	-1.33735	0.516024	-2.59164	0.00955198	0.122137
SCAP	153.935	0.766432	0.295883	2.59032	0.00958869	0.122416
MTIF3	246.413	-1.01073	0.390322	-2.58947	0.00961225	0.122526
MOCOS	241.617	-0.974964	0.376681	-2.5883	0.00964508	0.122746
ELOVL1	99.1221	1.07386	0.414974	2.58779	0.00965942	0.122746
SEC62	402.89	-0.730621	0.282415	-2.58704	0.00968034	0.122822
RFX5	96.4546	1.24348	0.48101	2.58514	0.009734	0.123134
EXOC6	75.0497	-1.0082	0.390003	-2.58511	0.00973489	0.123134
ZNF558	75.4212	-0.959139	0.371287	-2.58328	0.00978659	0.123597
SMCR8	67.9526	1.05199	0.407427	2.58204	0.00982193	0.123788
MAP4K3	80.7309	-1.07777	0.41755	-2.58117	0.00984658	0.123788
RPA1	165.428	0.907196	0.351469	2.58116	0.00984695	0.123788
CTNNAL1	115.482	-1.01886	0.395	-2.5794	0.00989717	0.124189
QSOX1	194.885	1.4859	0.576155	2.57899	0.00990909	0.124189
TNPO1	73.5248	-1.00232	0.38911	-2.57593	0.00999715	0.125092
KCTD9	148.343	-0.927454	0.360178	-2.57499	0.0100243	0.125092
PXDC1	65.5588	-1.07035	0.415687	-2.5749	0.0100268	0.125092
LOC728819	7.02956	-3.34863	1.30077	-2.57434	0.0100431	NA
AGPAT3	110.614	0.865808	0.336386	2.57385	0.0100573	0.125145
DYNC1LI1	199.447	-0.826769	0.321237	-2.57371	0.0100616	0.125145
ZC3H4	70.8813	0.935404	0.363685	2.57202	0.0101109	0.125436
EFHC1	29.7133	-1.54791	0.601966	-2.57142	0.0101281	0.125436
PKD1P1	165.6	1.30397	0.507118	2.57133	0.0101309	0.125436
GFPT1	547.001	-0.663022	0.258138	-2.56848	0.0102145	0.126281
TM9SF4	121.906	1.00915	0.393133	2.56694	0.01026	0.126653
TTI1	29.9597	1.43401	0.558809	2.5662	0.0102821	0.126735
CXCL2	71.7671	-1.24725	0.486403	-2.56423	0.0103406	0.127265
UTS2R	7.60183	-3.9394	1.5366	-2.5637	0.0103562	NA
CCDC150	41.3705	-1.67186	0.652173	-2.56351	0.0103619	0.127336
ST14	155.521	0.959472	0.374445	2.56238	0.0103956	0.12756
TUT1	67.4898	1.03287	0.40323	2.56149	0.0104225	0.127699
FAM208B	239.995	-0.715109	0.279297	-2.56039	0.0104556	0.127914
GCC2	154.15	-0.895412	0.3499	-2.55905	0.0104958	0.128215
LZTS2	71.0426	1.23661	0.48333	2.55852	0.0105118	0.128218
SETDB2	40.065	-1.20045	0.469339	-2.55775	0.0105353	0.128315
PINK1	108.998	0.858178	0.335784	2.55574	0.0105962	0.128569
C1orf131	68.2624	-1.22386	0.478869	-2.55573	0.0105967	0.128569
MAN1A1	269.136	1.13865	0.445566	2.55551	0.0106032	0.128569
G6PD	201.169	0.790803	0.30961	2.55419	0.0106434	0.128867
PCSK9	71.1257	1.11932	0.438467	2.55281	0.0106859	0.129191
FZD6	515.035	-0.882352	0.345747	-2.55202	0.0107101	0.129293
MAPT-IT1	9.31052	-3.04238	1.19275	-2.55074	0.0107495	NA
GDAP1	102.032	-1.19871	0.46996	-2.55067	0.0107516	0.129604
METTL15	101.788	-0.990779	0.3889	-2.54764	0.0108454	0.130077
MORF4L1	57.888	-1.24012	0.486914	-2.54689	0.0108687	0.130077
ABCA2	119.398	0.831568	0.326524	2.54673	0.0108737	0.130077
JMY	101.289	-0.872668	0.342677	-2.54662	0.0108772	0.130077
EPC1	181.551	-0.836461	0.328727	-2.54455	0.010942	0.130077
ELMO3	77.7649	0.960966	0.377668	2.54447	0.0109443	0.130077
DNTTIP2	272.421	-0.758138	0.297969	-2.54435	0.0109481	0.130077
NMRAL1	92.9057	0.887775	0.348923	2.54433	0.0109488	0.130077
RAB3GAP2	75.2549	-0.982006	0.385973	-2.54423	0.0109518	0.130077
STK32A	7.44073	-3.52257	1.38457	-2.54417	0.0109537	NA
LIN54	43.3989	-1.24815	0.49066	-2.54383	0.0109646	0.130077
SNRNP200	463.792	0.684751	0.269184	2.54381	0.0109652	0.130077
TSPAN5	168.412	0.960456	0.377869	2.54177	0.0110293	0.130649
CTDNEP1	169.715	0.968242	0.381135	2.54041	0.0110722	0.130967
RSRC1	85.618	-0.886614	0.349377	-2.5377	0.0111583	0.131797
POLR3G	53.3826	-1.00527	0.396394	-2.53605	0.0112112	0.13223
NF2	211.197	0.846333	0.33394	2.53439	0.0112644	0.132667
KREMEN1	29.6833	1.36024	0.536829	2.53384	0.011282	0.132684
HIST3H2BB	110.419	1.00791	0.39792	2.53295	0.0113107	0.132832
THRA	14.8489	1.84619	0.728964	2.53262	0.0113214	NA
APPL2	128.729	-0.951875	0.375889	-2.53233	0.0113308	0.132836
FAM208A	244.119	-1.03529	0.408894	-2.53194	0.0113434	0.132836
ZFAND3	144.906	0.926706	0.366116	2.53118	0.0113679	0.132933
CDT1	72.4416	1.19428	0.471977	2.53038	0.0113938	0.133047
CLDN24	53.8095	-1.46745	0.580062	-2.52981	0.0114123	0.133074
GOLGA6C	4.83855	-4.06886	1.60957	-2.52792	0.011474	NA
PTTG3P	6.56941	-3.59569	1.42307	-2.52671	0.0115135	NA
GTF3A	489.732	-0.694458	0.274917	-2.52606	0.0115348	0.134311
B4GALT3	139.365	0.786055	0.311296	2.52511	0.0115663	0.134487
LIX1L	149.308	1.09071	0.432072	2.52437	0.0115906	0.13449
CLCN7	29.2762	1.49555	0.592509	2.5241	0.0115994	0.13449
GLB1L3	4.09273	-4.77104	1.89071	-2.52341	0.0116223	NA
SDAD1	290.188	-0.694115	0.275087	-2.52326	0.0116273	0.134494
DHX15	673.716	-0.805782	0.319362	-2.5231	0.0116324	0.134494
ZNF37A	161.431	-0.928463	0.36812	-2.52217	0.0116632	0.13466
GPR32	5.73889	-4.181	1.65888	-2.52038	0.0117229	NA
ATP2A2	281.577	0.762497	0.302581	2.51997	0.0117364	0.135315
CCDC18	14.063	-1.94973	0.773975	-2.51911	0.0117652	NA
HIP1R	59.595	0.9669	0.383916	2.51852	0.011785	0.135684
DKFZP434A062	6.80647	-4.58021	1.81914	-2.51778	0.0118096	NA
PLEKHA5	65.1757	-1.16001	0.460775	-2.51752	0.0118184	0.135878
BCKDK	164.251	0.787898	0.313292	2.5149	0.0119067	0.136666
DYX1C1	46.1024	-1.28701	0.511837	-2.5145	0.0119202	0.136666
NFYB	101.647	-0.942667	0.375072	-2.51329	0.011961	0.136943
HOXD8	49.5488	-1.3931	0.55476	-2.51118	0.012033	0.137278
ZNRF2P1	21.0681	-1.66558	0.663293	-2.51108	0.0120361	NA
SRPK2	426.346	-0.956444	0.38098	-2.51048	0.0120567	0.137278
NAA15	146.739	-0.986356	0.392898	-2.51046	0.0120573	0.137278
NPM3	145.584	0.766645	0.305418	2.51015	0.0120679	0.137278
OR51B2	77.7081	-1.17309	0.467373	-2.50998	0.0120739	0.137278
NMT1	179.733	0.990871	0.394937	2.50894	0.0121096	0.137493
CXCL3	97.3049	-1.59166	0.634721	-2.50764	0.0121539	0.137805
CCDC58	270.085	-1.09239	0.43596	-2.50571	0.0122207	0.138372
ATP11B	197.934	-0.844668	0.337218	-2.50482	0.0122515	0.13853
NOTCH2NL	127.584	-0.984299	0.393621	-2.50062	0.0123975	0.139987
LOC339240	5.73403	-4.3249	1.72994	-2.50002	0.0124185	NA
LUC7L2	399.012	-0.693371	0.277493	-2.4987	0.0124649	0.140394
SERINC3	255.021	0.892417	0.357163	2.49862	0.0124677	0.140394
TIPRL	172.211	-0.758414	0.303801	-2.49642	0.0125453	0.140882
FBXO2	64.0814	0.981412	0.393128	2.49642	0.0125454	0.140882
CAPRIN2	48.113	-1.25067	0.501135	-2.49567	0.012572	0.140989
ACTR3BP2	7.03296	-4.46662	1.79016	-2.49509	0.0125924	NA
RAN	497.009	1.13883	0.45654	2.49448	0.0126141	0.141268
RASA2	67.2943	-0.968528	0.388559	-2.49261	0.0126807	0.141678
CABIN1	109.94	1.3739	0.551218	2.49249	0.0126852	0.141678
LGALS3BP	583.108	1.04554	0.420073	2.48896	0.0128118	0.142863
TMEM14E	76.9256	-1.10447	0.44382	-2.48856	0.0128261	0.142863
RPS15AP10	25.73	-1.83955	0.739479	-2.48763	0.0128597	NA
TPP2	411.488	-0.861186	0.346218	-2.48741	0.0128677	0.142892
CIZ1	156.716	0.776183	0.312088	2.48706	0.0128802	0.142892
EZH2	344.475	-1.00885	0.405643	-2.48704	0.012881	0.142892
GUF1	105.517	-0.859638	0.345757	-2.48624	0.0129099	0.143015
ITM2C	537.276	0.701317	0.282132	2.48578	0.0129269	0.143015
NRD1	109.208	-1.1141	0.448528	-2.4839	0.0129952	0.143427
HSPBAP1	78.7764	-1.32837	0.534919	-2.48332	0.0130165	0.143427
USP53	612.952	-1.03235	0.415714	-2.48332	0.0130166	0.143427
OR51B6	63.2815	-1.40257	0.565048	-2.4822	0.0130573	0.143513
TUBA1A	118.164	0.963432	0.388145	2.48215	0.0130594	0.143513
LOC100129794	16.9633	-1.69696	0.68408	-2.48064	0.0131145	NA
LPCAT4	88.1572	1.04882	0.422863	2.48028	0.0131278	0.144072
SKI	98.5952	0.834716	0.336809	2.47831	0.0132006	0.144678
EXOSC8	444.594	-0.852157	0.343927	-2.47773	0.0132222	0.144721
TRAF7	143.545	1.31646	0.531871	2.47515	0.0133179	0.145575
EIF2AK1	586.833	0.907582	0.366769	2.47453	0.013341	0.145633
PCBD2	32.1104	-1.60884	0.650382	-2.47369	0.0133727	0.145786
AGL	124.995	-0.841717	0.340437	-2.47246	0.0134187	0.146093
LRRCC1	34.7708	-1.2078	0.488744	-2.47123	0.0134649	0.146402
MARVELD1	91.7625	0.839141	0.339916	2.46867	0.0135617	0.147235
TMEM101	90.9339	0.996488	0.403722	2.46825	0.0135774	0.147235
PSKH1	11.8313	1.83814	0.745184	2.4667	0.0136366	NA
RAB22A	454.951	-0.91266	0.370066	-2.46621	0.0136552	0.147752
ZMYND8	97.2573	-1.10304	0.447289	-2.46605	0.013661	0.147752
HADH	60.8162	-0.977226	0.39649	-2.46469	0.013713	0.148079
FCHO2	94.8995	-1.12598	0.456912	-2.46432	0.0137274	0.148079
ACTR1B	74.374	0.870528	0.353777	2.46067	0.0138677	0.14909
CLOCK	147.049	-0.844031	0.343018	-2.4606	0.0138705	0.14909
ARL5B	197.127	-0.906004	0.368224	-2.46047	0.0138756	0.14909
SOLH	20.885	1.48851	0.605079	2.46002	0.013893	NA
PAK4	177.221	0.853106	0.346917	2.45911	0.0139283	0.14946
MLLT1	198.248	0.690318	0.280778	2.45859	0.0139486	0.149483
ATP6AP1	268.644	0.664223	0.270252	2.45779	0.0139795	0.149618
PAM	130.182	0.891686	0.362989	2.45651	0.0140293	0.149853
FAM217B	79.5192	-1.1562	0.470711	-2.45629	0.0140379	0.149853
TMEM68	107.87	-0.822212	0.334812	-2.45574	0.0140593	0.149887
RPTOR	61.5039	1.37844	0.561822	2.45352	0.0141465	0.150524
MEF2A	75.4964	-0.910834	0.371271	-2.45329	0.0141558	0.150524
ROBO3	6.83993	-3.91898	1.59791	-2.45256	0.0141842	NA
DYNC2LI1	93.932	-0.931315	0.379887	-2.45156	0.014224	0.150998
LRFN3	25.4456	1.29588	0.5286	2.45153	0.0142249	NA
CES2	56.546	1.05546	0.430583	2.45122	0.0142371	0.150998
ABCD1	31.7136	1.2461	0.508629	2.44992	0.0142886	0.151349
LRRFIP2	303.974	-0.960882	0.392357	-2.449	0.0143254	0.151506
CCDC43	145.591	-0.932463	0.380857	-2.44833	0.014352	0.151506
SOCS4	29.4177	-1.46745	0.599409	-2.44816	0.0143588	0.151506
SLC29A3	19.4228	1.6851	0.688352	2.44802	0.0143645	NA
CDC14A	39.4664	-1.42293	0.581348	-2.44764	0.0143795	0.151529
IDI1	359.321	-0.63415	0.259195	-2.44662	0.0144204	0.151676
SUMF2	304.608	0.691018	0.282467	2.44637	0.0144304	0.151676
ARPC1B	175.45	0.762376	0.31179	2.44516	0.0144789	0.151992
CRELD1	108.802	0.859011	0.351389	2.44462	0.0145006	0.152025
TMEM160	23.5306	1.38562	0.567353	2.44226	0.0145958	NA
ECT2	44.814	-1.08716	0.445218	-2.44185	0.0146122	0.152999
DPF2	410.935	0.789206	0.323374	2.44054	0.0146655	0.153068
VPS4A	642.817	1.08045	0.442748	2.44033	0.014674	0.153068
GPN1	49.9234	1.32772	0.54423	2.43964	0.014702	0.153068
VCAN	45.4156	1.47975	0.606654	2.43921	0.0147195	0.153068
XRN1	67.9505	-0.901377	0.369587	-2.43887	0.0147332	0.153068
LRRC37A3	19.3744	-1.68407	0.690551	-2.43873	0.014739	NA
WDPCP	25.8745	-1.54112	0.632016	-2.43842	0.0147518	NA
MRPL10	153.838	0.9034	0.370635	2.43744	0.0147916	0.153068
ZNF217	57.5308	-0.978576	0.401504	-2.43727	0.0147985	0.153068
ZNF431	88.6804	-0.883443	0.362487	-2.43717	0.0148028	0.153068
ZNF800	181.61	-0.84312	0.345947	-2.43714	0.014804	0.153068
CRABP2	491.541	0.659099	0.270459	2.43696	0.0148112	0.153068
PARP9	174.032	-1.13611	0.466343	-2.43621	0.0148421	0.153068
TUG1	390.857	-0.849924	0.348873	-2.4362	0.0148425	0.153068
WAC	1035.42	-0.582841	0.239441	-2.43418	0.0149258	0.153733
LOC401397	177.53	-0.690633	0.283782	-2.43367	0.0149466	0.153756
SLC25A46	74.092	-0.967844	0.397862	-2.43261	0.0149902	0.153843
RAD17	200.721	-0.718819	0.295499	-2.43256	0.0149926	0.153843
C15orf41	28.315	-1.41505	0.582244	-2.43033	0.0150849	NA
SPIC	4.90447	-4.07919	1.68171	-2.42563	0.015282	NA
POMT1	29.2384	1.19388	0.492237	2.42542	0.0152905	NA
DENND4B	50.3208	1.04981	0.432963	2.42472	0.0153201	0.156858
HSPG2	55.8482	1.18514	0.488794	2.42461	0.0153247	0.156858
MVK	34.303	1.17695	0.485672	2.42334	0.0153787	0.157215
PA2G4P4	15.1222	-1.77088	0.730821	-2.42314	0.0153871	NA
SDC3	118.92	0.814545	0.336306	2.42204	0.0154339	0.157583
EML2	230.779	0.768	0.317172	2.4214	0.0154608	0.157662
NSUN6	72.1122	-1.04626	0.432305	-2.42019	0.0155124	0.157991
DPM2	182.183	0.822822	0.340093	2.4194	0.0155462	0.158139
TXN2	216.901	0.686741	0.283932	2.41869	0.0155767	0.158254
CACTIN	43.3412	1.04567	0.432489	2.4178	0.0156148	0.158314
FLOT1	168.561	0.835635	0.34564	2.41765	0.0156212	0.158314
LOC285548	7.51102	-3.54932	1.4688	-2.41647	0.0156718	NA
MCM3	258.78	0.765562	0.316987	2.41512	0.01573	0.159028
JAGN1	163.241	0.895974	0.370999	2.41503	0.0157338	0.159028
XPO6	180.969	0.823459	0.341073	2.41432	0.0157646	0.159028
FAM20C	68.9321	0.946568	0.392152	2.41378	0.0157881	0.159028
PHAX	204.136	-0.866026	0.358819	-2.41355	0.0157981	0.159028
EXOSC9	113.196	-0.79521	0.329509	-2.41332	0.0158079	0.159028
ELF1	220.51	-0.780587	0.323748	-2.4111	0.0159047	0.159792
LRRC6	34.6777	-1.49474	0.620047	-2.41068	0.0159227	0.159792
STEAP3	106.357	0.984944	0.408676	2.41009	0.0159487	0.159857
IGSF9	14.2928	1.63667	0.679248	2.40953	0.0159731	NA
BORA	43.5092	-1.15247	0.478362	-2.40919	0.015988	0.160055
ATG2B	71.9842	-1.12892	0.468763	-2.4083	0.0160272	0.160252
HIST1H2BF	29.0931	1.18939	0.493955	2.4079	0.0160446	NA
FLJ43663	103.412	-1.05295	0.437331	-2.40768	0.0160543	0.160328
APLP1	58.6859	1.33376	0.554671	2.40459	0.0161904	0.161391
METTL5	463.357	-0.607348	0.252601	-2.40438	0.0162	0.161391
UBR2	158.525	-0.827459	0.344288	-2.40339	0.0162437	0.16163
C1orf233	24.1032	1.26333	0.525767	2.40284	0.0162683	NA
AKAP9	77.8486	-0.912701	0.379881	-2.4026	0.0162791	0.161782
RABAC1	171.811	0.885888	0.368893	2.40148	0.0163291	0.161782
RPAP1	36.4319	1.11559	0.464574	2.40132	0.0163362	0.161782
CDC5L	268.418	-0.704688	0.293463	-2.40128	0.0163378	0.161782
CRB3	29.0261	1.24192	0.517194	2.40127	0.0163385	NA
DLG1	227.37	-0.83814	0.349146	-2.40054	0.016371	0.161842
PDIA5	200.414	0.756445	0.315151	2.40026	0.0163833	0.161842
FOXD4	70.0576	-1.35833	0.566186	-2.39909	0.0164359	0.162166
KIAA0825	27.9177	-1.57576	0.656904	-2.39877	0.0164503	NA
GOLGB1	227.104	-0.934168	0.389845	-2.39625	0.0165637	0.163231
LOC728730	23.2588	-1.57829	0.658731	-2.39595	0.0165773	NA
RFK	222.395	-0.765085	0.319443	-2.39506	0.0166176	0.163566
HIST1H2BM	28.4185	1.86829	0.780183	2.39469	0.0166346	NA
LTV1	250.786	-0.81362	0.339781	-2.39454	0.0166412	0.163602
FGFR1OP2	59.1855	-1.04465	0.4364	-2.39379	0.0166751	0.16374
ZNF649	21.2465	-1.53542	0.641975	-2.39172	0.0167698	NA
ANP32D	3.20003	-4.42083	1.84855	-2.39151	0.0167793	NA
IFNA1	9.66128	-2.27584	0.951784	-2.39113	0.0167964	NA
UBXN6	128.928	0.766888	0.320942	2.38949	0.0168719	0.165474
OR4D1	7.40293	-3.76326	1.57501	-2.38936	0.0168776	NA
PRPF6	95.2151	0.792302	0.331815	2.38779	0.0169503	0.166044
CCDC110	15.4675	-1.80276	0.755105	-2.38742	0.0169669	NA
MIR548I1	40.4787	-1.30512	0.546929	-2.38627	0.0170201	0.166529
KRTAP5-9	4.54104	-3.96001	1.65953	-2.38623	0.0170221	NA
OR6S1	3.59642	-4.58198	1.92018	-2.38623	0.0170222	NA
SNORA67	133.859	0.822828	0.345013	2.38492	0.0170828	0.166819
FAM8A1	32.9733	-1.18107	0.495434	-2.3839	0.0171302	0.166819
SOS1	59.356	-1.25498	0.526459	-2.38382	0.0171341	0.166819
FAM204A	303.696	-0.885082	0.371342	-2.38347	0.0171503	0.166819
MTX3	120.439	-1.04999	0.440568	-2.38325	0.0171603	0.166819
ANKRD18DP	4.99186	-3.30271	1.38621	-2.38255	0.0171931	NA
TAOK3	66.9417	-1.13836	0.477797	-2.38252	0.0171944	0.166819
RAI1	73.7981	0.958445	0.4023	2.38241	0.0171996	0.166819
MCAM	124.522	1.02603	0.430719	2.38214	0.0172123	0.166819
MCM7	96.9064	0.926353	0.389011	2.3813	0.0172516	0.166916
ACADVL	104.237	0.972231	0.408319	2.38106	0.0172629	0.166916
CASKIN2	37.9696	1.07194	0.450401	2.37996	0.0173145	0.167217
NAMPT	566.37	-0.609547	0.256187	-2.37931	0.0173451	0.167316
OR52B6	9.31086	-2.57586	1.08283	-2.37883	0.0173675	NA
PPP1R37	15.3734	1.56688	0.658759	2.37853	0.0173817	NA
PCDHB19P	5.30344	-3.37459	1.41889	-2.37833	0.017391	NA
LOC145474	12.3623	-1.85487	0.779907	-2.37832	0.0173916	NA
LOC286367	3.16824	-4.38666	1.84471	-2.37797	0.017408	NA
VN1R1	6.01384	-3.01672	1.26879	-2.37763	0.0174243	NA
UBE2C	279.771	1.00147	0.421272	2.37724	0.0174426	0.168059
ZNF813	15.735	-1.63896	0.689899	-2.37566	0.0175178	NA
SUPT3H	37.0102	-1.23773	0.521005	-2.37565	0.0175181	0.168589
VNN1	2.94998	-4.25321	1.79081	-2.37502	0.017548	NA
SLC12A7	44.9478	1.09706	0.462161	2.37375	0.0176084	0.169259
PHACTR2	6.1168	-3.12878	1.31835	-2.37326	0.017632	NA
SUPT16H	298.803	-0.827217	0.348613	-2.37288	0.01765	0.16946
LOC646329	60.7367	-1.10926	0.467654	-2.37196	0.0176939	0.169602
TMA16	234.73	-0.730384	0.307957	-2.37171	0.017706	0.169602
NUPL2	132.899	-0.749484	0.316275	-2.36972	0.0178014	0.170316
CCNL2	235.802	-0.875241	0.369463	-2.36896	0.0178383	0.170367
CYR61	178.465	-0.916359	0.386853	-2.36875	0.0178482	0.170367
MGRN1	150.758	0.857412	0.36207	2.36808	0.0178805	0.170478
SLC7A5	883.662	1.0781	0.455419	2.36727	0.0179197	0.170653
C6orf106	209.825	0.85793	0.362553	2.36636	0.0179639	0.170722
XRCC3	46.7639	1.17675	0.497301	2.36627	0.0179686	0.170722
EGFL7	100.795	0.900788	0.380756	2.36579	0.0179916	0.170744
ICAM5	28.5099	1.22011	0.515949	2.36478	0.0180408	NA
CRYZ	86.5064	-0.912726	0.38597	-2.36476	0.0180418	0.171022
PEX6	18.6837	1.35192	0.571914	2.36386	0.0180858	NA
APOBEC3C	140.424	0.999862	0.42299	2.3638	0.0180887	0.171221
AGPS	360.945	-0.689928	0.291913	-2.36347	0.0181045	0.171221
ANAPC4	66.1096	-0.951755	0.402859	-2.3625	0.018152	0.171363
ZC3H8	114.893	-0.906973	0.383944	-2.36225	0.0181642	0.171363
BNIP2	316.135	-0.857768	0.363171	-2.36189	0.0181821	0.171363
PNPT1	416.64	-0.884478	0.374585	-2.36122	0.0182149	0.171453
DPEP2	3.90566	-4.71662	1.99772	-2.361	0.0182259	NA
PIGT	315.751	0.751969	0.318533	2.36073	0.0182392	0.171453
LINC00515	37.6143	-1.48168	0.627859	-2.35989	0.0182803	0.171453
VIPAS39	58.7151	-0.93445	0.396019	-2.35961	0.0182943	0.171453
TGFB1	229.622	0.781877	0.331417	2.3592	0.0183146	0.171453
FAM71E1	81.6241	0.873659	0.370344	2.35905	0.0183219	0.171453
CCDC25	145.576	-0.890819	0.37767	-2.35872	0.0183379	0.171453
PTPN9	49.2829	1.00385	0.425756	2.35781	0.0183831	0.171514
PAN3	94.7612	-0.884724	0.375248	-2.35771	0.0183883	0.171514
LATS1	172.836	-0.762965	0.323657	-2.35733	0.0184071	0.171514
KHNYN	82.2648	1.04962	0.44562	2.35542	0.018502	0.171967
PALD1	68.0813	1.06831	0.453667	2.35485	0.0185304	0.171967
KCMF1	755.411	-0.570753	0.242467	-2.35394	0.0185756	0.171967
TBC1D13	85.9378	0.973764	0.413718	2.35369	0.018588	0.171967
TEX2	74.6668	0.857889	0.364539	2.35335	0.0186051	0.171967
DDX60	146.947	-0.990403	0.420849	-2.35334	0.0186054	0.171967
DNAAF3	120.814	0.865502	0.367937	2.35231	0.0186574	0.171967
OR13H1	41.8738	-1.25438	0.533265	-2.35226	0.0186596	0.171967
ZNF131	242.167	-0.805107	0.342297	-2.35207	0.0186694	0.171967
ZER1	73.8647	0.882753	0.375339	2.35188	0.0186787	0.171967
EPS8	208.938	-0.701563	0.298318	-2.35173	0.0186861	0.171967
CA12	7.84153	2.04454	0.869537	2.35129	0.0187083	NA
C7orf63	27.4007	-1.6167	0.687658	-2.35102	0.0187219	NA
STOM	123.422	0.876342	0.372789	2.35077	0.0187345	0.172219
SH3D19	297.034	-0.867634	0.369248	-2.34973	0.0187868	0.172506
UBE3B	88.7083	0.940778	0.400456	2.34927	0.0188105	0.172531
TIMELESS	114.131	0.990092	0.421527	2.34882	0.018833	0.172545
CES3	8.73293	1.94589	0.828534	2.3486	0.0188443	NA
HYOU1	591.9	0.616661	0.262607	2.34823	0.0188629	0.172626
ZNF204P	61.6335	-1.11182	0.473598	-2.3476	0.018895	0.172727
DTD1	95.2903	-0.845391	0.360216	-2.3469	0.0189302	0.172857
MAPK8IP2	31.5947	1.56999	0.66956	2.3448	0.0190372	0.173425
SPDYE7P	87.1924	-1.06429	0.453905	-2.34475	0.01904	0.173425
IVNS1ABP	202.829	1.122	0.478579	2.34444	0.0190559	0.173425
TBCD	220.861	0.688995	0.293954	2.34389	0.0190839	0.173488
ANXA6	191.762	0.823126	0.3513	2.34309	0.0191249	0.173668
MSANTD4	64.2467	-1.09422	0.467261	-2.34177	0.0191926	0.173866
RAB3IP	203.274	-0.975848	0.416751	-2.34156	0.0192034	0.173866
OLFML2A	7.74138	2.27563	0.971945	2.34131	0.0192161	NA
MIER3	75.1706	-0.83925	0.358472	-2.34119	0.0192225	0.173866
RAB25	251.142	0.789952	0.33744	2.34101	0.0192314	0.173866
GABPB1	40.5559	-1.08161	0.462188	-2.34019	0.019274	0.17406
CYBRD1	125.415	0.85477	0.365587	2.33807	0.0193835	0.174856
RCC1	169.393	0.792874	0.339305	2.33676	0.0194517	0.175279
MAZ	535.617	0.731684	0.313198	2.33617	0.0194823	0.175362
NEK5	6.23328	-3.06604	1.3126	-2.33585	0.0194992	NA
UBXN4	353.352	-0.870428	0.372833	-2.33463	0.0195626	0.175773
PARM1	47.2254	1.07814	0.461832	2.33448	0.0195708	0.175773
KBTBD13	3.17718	-4.39108	1.88104	-2.33439	0.0195753	NA
ALPK1	55.1111	-1.17804	0.504885	-2.33327	0.0196338	0.176062
NDUFA2	89.3012	0.798604	0.34241	2.33231	0.0196846	0.176062
SSBP1	630.139	-0.565697	0.242562	-2.33217	0.0196915	0.176062
PHIP	59.9292	-1.0941	0.469163	-2.33202	0.0196996	0.176062
LOC650623	46.8189	-1.08758	0.466412	-2.3318	0.019711	0.176062
ZNF791	176.819	-0.863455	0.370357	-2.33141	0.0197317	0.176062
AP2A2	163.885	0.668457	0.28696	2.32944	0.0198357	0.176728
USP39	175.57	0.776502	0.333432	2.32881	0.0198689	0.176728
PLOD2	525.203	-0.840066	0.360741	-2.32872	0.0198738	0.176728
PPP4C	281.528	0.768606	0.3302	2.3277	0.0199283	0.176728
NCSTN	212.452	0.823875	0.353954	2.32763	0.0199315	0.176728
SPEN	238.645	-0.762875	0.327757	-2.32756	0.0199355	0.176728
FAM83F	26.9081	1.15387	0.495797	2.3273	0.0199494	NA
ENPEP	28.9333	-1.42369	0.611978	-2.32637	0.0199989	NA
TNFRSF21	326.286	0.910007	0.391274	2.32575	0.0200316	0.177329
GCN1L1	127.14	0.734373	0.315795	2.32548	0.0200465	0.177329
RAB28	85.9171	-0.849835	0.365515	-2.32504	0.0200699	0.177346
MLLT4	153.792	-0.830866	0.357444	-2.32446	0.0201006	0.177426
KLHL9	189.767	-0.702548	0.302369	-2.32348	0.0201534	0.177701
SNORA70B	33.0771	-1.5608	0.671941	-2.32282	0.0201888	0.177822
FBXO41	15.4263	1.50816	0.649402	2.32237	0.0202128	NA
THEMIS2	23.9931	1.45703	0.627581	2.32166	0.0202512	NA
FTSJD1	36.0039	-1.08694	0.468342	-2.32083	0.0202962	0.178396
DYNC1I2	179.113	-0.802105	0.345615	-2.3208	0.0202974	0.178396
KRTAP5-8	8.45764	-2.98672	1.28757	-2.31965	0.0203598	NA
TMEM41A	58.3751	-1.04917	0.452411	-2.31907	0.0203912	0.178872
RB1	237.998	-0.76179	0.328546	-2.31867	0.0204127	0.178872
SYVN1	68.3817	0.838516	0.361648	2.31859	0.020417	0.178872
TECPR2	25.2105	1.18737	0.51236	2.31746	0.0204788	NA
LRBA	456.852	-0.615084	0.265504	-2.31667	0.0205219	0.1796
HSBP1L1	139.91	-0.804633	0.347724	-2.314	0.020668	0.180685
CCSAP	140.538	-1.01548	0.439044	-2.31293	0.0207265	0.180777
PHLDA2	210.839	0.80443	0.34781	2.31284	0.0207313	0.180777
LY6E	249.799	1.04262	0.450842	2.3126	0.0207445	0.180777
NUP50	209.568	-0.690531	0.298877	-2.31042	0.0208649	0.181548
HAUS6	331.907	-0.791902	0.342785	-2.3102	0.0208772	0.181548
C12orf4	27.7414	-1.26242	0.546632	-2.30945	0.0209188	NA
BMP4	96.0502	1.18026	0.511173	2.30892	0.0209483	0.181973
LOC349196	46.4322	-5.00323	2.16772	-2.30806	0.020996	0.182194
TBPL1	57.8989	-0.999035	0.433072	-2.30686	0.0210629	0.182433
GDA	231.329	-0.951087	0.412303	-2.30676	0.021068	0.182433
VPS54	144.948	-0.825681	0.358092	-2.30578	0.021123	0.182584
SUSD2	8.85069	2.55429	1.10792	2.30549	0.0211389	NA
FAM129B	223.118	0.765848	0.332197	2.3054	0.0211439	0.182584
REXO1L1	51.4262	-5.87945	2.55045	-2.30526	0.021152	0.182584
MAOB	63.7663	1.28247	0.556568	2.30424	0.0212094	0.182886
PAPD4	180.542	-0.673258	0.292307	-2.30326	0.0212643	0.183055
DHX8	45.8805	1.04431	0.45356	2.30246	0.021309	0.183055
SCAI	47.6315	-0.960497	0.417313	-2.30162	0.0213566	0.183055
PIGA	41.3167	-1.11016	0.482344	-2.30158	0.0213586	0.183055
MGAT4B	286.191	0.610819	0.265392	2.30157	0.0213592	0.183055
C10orf88	78.116	-0.934574	0.40607	-2.30151	0.0213627	0.183055
PLXNA1	33.6744	1.03834	0.451348	2.30053	0.021418	0.18317
WDR43	313.446	-0.688464	0.299271	-2.30047	0.0214214	0.18317
NCAPD3	66.7989	0.864906	0.376031	2.30009	0.0214431	0.18317
MAGOH	242.123	-0.949956	0.413087	-2.29965	0.021468	0.183192
ABCE1	977.939	-0.60913	0.264962	-2.29893	0.0215089	0.183351
CCDC74B	2.74035	3.74539	1.62923	2.29888	0.0215119	NA
PCMTD2	199.355	-0.884774	0.385002	-2.2981	0.0215561	0.183562
MAP3K9	93.1107	0.849945	0.370024	2.297	0.0216187	0.183586
ATAD3A	62.3536	0.886763	0.386067	2.29692	0.0216235	0.183586
TRIM11	47.6748	1.19526	0.52046	2.29655	0.0216446	0.183586
SLAIN2	408.461	-0.711683	0.309933	-2.29625	0.0216616	0.183586
CLU	199.679	0.692261	0.301495	2.29609	0.0216707	0.183586
LOC728407	65.3997	-0.906102	0.394746	-2.2954	0.02171	0.183729
TMOD3	696.216	-0.590839	0.257511	-2.29443	0.0217661	0.184014
GOLGA6L10	19.5529	-1.59704	0.696304	-2.29359	0.0218141	NA
HUS1B	11.3863	-1.96884	0.859036	-2.29192	0.0219103	NA
GTPBP10	211.964	-0.977102	0.426403	-2.2915	0.0219344	0.185247
ATP5G2	669.216	0.602734	0.26315	2.29046	0.0219945	0.185407
GAS5-AS1	225.161	-0.833033	0.363712	-2.29037	0.0220001	0.185407
NAPG	219.437	-0.709832	0.30997	-2.29	0.0220212	0.185407
FAM114A1	78.6789	-0.831669	0.364127	-2.28401	0.0223709	0.188158
WDR19	49.2578	-1.13877	0.498689	-2.28353	0.0223993	0.188205
ABCF3	69.886	1.03761	0.454499	2.28299	0.0224312	0.18828
FNBP4	109.494	-0.804351	0.352475	-2.28201	0.0224887	0.18857
TAS2R9	3.72422	-3.68022	1.61393	-2.28028	0.0225912	NA
RBPJ	304.602	-0.682229	0.299247	-2.27982	0.0226184	0.189464
FXYD6	8.74351	2.26948	0.995558	2.27961	0.0226309	NA
TUBB4A	34.1968	1.05415	0.462586	2.27882	0.0226777	0.189766
ENY2	97.0368	-0.752708	0.330379	-2.27832	0.0227076	0.189823
XRCC6	1030.05	0.61481	0.270005	2.27703	0.0227843	0.190271
ARHGAP12	118.937	-0.819822	0.360108	-2.2766	0.0228102	0.190294
CAMKK2	22.9556	1.19667	0.525765	2.27605	0.0228432	NA
GRB7	64.0945	0.912045	0.400775	2.2757	0.0228637	0.190358
KLHL28	127.436	-0.914394	0.40187	-2.27535	0.022885	0.190358
GPRC5B	38.419	1.1741	0.516019	2.27531	0.0228875	0.190358
IFIT5	121.965	-1.11671	0.491063	-2.27407	0.0229619	0.190531
VGF	309.789	0.977336	0.429801	2.27393	0.0229705	0.190531
LMBR1	255.462	-0.72678	0.319632	-2.2738	0.022978	0.190531
CCDC84	95.6938	-0.889522	0.391297	-2.27327	0.0230101	0.190605
ZNF700	23.4019	-1.26206	0.555313	-2.27271	0.0230438	NA
CRTC3	118.221	0.70744	0.311298	2.27255	0.0230534	0.190771
CHST7	31.9822	1.17451	0.516926	2.2721	0.0230804	0.190803
C21orf59	129.768	-0.81002	0.356602	-2.2715	0.023117	0.190913
TAS2R5	30.5365	-1.50085	0.660921	-2.27084	0.0231565	0.190982
RND3	91.997	-0.847603	0.373356	-2.27023	0.0231936	0.190982
ARHGAP5	187.355	-0.703221	0.309785	-2.27003	0.0232059	0.190982
CARHSP1	68.5831	0.91293	0.402203	2.26982	0.0232184	0.190982
NCAPG	199.471	-0.890358	0.392404	-2.26898	0.0232693	0.191209
PPP2R5D	34.1234	1.04084	0.458808	2.26858	0.0232941	0.191213
SENP5	259.018	-0.895052	0.394607	-2.26821	0.0233164	0.191213
GRB14	42.3434	-1.1109	0.490297	-2.26577	0.0234656	0.192245
ENGASE	12.2407	1.60681	0.709428	2.26494	0.0235166	NA
FAM175A	128.571	-1.12752	0.497883	-2.26464	0.0235349	0.192298
USP24	249.589	-0.738249	0.326107	-2.26382	0.023585	0.192298
CCDC132	29.5565	-1.17335	0.518456	-2.26316	0.0236259	0.192298
EOGT	47.0453	-1.12037	0.495085	-2.26299	0.0236361	0.192298
GOLGA1	134.008	-0.957233	0.423014	-2.26289	0.0236427	0.192298
TMEM179B	137.506	0.805397	0.35594	2.26273	0.0236521	0.192298
GOLGA6L5	67.8638	-1.11739	0.493969	-2.26206	0.023694	0.192298
SRFBP1	57.057	-1.14407	0.505766	-2.26205	0.0236945	0.192298
SPCS3	733.23	-0.832125	0.367887	-2.2619	0.0237035	0.192298
FAM195B	29.4927	1.13861	0.503398	2.26185	0.0237064	0.192298
MMP14	43.5901	0.956605	0.423454	2.25905	0.0238802	0.193517
ASCC2	113.595	0.745183	0.329958	2.25842	0.0239196	0.193645
NUCKS1	995.03	-0.675881	0.299341	-2.2579	0.0239521	0.193717
HELZ	316.693	-0.912412	0.404361	-2.25643	0.0240438	0.193949
EFNB1	68.7597	0.918857	0.40723	2.25636	0.0240483	0.193949
TRMT11	147.723	-0.978435	0.433645	-2.2563	0.0240516	0.193949
SCAMP3	59.5624	1.02579	0.454988	2.25453	0.0241626	0.194576
ABCA5	87.3335	-1.04259	0.46249	-2.25431	0.0241768	0.194576
HRK	10.4966	-2.00284	0.88859	-2.25396	0.0241989	NA
DCDC1	9.46509	-2.40148	1.0656	-2.25364	0.0242187	NA
RRP9	73.973	0.900734	0.399696	2.25355	0.0242248	0.194771
DCAF11	101.093	0.767758	0.340778	2.25296	0.0242618	0.194878
ZIC5	76.7119	-0.840803	0.373267	-2.25255	0.0242877	0.194895
ZNF252P	142.672	-0.916444	0.407115	-2.25107	0.024381	0.195323
ASB3	127.957	-0.880692	0.391339	-2.25046	0.0244198	0.195323
MRPL39	101.462	-0.966753	0.429587	-2.25042	0.024422	0.195323
CXorf26	93.3094	-0.905023	0.402299	-2.24963	0.0244726	0.195323
YPEL5	544.729	-0.693806	0.308424	-2.24952	0.0244795	0.195323
CCDC85B	121.329	0.847774	0.37688	2.24945	0.0244838	0.195323
FARSB	281.35	-0.613686	0.273151	-2.24669	0.0246596	0.196453
USP34	143.105	-0.720038	0.320534	-2.24637	0.0246804	0.196453
C10orf2	144.315	0.739191	0.32914	2.24582	0.0247154	0.196453
IWS1	223.467	-0.777432	0.346182	-2.24573	0.0247212	0.196453
PNISR	613.359	-0.722188	0.321636	-2.24536	0.0247453	0.196455
DNAJC9	103.496	-0.737984	0.328797	-2.2445	0.0248003	0.196701
MPC1	291.194	-0.987977	0.44032	-2.24377	0.0248473	0.196766
DDX46	105.247	-0.752285	0.335299	-2.24363	0.0248564	0.196766
IGSF3	72.3766	0.835841	0.372667	2.24287	0.0249055	0.196965
MMGT1	218.748	-0.900783	0.401898	-2.24132	0.0250052	0.19749
SCARNA16	199.49	1.05359	0.470125	2.24109	0.02502	0.19749
BIRC2	354.837	-0.683806	0.30525	-2.24015	0.0250812	0.197783
STX16	205.195	-0.840958	0.375639	-2.23874	0.025173	0.198146
CLPTM1L	123.824	1.04778	0.468032	2.2387	0.0251756	0.198146
NELF	126.74	0.800069	0.357676	2.23685	0.0252959	0.198902
ENSA	145.334	0.666195	0.297915	2.23619	0.0253392	0.199052
SLC12A9	22.5545	1.2914	0.577511	2.23615	0.0253418	NA
FBXO31	124.541	0.677905	0.303219	2.2357	0.0253717	0.199117
LRRC24	9.54793	1.88004	0.841142	2.2351	0.0254105	NA
OR13J1	5.95493	-3.08523	1.38067	-2.23458	0.0254447	NA
TARSL2	93.4819	-0.807939	0.36157	-2.23453	0.0254483	0.199528
DEDD	196.247	0.67856	0.303731	2.23408	0.0254778	0.199568
NEDD4	168.851	-0.78688	0.352905	-2.22972	0.0257657	0.201615
SPCS1	146.836	-0.726109	0.325713	-2.22929	0.0257944	0.201615
LOC100288842	45.0582	-1.36359	0.611775	-2.2289	0.0258206	0.201615
ANP32A	396.418	-0.630947	0.283108	-2.22865	0.0258374	0.201615
CEP85L	26.7744	-1.24567	0.55894	-2.22864	0.0258382	NA
MTO1	136.8	-0.690101	0.309738	-2.22802	0.0258794	0.201751
MLL5	416.261	-0.616365	0.276732	-2.2273	0.0259271	0.201903
PKD1	101.466	1.32796	0.596305	2.22699	0.0259481	0.201903
LOC100128023	2.79865	-4.2124	1.8924	-2.22595	0.0260174	NA
DGAT2	32.7165	1.12498	0.505463	2.22565	0.0260379	0.20241
LOC401127	5.47752	-2.97347	1.33603	-2.2256	0.0260412	NA
DNAJC25	44.5587	-1.12663	0.506464	-2.22449	0.0261153	0.20282
SLC30A9	219.094	-0.719343	0.323577	-2.22309	0.0262094	0.203359
MAP2K2	91.1352	0.757599	0.340878	2.22249	0.0262501	0.203482
ZNF282	66.5109	0.843875	0.380027	2.22056	0.0263805	0.204299
FAM190B	253.513	-0.6986	0.314685	-2.22	0.0264191	0.204405
NME3	32.9411	1.12996	0.509135	2.21937	0.0264618	0.204543
NOMO2	131.279	0.796157	0.358929	2.21815	0.0265448	0.204783
CDS1	51.9981	-1.00268	0.452082	-2.2179	0.0265614	0.204783
RAC3	170.467	0.662246	0.298683	2.21722	0.026608	0.204783
KIAA0020	436.193	-0.602876	0.27191	-2.21719	0.0266101	0.204783
PHF3	140.066	-0.978828	0.441494	-2.21708	0.0266175	0.204783
SMYD5	90.969	0.786267	0.354985	2.21493	0.0267648	0.205427
ZNF286A	40.6808	-1.06841	0.482373	-2.21491	0.0267665	0.205427
HIP1	80.6439	0.895794	0.404474	2.21471	0.0267799	0.205427
OXR1	125.894	-0.76617	0.345995	-2.2144	0.0268013	0.205427
MRPL1	24.5049	-1.24422	0.561924	-2.21421	0.026814	NA
CCNYL1	70.9562	-1.01848	0.460228	-2.21298	0.0268989	0.205809
CHPT1	65.2555	-0.851168	0.384631	-2.21295	0.0269014	0.205809
TOM1L2	101.556	0.735122	0.332299	2.21223	0.0269507	0.205992
TPRA1	103.42	0.959219	0.433668	2.21187	0.0269754	0.205992
SLC39A1	110.868	0.867143	0.392284	2.2105	0.0270706	0.206526
LRCH3	159.289	-0.700496	0.316986	-2.20986	0.0271147	0.206591
POLR2A	506.08	0.836823	0.378713	2.20965	0.0271294	0.206591
DNAJB7	29.1381	-1.45421	0.658159	-2.20951	0.0271391	NA
OGFRL1	42.1269	-1.25353	0.567436	-2.20911	0.0271671	0.206687
ZNF596	31.591	-1.23872	0.561132	-2.20754	0.0272764	0.207326
CERS2	212.02	0.815739	0.369587	2.20716	0.0273026	0.207333
PIP5K1C	78.723	0.746101	0.338221	2.20596	0.027387	0.207782
AGAP3	83.876	0.897198	0.406803	2.20548	0.0274201	0.207821
RNF115	222.151	-0.819145	0.371467	-2.20516	0.0274428	0.207821
EEF1E1	632.589	-0.763591	0.346362	-2.20461	0.0274818	0.207925
OTUD3	32.9565	-1.07512	0.487803	-2.204	0.0275241	0.208053
NCS1	241.014	0.685617	0.311245	2.20282	0.0276074	0.20849
OR1F2P	3.02922	-4.32945	1.9661	-2.20205	0.0276618	NA
TSPAN14	68.2042	1.21201	0.550482	2.20173	0.0276846	0.208881
ACOT13	166.138	-0.873688	0.397002	-2.20071	0.0277564	0.209231
ARL15	28.1225	-1.15923	0.526777	-2.20061	0.0277633	NA
PBOV1	8.50139	-2.53742	1.15345	-2.19984	0.027818	NA
UNC45A	173.446	0.687297	0.312566	2.19889	0.0278859	0.210014
TBC1D12	157.485	-1.10803	0.503997	-2.19849	0.0279145	0.210037
KIAA0664	211.171	0.707194	0.321798	2.19763	0.0279752	0.210272
WDR18	128.923	0.697015	0.317211	2.19733	0.027997	0.210272
TTC7B	62.5914	0.868745	0.395688	2.19553	0.0281254	0.211044
ADPRHL2	31.7282	1.01687	0.463372	2.19451	0.0281987	0.2114
EML5	13.8183	-1.75142	0.798246	-2.19408	0.0282295	NA
EIF4G3	302.276	-0.851718	0.388633	-2.19158	0.0284102	0.21241
UBAC1	37.8881	1.05799	0.482791	2.19141	0.0284222	0.21241
CD274	42.2369	-1.1502	0.524876	-2.19137	0.0284251	0.21241
VPS29	313.761	-0.736883	0.336305	-2.19111	0.0284437	0.21241
TBL3	72.9377	0.754231	0.344287	2.19071	0.0284731	0.21241
TTC37	71.8059	-0.823348	0.375874	-2.19049	0.0284886	0.21241
SLC41A1	90.5702	0.873652	0.398911	2.19009	0.0285174	0.212414
ALG13	88.7754	-1.16428	0.531718	-2.18965	0.0285496	0.212414
TMEM141	77.0408	0.790155	0.360904	2.18937	0.0285696	0.212414
ANKFN1	7.3264	-2.35551	1.0759	-2.18933	0.0285728	NA
SERPINE2	551.232	0.666779	0.304697	2.18834	0.0286451	0.212414
ZNF195	69.7112	-0.978929	0.447381	-2.18813	0.0286599	0.212414
ADIPOR2	110.974	0.786574	0.359509	2.18791	0.0286761	0.212414
NOMO3	176.801	0.806397	0.368576	2.18787	0.028679	0.212414
RIOK2	93.5326	-0.873105	0.399115	-2.1876	0.0286985	0.212414
PARP8	102.499	-0.738551	0.337697	-2.18702	0.0287408	0.212414
DNASE2	126.981	0.834948	0.381849	2.18659	0.0287722	0.212414
SLC1A5	469.761	0.59081	0.27022	2.18641	0.0287858	0.212414
RAP1GAP2	250.114	0.624199	0.285525	2.18614	0.0288053	0.212414
PAPOLB	8.12719	-2.4718	1.13081	-2.18587	0.0288251	NA
RFX1	70.8929	0.764058	0.349545	2.18586	0.0288256	0.212414
NOTCH2	140.386	0.71255	0.326086	2.18516	0.0288772	0.212461
AMBRA1	52.0883	0.941211	0.430746	2.18507	0.0288837	0.212461
SRP19	15.903	-1.46072	0.66879	-2.18412	0.0289534	NA
TPI1	514.742	0.77755	0.356034	2.18392	0.028968	0.212889
TMCO1	319.285	-0.698777	0.320016	-2.18357	0.0289938	0.212889
MTX2	253.086	-0.811312	0.371629	-2.18312	0.0290269	0.212942
PBXIP1	31.4609	1.15643	0.529906	2.18234	0.0290847	0.213041
ATPBD4	78.096	-0.892056	0.408782	-2.18223	0.0290924	0.213041
ALKBH4	27.3675	1.12023	0.513606	2.1811	0.029176	NA
KIF27	51.935	-1.13898	0.522207	-2.18109	0.029177	0.21347
P4HB	2477.65	0.572438	0.262573	2.18011	0.0292494	0.213809
HN1	221.333	0.884316	0.405712	2.17966	0.0292825	0.213861
MON1A	17.8304	1.51525	0.695182	2.17965	0.0292836	NA
OR2A20P	61.1568	-1.20869	0.554709	-2.17896	0.0293348	0.213887
ZC3H6	39.4887	-1.21421	0.557257	-2.17891	0.0293382	0.213887
SLC2A6	17.0202	1.50603	0.691466	2.17803	0.029404	NA
FNIP1	164.654	-0.70016	0.321515	-2.17769	0.0294289	0.214359
TMEM187	12.1002	1.56105	0.717237	2.17648	0.0295196	NA
SPPL2C	2.95832	-4.29444	1.97322	-2.17636	0.0295282	NA
BTAF1	198.216	-0.740028	0.340096	-2.17594	0.0295597	0.214795
UBQLNL	11.8613	-2.01215	0.924729	-2.17593	0.0295604	NA
BMP2K	73.3366	-0.806337	0.370586	-2.17585	0.0295668	0.214795
CNOT2	271.052	-0.702431	0.322833	-2.17584	0.0295674	0.214795
LRRC37B	25.3036	-1.18546	0.545686	-2.17243	0.0298232	NA
REXO1L2P	190.641	-4.16759	1.92113	-2.16935	0.0300563	0.217974
PTPLB	257.845	-0.66274	0.305505	-2.16932	0.0300581	0.217974
SGK110	3.46052	3.27538	1.51081	2.16797	0.0301611	NA
FKBP8	94.4155	1.11908	0.516213	2.16786	0.0301696	0.218179
TPRG1	25.666	-1.31221	0.60557	-2.16691	0.030242	NA
FBXO30	86.2244	-0.747853	0.345141	-2.1668	0.0302499	0.218179
PHC3	193.55	-0.66394	0.306429	-2.1667	0.0302578	0.218179
ZNF182	38.7174	-1.10726	0.511056	-2.16661	0.0302643	0.218179
GDI2	646.536	-0.526653	0.243085	-2.16654	0.0302698	0.218179
C1orf106	40.244	1.05484	0.486881	2.16654	0.0302703	0.218179
HLA-DRA	38.9916	1.61243	0.744345	2.16624	0.0302929	0.218179
THUMPD2	89.3924	-0.761177	0.351395	-2.16616	0.0302989	0.218179
2022-09-03	44.1044	0.974158	0.449849	2.16552	0.0303477	0.218269
DKFZP586I1420	23.215	-1.23532	0.570487	-2.16538	0.0303589	NA
PRPF39	207.287	-0.641996	0.296526	-2.16506	0.0303831	0.218269
DGKQ	59.6393	0.848911	0.392115	2.16495	0.0303913	0.218269
CDC45	18.263	1.48983	0.688471	2.16397	0.0304664	NA
RRP15	93.1209	-0.802321	0.370834	-2.16356	0.0304983	0.218846
LONP2	164.474	-0.67754	0.313408	-2.16185	0.0306299	0.219343
ZNF320	155.631	-0.844195	0.390537	-2.16163	0.030647	0.219343
UNC119B	49.7996	1.02849	0.475797	2.16162	0.0306476	0.219343
USP15	88.5944	-0.76057	0.352025	-2.16056	0.0307296	0.219556
LRCH4	58.7894	0.797684	0.369277	2.16012	0.0307632	0.219556
RPL26L1	210.605	-0.812673	0.376228	-2.16006	0.0307684	0.219556
CPSF4	88.7101	0.743229	0.344161	2.15954	0.0308084	0.219556
EFCAB10	7.57351	-2.18024	1.00983	-2.15901	0.0308492	NA
ZFP1	44.9964	-1.1198	0.518705	-2.15884	0.0308628	0.219556
OLFM2	38.2057	1.13835	0.52735	2.15862	0.0308798	0.219556
FUBP1	555.487	-0.789484	0.365756	-2.1585	0.0308891	0.219556
SIX4	242.616	-0.701622	0.325079	-2.15832	0.0309033	0.219556
NLE1	71.9437	0.862091	0.399475	2.15806	0.0309229	0.219556
PGBD4	25.9457	-1.44503	0.669663	-2.15785	0.0309398	NA
PDE4B	303.14	0.783716	0.363204	2.15778	0.0309448	0.219556
FBXW12	2.81535	-4.25114	1.9702	-2.15772	0.0309496	NA
GAMT	67.9616	0.876379	0.406467	2.15609	0.0310768	0.220302
TRIB3	775.33	0.540354	0.250681	2.15554	0.0311193	0.220413
MTHFD2L	24.2382	-1.40767	0.653218	-2.15498	0.0311632	NA
RAVER1	85.6579	0.782944	0.363336	2.15487	0.0311716	0.22057
FAM171A2	20.5741	1.19573	0.554933	2.15474	0.0311825	NA
TAS2R20	24.2397	-1.52569	0.708077	-2.15469	0.0311863	NA
PPP2R1A	140.431	0.858525	0.398466	2.15457	0.0311953	0.22057
BRCA2	19.217	-1.37139	0.636528	-2.15449	0.0312019	NA
CHCHD3	348.185	-0.621035	0.288287	-2.15423	0.0312223	0.220571
CTTNBP2NL	97.1853	-0.906636	0.421175	-2.15263	0.0313474	0.221191
VN1R4	5.48371	-4.0923	1.90107	-2.15263	0.0313479	NA
CNST	22.7992	-1.21942	0.566547	-2.15237	0.031368	NA
C16orf87	63.7659	-0.996241	0.462945	-2.15196	0.0314004	0.221191
CKAP2	79.6793	-0.767455	0.356658	-2.15179	0.0314135	0.221191
YY2	32.0084	-1.1652	0.541516	-2.15174	0.0314178	0.221191
WDR5B	69.0262	-0.883227	0.410646	-2.15083	0.03149	0.221509
TTC3	109.293	-0.795678	0.370071	-2.15007	0.0315497	0.221739
EHD1	151.136	0.618156	0.287647	2.14901	0.0316339	0.222141
FAM110C	133.336	-0.970738	0.451839	-2.14842	0.0316807	0.222279
KCTD17	45.0959	0.887625	0.413376	2.14726	0.0317728	0.222735
ANKRD20A8P	9.40327	-1.99205	0.927883	-2.14688	0.0318028	NA
SEPN1	102.437	0.760237	0.354168	2.14655	0.0318294	0.222866
ZFX	159.82	-0.75331	0.351049	-2.14588	0.0318822	0.222866
NFAT5	740.138	-0.582692	0.271565	-2.14568	0.0318984	0.222866
LAMTOR4	46.3172	0.980275	0.456864	2.14566	0.0319	0.222866
HSPH1	172.334	-0.721286	0.336274	-2.14494	0.031958	0.223081
BRWD1	382.607	-0.653283	0.30471	-2.14395	0.0320368	0.223441
IRF1	135.164	-0.704155	0.32856	-2.14315	0.0321007	0.223696
CCDC50	232.945	-0.701549	0.327405	-2.14276	0.0321326	0.223729
LRP3	11.0734	1.82348	0.851588	2.14127	0.0322523	NA
LIG3	58.6485	0.86848	0.405705	2.14067	0.032301	0.224654
TAMM41	101.568	-0.889279	0.415468	-2.14043	0.0323201	0.224654
PDCD2	228.107	-0.580884	0.271449	-2.13994	0.0323595	0.224684
ZNF614	4.54114	-3.01045	1.40684	-2.13986	0.0323658	NA
SNRK	77.2451	-0.954393	0.446043	-2.13969	0.03238	0.224684
AP3D1	99.1054	0.736483	0.34428	2.1392	0.0324199	0.224684
DIRC2	81.6457	-0.754432	0.3527	-2.13902	0.032434	0.224684
LOC100289495	17.6407	-1.57273	0.735433	-2.13851	0.0324756	NA
LARP1B	119.927	-0.833519	0.389898	-2.13779	0.0325338	0.224904
MAPK3	139.784	0.631076	0.295219	2.13766	0.0325447	0.224904
CAB39	196.41	-0.673493	0.315067	-2.13762	0.0325479	0.224904
MSI1	82.8241	0.819323	0.383371	2.13716	0.0325853	0.224973
ARFIP1	104.44	-0.8644	0.404634	-2.13625	0.0326589	0.225109
WDR67	50.1957	-0.925807	0.433479	-2.13576	0.0326991	0.225109
ERBB3	63.6549	0.870922	0.407801	2.13566	0.0327075	0.225109
CNTRL	31.5433	-1.19643	0.560303	-2.13532	0.0327348	0.225109
ANKMY2	163.544	-0.713901	0.334344	-2.13523	0.0327422	0.225109
CSPG4	22.3728	1.31899	0.617895	2.13464	0.0327901	NA
WTIP	41.0376	1.00464	0.470708	2.13431	0.0328177	0.22544
MCOLN1	36.8135	1.22385	0.573716	2.1332	0.0329087	0.225649
GRHL2	91.8693	-0.878554	0.411894	-2.13297	0.0329276	0.225649
FANCG	50.2375	0.892562	0.418468	2.13293	0.0329306	0.225649
OR10AD1	3.39266	-4.49522	2.10774	-2.13272	0.0329477	NA
CDK2	195.769	0.796891	0.373704	2.13241	0.0329728	0.225749
TRIM23	116.624	-0.847369	0.397557	-2.13144	0.0330528	0.225939
PTPN2	233.106	-0.906598	0.425351	-2.13141	0.0330555	0.225939
C16orf46	7.43664	-2.10826	0.989412	-2.13082	0.0331039	NA
CLK1	276.978	-0.690226	0.323936	-2.13075	0.03311	0.226113
CXADRP2	5.09506	-3.82816	1.79704	-2.13025	0.0331506	NA
C12orf57	240.904	0.605447	0.284237	2.13008	0.0331649	0.226113
GPCPD1	122.793	-0.873464	0.41011	-2.12983	0.0331857	0.226113
ALG8	51.335	0.966376	0.453748	2.12976	0.0331912	0.226113
CAPNS1	635.692	0.558324	0.262246	2.12901	0.0332535	0.22621
BTBD1	1269.7	-0.657311	0.308789	-2.12868	0.033281	0.22621
NCLN	116.227	0.670267	0.314887	2.12859	0.033288	0.22621
TXNRD3	110.323	-0.921385	0.43297	-2.12806	0.0333324	0.226324
CENPC1	26.628	-1.19007	0.559379	-2.12748	0.0333803	NA
CHD2	232.722	-0.765075	0.359838	-2.12617	0.0334894	0.227202
LOC641515	4.92105	-3.9176	1.84293	-2.12574	0.0335249	NA
YTHDC2	41.8666	-1.15747	0.544544	-2.12557	0.0335394	0.227353
WDR78	14.3826	-1.61318	0.759408	-2.12426	0.0336485	NA
SORD	102.06	0.994368	0.468119	2.12418	0.0336552	0.227945
THOC1	47.2062	-0.936077	0.440796	-2.12361	0.033703	0.227945
SPATA31C1	2.81652	-4.22171	1.98827	-2.12331	0.0337281	NA
TTC19	252.125	-0.650991	0.306593	-2.12331	0.0337283	0.227945
DLD	318.939	-0.638283	0.300624	-2.12319	0.0337377	0.227945
TCF12	283.436	-0.664747	0.31314	-2.12284	0.0337669	0.227954
C19orf25	24.3138	1.30691	0.615687	2.12268	0.0337803	NA
GPAA1	72.3706	0.75833	0.357481	2.12131	0.0338954	0.228634
FIGF	3.76599	-3.50744	1.65444	-2.12002	0.0340046	NA
IRF3	120.381	0.674943	0.318514	2.11904	0.0340872	0.228903
MGC16025	43.771	-1.45862	0.688405	-2.11884	0.0341044	0.228903
DKFZP434I0714	31.651	-1.2933	0.610409	-2.11875	0.034112	0.228903
MTMR1	124.937	0.934291	0.441009	2.11853	0.0341301	0.228903
PPP1R26	59.7898	0.8448	0.398844	2.11812	0.0341647	0.228903
STXBP1	275.129	0.698632	0.329843	2.11807	0.0341687	0.228903
C8orf40	62.141	-0.977788	0.461646	-2.11805	0.0341712	0.228903
DDX11-AS1	13.1287	-1.63931	0.774169	-2.11751	0.0342162	NA
CRBN	137.284	-0.688472	0.325137	-2.11748	0.0342189	0.228903
FLJ16779	4.66438	-4.02358	1.90035	-2.11728	0.0342358	NA
MED19	326.944	-1.01221	0.478112	-2.1171	0.034251	0.228903
NAT14	45.8603	0.990657	0.468025	2.11668	0.0342874	0.228903
EID3	113.486	-1.01718	0.480593	-2.1165	0.0343022	0.228903
CAPN1	101.729	1.04969	0.495959	2.11648	0.0343042	0.228903
PFN2	432.506	-0.534366	0.252487	-2.11641	0.0343097	0.228903
ATP8B3	77.2475	0.777629	0.367461	2.11623	0.0343257	0.228903
ZNF440	19.9963	-1.2504	0.591101	-2.11538	0.0343979	NA
LOC100272217	19.5656	-1.89966	0.898269	-2.11481	0.0344465	NA
CDC42EP4	15.5347	1.35256	0.639648	2.11453	0.0344696	NA
CCT6P3	42.6421	-0.944511	0.446801	-2.11394	0.0345204	0.229425
AAAS	52.6509	0.933342	0.44153	2.11388	0.0345252	0.229425
IPO8	250.443	-0.757677	0.35848	-2.11358	0.0345509	0.229425
NEXN	5.72058	-2.73494	1.29409	-2.11341	0.0345656	NA
DLG5	319.816	0.583861	0.276298	2.11316	0.0345874	0.229425
KIAA0930	107.294	0.932042	0.44108	2.11309	0.034593	0.229425
RETSAT	204.683	0.604696	0.286169	2.11307	0.0345947	0.229425
MATR3	904.185	-0.596836	0.28246	-2.11299	0.0346017	0.229425
CPT2	21.0255	1.36614	0.646602	2.11281	0.0346172	NA
C1orf52	88.1251	-0.817381	0.386891	-2.11269	0.0346275	0.229425
ULK4	36.8598	-1.13795	0.538722	-2.11231	0.0346597	0.229451
RSL1D1	855.867	-0.516798	0.244705	-2.11192	0.0346935	0.229451
PXN	314.492	0.589742	0.279278	2.11166	0.0347153	0.229451
MAP3K2	153.519	-0.656476	0.310956	-2.11115	0.0347592	0.22947
LYAR	565.788	-0.659728	0.312522	-2.11098	0.0347741	0.22947
SNORA71D	471.911	1.12491	0.533073	2.11024	0.0348378	0.229544
FBXO11	220.313	-0.597866	0.283322	-2.1102	0.0348412	0.229544
IFT57	34.8534	-1.01177	0.479875	-2.1084	0.0349962	0.230154
TBK1	182.67	-0.787055	0.373302	-2.10836	0.0349997	0.230154
DDX1	138.357	-0.715707	0.339495	-2.10815	0.0350179	0.230154
KIF3A	57.0446	-0.884521	0.419661	-2.1077	0.0350567	0.230225
TYRO3	40.4357	1.00365	0.476418	2.10665	0.0351477	0.230637
RYBP	80.0858	-0.752773	0.357456	-2.10592	0.0352115	0.230855
LDLR	628.797	0.54102	0.25694	2.10562	0.0352371	0.230855
LINC00167	5.91961	-2.77632	1.31863	-2.10546	0.035251	NA
ATP6V0B	20.6436	1.51169	0.718072	2.1052	0.0352739	NA
FAM177A1	51.792	-0.865221	0.411284	-2.1037	0.0354042	0.231765
GLRX3	120.449	-0.693894	0.329939	-2.10309	0.0354575	0.231929
KIAA1033	15.3549	-1.51087	0.718512	-2.10278	0.0354849	NA
AP1M2	121.166	0.844656	0.401777	2.1023	0.0355267	0.232196
CARM1	245.04	0.629824	0.299667	2.10175	0.0355752	0.232328
LRRIQ1	3.95458	-2.92808	1.39339	-2.10141	0.0356049	NA
UTRN	69.2035	-0.804546	0.382924	-2.10106	0.0356358	0.232451
LRFN4	14.397	1.81179	0.862584	2.10042	0.0356922	NA
MXRA7	35.3635	0.997689	0.475045	2.1002	0.0357112	0.232451
ARID2	108.334	-0.765292	0.364415	-2.10005	0.035724	0.232451
POLI	39.3086	-1.18359	0.563618	-2.09998	0.0357304	0.232451
COL1A1	70.2119	-0.880107	0.419114	-2.09992	0.0357355	0.232451
FOXK1	85.8297	0.70835	0.337652	2.09787	0.0359169	0.233445
CREB1	185.184	-0.662001	0.315672	-2.09712	0.035983	0.233593
TBL1XR1	604.124	-0.516764	0.246444	-2.09689	0.0360036	0.233593
HIST1H3J	280.245	1.1447	0.545965	2.09665	0.036025	0.233593
TOX2	84.1642	0.762275	0.363665	2.09609	0.0360739	0.233726
LOC731275	164.385	-0.673565	0.321485	-2.09516	0.0361564	0.234075
HOXA5	24.7928	-1.32386	0.631893	-2.09507	0.0361645	NA
B4GALNT3	21.5782	1.19829	0.572113	2.09449	0.0362164	NA
ZNF624	22.3963	-1.44719	0.691057	-2.09417	0.0362448	NA
KRTAP5-1	8.60378	-2.10578	1.00574	-2.09375	0.036282	NA
SH3GLB2	283.971	0.655901	0.313367	2.09308	0.0363424	0.234825
NUBPL	36.9534	-1.08076	0.51636	-2.09303	0.0363466	0.234825
MYBBP1A	190.444	0.670068	0.320209	2.0926	0.0363852	0.234825
SUN2	34.5368	1.07411	0.513312	2.09251	0.0363932	0.234825
IMPDH1	116.919	0.696009	0.332676	2.09216	0.0364246	0.234825
ME1	483.5	-0.670073	0.32036	-2.09162	0.0364722	0.234825
ASAH2B	51.2676	-0.978227	0.467756	-2.09132	0.0364995	0.234825
IRF5	38.3707	0.973403	0.465488	2.09114	0.0365151	0.234825
LOC100130987	13.0066	1.53072	0.732158	2.0907	0.0365551	NA
RNASEK	116.867	0.712277	0.340758	2.09027	0.0365936	0.234825
AVPI1	84.967	0.83324	0.398648	2.09017	0.0366028	0.234825
TGS1	122.877	-0.691027	0.330622	-2.09008	0.0366104	0.234825
HTATSF1	85.1048	-0.791576	0.37874	-2.09003	0.0366155	0.234825
VN1R2	3.30667	-4.46338	2.13578	-2.08981	0.0366349	NA
PSTPIP2	173.819	-0.975792	0.467074	-2.08916	0.0366935	0.235142
TRAF3IP1	111.521	-0.786499	0.376734	-2.08768	0.0368271	0.23564
KIAA1598	408.703	-0.941627	0.451045	-2.08766	0.0368286	0.23564
XRCC1	56.8748	0.927634	0.444457	2.08711	0.0368778	0.235771
GTPBP6	29.0972	1.16943	0.560333	2.08702	0.0368862	NA
ZRANB3	26.1064	-1.12571	0.539448	-2.08679	0.0369075	NA
ICA1	126.056	-0.851167	0.407884	-2.08679	0.0369075	0.235777
ERF	121.386	0.678816	0.325392	2.08615	0.0369649	0.235844
SLPI	61.2427	-0.854489	0.409667	-2.08581	0.0369957	0.235844
PI4KB	48.4401	0.948227	0.454628	2.08572	0.0370042	0.235844
PHF23	168.587	0.77851	0.373695	2.08328	0.0372258	0.23703
HOXB7	149.734	-0.770055	0.369679	-2.08304	0.0372479	0.23703
GPR135	18.8473	-1.43174	0.68861	-2.07917	0.0376015	NA
TWISTNB	185.049	-0.761321	0.366218	-2.07887	0.0376291	0.23927
PLXND1	28.1443	1.10459	0.531647	2.07767	0.0377399	NA
OR52K1	2.73053	-4.18578	2.01556	-2.07674	0.037826	NA
REST	222.202	-0.767868	0.369762	-2.07666	0.0378332	0.240382
USP36	514.9	0.5526	0.26615	2.07627	0.0378687	0.240421
LOC255512	5.44462	-2.54606	1.22667	-2.07559	0.0379319	NA
ZNF268	34.308	-1.14543	0.551914	-2.07537	0.0379521	0.240764
FAM206A	73.1629	-0.774636	0.373518	-2.07389	0.0380893	0.241448
CNOT6L	123.09	-0.718535	0.346681	-2.07261	0.0382087	0.241832
EHBP1L1	151.29	0.62892	0.303456	2.07252	0.0382169	0.241832
LAMB1	46.2538	0.932641	0.450053	2.07229	0.0382382	0.241832
PROM2	19.757	1.37851	0.665232	2.07222	0.0382449	NA
SP100	429.251	-0.961587	0.464233	-2.07134	0.0383266	0.242006
STAG1	50.8596	-1.06244	0.513042	-2.07085	0.0383724	0.242006
ZNF639	135.116	-0.642543	0.310295	-2.07075	0.0383822	0.242006
ARHGEF40	4.65431	2.36353	1.14142	2.0707	0.0383869	NA
TCF3	113.769	0.681507	0.329143	2.07055	0.0384008	0.242006
ASNS	913.808	-0.570156	0.275382	-2.07042	0.0384131	0.242006
RASA4	34.322	1.13409	0.548013	2.06946	0.0385033	0.242388
RAB8B	312.218	-1.07612	0.520195	-2.06868	0.0385757	0.242503
ZFP91	796.646	-0.668379	0.323102	-2.06863	0.0385808	0.242503
SF3A1	268.728	0.784955	0.37964	2.06763	0.0386746	0.242907
CCDC8	3.23577	-4.43182	2.14348	-2.06758	0.0386792	NA
STRN3	330.27	-0.602608	0.291539	-2.06699	0.0387355	0.243104
FLJ22184	17.0173	1.29633	0.627559	2.06567	0.0388596	NA
BAZ2B	59.4831	-0.815736	0.394927	-2.06553	0.0388725	0.243625
ARAP2	59.0597	-0.840348	0.406939	-2.06505	0.0389186	0.243625
ANKRD29	36.1551	-1.01906	0.493495	-2.06498	0.0389245	0.243625
SNORA55	81.301	-0.907738	0.439633	-2.06476	0.0389453	0.243625
BSDC1	70.8602	0.871629	0.422192	2.06454	0.038967	0.243625
PARP2	57.7109	-0.922072	0.447013	-2.06274	0.039137	0.244339
FLVCR2	6.99403	1.95745	0.949059	2.06252	0.0391582	NA
SEC24B	196.864	-0.772282	0.374436	-2.06252	0.0391583	0.244339
TRAP1	190.342	0.65276	0.316519	2.06231	0.0391781	0.244339
LLGL2	25.3719	1.07627	0.521912	2.06217	0.0391913	NA
NRBF2	127.05	-0.727756	0.352924	-2.06208	0.0392002	0.244339
LOC389791	6.09497	-3.16025	1.53303	-2.06144	0.0392607	NA
UIMC1	67.5589	-0.811201	0.393529	-2.06135	0.0392695	0.244427
SCARA3	20.9211	1.4241	0.691015	2.06089	0.039314	NA
ATP5J2	693.565	0.508153	0.246606	2.06059	0.0393421	0.244427
ZNF711	45.0266	-0.927525	0.450158	-2.06044	0.0393563	0.244427
FEM1C	129.052	-0.71586	0.347473	-2.06019	0.0393804	0.244427
UFL1	178.216	-0.739246	0.358858	-2.05999	0.039399	0.244427
ZNF148	50.6504	-0.982879	0.477146	-2.05991	0.0394069	0.244427
WAPAL	156.101	-0.645789	0.313528	-2.05975	0.0394227	0.244427
TAF7	357.453	-0.618876	0.300509	-2.05943	0.0394535	0.244433
CCDC62	2.36432	-3.95974	1.92308	-2.05906	0.0394885	NA
ZXDA	32.0547	-1.07417	0.521789	-2.05863	0.0395301	0.24455
APBA3	51.3228	0.877488	0.426254	2.05861	0.039532	0.24455
HIST1H2AM	235.565	0.698282	0.33943	2.05722	0.039665	0.245188
GPR45	4.04783	-3.6548	1.77716	-2.05654	0.0397309	NA
MYCL1	23.588	-1.28505	0.624917	-2.05636	0.0397478	NA
CLN3	58.7961	0.941442	0.457909	2.05596	0.0397864	0.245754
RPA4	6.14914	-2.44356	1.18873	-2.05561	0.0398201	NA
LOC282997	7.4734	-2.82392	1.37398	-2.05528	0.0398518	NA
ADRM1	272.29	0.564403	0.274676	2.0548	0.0398986	0.246076
SLC9A3R1	105.245	0.726053	0.353375	2.05463	0.0399152	0.246076
CUL4B	491.437	-0.751897	0.365978	-2.05449	0.0399285	0.246076
HMGXB3	67.6085	1.0275	0.500331	2.05363	0.0400115	0.246402
ACADS	12.0007	1.50924	0.735067	2.0532	0.0400531	NA
CA4	4.38078	-3.92984	1.91431	-2.05287	0.0400851	NA
FAM109A	5.51145	2.40109	1.16992	2.05235	0.0401361	NA
UBE2Q2P2	25.7506	-1.35853	0.66205	-2.05201	0.0401687	NA
INTS2	101.49	-0.70017	0.341219	-2.05197	0.0401728	0.247211
CCDC3	15.485	1.33452	0.65065	2.05105	0.0402618	NA
DDX6	431.14	-0.634125	0.309184	-2.05096	0.0402706	0.247626
ZNF80	4.43659	-3.95347	1.93035	-2.04806	0.0405544	NA
RBM45	36.1983	-0.989759	0.483441	-2.04732	0.0406265	0.249502
SNX25	137.995	-0.662905	0.323811	-2.0472	0.0406387	0.249502
RPRD1A	294.793	-0.693028	0.338573	-2.04691	0.0406668	0.249502
METAP2	524.416	-0.52231	0.255255	-2.04623	0.040734	0.249727
PPM1F	17.2167	1.48911	0.728097	2.04521	0.0408342	NA
SCARNA5	293.265	0.752152	0.367774	2.04515	0.0408401	0.250191
ARHGEF11	100.369	0.722601	0.353429	2.04455	0.0408996	0.250369
STH	10.4971	-2.19985	1.07616	-2.04417	0.0409367	NA
ABHD2	82.4441	0.71878	0.35171	2.04367	0.0409857	0.250709
PECAM1	3.0928	-4.38562	2.14663	-2.04302	0.0410504	NA
KRTAP17-1	3.08343	-4.33409	2.12245	-2.04203	0.0411488	NA
ZFP36L2	113.764	0.653271	0.320209	2.04014	0.0413363	0.252492
TFCP2L1	30.8971	1.0621	0.520625	2.04005	0.041345	0.252492
CHMP4C	225.913	-0.841497	0.412589	-2.03955	0.041395	0.252492
RPL14	41.5295	-0.952731	0.467139	-2.0395	0.0414002	0.252492
ZNF271	123.12	-0.911224	0.446942	-2.0388	0.0414702	0.252731
KLHL21	25.4922	1.19204	0.584958	2.03783	0.0415674	NA
RHOBTB2	25.7313	1.24731	0.612307	2.03706	0.0416439	NA
SLC35G3	3.73374	-3.68659	1.80986	-2.03695	0.0416554	NA
GCFC2	35.639	-1.10104	0.54061	-2.03666	0.0416842	0.253464
VPS51	72.168	0.762442	0.3745	2.03589	0.0417612	0.253464
MNT	52.1691	0.796597	0.391289	2.03583	0.0417676	0.253464
GMPR2	173.446	0.726668	0.356958	2.03573	0.0417778	0.253464
JRKL	30.7198	-1.06618	0.523762	-2.03561	0.0417892	0.253464
TMIE	32.2458	-1.32355	0.650213	-2.03557	0.0417937	0.253464
HIST1H4H	46.2136	0.880278	0.432476	2.03544	0.0418071	0.253464
KBTBD2	105.468	-0.712664	0.350213	-2.03494	0.0418567	0.253464
ZCCHC9	58.3812	-0.804048	0.395143	-2.03483	0.0418684	0.253464
LOC148696	5.11319	-2.97713	1.46363	-2.03408	0.0419436	NA
DIMT1	75.126	-0.755532	0.371633	-2.033	0.0420522	0.254389
CDC42EP5	2.39612	3.48721	1.71589	2.03231	0.0421226	NA
LOC440925	5.81723	-2.64547	1.30176	-2.03222	0.0421312	NA
C17orf85	336.978	-0.724973	0.356756	-2.03213	0.0421407	0.254602
GMFB	151.636	-0.675806	0.332575	-2.03204	0.0421498	0.254602
GPRC5C	91.6788	0.840952	0.413924	2.03166	0.0421884	0.254602
ZNF708	24.9871	-1.26318	0.621813	-2.03145	0.0422093	NA
LZTR1	111.685	0.8147	0.401145	2.03094	0.0422614	0.254602
TADA3	108.183	0.917613	0.451852	2.03078	0.0422773	0.254602
FGF2	27.6729	-1.34315	0.661452	-2.03061	0.042295	NA
MAPK1	177.234	0.744765	0.366837	2.03023	0.0423327	0.254602
PPT1	121.208	0.6612	0.325845	2.02918	0.0424396	0.254602
SNORA7B	321.195	-0.973352	0.479724	-2.02898	0.0424599	0.254602
SYF2	504.46	-0.75825	0.373716	-2.02895	0.0424638	0.254602
C9orf163	4.57312	-3.62438	1.78634	-2.02895	0.0424639	NA
UTP23	161.212	-0.672469	0.33144	-2.02894	0.0424649	0.254602
WHSC1	111.834	0.68139	0.335939	2.02832	0.0425279	0.254602
SLC29A4	44.8511	1.01652	0.501332	2.02764	0.0425974	0.254602
EFCAB7	29.9547	-1.08006	0.53267	-2.02763	0.0425979	0.254602
VRK1	246.513	-0.561245	0.276811	-2.02754	0.0426075	0.254602
AHCY	182.659	0.970548	0.478687	2.02752	0.042609	0.254602
SKAP2	161.262	-0.70386	0.347161	-2.02747	0.042614	0.254602
C2orf47	122.883	-0.873082	0.430902	-2.02617	0.042747	0.254602
VEZF1	212.714	-0.769039	0.379574	-2.02606	0.0427591	0.254602
GORAB	49.0024	-0.943612	0.46575	-2.02601	0.042764	0.254602
TYK2	50.8821	0.872487	0.430661	2.02593	0.0427722	0.254602
AGRN	112.867	0.697013	0.344094	2.02565	0.0428009	0.254602
HERC4	156.099	-0.67674	0.334112	-2.02549	0.0428174	0.254602
BCL9L	94.8936	0.661877	0.3268	2.02533	0.0428338	0.254602
DNAJC11	263.053	0.674544	0.333063	2.02528	0.0428389	0.254602
GULP1	405.494	-0.55113	0.272157	-2.02505	0.0428627	0.254602
ZNF193	26.8985	-1.1065	0.546424	-2.02499	0.0428687	NA
UBE2V2	485.264	-0.532391	0.262946	-2.02472	0.0428965	0.254618
BCAT2	92.0406	0.719839	0.355612	2.02423	0.0429467	0.254732
VPS45	104.4	-0.693494	0.34267	-2.0238	0.042991	0.254811
MTFP1	51.5034	0.958709	0.473836	2.02329	0.043043	0.254894
OSBPL1A	118.709	-0.801504	0.396263	-2.02266	0.0431085	0.254894
TRIM59	49.5656	-0.822549	0.406718	-2.02241	0.0431343	0.254894
HDAC2	614.137	-0.581057	0.287314	-2.02238	0.0431376	0.254894
CDK11B	164.584	-0.801146	0.396184	-2.02216	0.0431602	0.254894
ZNF154	7.05824	-2.12146	1.04925	-2.02188	0.0431883	NA
TRAPPC1	423.038	0.812315	0.401802	2.02168	0.0432096	0.255002
CDRT15P2	3.09397	-4.36652	2.16011	-2.02143	0.0432356	NA
MAS1L	3.09397	-4.36652	2.16011	-2.02143	0.0432356	NA
GYS1	65.0499	0.925339	0.457826	2.02116	0.0432635	0.255136
NUTF2	263.111	0.81977	0.405716	2.02055	0.0433262	0.255323
C17orf58	86.3906	-0.814373	0.403234	-2.01961	0.0434243	0.255547
ROMO1	149.171	0.595656	0.294969	2.01938	0.0434473	0.255547
PIH1D2	15.2252	-1.48092	0.733399	-2.01925	0.0434608	NA
INF2	71.12	0.891226	0.441366	2.01924	0.0434618	0.255547
ZNF430	84.1266	-0.74716	0.370067	-2.01899	0.0434887	0.255547
LOC401321	49.2079	-0.952271	0.471761	-2.01855	0.0435344	0.255632
MAP3K13	13.7627	-1.48642	0.736433	-2.01841	0.0435487	NA
LOC146880	110.035	-0.796529	0.39492	-2.01694	0.043702	0.256361
XAF1	31.7305	-1.68506	0.835528	-2.01676	0.043721	0.256361
OR1J2	3.03816	-4.33335	2.14889	-2.01656	0.0437418	NA
SPZ1	3.03816	-4.33335	2.14889	-2.01656	0.0437418	NA
RABGGTA	47.8603	0.936834	0.464686	2.01606	0.0437938	0.256526
BLID	125.408	-0.809188	0.401424	-2.0158	0.0438214	0.256526
NBPF10	263.45	-0.673526	0.334158	-2.01559	0.0438429	0.256526
STXBP2	254.24	0.724	0.359344	2.01478	0.0439277	0.256795
AKT2	191.386	0.595474	0.295586	2.01455	0.0439513	0.256795
ANKHD1	235.104	-0.614002	0.304838	-2.01419	0.0439895	0.256835
SSH1	298.519	0.555167	0.275708	2.01361	0.0440509	0.257011
ALDH6A1	4.44988	2.44351	1.21382	2.01307	0.0441072	NA
PTAR1	85.7599	-0.902879	0.448515	-2.01304	0.0441103	0.257174
OBSL1	4.00096	-3.62641	1.80181	-2.01265	0.0441515	NA
SMPD4	93.6488	0.692821	0.344303	2.01224	0.0441948	0.257484
FOXM1	44.2375	1.07109	0.532569	2.01118	0.0443062	0.25795
MEF2D	76.6663	0.894309	0.444795	2.01061	0.0443667	0.257953
KIAA0753	32.6641	-1.09579	0.545119	-2.01019	0.0444115	0.257953
GYLTL1B	115.057	0.658645	0.32766	2.01015	0.0444157	0.257953
TRIP11	101.791	-0.71121	0.353838	-2.00999	0.0444323	0.257953
PLAT	29.0027	0.970487	0.482894	2.00973	0.0444596	NA
KPNA6	923.113	0.813421	0.404783	2.00952	0.0444816	0.258056
JAG1	132.106	0.643968	0.320566	2.00885	0.0445534	0.25829
GALNT5	90.1132	1.11432	0.55482	2.00843	0.0445981	0.258314
ASH1L-AS1	30.9435	-1.1587	0.577054	-2.00796	0.0446474	0.258314
SUPT6H	151.718	0.759414	0.378244	2.00774	0.0446713	0.258314
LOC100506888	8.71459	-2.42723	1.20896	-2.0077	0.044675	NA
DMTF1	189.873	-0.774341	0.385984	-2.00615	0.0448404	0.258314
MAP1S	36.2268	0.919153	0.458222	2.00591	0.0448656	0.258314
RPAP3	66.8915	-0.807134	0.402409	-2.00576	0.0448823	0.258314
GPR180	69.9409	-0.799734	0.398724	-2.00573	0.0448846	0.258314
VARS	363.645	0.503737	0.251159	2.00565	0.0448932	0.258314
HIST1H3A	56.7135	0.837426	0.417535	2.00564	0.0448946	0.258314
PCM1	143.556	-0.798977	0.398367	-2.00563	0.0448958	0.258314
ACYP2	37.2126	-0.903894	0.450695	-2.00556	0.0449036	0.258314
PAFAH1B3	54.4936	0.782589	0.390325	2.00497	0.0449668	0.258433
OCIAD2	193.381	0.696931	0.347655	2.00466	0.0449989	0.258433
TTYH2	50.1079	0.882024	0.440058	2.00434	0.0450341	0.258433
CLK4	31.4949	-1.04231	0.520116	-2.00399	0.0450711	0.258433
CIAPIN1	93.767	0.694013	0.3464	2.0035	0.0451233	0.258433
FNBP1	225.642	-0.61523	0.307094	-2.00339	0.0451353	0.258433
RPS6KB2	94.103	0.657091	0.328004	2.0033	0.0451452	0.258433
UAP1	305.19	-0.531115	0.265158	-2.00301	0.0451762	0.258433
C14orf28	21.2753	-1.22869	0.613454	-2.0029	0.0451877	NA
PTOV1	234.932	0.547252	0.273311	2.00231	0.0452519	0.258686
LOC644961	41.3651	-1.28743	0.64315	-2.00176	0.0453108	0.258842
CXorf57	21.0772	-1.42689	0.712968	-2.00134	0.0453558	NA
DCPS	99.1157	0.694576	0.347118	2.00098	0.0453946	0.25914
AMFR	344.076	0.7719	0.385876	2.00039	0.0454587	0.259326
IL29	9.89574	2.27555	1.13769	2.00015	0.0454836	NA
ANKRD36B	53.4405	-1.07362	0.537148	-1.99874	0.0456368	0.260142
ATP5A1	775.656	0.765911	0.383247	1.99848	0.045665	0.260142
NGFR	3.04224	2.83837	1.4206	1.998	0.0457166	NA
OR4E2	3.02307	-4.3327	2.16898	-1.99758	0.0457627	NA
NEU1	100.747	0.646484	0.323638	1.99755	0.0457652	0.260446
PNKD	60.1128	0.816663	0.408863	1.9974	0.0457818	0.260446
EML6	14.264	-1.46581	0.733999	-1.99701	0.0458238	NA
SH3BP1	82.5937	0.695989	0.348579	1.99665	0.0458635	0.26073
BTC	75.4924	-0.778006	0.389741	-1.99621	0.0459109	0.260818
MPHOSPH8	122.63	-0.711228	0.356357	-1.99583	0.0459522	0.260872
DPYSL3	26.3306	1.18888	0.595896	1.99512	0.0460301	NA
SON	367.032	-0.564146	0.282796	-1.99489	0.0460554	0.261278
DIS3	262.338	-0.577607	0.289722	-1.99366	0.0461891	0.26173
LEFTY1	4.11762	-3.00043	1.50511	-1.9935	0.0462067	NA
MSX1	32.7928	1.01215	0.507734	1.99347	0.0462098	0.26173
TRA2B	113.468	0.698871	0.350614	1.99328	0.0462307	0.26173
ARF5	442.064	0.578999	0.290518	1.99299	0.0462629	0.261731
AZI2	85.9039	-0.801808	0.40261	-1.99153	0.0464231	0.262435
CTDSP1	252.617	0.568158	0.285324	1.99127	0.0464512	0.262435
MFAP2	116.797	0.603133	0.303163	1.98947	0.0466497	0.263299
ZBTB41	104.695	-0.69381	0.348822	-1.98901	0.0467002	0.263299
MRPL24	247.363	0.722237	0.363114	1.98901	0.0467004	0.263299
ANK1	1.4072	4.57812	2.30185	1.98888	0.0467143	NA
BEST2	1.4072	4.57812	2.30185	1.98888	0.0467143	NA
CEP104	129.242	-0.66254	0.333212	-1.98835	0.0467735	0.263519
HRC	5.20078	-3.0295	1.52395	-1.98792	0.0468203	NA
LEPROTL1	36.3078	1.30906	0.658543	1.98782	0.0468318	0.263519
MRPL12	148.832	0.59698	0.300324	1.98778	0.0468357	0.263519
DCP2	171.116	-0.608611	0.306305	-1.98694	0.0469287	0.263861
ANO5	35.8831	-0.953359	0.47989	-1.98662	0.0469646	0.263883
FRMD8	49.2471	0.833151	0.419654	1.98533	0.0471082	0.264476
GPRC5A	892.129	0.528261	0.266115	1.98509	0.0471346	0.264476
DZIP3	109.774	-0.635432	0.320375	-1.9834	0.0473229	0.265351
COL17A1	12.4279	1.52029	0.76704	1.98202	0.0474775	NA
SNORA33	121.646	-0.636423	0.32112	-1.98189	0.0474921	0.266118
ERAP1	185.267	1.05363	0.532025	1.98042	0.0476567	0.266798
SEC11C	388.923	-0.546481	0.276015	-1.9799	0.0477151	0.266798
FAM190A	34.239	-1.05663	0.533737	-1.97968	0.04774	0.266798
MGAT2	156.433	-0.810367	0.409349	-1.97964	0.0477434	0.266798
MAU2	51.6254	0.809084	0.408824	1.97905	0.0478103	0.26699
C3orf36	2.91145	-4.26326	2.15503	-1.97828	0.0478967	NA
MRC2	62.7534	0.892073	0.450938	1.97826	0.0478992	0.267059
STXBP6	3.2278	-3.26416	1.65008	-1.97819	0.0479074	NA
HNRNPUL1	214.341	0.928499	0.469473	1.97775	0.0479573	0.267059
ZNF383	39.4252	-0.91221	0.461414	-1.97699	0.0480432	0.267059
CEP120	65.9686	-1.1149	0.564004	-1.97676	0.0480682	0.267059
UBE2J1	325.02	-0.56467	0.285697	-1.97646	0.0481023	0.267059
ANKRD24	57.0016	-1.10798	0.560593	-1.97645	0.0481039	0.267059
OCEL1	8.97295	2.51736	1.27371	1.9764	0.0481099	NA
ERCC2	98.0039	0.709186	0.358856	1.97624	0.0481277	0.267059
AADAT	65.631	-0.795625	0.402623	-1.9761	0.048143	0.267059
USP7	504.384	-0.517675	0.261994	-1.97591	0.0481652	0.267059
SFXN2	56.5095	0.775053	0.392343	1.97545	0.0482176	0.267059
RRAS2	152.452	-0.749775	0.37958	-1.97528	0.0482368	0.267059
TCAIM	40.2389	-1.02731	0.520095	-1.97524	0.0482415	0.267059
ACVR1B	232.586	0.934468	0.473101	1.9752	0.0482457	0.267059
C14orf162	3.52104	-3.59728	1.82162	-1.97478	0.0482934	NA
SLC27A3	5.75836	2.03358	1.02991	1.97452	0.0483231	NA
RNF148	23.0752	-1.65631	0.838977	-1.9742	0.0483591	NA
CUL5	63.3289	-0.983003	0.498084	-1.97357	0.048431	0.267713
SLC25A44	35.022	0.961791	0.487369	1.97344	0.0484459	0.267713
LRRC14	36.3956	0.908843	0.46057	1.9733	0.0484616	0.267713
CYC1	263.752	0.540174	0.273886	1.97226	0.0485799	0.267965
PUS7L	65.256	-1.02478	0.519636	-1.97211	0.0485976	0.267965
GLRX2	60.9101	-0.78283	0.397007	-1.97183	0.0486293	0.267965
YIPF3	342.429	0.741182	0.3759	1.97175	0.0486378	0.267965
OR2A1	5.76168	-2.33927	1.18722	-1.97038	0.0487951	NA
ATP2B4	264.682	0.69729	0.353901	1.9703	0.0488042	0.268702
FAM111B	28.7049	-1.17209	0.595108	-1.96954	0.048891	NA
HMBS	66.5748	0.772011	0.391978	1.96953	0.0488925	0.269007
C2orf49	185.859	-0.660023	0.335186	-1.96913	0.0489385	0.26908
OR4C13	3.00798	-4.33156	2.19987	-1.96901	0.0489521	NA
AP1S1	126.275	0.66442	0.337534	1.96845	0.0490159	0.269155
UBE2B	156.531	0.65359	0.332035	1.96844	0.0490177	0.269155
PTRF	301.737	0.628268	0.319254	1.96793	0.0490762	0.269296
ZNF566	6.7909	-2.014	1.02369	-1.96738	0.049139	NA
GEN1	40.5209	-0.946822	0.481464	-1.96655	0.0492354	0.269989
HMGB3P1	3.17885	-3.41302	1.73567	-1.9664	0.0492527	NA
EEF2	3125.49	0.696617	0.354314	1.9661	0.0492873	0.270093
INVS	95.9284	-0.878168	0.44678	-1.96555	0.0493505	0.270259
IRAK1	6.67532	1.86598	0.949352	1.96553	0.0493534	NA
KIAA1211	39.9575	0.908495	0.462318	1.96509	0.0494043	0.270304
GGA2	73.4777	0.682686	0.347439	1.96491	0.0494245	0.270304
OR56A5	4.26786	-3.69853	1.88247	-1.96473	0.049446	NA
H2AFZ	1307.77	0.581375	0.295996	1.96413	0.0495147	0.270616
CSK	128.898	0.610394	0.310828	1.96376	0.0495575	0.27067
OR5B21	2.50275	-4.06823	2.07218	-1.96326	0.0496156	NA
OR1A2	4.93656	-3.74215	1.90618	-1.96316	0.0496271	NA
GNRHR2	7.10597	-2.19264	1.11703	-1.96292	0.0496556	NA
PEX16	11.5882	1.49093	0.759779	1.96232	0.0497258	NA
TSPAN9	40.7223	0.993494	0.506443	1.96171	0.0497961	0.271793
SLC12A8	24.9807	1.08305	0.552113	1.96164	0.0498045	NA
ODF4	2.44693	-4.02434	2.05198	-1.9612	0.049856	NA
PYCR1	475.245	0.817424	0.416836	1.96102	0.0498767	0.271829
STARD4	263.846	-0.563277	0.287259	-1.96087	0.0498939	0.271829
WDR55	159.014	0.596657	0.304292	1.9608	0.049902	0.271829

## Sheet: D- Ht29_DEseq result
Gene	baseMean	log2FoldChange	lfcSE	stat	pvalue	padj
SNORA75	1869.97	-8.86438	1.15717	-7.66041	1.85e-14	1.26e-10
ERBB2	2216.79	-7.75731	1.0155	-7.63889	2.19e-14	1.26e-10
SNORA9	3191.93	-8.23188	1.11395	-7.38979	1.47e-13	5.24e-10
SNORA28	4674.94	-9.28138	1.2608	-7.36147	1.82e-13	5.24e-10
SNORA68	3349.24	-6.44848	0.905163	-7.12411	1.05e-12	2.42e-09
SNORD94	202.159	-6.50833	0.928593	-7.00881	2.4e-12	4.62e-09
SNORA71D	2395.1	-5.72792	0.834478	-6.86407	6.69e-12	1.1e-08
SNORA19	241.073	-7.83917	1.16439	-6.73245	1.67e-11	2.41e-08
SNORA50	2237.88	-7.50695	1.13047	-6.64058	3.12e-11	3.83e-08
SCARNA18	1898.6	-8.01878	1.21169	-6.61786	3.64e-11	3.83e-08
SNORA16A	2355.04	-6.34782	0.95923	-6.61762	3.65e-11	3.83e-08
SNORA14B	167.663	-4.85988	0.749091	-6.48771	8.72e-11	8.38e-08
SNORA24	4326.98	-6.43764	1.01057	-6.37031	1.89e-10	1.67e-07
SNORA71B	1305.81	-4.97717	0.78711	-6.32334	2.56e-10	2.11e-07
SNORA43	3320.3	-6.72808	1.07791	-6.24179	4.33e-10	3.33e-07
SNORA63	22937.7	-6.801	1.09502	-6.21086	5.27e-10	3.8e-07
SNORA74A	2221.07	-7.45934	1.20655	-6.18237	6.31e-10	4.28e-07
SNORA71A	1528.79	-5.62035	0.914085	-6.14861	7.82e-10	5.01e-07
SCARNA16	1980.85	-6.91853	1.13501	-6.09557	1.09e-09	6.62e-07
SNORA10	767.734	-4.97196	0.817996	-6.07822	1.22e-09	7.01e-07
CYR61	64.5756	-3.45583	0.570645	-6.056	1.4e-09	7.66e-07
SNORA46	622.241	-6.24866	1.04412	-5.98463	2.17e-09	1.12e-06
RNU12	901.008	-6.46483	1.081	-5.98041	2.23e-09	1.12e-06
FOS	118.618	-3.34866	0.561833	-5.96024	2.52e-09	1.21e-06
SNORA31	2426.79	-6.14437	1.06381	-5.77583	7.66e-09	3.53e-06
SNORA14A	96.3842	-5.83093	1.01735	-5.73149	9.96e-09	4.42e-06
HIST1H2BF	116.19	-3.01334	0.528152	-5.70544	1.16e-08	4.8e-06
SNORD15A	1002.37	-6.52762	1.14421	-5.7049	1.16e-08	4.8e-06
SNORD17	2673.76	-6.02249	1.07495	-5.60258	2.11e-08	8.4e-06
SNORA62	419.027	-6.27145	1.12361	-5.58153	2.38e-08	9.17e-06
SNORD15B	1390.27	-4.75433	0.855957	-5.55441	2.79e-08	1.04e-05
SNORA8	17816.3	-5.5147	0.995046	-5.54216	2.99e-08	1.08e-05
SNORA42	196.153	-5.61899	1.02418	-5.48634	4.1e-08	1.43e-05
SNORA38	1020.73	-5.59808	1.02339	-5.47012	4.5e-08	1.53e-05
SNORA53	9067.62	-6.35792	1.16437	-5.46039	4.75e-08	1.54e-05
AP3S1	290.928	-4.88039	0.894104	-5.45842	4.8e-08	1.54e-05
SNORA21	4018.75	-5.79254	1.0673	-5.42727	5.72e-08	1.78e-05
ID1	201.181	-4.41363	0.816953	-5.40255	6.57e-08	1.99e-05
SNORA5A	2553.29	-5.13121	0.955645	-5.36937	7.9e-08	2.34e-05
SNORA79	116.89	-8.73292	1.63468	-5.34228	9.18e-08	2.64e-05
SNORA81	957.142	-5.74582	1.07629	-5.33854	9.37e-08	2.64e-05
SNORA52	459.18	-4.57472	0.861938	-5.30748	1.11e-07	3.05e-05
SNORA12	1139.04	-4.31876	0.818355	-5.27736	1.31e-07	3.52e-05
SNORA57	118.904	-6.56948	1.24723	-5.26728	1.38e-07	3.63e-05
SNORA1	331.128	-5.86342	1.1157	-5.25539	1.48e-07	3.79e-05
SHC4	96.4976	5.63761	1.07649	5.23703	1.63e-07	4.09e-05
RHOB	147.437	-3.5507	0.678645	-5.23204	1.68e-07	4.11e-05
SCARNA5	988.678	-5.19857	1.00131	-5.19175	2.08e-07	5.01e-05
MT2A	1367.35	-4.23371	0.817873	-5.17649	2.26e-07	5.32e-05
SNORA33	340.267	-5.19729	1.00835	-5.15423	2.55e-07	5.87e-05
SNORA27	3188.08	-5.4924	1.07095	-5.12856	2.92e-07	6.6e-05
SNORA23	7952.24	-5.88544	1.15217	-5.10814	3.25e-07	7.14e-05
SNORA48	170.359	-6.12513	1.19944	-5.10664	3.28e-07	7.14e-05
SNORA6	312.461	-5.28413	1.05127	-5.02642	5e-07	0.000106736
SNORA5C	272.023	-4.29318	0.864821	-4.96425	6.9e-07	0.000144634
SNORA41	174.612	-4.96871	1.01485	-4.89598	9.78e-07	0.000201465
SCARNA13	259.654	-3.30087	0.680761	-4.8488	1.24e-06	0.000251345
SNORA34	684.508	-4.5707	0.94721	-4.82543	1.4e-06	0.00027781
RPL22L1	248.592	-3.83272	0.80066	-4.78695	1.69e-06	0.000331037
HIST1H2AJ	332.168	-2.94668	0.620013	-4.75261	2.01e-06	0.000383007
B2M	3431.89	-3.49396	0.736345	-4.74501	2.08e-06	0.000383007
RPS18	663.098	-2.94489	0.620517	-4.74587	2.08e-06	0.000383007
HIST1H2BJ	27.3217	-5.92671	1.24922	-4.74433	2.09e-06	0.000383007
IFITM3	797.619	-3.27169	0.694807	-4.70878	2.49e-06	0.000444776
PPP1R15A	78.1095	-2.52354	0.53614	-4.70687	2.52e-06	0.000444776
PHLDA2	126.939	-2.90164	0.616782	-4.70448	2.55e-06	0.000444776
CHMP2A	124.048	-2.59118	0.559566	-4.6307	3.64e-06	0.000627366
SNORA64	5546.55	-4.0438	0.878638	-4.60236	4.18e-06	0.000708557
HIST1H3F	78.1256	-4.14766	0.903453	-4.59089	4.41e-06	0.000737768
EGR1	183.41	-2.66036	0.580911	-4.57964	4.66e-06	0.000767485
ETFB	71.5781	-3.13842	0.685816	-4.57619	4.74e-06	0.000769236
IFITM1	745.04	-3.38792	0.741319	-4.57012	4.87e-06	0.000773246
KCNN4	25.2023	-8.41446	1.84153	-4.56928	4.89e-06	0.000773246
SCARNA6	56.6645	-4.47686	0.982704	-4.55565	5.22e-06	0.000813985
HN1	131.142	-3.85441	0.853504	-4.51599	6.3e-06	0.000969211
EZR	488.739	-3.28984	0.73218	-4.49321	7.02e-06	0.00106471
RMRP	37028.5	-5.89671	1.31917	-4.47002	7.82e-06	0.0011657
VASP	32.1555	-5.25081	1.17512	-4.46833	7.88e-06	0.0011657
SNORA49	1139.95	-3.73546	0.837222	-4.46174	8.13e-06	0.00118695
FAM3C	143	-2.0799	0.466529	-4.45825	8.26e-06	0.00119135
COPS4	45.4909	-3.45781	0.780093	-4.43256	9.31e-06	0.0013104
SNORA70	4463.42	-3.528	0.795944	-4.43247	9.32e-06	0.0013104
SCARNA9	524.558	-3.2583	0.739979	-4.40323	1.07e-05	0.00148203
SNORA65	1191.53	-4.75102	1.08128	-4.3939	1.11e-05	0.00152876
SNORA69	19.6753	-7.27313	1.66566	-4.36652	1.26e-05	0.00171301
CCDC85B	84.8343	-2.83532	0.652858	-4.34293	1.41e-05	0.00188558
RPPH1	31423.6	-4.95696	1.14564	-4.32679	1.51e-05	0.00200582
IFIT1	1019.37	-4.32389	1.0025	-4.3131	1.61e-05	0.00210995
MILR1	16.7882	-7.84116	1.81921	-4.31019	1.63e-05	0.00211386
SCARNA12	452.597	-3.00677	0.702151	-4.28223	1.85e-05	0.00237127
PLAU	50.7107	-6.76408	1.58364	-4.27122	1.94e-05	0.00246407
FGFBP1	26.1102	-7.18272	1.68478	-4.2633	2.01e-05	0.00252529
NAV3	22.1818	-8.22215	1.93741	-4.24389	2.2e-05	0.00272031
HLA-DRB1	10.4074	-7.12521	1.67975	-4.24183	2.22e-05	0.00272031
SNORA66	688.556	-4.37182	1.0335	-4.23012	2.34e-05	0.00283569
SNORA2B	44.304	-4.51474	1.06903	-4.22322	2.41e-05	0.00289356
TERC	135.999	-2.92173	0.69238	-4.21983	2.44e-05	0.00290707
TMSB4X	515.966	-3.7964	0.900863	-4.21419	2.51e-05	0.00295033
TRIM27	61.8714	-2.69465	0.641006	-4.20378	2.62e-05	0.00305815
OR52D1	16.0567	-7.75228	1.84684	-4.19759	2.7e-05	0.0031046
FSCN1	37.274	-5.92242	1.4115	-4.19584	2.72e-05	0.0031046
C10orf116	181.548	-10.5009	2.50571	-4.1908	2.78e-05	0.00314321
SCARNA7	1571.77	-2.61429	0.626989	-4.1696	3.05e-05	0.00341691
SNORA55	116.094	-2.85612	0.685505	-4.16645	3.09e-05	0.00343121
JUND	70.667	-2.54719	0.612337	-4.15978	3.19e-05	0.00348717
CSNK1G1	23.791	-8.32839	2.00279	-4.1584	3.2e-05	0.00348717
SCARNA15	46.508	-5.02666	1.21115	-4.15032	3.32e-05	0.00357888
SP140L	223.405	-2.16499	0.522129	-4.14647	3.38e-05	0.00360595
KCNQ1OT1	41.1692	-3.34628	0.808742	-4.13763	3.51e-05	0.00371321
HIST2H2AC	254.082	-3.10742	0.751978	-4.13233	3.59e-05	0.00376545
LRRC37BP1	63.255	-3.46871	0.840826	-4.12536	3.7e-05	0.00384632
MATR3	499.687	1.89252	0.459261	4.12079	3.78e-05	0.00388834
KITLG	106.668	-3.72148	0.904955	-4.11233	3.92e-05	0.0039979
EDEM3	169.19	1.94842	0.478014	4.07607	4.58e-05	0.0046342
KHNYN	73.8236	-2.20473	0.541232	-4.07354	4.63e-05	0.0046441
PSMB2	815.496	1.85731	0.456597	4.06772	4.75e-05	0.00472061
PLSCR4	69.3955	3.07924	0.760386	4.04957	5.13e-05	0.00505834
KLF10	95.4754	-2.13845	0.529588	-4.03795	5.39e-05	0.00527043
IL8	142.441	-3.33541	0.828433	-4.02617	5.67e-05	0.00549492
SCARNA2	15.5475	-5.666	1.4139	-4.00736	6.14e-05	0.00586101
LOC100271836	250.309	-1.67785	0.418726	-4.00703	6.15e-05	0.00586101
ONECUT3	24.0476	-8.33871	2.08254	-4.0041	6.23e-05	0.00588559
BCL10	44.8171	-2.50772	0.626592	-4.00216	6.28e-05	0.00588579
KIAA1429	94.7375	2.33128	0.583977	3.99208	6.55e-05	0.00609214
HIST1H4E	290.064	-1.77677	0.446742	-3.97718	6.97e-05	0.00643483
RPL38	1141.5	-2.52297	0.640407	-3.93963	8.16e-05	0.00747042
PPAPDC1B	76.2261	2.3574	0.599275	3.93375	8.36e-05	0.00759533
SCARNA10	572.574	-3.86254	0.986301	-3.91619	9e-05	0.00810613
GTF3C4	183.137	2.43753	0.624261	3.90467	9.44e-05	0.00843645
ITGA5	11.1767	-7.21823	1.85157	-3.89844	9.68e-05	0.00858965
SNORA67	302.593	-3.70761	0.953773	-3.8873	0.000101364	0.00892468
IFI6	3865.05	-3.19889	0.826829	-3.86886	0.000109344	0.00955435
MLLT6	150.779	-2.00318	0.520231	-3.85056	0.000117846	0.0102198
SNORA71C	1423.89	-3.15323	0.827277	-3.81158	0.000138081	0.0118852
RPL13AP20	232.237	-2.51712	0.661981	-3.80241	0.000143293	0.0122426
GAL	13.6653	-7.51956	1.98365	-3.79076	0.000150184	0.012737
DKK1	91.2286	-4.46974	1.1804	-3.78663	0.000152705	0.0128562
CMBL	83.0695	2.2388	0.592492	3.77861	0.000157704	0.0131808
GNL1	100.262	2.20935	0.585873	3.77103	0.000162575	0.0134903
IFIT2	782.291	-4.00646	1.06603	-3.75829	0.000171076	0.0140942
MRPL38	59.9741	-2.7651	0.736469	-3.75454	0.000173662	0.0142058
SNORA77	29.433	-4.89223	1.30447	-3.75037	0.000176575	0.0143424
UBE2B	148.252	-2.29355	0.612491	-3.74462	0.000180667	0.014475
ATP8B3	10.6043	-6.34248	1.69443	-3.74313	0.000181739	0.014475
LMNA	290.872	-2.27037	0.606795	-3.74158	0.000182868	0.014475
TRAPPC9	159.193	-2.27592	0.608359	-3.74108	0.000183228	0.014475
VAPB	182.925	2.34206	0.627187	3.73423	0.00018829	0.0147737
LOC100190986	126.64	-2.24649	0.602711	-3.72731	0.000193537	0.0150058
HMGA1	110.829	-2.82403	0.757742	-3.7269	0.00019385	0.0150058
SUSD2	14.4242	-7.59466	2.04278	-3.7178	0.000200965	0.0154529
BTG2	25.0525	-2.85314	0.768997	-3.71021	0.000207086	0.0158181
TMSB10	2555.98	-2.74714	0.742317	-3.70076	0.000214951	0.0163108
SNORA2A	200.484	-3.9903	1.08012	-3.69431	0.000220481	0.0166211
LOC440173	25.6517	-2.90592	0.787529	-3.68993	0.00022432	0.0168007
SLC35D2	35.6731	-3.46669	0.943193	-3.67549	0.000237394	0.0176652
OR51B6	12.2782	-7.35424	2.0077	-3.66301	0.000249271	0.0184301
ZNF330	80.046	2.48076	0.678646	3.65545	0.000256734	0.0188609
HIST1H4J	194.309	-2.01425	0.551827	-3.65015	0.000262085	0.0191322
RPS25	1451.18	-2.22694	0.610432	-3.64815	0.00026414	0.019161
IREB2	337.355	1.94696	0.534058	3.6456	0.000266767	0.0191876
CKS1B	136.844	-1.65766	0.454829	-3.64457	0.000267835	0.0191876
PLA1A	38.0552	2.6454	0.728762	3.62999	0.000283434	0.0201798
CCDC134	79.4609	-3.31142	0.913078	-3.62665	0.000287118	0.0203167
ANXA1	746.715	-2.16909	0.599141	-3.62033	0.000294228	0.0206928
NDUFS5	84.6155	-2.73478	0.756328	-3.61586	0.00029935	0.0209255
HIST1H3D	96.2973	-2.15386	0.596487	-3.61092	0.000305119	0.0212002
OR51I1	15.8493	-6.04966	1.67641	-3.6087	0.000307734	0.0212393
STRADB	122.076	2.91295	0.80751	3.60733	0.000309363	0.0212393
DHRS9	26.3282	-3.9596	1.10484	-3.58388	0.00033853	0.0229961
MIR100HG	15.4985	-7.69372	2.14845	-3.58105	0.000342216	0.0229961
IFITM2	324.666	-3.31575	0.925972	-3.58083	0.000342511	0.0229961
IMMP2L	21.2557	-3.06629	0.856384	-3.58051	0.000342927	0.0229961
DMKN	9.71406	-6.99917	1.96022	-3.57061	0.000356155	0.0236478
SRSF2	32.2139	-3.09396	0.866613	-3.57017	0.000356746	0.0236478
CKB	129.043	-2.57817	0.722932	-3.56627	0.000362099	0.0238654
VCAN	7.43554	-6.62915	1.86073	-3.56265	0.000367125	0.0240592
HIST3H2BB	161.265	-2.10933	0.592367	-3.56084	0.000369665	0.0240888
ISG15	2778.58	-4.38315	1.23547	-3.54774	0.000388546	0.0251769
CRIP1	53.7506	-3.28302	0.926967	-3.54168	0.000397591	0.0256191
SORT1	217.291	2.15693	0.611444	3.52761	0.000419335	0.0268701
CEP72	57.9215	-2.84514	0.809146	-3.51623	0.000437727	0.0278936
PRSS3	58.1232	-3.43884	0.978592	-3.51407	0.0004413	0.0279668
CLU	88.1033	-4.34488	1.238	-3.5096	0.000448782	0.0281825
EGFL7	28.8649	-4.16869	1.18796	-3.50912	0.000449591	0.0281825
HIST1H2BC	319.875	-1.67769	0.478981	-3.50263	0.000460684	0.0287218
CBWD1	31.752	-2.93035	0.836969	-3.50114	0.000463272	0.0287279
RFWD3	149.706	2.02381	0.578382	3.49908	0.00046686	0.0287955
SNORA84	445.941	-3.60454	1.03324	-3.48858	0.00048559	0.0296232
HIST1H2BL	15.9116	-4.28164	1.2276	-3.48781	0.000486985	0.0296232
WBP1L	69.5022	-2.13688	0.612989	-3.486	0.0004903	0.0296232
KRT8	620.955	-3.69548	1.06013	-3.48586	0.000490552	0.0296232
PPDPF	413.285	-1.90691	0.548398	-3.47724	0.000506606	0.0304333
HIST1H4K	180.916	-1.9297	0.556983	-3.46456	0.000531103	0.0317396
KIAA1551	77.703	-2.01677	0.582728	-3.46092	0.00053834	0.0320062
OR51M1	12.5926	-6.60802	1.91999	-3.44169	0.000578085	0.034193
MSLN	22.6925	-4.08722	1.1898	-3.43521	0.000592089	0.0348426
SEMA6B	20.7544	-5.11754	1.49377	-3.42593	0.000612704	0.0357979
KLK5	6.9866	-6.5266	1.9058	-3.4246	0.00061571	0.0357979
CHST15	7.57561	-6.64341	1.94039	-3.42375	0.000617634	0.0357979
PHF14	141.412	2.57405	0.753313	3.41697	0.000633226	0.0365181
SLC5A6	135.4	2.49999	0.733696	3.40739	0.000655884	0.0375934
TRAPPC6B	28.6414	-2.42272	0.711236	-3.40635	0.000658389	0.0375934
RPE	240.742	1.85158	0.544094	3.40305	0.000666382	0.0378623
HIST1H2AD	97.287	-1.77229	0.521409	-3.39903	0.000676242	0.0382342
BFAR	151.298	2.37358	0.700187	3.38992	0.000699128	0.0393353
TNFRSF6B	16.3934	-4.54938	1.34584	-3.38032	0.000724018	0.040538
CKAP4	37.0443	-2.19755	0.650597	-3.37774	0.000730836	0.040722
HRASLS2	12.1376	-4.53344	1.34374	-3.37374	0.000741535	0.0410118
RXRA	48.882	-1.93796	0.574687	-3.3722	0.000745716	0.0410118
IL28B	9.87162	-6.26871	1.85914	-3.37183	0.000746703	0.0410118
RPS15A	510.19	-2.38761	0.708499	-3.36996	0.000751796	0.04103
CDKN1A	125.83	-3.2471	0.963789	-3.3691	0.00075415	0.04103
NOSIP	31.7052	-2.30414	0.684996	-3.36372	0.00076899	0.041476
EEF1A2	164.803	-2.45015	0.728447	-3.36352	0.000769539	0.041476
KATNBL1	33.8892	-2.81394	0.838502	-3.35591	0.000791051	0.0424371
TCEB3	219.962	2.18055	0.653297	3.33777	0.000844546	0.0450972
NUP153	131.13	1.87852	0.563875	3.33145	0.000863944	0.0457962
RPL13	580.614	-3.46132	1.03915	-3.33093	0.000865577	0.0457962
GJC1	7.62697	-6.66615	2.00462	-3.32539	0.000882942	0.0465016
PLSCR1	427.297	-1.3961	0.420007	-3.32398	0.000887412	0.0465246
C8orf73	28.8938	-3.1304	0.942143	-3.32264	0.000891707	0.0465382
SPRY2	95.009	1.98547	0.599214	3.31345	0.000921526	0.0478778
LGALS3BP	726.567	-2.18944	0.661318	-3.31072	0.000930568	0.0479366
CAPN1	82.908	-2.41432	0.729269	-3.3106	0.000930969	0.0479366
UNC5A	18.7865	-4.74276	1.4333	-3.30897	0.00093641	0.0480024
ANO6	94.6593	1.7797	0.539671	3.29774	0.000974649	0.0497416
ADNP	88.9639	-2.3689	0.718733	-3.29594	0.000980921	0.0498411
TRAPPC1	181.76	1.63107	0.495182	3.29389	0.000988123	0.0498674
CDK5RAP3	123.894	-1.96863	0.597763	-3.29333	0.000990084	0.0498674
CAV1	15.1146	-6.45625	1.96341	-3.28828	0.00100803	0.0505506
TMEM70	68.2837	-2.42514	0.738918	-3.28202	0.00103066	0.0514615
SELL	4.81053	-6.02011	1.83635	-3.27831	0.0010443	0.051756
RPL13A	638.04	-2.27177	0.693039	-3.27798	0.00104553	0.051756
RHOBTB3	39.8365	-2.75995	0.842592	-3.27554	0.00105459	0.0519815
PSMD11	384.734	1.52937	0.468046	3.26755	0.00108482	0.0532437
MSX2	23.0032	-3.69052	1.12989	-3.26627	0.00108973	0.0532581
DUSP1	171.365	-2.22099	0.680487	-3.26383	0.00109917	0.0534931
INF2	78.4969	-2.05815	0.632145	-3.25581	0.00113068	0.0547952
SPAST	43.3365	-2.55497	0.785728	-3.25172	0.00114709	0.0553578
BRK1	207.406	1.5493	0.477559	3.2442	0.00117781	0.0565621
TOR1A	135.148	2.16654	0.668019	3.24322	0.00118185	0.0565621
SPAG9	279.571	1.7753	0.547813	3.24071	0.00119233	0.0568276
NDUFAB1	305.356	1.79769	0.555546	3.2359	0.0012126	0.0575562
CASP2	234.293	1.78277	0.551916	3.23015	0.00123726	0.0584715
MYL9	15.4055	-4.90585	1.51929	-3.22905	0.00124203	0.0584715
OR51B5	77.278	-10.0208	3.10939	-3.22275	0.00126964	0.0595287
PALD1	21.4218	-3.03093	0.940886	-3.22136	0.00127585	0.0595774
CD40	7.27881	-6.59121	2.04966	-3.21576	0.00130101	0.0602953
MTIF2	85.4937	1.82653	0.568195	3.21462	0.00130616	0.0602953
RPL39	988.202	-2.3519	0.732017	-3.21291	0.00131399	0.0602953
FAM222A-AS1	8.34293	-6.80491	2.11859	-3.212	0.00131813	0.0602953
FOSL2	64.5867	-2.3732	0.738995	-3.2114	0.00132092	0.0602953
SCARNA14	27.6039	-5.0507	1.57292	-3.21103	0.00132259	0.0602953
RFC5	16.4511	-3.71847	1.16038	-3.20453	0.00135282	0.061431
CSRNP1	16.0617	-3.39035	1.05982	-3.19898	0.00137915	0.0623811
LIF	28.1876	-3.01748	0.943848	-3.197	0.00138863	0.0625643
FZD2	5.06741	-6.0559	1.89922	-3.18863	0.0014295	0.064155
GPATCH4	74.5602	1.84012	0.578197	3.18252	0.00146	0.0652701
ADM	54.3913	-2.69868	0.848527	-3.18042	0.0014706	0.0654899
ARL6IP1	131.052	-1.83615	0.578467	-3.17417	0.00150266	0.0666604
SLC31A1	137.55	2.41241	0.7605	3.17214	0.0015132	0.0668705
CPNE7	14.1199	-3.358	1.05941	-3.16969	0.001526	0.0671788
MALAT1	1901.71	-3.19023	1.00912	-3.1614	0.00157014	0.0688591
SNORA47	15.6202	-3.58577	1.1352	-3.15872	0.00158464	0.0692321
CXCL2	30.9257	-3.98244	1.2619	-3.15591	0.00159998	0.0696382
RASGRP2	5.67607	-6.20165	1.9689	-3.1498	0.00163382	0.0708438
COX5B	159.183	-1.73279	0.550523	-3.14753	0.00164656	0.0711288
ANXA2	1352.7	-1.70852	0.543472	-3.14371	0.0016682	0.0717947
LPAR1	16.1605	-5.49783	1.75176	-3.13846	0.00169841	0.0726706
TRIM26	33.9295	-1.96675	0.626755	-3.13798	0.00170115	0.0726706
EREG	251.179	-3.41996	1.09141	-3.13353	0.00172717	0.0734047
PPP6C	150.65	1.65654	0.528763	3.13287	0.00173106	0.0734047
SRXN1	89.4071	-2.02734	0.649603	-3.12089	0.00180308	0.0760184
RPS19	1751.48	-1.98226	0.635377	-3.11981	0.00180966	0.0760184
RPL18	1196.22	-1.68419	0.539917	-3.11936	0.00181247	0.0760184
HARS	103.529	1.9612	0.630856	3.10879	0.00187856	0.0784443
RFX7	88.2017	1.78443	0.574296	3.10716	0.00188891	0.0784443
DERL2	18.5288	-2.88717	0.929466	-3.10627	0.00189466	0.0784443
H3F3B	1646.42	-1.926	0.620125	-3.10582	0.00189752	0.0784443
FAM125A	9.26212	-5.76056	1.85964	-3.09768	0.00195041	0.0797516
NOTCH3	6.58901	-6.44762	2.08214	-3.09664	0.0019573	0.0797516
TRIM25	225.954	-1.40758	0.454686	-3.09573	0.00196331	0.0797516
PARP14	373.907	-2.64989	0.856083	-3.09537	0.0019657	0.0797516
C11orf75	27.2743	-3.59817	1.16269	-3.0947	0.00197012	0.0797516
TANC2	20.5062	-3.29506	1.06477	-3.09462	0.00197063	0.0797516
BET1L	75.9901	1.76716	0.571791	3.09057	0.00199775	0.0799745
RPLP2	2327.07	-2.32969	0.753836	-3.09045	0.00199856	0.0799745
GDF15	158.737	-2.69618	0.872428	-3.09044	0.00199862	0.0799745
SCARNA9L	99.1429	-1.99023	0.644158	-3.08966	0.00200387	0.0799745
DDIT4	223.937	-1.3297	0.430809	-3.08653	0.00202506	0.0805414
LOC401127	20.8875	-5.24589	1.70138	-3.08332	0.00204705	0.0808415
SULT2B1	31.1943	-3.01617	0.978381	-3.08281	0.00205055	0.0808415
ARHGEF35	10.5579	-7.14348	2.31753	-3.08237	0.00205363	0.0808415
DVL1	136.685	-1.79223	0.582705	-3.0757	0.00210008	0.0823887
MTRNR2L8	5.81865	-5.43058	1.76716	-3.07305	0.00211884	0.0828431
CYP24A1	22.0396	-4.17315	1.35981	-3.06892	0.00214832	0.0837118
RPL35A	21.9591	-3.51559	1.14942	-3.05856	0.002224	0.0863691
RAN	334.019	-2.57979	0.843874	-3.05709	0.002235	0.0865048
DDX47	40.1107	-2.17921	0.714566	-3.04969	0.00229074	0.0883659
RPLP1	1634.94	-2.69141	0.883171	-3.04744	0.002308	0.0887349
MPC1	153.569	2.06356	0.677391	3.04633	0.00231652	0.0887666
SZRD1	204.146	-1.55492	0.510691	-3.04473	0.00232886	0.0889441
WBP11	311.108	1.91627	0.629776	3.04278	0.00234405	0.0889569
PSME2	89.8577	-2.13645	0.702156	-3.0427	0.00234462	0.0889569
PHLDA1	486.659	-1.87374	0.616177	-3.04092	0.00235857	0.0891926
TBCA	101.22	-2.50977	0.826477	-3.03671	0.00239174	0.0901515
PPP6R3	102.715	-1.71842	0.566228	-3.03486	0.00240649	0.0904119
RPL36	1112.44	-1.81644	0.599613	-3.02935	0.0024508	0.0914014
SEMA3F	12.0692	-3.41757	1.12831	-3.02893	0.00245424	0.0914014
RTBDN	6.38551	-6.37552	2.10588	-3.02749	0.00246598	0.0914014
KRTAP2-3	14.9833	-5.16072	1.70505	-3.02672	0.0024722	0.0914014
PRPF40B	31.8956	-2.79032	0.922055	-3.02619	0.00247656	0.0914014
OXLD1	31.3901	-3.14592	1.03984	-3.02539	0.00248311	0.0914014
ARHGAP8	62.8226	-2.41329	0.797845	-3.02476	0.0024883	0.0914014
HOMER1	37.6816	-1.89132	0.626238	-3.02012	0.00252674	0.0925188
TRIP12	62.1672	-1.60097	0.530664	-3.01692	0.00255355	0.0932045
SSFA2	225.947	-1.70066	0.564446	-3.01297	0.00258703	0.0941288
TMEM184C	80.1518	1.67871	0.557678	3.01018	0.00261091	0.0944574
SH3BGRL3	552.061	-1.30466	0.433441	-3.01	0.00261244	0.0944574
PRPH	6.58152	-6.41841	2.13324	-3.00876	0.00262319	0.0945497
SPPL3	109.398	1.83123	0.610045	3.00179	0.00268395	0.0964383
ATG3	314.45	1.78327	0.594583	2.99919	0.00270697	0.096836
METTL9	148.624	1.62455	0.541761	2.99865	0.00271181	0.096836
TMEM106C	255.885	1.70606	0.569515	2.99564	0.00273868	0.0974935
NDRG1	91.6435	-2.08028	0.69483	-2.99394	0.00275396	0.0977361
ANKRD36	36.9138	-2.50152	0.836357	-2.99097	0.00278092	0.0981292
KDELR3	66.8621	1.67816	0.561251	2.99003	0.00278949	0.0981292
KLF2	6.55425	-5.6258	1.88159	-2.98991	0.00279057	0.0981292
MX1	235.626	-3.3208	1.11153	-2.98759	0.00281183	0.0983926
MTHFD2	338.773	-1.45146	0.486143	-2.98568	0.00282953	0.0983926
RAB14	118.499	-1.52576	0.511028	-2.98566	0.00282969	0.0983926
DDX50	49.6129	1.81055	0.60682	2.98366	0.00284819	0.0983926
PAK2	211.256	1.43337	0.480425	2.98355	0.00284928	0.0983926
TWSG1	126.108	1.57528	0.528093	2.98296	0.00285476	0.0983926
UBA3	180.444	1.47291	0.493828	2.98264	0.00285777	0.0983926
TMEM126A	41.0993	2.64156	0.88623	2.98067	0.00287619	0.0987297
RAB12	216.72	1.66214	0.557979	2.97887	0.00289317	0.0987297
AKAP13	22.6855	-2.48511	0.834249	-2.97886	0.00289324	0.0987297
HIRA	123.171	1.73092	0.582296	2.97258	0.00295305	0.100473
FAM59B	11.7817	-6.06924	2.04453	-2.96853	0.00299228	0.101509
FTL	2908.48	-2.50318	0.843989	-2.96589	0.00301805	0.102083
URI1	324.778	-1.70522	0.575874	-2.96109	0.0030655	0.103384
SERINC5	294.883	1.90219	0.64357	2.95569	0.00311973	0.104906
PSPH	62.6986	1.64078	0.555295	2.95479	0.00312886	0.104908
HIST1H3I	79.7949	-1.66484	0.565372	-2.94468	0.00323285	0.10808
ABCB10	30.5584	2.14643	0.729592	2.94196	0.0032614	0.10833
IRS2	79.6667	1.87696	0.638086	2.94154	0.0032658	0.10833
LAPTM4A	264.424	-1.74593	0.593592	-2.94129	0.00326848	0.10833
CEBPB	36.0131	-3.10585	1.05945	-2.93158	0.00337247	0.111456
RPL36A	594.365	-1.47395	0.50418	-2.92346	0.0034616	0.113855
FBXO2	6.80163	-5.69621	1.94909	-2.92249	0.00347241	0.113855
SNX30	62.1648	1.97636	0.676306	2.92229	0.00347468	0.113855
HLA-A	864.411	-2.56221	0.877263	-2.92069	0.00349263	0.114119
PLAGL1	9.85113	-5.81973	1.99544	-2.91652	0.00353958	0.115082
RASGEF1A	8.88058	-6.88958	2.36296	-2.91565	0.00354944	0.115082
S100A10	41.8908	-3.16813	1.08668	-2.91543	0.00355202	0.115082
SUPT6H	97.2431	-1.59229	0.5473	-2.90935	0.00362178	0.11695
CCDC78	8.12029	-5.44801	1.87304	-2.90865	0.00362998	0.11695
ZYX	184.187	-1.47567	0.508037	-2.90465	0.00367668	0.118125
ZNF609	103.882	1.69351	0.584554	2.8971	0.00376629	0.120668
SDF4	222.438	-2.04352	0.706334	-2.89313	0.00381426	0.121866
SLC39A7	154.331	-2.05205	0.70954	-2.89209	0.00382688	0.121932
GADD45B	33.1654	-2.14167	0.74112	-2.88977	0.00385522	0.122496
MT1E	649.996	-3.73293	1.29321	-2.88655	0.00389486	0.123416
NINL	12.8823	-5.14623	1.78455	-2.88376	0.00392953	0.123947
GPAT2	8.68457	-6.859	2.37873	-2.88348	0.00393312	0.123947
ALOX12P2	7.67787	-5.3674	1.86577	-2.87678	0.00401761	0.126265
CBFA2T3	7.3876	-5.32877	1.85443	-2.87354	0.00405903	0.126914
BTN3A1	29.4301	-2.63911	0.918723	-2.87259	0.00407123	0.126914
SNORA80B	4.96011	-5.99324	2.08703	-2.87167	0.00408312	0.126914
ZNF641	23.0053	-3.55501	1.2382	-2.87111	0.00409037	0.126914
TMEM150A	28.6238	2.24033	0.780536	2.87024	0.00410155	0.126914
RBP7	5.57625	-6.19716	2.15927	-2.87003	0.00410428	0.126914
STYXL1	38.5374	-1.72699	0.602007	-2.86872	0.00412137	0.127101
CKS2	110.55	-2.06073	0.71875	-2.8671	0.00414253	0.127413
NOL3	12.1748	-3.26939	1.14188	-2.86317	0.00419431	0.128663
ACP6	47.8785	-2.08809	0.729807	-2.86116	0.00422097	0.129137
FAM213A	59.4419	2.0355	0.711877	2.85934	0.00424525	0.129536
ROGDI	13.0858	-3.12938	1.09635	-2.85437	0.00431222	0.131232
PCSK9	14.8679	-3.83267	1.34385	-2.85201	0.00434438	0.131863
UQCR11	115.16	-2.10832	0.740198	-2.84832	0.00439513	0.132827
CEBPD	25.2901	-2.80038	0.983456	-2.84749	0.0044066	0.132827
CYP4F11	40.4705	-3.3735	1.18485	-2.84719	0.00441068	0.132827
HIST1H2BO	12.5456	-3.31339	1.16499	-2.84413	0.00445323	0.133759
CABIN1	39.3611	-2.13327	0.750363	-2.84299	0.00446926	0.133892
ESPN	12.0358	-4.24476	1.49537	-2.83859	0.00453126	0.135398
SLC25A4	101.89	2.00844	0.707944	2.83701	0.00455384	0.135721
ERO1L	80.6377	-1.70819	0.602496	-2.83519	0.00457991	0.136146
STAU1	97.7565	2.14926	0.759236	2.83082	0.00464284	0.13739
ZWILCH	138.402	1.75207	0.61908	2.83012	0.0046531	0.13739
NRIP1	278.033	-2.38094	0.841587	-2.8291	0.00466788	0.13739
ST6GAL1	68.7481	2.92182	1.03296	2.8286	0.00467522	0.13739
GRHPR	76.4783	-2.88263	1.01925	-2.82818	0.0046813	0.13739
GPSM3	20.7772	-4.64291	1.64315	-2.82561	0.00471902	0.137867
ADCY3	43.3332	1.92593	0.681719	2.82511	0.00472637	0.137867
ATF3	47.7615	-2.58372	0.91471	-2.82464	0.00473344	0.137867
TNFRSF21	224.321	-1.69861	0.602386	-2.8198	0.00480531	0.139608
ATIC	526.452	1.57108	0.557335	2.81891	0.00481871	0.139646
PLIN3	25.3693	-3.02898	1.07539	-2.81664	0.00485285	0.140246
PIK3R3	73.2348	2.17819	0.773582	2.81573	0.00486673	0.140246
MCCC2	116.946	1.35493	0.481304	2.81512	0.00487591	0.140246
HIST2H2BE	800.66	-2.02415	0.720031	-2.81119	0.00493579	0.141615
CCDC6	130.2	-1.6406	0.584254	-2.80803	0.00498456	0.14266
F3	23.7915	-3.22531	1.14949	-2.80585	0.00501838	0.143272
RBM33	93.6571	-1.47748	0.527624	-2.80026	0.0051062	0.145419
DDX18	101.576	1.75529	0.627206	2.79859	0.00513269	0.145724
OVCA2	25.0928	-3.03246	1.08381	-2.79796	0.0051427	0.145724
CAMK1D	26.0666	-4.09296	1.46326	-2.79716	0.00515545	0.145724
OGFOD2	9.04486	-4.97467	1.77895	-2.79641	0.00516744	0.145724
CASP3	46.5564	2.05076	0.734007	2.79392	0.00520734	0.146491
GPR137B	68.4613	2.15264	0.771082	2.79172	0.00524292	0.146941
SLC16A14	5.63637	-4.47173	1.602	-2.79135	0.00524882	0.146941
TMEM141	94.7565	-2.35457	0.844246	-2.78896	0.00528769	0.147671
OR51Q1	4.24608	-5.77856	2.07398	-2.78622	0.00533269	0.148347
AQR	154.655	1.94849	0.699408	2.78592	0.00533762	0.148347
MAPK8IP3	27.9986	-2.05987	0.739782	-2.78443	0.00536212	0.14867
MAK16	83.1941	1.53059	0.549897	2.78342	0.00537896	0.148779
EMP2	94.0945	2.0112	0.723847	2.77848	0.00546136	0.150697
PGAM5	58.493	-1.77139	0.640847	-2.76414	0.00570727	0.156053
HNRNPC	135.215	-1.99936	0.723327	-2.76411	0.00570785	0.156053
GDPD1	15.388	-3.03177	1.09695	-2.76381	0.00571314	0.156053
EIF4G1	679.89	1.20379	0.435624	2.76338	0.00572067	0.156053
CAP1	406.498	1.49246	0.540134	2.76312	0.00572515	0.156053
TNFRSF18	5.64532	-6.1976	2.2435	-2.76247	0.00573664	0.156053
KLHL11	28.3079	-1.94382	0.70392	-2.76142	0.00575499	0.156184
IER3IP1	248.5	1.92351	0.697404	2.7581	0.00581393	0.157413
AGPAT4	6.86862	-5.22257	1.89511	-2.75581	0.00585473	0.157956
LIMA1	123.89	-1.56401	0.567943	-2.75382	0.00589048	0.157956
RAD23B	181.497	-1.27354	0.462633	-2.75281	0.00590869	0.157956
HBB	27.8759	-3.85425	1.40018	-2.75268	0.00591103	0.157956
GNB1	115.409	1.76007	0.639435	2.75254	0.00591352	0.157956
SLC25A13	114.555	-1.81714	0.660203	-2.75239	0.00591616	0.157956
STXBP1	160.802	2.17366	0.790995	2.748	0.00599592	0.159358
HARS2	85.2169	1.60556	0.58427	2.74798	0.00599631	0.159358
RNF219	32.9611	-2.35471	0.857509	-2.74599	0.00603281	0.15996
LPHN1	16.9587	-3.43801	1.25259	-2.74471	0.00605642	0.160217
RNF213	230.841	-1.98829	0.724713	-2.74355	0.00607789	0.160417
FAM20B	70.7038	2.22802	0.812686	2.74155	0.00611492	0.160706
MTPAP	34.331	-1.90448	0.694696	-2.74146	0.00611668	0.160706
LOC100133315	15.1969	-2.85639	1.04368	-2.73685	0.00620296	0.162548
PARVA	76.0511	1.70841	0.624472	2.73577	0.00622351	0.162548
CPNE2	27.2572	2.09464	0.765733	2.73547	0.0062291	0.162548
FEM1A	18.1958	-2.80403	1.02581	-2.73348	0.00626688	0.163165
KLK7	8.8111	-5.14892	1.88464	-2.73204	0.00629437	0.163512
FLOT1	207.26	1.22073	0.447071	2.73052	0.00632351	0.163564
ZNF658	11.5152	-4.93247	1.80693	-2.72975	0.00633818	0.163564
RRP7B	38.1245	-2.03644	0.746027	-2.72971	0.00633891	0.163564
EBAG9	53.7687	-2.01703	0.739493	-2.72759	0.00637988	0.163923
ANXA7	131.803	-1.34256	0.492226	-2.72752	0.00638125	0.163923
LRIF1	82.0545	2.59589	0.952148	2.72635	0.00640383	0.164101
TMEM59L	7.4935	-6.62805	2.43169	-2.72569	0.00641665	0.164101
IRF9	101.925	-2.25586	0.827978	-2.72455	0.006439	0.164309
C4orf48	26.2416	-2.93751	1.08	-2.71991	0.00652989	0.16626
SMEK1	38.8781	-1.70099	0.625554	-2.71917	0.00654455	0.166266
IQGAP2	37.0099	2.34521	0.863174	2.71697	0.00658831	0.16701
EXOC5	41.771	-2.22849	0.820638	-2.71556	0.00661634	0.167186
VPS8	84.4146	1.56734	0.577254	2.71517	0.00662425	0.167186
CSPP1	6.73766	-4.79406	1.76617	-2.71439	0.00663987	0.167215
PMAIP1	104.313	-2.32529	0.858661	-2.70804	0.00676828	0.169928
NEAT1	579.233	-1.58973	0.587156	-2.7075	0.00677914	0.169928
FANCF	43.8684	2.05434	0.758931	2.70688	0.00679181	0.169928
TSG101	115.475	1.36769	0.505565	2.70528	0.00682478	0.170383
UBE2J2	86.4541	-1.53866	0.569009	-2.7041	0.00684886	0.170615
WDR37	5.00384	-5.2414	1.93883	-2.70338	0.00686375	0.170617
ARL8B	395.343	1.58792	0.588276	2.69928	0.00694895	0.172046
LINC00326	7.10147	-6.55371	2.42804	-2.69918	0.00695104	0.172046
CRNKL1	28.8294	-2.12184	0.786689	-2.69717	0.00699306	0.17253
SKP2	54.3093	2.50158	0.927898	2.69596	0.00701856	0.17253
RNF4	250.244	1.37051	0.508519	2.69511	0.00703658	0.17253
RPL12	947.812	-1.75723	0.652085	-2.69479	0.00704328	0.17253
RNF111	59.7446	1.6074	0.596506	2.69469	0.00704541	0.17253
SNORA74B	103.268	-3.04302	1.12976	-2.69351	0.00707039	0.172775
C20orf24	5.98836	-5.0374	1.87237	-2.69039	0.00713691	0.174032
SNAPIN	50.2654	-1.61571	0.600726	-2.6896	0.00715379	0.174076
PAWR	35.577	-2.9293	1.09011	-2.68715	0.00720642	0.174987
HIST1H4D	137.661	-1.3653	0.509174	-2.6814	0.00733139	0.177397
SF3B3	489.756	1.47343	0.549547	2.68117	0.00733642	0.177397
TTC23	19.2996	-2.79048	1.04141	-2.67952	0.00737289	0.177906
SIGLEC16	6.94195	-5.31871	1.98749	-2.67609	0.00744865	0.179358
TK2	33.0478	-2.34875	0.87829	-2.67423	0.00749017	0.179884
C2orf29	52.8017	-1.56404	0.584967	-2.67371	0.00750165	0.179884
VPS4A	283.174	1.65628	0.620047	2.67122	0.0075577	0.180486
WDR36	89.7566	1.3119	0.491129	2.6712	0.00755807	0.180486
LTV1	82.0297	2.02735	0.759558	2.66912	0.00760496	0.181231
TG	9.03435	-6.11999	2.29557	-2.666	0.00767598	0.182546
HIST1H2BI	21.5069	-2.70647	1.01663	-2.66221	0.00776306	0.184237
MICB	10.978	-3.98851	1.50048	-2.65815	0.00785709	0.185677
MAGT1	175.198	1.44572	0.543929	2.65792	0.00786246	0.185677
KDM5A	94.7675	1.60818	0.605146	2.65751	0.00787203	0.185677
FAM173A	22.2974	-2.56815	0.967494	-2.65443	0.00794424	0.186998
ZNF124	86.1216	-2.17279	0.818768	-2.65374	0.0079606	0.187001
NUP43	108.731	1.81517	0.684467	2.65195	0.00800283	0.187611
DDX55	238.765	1.66846	0.629791	2.64923	0.00806762	0.188746
C18orf21	30.3988	-1.70867	0.645337	-2.64772	0.00810374	0.189208
FNTA	112.901	-2.12295	0.802076	-2.64682	0.0081252	0.189325
SFT2D2	147.919	1.67267	0.632749	2.6435	0.00820536	0.190526
MT1X	112.677	-2.98241	1.12835	-2.64316	0.0082136	0.190526
FAM122B	85.127	-1.49953	0.567438	-2.64264	0.00822628	0.190526
TNFRSF10A	55.4767	-3.27142	1.23876	-2.64087	0.0082693	0.191018
SNHG4	196.43	-1.97766	0.749191	-2.63973	0.00829719	0.191018
RPL29P2	17.3858	-3.28845	1.24633	-2.63852	0.00832696	0.191018
PANK2	67.2486	2.29185	0.868814	2.63791	0.00834194	0.191018
ENPP4	23.9303	-2.76414	1.0479	-2.6378	0.00834453	0.191018
PHLPP2	178.006	2.04137	0.773917	2.63771	0.00834689	0.191018
IVD	65.2001	1.90879	0.724037	2.63632	0.00838108	0.19121
GCLC	98.2897	-1.52364	0.578147	-2.63538	0.00840421	0.19121
IFT43	40.5733	-1.97284	0.748606	-2.63535	0.00840503	0.19121
LINC00674	98.3656	-1.65213	0.627072	-2.63467	0.00842186	0.191216
SSR3	406.556	1.50846	0.573228	2.63152	0.0085005	0.192622
TRAF5	9.7437	-3.72666	1.41743	-2.62917	0.00855944	0.193304
SGSM3	24.547	-2.07098	0.787784	-2.62887	0.00856693	0.193304
PRPF4	42.4728	1.92115	0.730944	2.62832	0.00858084	0.193304
HIST1H3A	47.3862	-1.77685	0.676384	-2.62699	0.0086144	0.193681
CLPTM1L	86.395	-1.37647	0.52464	-2.62366	0.00869912	0.194816
PPP1R35	13.0108	-2.67789	1.02086	-2.62316	0.00871191	0.194816
STIM1	28.3708	1.95096	0.743787	2.62301	0.00871556	0.194816
SERP1	145.747	-1.33862	0.51069	-2.62121	0.00876192	0.195094
FOSB	14.0085	-3.1802	1.21346	-2.62077	0.00877308	0.195094
ARCN1	585.88	1.25698	0.479743	2.6201	0.00879031	0.195094
UBE3A	201.112	-2.04941	0.782247	-2.6199	0.00879563	0.195094
KCTD3	145.397	1.72648	0.659724	2.61697	0.00887143	0.195876
REXO1	109.484	1.97616	0.755233	2.61663	0.00888037	0.195876
STX5	35.1405	-1.64311	0.627964	-2.61657	0.00888184	0.195876
DNAJA2	308.564	1.48281	0.566879	2.61574	0.00890342	0.195977
RPS26	212.503	-1.75293	0.670499	-2.61436	0.00893951	0.196397
ARL14EPL	8.0436	-5.13063	1.96332	-2.61324	0.0089688	0.196626
NDUFB1	200.406	-1.61812	0.619337	-2.61266	0.00898404	0.196626
MSI2	78.9683	1.49142	0.571232	2.61088	0.00903087	0.196988
UNC5B	13.2784	-2.45834	0.941625	-2.61074	0.00903473	0.196988
NCK1	53.7807	-1.5414	0.590676	-2.60955	0.00906625	0.197302
BRI3BP	43.9574	1.9041	0.730075	2.60809	0.00910484	0.197769
ERLIN1	20.2092	-3.42516	1.31434	-2.60599	0.009161	0.198615
MAGEA2	17.0699	-4.43736	1.70671	-2.59994	0.00932392	0.201751
KCTD20	67.7114	1.37764	0.529998	2.59933	0.00934066	0.201751
GIPR	8.95212	-2.96082	1.14033	-2.59645	0.00941939	0.202282
PARP1	372.423	2.23	0.858871	2.59644	0.00941967	0.202282
TNFRSF10C	4.80381	-4.67982	1.80252	-2.59627	0.00942415	0.202282
IMPAD1	228.202	1.20135	0.462881	2.59537	0.00944888	0.202282
C11orf73	98.3758	1.62526	0.62625	2.59522	0.00945292	0.202282
GPX1	85.9527	-1.47167	0.567404	-2.5937	0.00949502	0.202782
RPUSD1	35.9655	-2.99644	1.15554	-2.5931	0.00951144	0.202782
ACOT2	22.1017	-3.50828	1.35343	-2.59214	0.00953805	0.202974
DCBLD2	245.543	-1.86345	0.720138	-2.58763	0.00966383	0.205272
BTF3L4	55.0172	-1.61535	0.624417	-2.58698	0.00968222	0.205284
IP6K1	75.1107	1.52562	0.590121	2.58527	0.00973028	0.205425
ORC6	90.2026	1.92275	0.743834	2.58492	0.00974015	0.205425
BBS10	10.2319	-3.69804	1.43066	-2.58484	0.00974228	0.205425
PLEKHA4	52.4323	-1.53213	0.593056	-2.58345	0.00978188	0.205884
SARS	163.886	-1.20893	0.468259	-2.58175	0.00982994	0.206518
RAB3B	5.63483	-4.96858	1.92645	-2.57914	0.0099048	0.207701
KPTN	27.1894	-2.33227	0.904498	-2.57853	0.00992227	0.207701
C6orf170	22.0935	-2.1119	0.820613	-2.57357	0.0100656	0.21032
POLR2E	145.57	-1.90619	0.74129	-2.57146	0.0101272	0.211225
SYT1	6.21566	-6.36231	2.47491	-2.57072	0.0101487	0.21129
H1F0	664.636	-2.88951	1.12459	-2.56938	0.0101881	0.211728
GNAI1	56.9228	-1.89763	0.739095	-2.5675	0.0102434	0.212495
CDK1	90.757	-1.71729	0.669821	-2.5638	0.0103533	0.21439
LY6E	449.878	-1.14692	0.447783	-2.56133	0.0104271	0.215249
SHMT1	32.0028	1.85056	0.722546	2.56117	0.0104321	0.215249
LOC100170939	41.424	-1.93131	0.754862	-2.5585	0.0105124	0.216519
LOC100507217	76.5797	-1.89158	0.740381	-2.55487	0.0106229	0.218403
NCKAP1	191.2	-1.49113	0.583976	-2.55341	0.0106675	0.218931
TRIOBP	110.256	-1.44468	0.566457	-2.55038	0.0107605	0.219555
ZNF444	11.4658	-4.2677	1.67381	-2.5497	0.0107817	0.219555
NCOA1	40.3639	1.88275	0.738433	2.54966	0.0107828	0.219555
SAFB	223.469	1.30072	0.510291	2.54897	0.0108041	0.219555
TRIT1	54.9379	-2.48875	0.976536	-2.54855	0.0108172	0.219555
SLMO2	252.389	-1.44445	0.566921	-2.54789	0.0108377	0.219555
KANK1	93.4329	1.63683	0.642589	2.54724	0.0108579	0.219555
NUP188	108.36	1.64812	0.647099	2.54694	0.0108673	0.219555
OGDHL	4.09491	-5.72681	2.24856	-2.54688	0.0108692	0.219555
AHNAK2	16.8759	-2.80321	1.10172	-2.5444	0.0109467	0.220594
FAM190B	56.1312	1.43665	0.564718	2.54401	0.0109589	0.220594
PHC2	13.6444	-3.82447	1.50443	-2.54214	0.0110175	0.220742
PTPRE	10.4006	-3.62954	1.42781	-2.54203	0.0110212	0.220742
KPNA4	161.998	1.17244	0.461353	2.54131	0.0110439	0.220742
SERPINE1	54.9814	-3.02433	1.19029	-2.54084	0.0110588	0.220742
MT1JP	13.5234	-2.50177	0.984692	-2.54066	0.0110643	0.220742
NRAS	157.601	1.57888	0.621575	2.54013	0.0110811	0.220742
S100A6	120.574	-2.55909	1.00876	-2.53686	0.0111851	0.222156
TAF10	99.7186	-1.37023	0.540164	-2.53669	0.0111906	0.222156
DTWD1	12.622	-2.33424	0.920696	-2.53529	0.0112353	0.2226
TMEM189	308.484	1.2948	0.510826	2.53472	0.0112536	0.2226
MSMO1	161.451	-1.29389	0.510574	-2.53419	0.0112709	0.2226
CLCC1	103.12	1.58669	0.627665	2.52793	0.0114736	0.225402
MAFK	13.2838	-2.56677	1.0154	-2.52783	0.0114771	0.225402
ATL3	93.7738	-1.44911	0.573373	-2.52734	0.0114932	0.225402
TTC26	27.5347	1.76787	0.699583	2.52703	0.0115032	0.225402
LINC00263	114.468	2.63629	1.04333	2.52681	0.0115104	0.225402
MKI67IP	165.093	1.60126	0.634094	2.52527	0.0115608	0.226005
SYTL3	9.57853	-3.51771	1.39408	-2.52333	0.011625	0.226874
NAT1	11.0414	-2.90632	1.15251	-2.52173	0.011678	0.227252
S100A4	121.066	-2.89329	1.14742	-2.52155	0.0116837	0.227252
DCK	56.2091	1.39801	0.554783	2.51992	0.0117383	0.227928
DOC2A	4.63049	-5.11449	2.0321	-2.51685	0.0118411	0.229035
LOC388796	136.898	1.36413	0.542105	2.51636	0.0118573	0.229035
SLC39A11	12.3154	-2.48637	0.988451	-2.51542	0.011889	0.229035
LOC150185	4.66789	-5.9246	2.35533	-2.5154	0.0118897	0.229035
RPL28	1419.98	-1.77341	0.705189	-2.5148	0.0119098	0.229035
ATRX	37.238	-2.02393	0.80485	-2.51467	0.0119144	0.229035
WASL	179.372	1.62341	0.645913	2.51336	0.0119586	0.229401
NANS	130.27	1.4361	0.571484	2.51293	0.0119733	0.229401
PPP1R14B	246.981	-1.37753	0.548977	-2.50927	0.0120981	0.231408
FAM169A	16.9029	-2.88029	1.14923	-2.50628	0.012201	0.232835
SFN	31.1325	-2.98111	1.18962	-2.50593	0.0122131	0.232835
COX7B	306.452	-1.34731	0.538018	-2.50422	0.0122723	0.233356
PERP	13.4722	-2.79528	1.11634	-2.50397	0.0122808	0.233356
SRSF3	230.142	-1.71456	0.685307	-2.50189	0.0123532	0.234345
IPO5	226.897	1.8694	0.747669	2.5003	0.0124088	0.235013
POP7	50.6525	-1.66903	0.667943	-2.49876	0.0124628	0.23555
BTBD3	86.0676	1.56499	0.626415	2.49833	0.012478	0.23555
MTFR1	97.7247	1.55925	0.624303	2.49759	0.0125041	0.235658
ADAM15	137.655	1.379	0.552769	2.49471	0.0126059	0.236855
ADAP2	4.26573	-5.78217	2.31821	-2.49424	0.0126227	0.236855
RWDD1	122.541	1.71135	0.686172	2.49406	0.0126293	0.236855
IDH3G	290.009	1.21623	0.488428	2.49009	0.012771	0.238606
MAPK15	6.14102	-4.39327	1.76451	-2.48979	0.0127818	0.238606
MRPL34	5.72587	-4.56495	1.83352	-2.48971	0.0127847	0.238606
IGSF3	87.2408	2.23587	0.898483	2.48849	0.0128287	0.23904
IFI27	609.251	-2.56587	1.03253	-2.48503	0.012954	0.240986
IARS2	228.78	1.64086	0.660507	2.48424	0.0129827	0.241131
C6orf57	13.6146	-2.93752	1.18278	-2.48357	0.0130071	0.241197
DNAJC11	116.437	1.44051	0.580783	2.4803	0.0131272	0.242758
TNFRSF12A	233.484	-1.95599	0.788744	-2.47989	0.0131425	0.242758
LARS	123.319	-1.59308	0.642621	-2.47904	0.0131736	0.242758
IGF1R	98.4526	1.75361	0.707387	2.47899	0.0131755	0.242758
FSTL3	8.66597	-3.66703	1.48078	-2.47643	0.0132705	0.24368
CRLF1	5.82363	-6.27479	2.53408	-2.47617	0.0132802	0.24368
TRIM8	161.209	-1.7296	0.698564	-2.47593	0.013289	0.24368
AKR1A1	80.2188	-1.67915	0.678434	-2.47504	0.0133221	0.2439
MND1	12.1885	-2.42698	0.981087	-2.47376	0.0133699	0.244128
ARHGAP4	4.95041	-4.75364	1.9219	-2.47341	0.0133831	0.244128
LDB1	57.5876	-1.70583	0.689781	-2.47301	0.0133981	0.244128
ST14	171.457	-2.73531	1.10674	-2.47151	0.0134545	0.244309
PCYT1A	64.938	1.56731	0.634197	2.47134	0.0134609	0.244309
HMGCR	174.558	1.12001	0.453252	2.47105	0.0134715	0.244309
HIST1H2BH	55.0645	-2.23365	0.90459	-2.46924	0.0135401	0.245168
RRP1B	118.639	1.37549	0.557264	2.46829	0.0135762	0.245366
FKBP8	46.9978	-1.72673	0.699944	-2.46696	0.0136267	0.245366
EPG5	62.3302	1.37569	0.55768	2.46681	0.0136324	0.245366
TCF25	137.959	-1.37341	0.557023	-2.46563	0.0136773	0.245366
ITGB1	249.724	-1.33593	0.541869	-2.46542	0.0136854	0.245366
ANKIB1	277.397	1.72782	0.700844	2.46535	0.013688	0.245366
PSME1	160.726	-1.61088	0.653763	-2.46401	0.0137392	0.245366
MDM2	109.242	-1.68834	0.685371	-2.4634	0.0137628	0.245366
DNAJC8	298.494	1.57442	0.639142	2.46333	0.0137655	0.245366
C12orf10	19.5875	-1.8305	0.743148	-2.46317	0.0137714	0.245366
TLE3	94.761	1.62683	0.660558	2.46282	0.0137851	0.245366
ZNF782	33.535	-1.92274	0.78101	-2.46187	0.0138215	0.245635
NDUFA4	163.928	1.20036	0.488034	2.45958	0.01391	0.246828
FLNC	13.2079	-4.40723	1.79631	-2.45348	0.014148	0.250666
NDUFS3	348.659	1.15842	0.472881	2.44971	0.0142971	0.252919
NIPA2	91.0252	1.67322	0.683552	2.44783	0.0143721	0.253856
RBP1	26.6761	-7.72857	3.15874	-2.44673	0.0144159	0.254075
EXOSC4	43.1383	-2.06369	0.843636	-2.44618	0.0144377	0.254075
DTWD2	56.1376	2.01793	0.825083	2.44573	0.0144558	0.254075
TTC38	81.3961	1.49918	0.613174	2.44495	0.0144873	0.254075
DACH1	5.391	4.27939	1.75043	2.44476	0.0144947	0.254075
SIPA1L3	57.9112	-1.80764	0.740079	-2.4425	0.0145859	0.255223
TAF1	30.3163	-1.64104	0.672225	-2.44121	0.0146381	0.255223
SFT2D1	188.448	1.34022	0.549404	2.4394	0.0147117	0.255223
NPSR1-AS1	8.96735	-6.89105	2.82512	-2.43921	0.0147193	0.255223
DKC1	70.1423	1.3553	0.555759	2.43864	0.0147426	0.255223
SFTA2	5.02044	-4.76294	1.95318	-2.43856	0.014746	0.255223
ST7	100.975	1.60039	0.656384	2.43819	0.0147609	0.255223
LRRC24	4.25964	-4.49745	1.84511	-2.43749	0.0147896	0.255223
SNORA36A	12.5471	-2.9021	1.19076	-2.43719	0.014802	0.255223
RPLP0	1521.18	-1.72077	0.706075	-2.43709	0.0148061	0.255223
C22orf28	85.9854	1.67866	0.688934	2.4366	0.0148262	0.255223
IL13RA1	37.9512	-1.73498	0.712314	-2.4357	0.014863	0.255223
SLC25A30	75.1417	1.52541	0.626286	2.43564	0.0148655	0.255223
TMUB2	24.5778	-2.10101	0.862964	-2.43464	0.0149066	0.255223
FKBP1A	567.245	1.68417	0.691798	2.43448	0.014913	0.255223
XRCC4	46.3385	-1.47646	0.606567	-2.43413	0.0149278	0.255223
MTFMT	67.2741	1.56581	0.643328	2.43392	0.0149363	0.255223
KBTBD4	35.5512	1.57208	0.646191	2.43285	0.0149806	0.255601
KIAA1715	39.0693	2.36668	0.973116	2.43206	0.0150132	0.255703
TLE1	13.629	-2.64583	1.08809	-2.43163	0.0150309	0.255703
IFT46	50.0296	1.57534	0.648221	2.43025	0.0150886	0.25581
TMEM171	4.33272	-4.9978	2.05703	-2.42962	0.0151147	0.25581
RPL26	1368.26	-1.31289	0.540425	-2.42937	0.015125	0.25581
DIEXF	105.139	1.23276	0.507443	2.42935	0.0151259	0.25581
DNAAF3	17.881	-2.80879	1.15822	-2.42509	0.0153046	0.258046
HNRNPF	98.0689	-1.28575	0.530283	-2.42465	0.0153233	0.258046
PBX1	16.9404	2.56889	1.05951	2.4246	0.0153252	0.258046
OGFOD1	107.28	1.53385	0.632962	2.42329	0.0153808	0.258603
FRS2	67.7193	1.61326	0.66599	2.42235	0.0154204	0.258631
GUK1	17.0915	-2.74434	1.13311	-2.42196	0.0154369	0.258631
OSBPL1A	63.043	1.86708	0.770993	2.42166	0.0154497	0.258631
LRFN4	13.3491	-2.45554	1.01661	-2.41543	0.0157165	0.262426
CYBA	117.73	-1.77198	0.733712	-2.41509	0.0157313	0.262426
LRP11	135.154	1.59325	0.659789	2.41478	0.0157447	0.262426
MYO10	227.896	1.90348	0.78866	2.41357	0.0157973	0.262883
SNX13	39.7806	-1.44919	0.600643	-2.41274	0.0158331	0.262883
PIK3C2A	26.9293	-1.96581	0.814968	-2.41213	0.0158595	0.262883
FYTTD1	55.6185	-1.80183	0.747012	-2.41205	0.0158632	0.262883
COG2	36.2795	1.87366	0.777086	2.41114	0.0159029	0.263162
DAB2	147.095	1.95277	0.810681	2.40881	0.0160048	0.264251
BTBD2	153.892	1.54786	0.642643	2.40858	0.0160145	0.264251
CCND1	239.149	-1.59523	0.66313	-2.40561	0.0161455	0.266032
RPL10A	418.041	-1.556	0.647136	-2.40443	0.0161976	0.266381
GTF2E2	34.0292	-1.59614	0.663929	-2.40409	0.0162129	0.266381
PABPN1	105.363	-1.30131	0.541588	-2.40276	0.016272	0.266972
AMACR	23.4056	2.51733	1.04924	2.39919	0.0164315	0.268915
SLC25A51	12.1385	-2.45176	1.02214	-2.39866	0.0164551	0.268915
MX2	134.946	-2.35769	0.983023	-2.3984	0.0164667	0.268915
TUBGCP3	125.781	1.67907	0.7005	2.39696	0.0165319	0.268915
GLRX2	37.5417	2.28785	0.95453	2.39683	0.0165375	0.268915
RAC3	77.9747	-2.2255	0.928761	-2.39621	0.0165658	0.268915
C2orf65	5.32985	-6.14353	2.56423	-2.39585	0.0165817	0.268915
JUNB	172.08	-2.09156	0.873106	-2.39554	0.0165961	0.268915
TP53BP2	77.8145	1.2202	0.509383	2.39544	0.0166003	0.268915
C6orf62	255.924	-1.1923	0.498336	-2.39257	0.0167309	0.270652
AP3D1	68.2478	1.96706	0.822576	2.39135	0.0167867	0.271173
MRP63	17.9768	-2.146	0.89817	-2.3893	0.0168806	0.271778
NDUFB4	361.639	1.41333	0.591593	2.38902	0.0168935	0.271778
MAGEB2	47.6484	-9.31374	3.89927	-2.38859	0.0169133	0.271778
ADSL	90.1114	1.69646	0.710269	2.38848	0.0169184	0.271778
USP6NL	78.0712	2.15543	0.903549	2.38552	0.0170551	0.273593
CRTAP	85.9247	2.31076	0.968892	2.38495	0.0170815	0.273637
UCK2	184.242	1.15915	0.486265	2.38379	0.0171352	0.274116
CHD8	17.7786	-2.42457	1.01765	-2.38252	0.0171948	0.274343
GGNBP2	52.7861	-1.59743	0.670495	-2.38247	0.017197	0.274343
SEZ6L2	111.245	1.64875	0.692549	2.38071	0.0172795	0.275279
TMEM40	7.75287	-4.56236	1.91883	-2.37768	0.0174218	0.277118
WBSCR27	15.9349	-3.43188	1.44364	-2.37723	0.017443	0.277118
MGC57346	38.4459	-1.73108	0.728818	-2.37518	0.0175402	0.278278
MGA	46.1231	1.73233	0.729906	2.37335	0.0176273	0.279219
PTRHD1	47.0626	1.41291	0.595552	2.37244	0.0176709	0.279219
TMEM170A	36.6833	1.69838	0.715884	2.37242	0.0176721	0.279219
RBMS1	60.6811	1.74318	0.735429	2.37028	0.0177744	0.280451
RIN1	21.8547	-2.12906	0.898698	-2.36905	0.017834	0.281007
CWC27	150.024	1.74298	0.737212	2.36429	0.0180647	0.28395
COX19	36.9876	-2.07185	0.876392	-2.36406	0.0180758	0.28395
QSER1	221.258	1.62569	0.687925	2.36318	0.0181187	0.28395
GTSF1	44.4972	-9.21502	3.89943	-2.36317	0.0181192	0.28395
SF3B14	113.5	-1.11264	0.471121	-2.36169	0.0181918	0.284701
C14orf1	332.66	1.31228	0.556094	2.35982	0.0182837	0.285423
CEP350	85.9938	1.72926	0.732815	2.35975	0.0182875	0.285423
CBWD5	25.1123	-1.99912	0.848316	-2.35658	0.0184441	0.287479
NLN	83.0514	1.63593	0.694895	2.35421	0.0185619	0.288826
EPS8L2	92.5912	-2.52249	1.07165	-2.35384	0.0185806	0.288826
ZNF627	11.4456	-2.67293	1.13606	-2.35281	0.0186321	0.289236
HCFC1	177.69	1.34836	0.57377	2.35	0.0187732	0.290366
MDH1	340.297	1.3258	0.564232	2.34974	0.0187867	0.290366
LOC440434	152.756	-1.20641	0.513509	-2.34933	0.018807	0.290366
UBE3B	39.6164	1.68149	0.715911	2.34874	0.0188371	0.290366
CCNDBP1	174.858	1.75009	0.745223	2.34841	0.0188536	0.290366
TRIM72	4.30752	-4.99637	2.1278	-2.34814	0.0188676	0.290366
VDAC2	241.292	1.00315	0.427302	2.34762	0.0188936	0.290366
PDIA4	90.9803	-1.61625	0.688535	-2.34737	0.0189062	0.290366
EID3	38.3377	-2.15592	0.919004	-2.34593	0.0189797	0.290966
COPB2	114.945	1.36834	0.58336	2.34561	0.0189958	0.290966
UQCC	59.0256	-1.3866	0.591453	-2.3444	0.0190578	0.291528
PGM2	26.8906	1.69575	0.723528	2.34373	0.0190921	0.291661
SRGAP2	10.9499	-2.86002	1.22054	-2.34324	0.019117	0.291661
PLSCR3	29.3492	-2.41296	1.03124	-2.33987	0.0192906	0.293245
CDCA4	2.91688	-5.25455	2.24598	-2.33953	0.0193078	0.293245
MYH15	3.96796	-5.66341	2.42076	-2.33952	0.0193088	0.293245
APOL6	78.8622	-2.22133	0.949744	-2.33887	0.0193421	0.293245
HIST1H1E	319.372	-1.59661	0.682676	-2.33876	0.0193479	0.293245
SSNA1	53.8271	-1.67221	0.715903	-2.33581	0.0195011	0.294943
CDCA7L	61.6149	1.74208	0.745876	2.33562	0.0195111	0.294943
ZNF32	21.6355	1.82463	0.781444	2.33495	0.019546	0.295033
C5orf15	203.153	1.2171	0.52141	2.33425	0.0195824	0.295033
SSBP3	76.6239	-1.32958	0.569648	-2.33404	0.0195938	0.295033
HIST1H4C	958.288	-1.5469	0.663058	-2.33299	0.0196489	0.295477
CAPN2	74.6032	-1.32072	0.566248	-2.3324	0.0196794	0.29555
PAFAH1B1	63.2104	1.44629	0.620345	2.33143	0.0197309	0.295937
MARCKSL1	35.9786	-1.81369	0.778652	-2.32926	0.0198451	0.29696
TRAF7	52.2923	1.38666	0.595347	2.32916	0.0198505	0.29696
SYNE4	5.24833	-3.40564	1.46359	-2.3269	0.0199705	0.298297
ST6GALNAC5	3.15774	-5.32233	2.28769	-2.3265	0.0199916	0.298297
GGT1	10.1523	-3.32382	1.42919	-2.32567	0.020036	0.298384
VWDE	4.93033	-6.00908	2.58408	-2.32543	0.0200492	0.298384
TIPARP	52.7932	-1.74915	0.752926	-2.32313	0.020172	0.299542
PSMC2	54.5823	1.49742	0.644607	2.323	0.020179	0.299542
COL6A2	14.6206	-4.18319	1.80147	-2.3221	0.0202275	0.299877
EDF1	226.289	-1.48758	0.640968	-2.32084	0.0202956	0.3005
HADHB	212.552	1.58749	0.684178	2.32029	0.0203253	0.300553
DOCK1	36.8262	-1.49282	0.643673	-2.31922	0.0203834	0.301026
NSF	97.8159	1.23205	0.531488	2.31811	0.0204436	0.30153
DBN1	60.2253	-1.57726	0.680917	-2.31638	0.0205374	0.302527
RAP1A	76.0713	-1.52173	0.657268	-2.31523	0.0206005	0.302649
JTB	143.883	-1.22524	0.529259	-2.31501	0.0206126	0.302649
RC3H2	105.698	1.29643	0.560062	2.31479	0.0206244	0.302649
TADA1	25.7337	1.88914	0.816332	2.31418	0.020658	0.302756
UAP1	163.755	1.19566	0.516926	2.31303	0.0207212	0.302799
OR51I2	2.98692	-5.2569	2.27282	-2.31294	0.0207257	0.302799
ADAMTS6	99.4771	2.43354	1.05246	2.31225	0.0207641	0.302799
MRPL46	144.174	1.06816	0.461965	2.31221	0.0207659	0.302799
IL28A	4.03843	-4.44617	1.92473	-2.31002	0.0208871	0.304182
PCMTD1	24.8214	-2.0192	0.874468	-2.30906	0.02094	0.304568
NUTF2	174.763	1.64836	0.714084	2.30836	0.0209793	0.304755
PRRX2	4.83607	-5.99916	2.60029	-2.30711	0.0210488	0.305049
LOC401397	95.7852	1.63092	0.707048	2.30665	0.0210741	0.305049
TRUB1	51.5116	-1.57457	0.682722	-2.30632	0.0210929	0.305049
HMG20A	191.696	1.37014	0.59414	2.30609	0.0211054	0.305049
SMA5	307.836	-1.32849	0.576328	-2.30509	0.0211614	0.305476
SIK2	68.4603	1.37107	0.595538	2.30224	0.0213219	0.307409
RPL29	1461.46	-1.38578	0.602258	-2.30097	0.0213935	0.307742
RUVBL1	153.053	1.10476	0.480149	2.30088	0.0213984	0.307742
AGAP3	97.9992	1.17967	0.513023	2.29945	0.0214795	0.308524
ZC3H12A	17.0362	-2.41836	1.05252	-2.29769	0.0215794	0.309495
KPNA6	246.604	1.18944	0.517757	2.2973	0.0216017	0.309495
POFUT2	60.8904	1.46446	0.637599	2.29684	0.0216278	0.309495
UFC1	29.0029	-1.45123	0.631964	-2.29637	0.0216545	0.309495
GABARAP	611.419	0.949395	0.413675	2.29503	0.0217316	0.310213
EXOSC3	83.6459	1.16364	0.507609	2.29239	0.021883	0.311988
HDLBP	705.579	1.37722	0.601425	2.28993	0.0220253	0.313539
SNORA30	28.6797	-2.19176	0.95728	-2.28957	0.0220462	0.313539
HPS6	42.5342	-1.67916	0.733561	-2.28905	0.0220763	0.313581
PPP2R5E	51.4827	-1.53262	0.670295	-2.28648	0.0222259	0.314634
INCENP	154.585	2.12537	0.930053	2.28521	0.0223005	0.314634
OGFR	99.5667	-1.35022	0.590882	-2.28509	0.0223073	0.314634
CSDAP1	3.13254	-5.31083	2.32417	-2.28504	0.0223103	0.314634
SUMO1P3	193.469	-1.14718	0.502101	-2.28476	0.022327	0.314634
FAM131B	10.9907	-3.44151	1.50642	-2.28457	0.0223383	0.314634
SYTL1	21.7036	-2.3128	1.01238	-2.28451	0.0223414	0.314634
MLXIPL	10.1868	-3.01973	1.32334	-2.28189	0.0224957	0.316421
SATB1	51.7289	1.50276	0.658984	2.28042	0.0225827	0.316925
FXN	47.6735	1.32343	0.580461	2.27997	0.0226095	0.316925
HLA-B	6.56629	-3.01796	1.32392	-2.27957	0.0226333	0.316925
PINK1	61.0206	1.75394	0.769463	2.27943	0.0226414	0.316925
COL4A5	4.78948	-4.70575	2.06522	-2.27857	0.0226925	0.317254
MTMR2	88.4973	1.23615	0.543128	2.27598	0.022847	0.318238
CSTA	3.1295	-4.51579	1.98445	-2.27559	0.0228704	0.318238
L2HGDH	26.3369	-2.32169	1.02041	-2.27525	0.0228911	0.318238
ZNF585A	19.9497	-2.15531	0.947356	-2.27508	0.0229013	0.318238
CASKIN1	7.35127	-3.90957	1.71859	-2.27487	0.0229136	0.318238
CCDC71L	26.4875	-2.41951	1.0638	-2.27441	0.0229413	0.318238
TOMM6	128.943	1.19013	0.523338	2.27411	0.0229591	0.318238
UBE2D2	195.703	-1.58907	0.698889	-2.27371	0.0229835	0.318238
PIP4K2B	109.306	1.36229	0.599558	2.27216	0.0230771	0.319151
TMX4	82.0642	1.45592	0.640956	2.27148	0.0231177	0.319329
UBTD2	48.9534	1.38541	0.610309	2.27001	0.0232072	0.319571
MORF4L2	60.9453	-1.412	0.622244	-2.2692	0.0232561	0.319571
C17orf70	12.6613	-2.64978	1.16777	-2.2691	0.0232621	0.319571
SNORA7B	392.793	-2.03756	0.898094	-2.26876	0.0232829	0.319571
CFD	7.90252	-3.56574	1.5717	-2.26871	0.0232861	0.319571
CPOX	32.4431	-2.44738	1.07887	-2.26846	0.0233015	0.319571
CLASP2	41.2795	1.70871	0.753471	2.26779	0.0233419	0.31959
MAP2K1	85.9132	1.165	0.513778	2.26752	0.0233583	0.31959
OR51B2	3.37992	-5.45101	2.40556	-2.266	0.0234511	0.32048
ANKH	32.3281	1.95195	0.862032	2.26436	0.023552	0.321117
C19orf33	53.3912	-2.39751	1.05881	-2.26434	0.0235534	0.321117
EXTL2	21.8207	1.72545	0.762505	2.26287	0.0236437	0.321968
TSNARE1	13.1702	-2.01924	0.892811	-2.26167	0.0237179	0.322598
C20orf72	44.9948	1.41036	0.623804	2.26091	0.0237651	0.322859
SLU7	238.817	1.94999	0.862906	2.2598	0.0238338	0.323411
GRAMD2	5.76863	-4.3479	1.9253	-2.25829	0.0239273	0.324298
PSMD14	247.761	1.26295	0.559919	2.2556	0.0240958	0.325598
DMAP1	18.8088	-1.69036	0.749556	-2.25515	0.0241238	0.325598
TMEM51	27.2877	-1.86666	0.827781	-2.25502	0.0241323	0.325598
NDUFS7	19.7556	-1.99111	0.883012	-2.25491	0.0241392	0.325598
REXO1L2P	13.7516	-3.396	1.50632	-2.25451	0.0241644	0.325598
MAP3K1	208.01	1.69075	0.750202	2.25372	0.0242136	0.325694
GSS	93.1733	-1.34384	0.596355	-2.25343	0.024232	0.325694
HIST1H2AI	106.765	-1.04737	0.464972	-2.25255	0.0242873	0.325694
SNHG5	201.687	-1.39881	0.62099	-2.25255	0.0242874	0.325694
KIAA0232	19.6962	-2.28249	1.01347	-2.25215	0.0243127	0.325694
ZNF678	9.62643	-2.64514	1.17473	-2.25169	0.0243417	0.325704
IMPDH2	88.3132	1.23484	0.548875	2.24977	0.0244635	0.326955
MBTPS1	84.3508	-1.49697	0.665604	-2.24903	0.0245104	0.327202
SCARNA3	233.118	-2.69269	1.19769	-2.24823	0.0245616	0.327507
FNDC3A	259.017	1.55932	0.694074	2.24662	0.0246645	0.3285
ATP10B	95.52	1.87847	0.836927	2.24448	0.0248014	0.329942
PACS1	66.9901	1.22442	0.546053	2.24231	0.0249415	0.330304
RP9	47.4871	1.78707	0.797002	2.24224	0.0249462	0.330304
CFH	138.425	2.12199	0.946842	2.24112	0.0250184	0.330304
ATP9B	9.69132	-2.37331	1.05926	-2.24053	0.0250567	0.330304
TMF1	21.0205	-2.21754	0.989762	-2.24048	0.0250597	0.330304
ZNF384	36.2191	1.56512	0.698639	2.24024	0.0250753	0.330304
R3HDM4	68.1124	-1.64438	0.734041	-2.24017	0.0250799	0.330304
CDC25C	12.9341	-2.12721	0.949596	-2.24012	0.025083	0.330304
HES4	48.298	-2.42982	1.08471	-2.24007	0.0250864	0.330304
PDSS1	17.1891	1.9277	0.861484	2.23765	0.0252439	0.331998
SCN5A	2.93653	-5.23079	2.34003	-2.23535	0.0253944	0.333067
CDH3	120.236	-2.70122	1.20847	-2.23524	0.0254016	0.333067
SNRNP200	238.546	1.19687	0.535492	2.23509	0.0254117	0.333067
HEXIM1	42.5471	-1.5047	0.673701	-2.23348	0.0255172	0.33407
SCP2	38.7249	1.63804	0.733652	2.23272	0.0255672	0.334344
CLIP4	73.5369	-1.45974	0.654075	-2.23177	0.0256302	0.334587
HLA-E	774.995	-1.49681	0.670747	-2.23156	0.0256438	0.334587
PTTG1IP	169.408	1.62712	0.729397	2.23077	0.0256965	0.334677
BMPR2	250.153	1.37474	0.616313	2.23058	0.0257087	0.334677
SIRT2	22.2026	-1.90861	0.856659	-2.22797	0.0258824	0.335966
GTPBP4	108.221	1.09232	0.490297	2.22787	0.0258889	0.335966
HIST1H2BM	83.6412	-1.43005	0.641917	-2.22778	0.0258951	0.335966
GNAI3	192.009	1.37427	0.617351	2.22608	0.0260089	0.336709
CMC1	15.7047	-2.17017	0.975016	-2.22578	0.026029	0.336709
KRT18	629.468	-2.42486	1.08971	-2.22524	0.0260649	0.336709
UQCRHL	45.479	-1.75438	0.78858	-2.22473	0.0260992	0.336709
LOC100507003	4.64005	-5.94464	2.67275	-2.22416	0.0261374	0.336709
CRTC2	46.2685	1.41804	0.637642	2.22388	0.0261562	0.336709
PGLS	37.1014	-1.72184	0.774251	-2.22388	0.0261567	0.336709
ADRBK2	11.1187	-2.47882	1.11536	-2.22243	0.0262542	0.337419
TFE3	61.6075	-1.24899	0.562054	-2.22219	0.0262704	0.337419
DCTN1	81.5218	1.71838	0.773699	2.22099	0.0263515	0.337802
PDE8A	276.443	1.21844	0.548627	2.22089	0.0263587	0.337802
ZFYVE28	4.44784	-4.61252	2.0799	-2.21766	0.0265778	0.340231
LGALSL	72.0195	1.21775	0.549273	2.21703	0.0266214	0.340317
SNX32	3.24196	-4.19139	1.89094	-2.21657	0.0266528	0.340317
RDX	92.4983	1.74959	0.78943	2.21627	0.026673	0.340317
BCAS3	28.4733	-1.76794	0.798055	-2.21531	0.0267388	0.340779
U2AF1L4	2.59392	-5.04719	2.27887	-2.21478	0.0267749	NA
HIST3H2A	40.8058	-1.83261	0.827515	-2.2146	0.0267875	0.341024
TOR1AIP2	84.7229	1.4263	0.6447	2.21234	0.026943	0.342506
ATP6AP1L	6.88442	-3.36672	1.52225	-2.21167	0.0269894	0.342506
MOV10	56.0063	-1.39238	0.629573	-2.21162	0.0269931	0.342506
MAP2K2	41.8356	1.75922	0.795657	2.21103	0.0270338	0.342547
SCD	791.603	-1.82291	0.824582	-2.21071	0.0270557	0.342547
ZFP36	145.679	-1.57642	0.713226	-2.21026	0.027087	0.342568
IQSEC1	2.7909	-5.17995	2.3446	-2.20931	0.0271532	NA
LAMC1	109.147	1.56915	0.710579	2.20827	0.0272257	0.34333
FAM18B1	72.6036	-1.23251	0.558214	-2.20795	0.0272477	0.34333
EPB49	5.04676	-3.3301	1.50836	-2.20776	0.0272608	0.34333
NR2F1	23.8232	-2.19818	0.995825	-2.20739	0.0272866	0.34333
NLRC5	121.687	-1.8313	0.829675	-2.20726	0.0272961	0.34333
AGPAT2	27.8036	-1.80263	0.817238	-2.20576	0.0274008	0.34382
ATP1B3	154.86	1.44661	0.655924	2.20545	0.0274222	0.34382
PTK2	165.376	-1.42312	0.645293	-2.20539	0.0274269	0.34382
HADHA	159.651	1.42529	0.646449	2.20481	0.0274677	0.34382
HMGXB4	58.1773	1.2659	0.574298	2.20426	0.0275063	0.34382
SESN1	18.4065	1.80254	0.817832	2.20405	0.0275207	0.34382
NADKD1	94.4937	1.24727	0.565984	2.20372	0.0275437	0.34382
PDIA5	124.217	-1.86416	0.846425	-2.20239	0.0276378	0.344621
EPHB2	5.95415	-3.62426	1.64622	-2.20156	0.0276964	0.344785
ARID1B	178.144	1.86168	0.845787	2.20112	0.0277278	0.344785
FBXO3	72.2949	1.16708	0.530285	2.20085	0.0277463	0.344785
DCUN1D5	159.796	1.51489	0.688424	2.20051	0.0277705	0.344785
RAB5C	328.75	0.928844	0.422195	2.20004	0.0278042	0.344832
ZNF169	21.4276	-2.44216	1.11159	-2.197	0.0280206	0.346064
HIST1H2BG	91.3556	-2.15182	0.979457	-2.19695	0.0280237	0.346064
PKP3	95.3888	-2.12575	0.96799	-2.19604	0.0280887	0.346064
ING5	28.3673	-1.47749	0.672818	-2.19597	0.0280941	0.346064
RNF138	79.4415	1.32982	0.605617	2.19581	0.0281055	0.346064
PBXIP1	43.6818	-1.70425	0.776155	-2.19576	0.0281094	0.346064
TYMP	105.116	-2.39091	1.08891	-2.1957	0.0281136	0.346064
MTVR2	7.09385	-3.57723	1.6298	-2.1949	0.0281711	0.346403
NMU	4.63256	-5.91053	2.69551	-2.19273	0.0283265	0.347572
TNFSF18	4.63256	-5.91053	2.69551	-2.19273	0.0283265	0.347572
IL18	44.6331	-2.8382	1.29492	-2.19179	0.0283944	0.347841
ATP1A3	17.7013	-3.1682	1.44561	-2.1916	0.0284087	0.347841
HIPK3	81.3915	-1.51491	0.691558	-2.19058	0.0284821	0.348369
HIST1H4A	32.3297	-1.69804	0.775807	-2.18874	0.0286154	0.34963
SFSWAP	45.7085	1.93153	0.883066	2.1873	0.0287208	0.350546
MAN1B1	10.447	-2.21879	1.01462	-2.18683	0.0287548	0.350589
ACAT2	79.101	1.78465	0.816505	2.18572	0.0288361	0.351209
NUCB2	61.5243	1.44246	0.660221	2.18482	0.0289019	0.35164
FBXO7	110.32	1.07594	0.49292	2.18279	0.0290512	0.353044
TNNI3	15.2177	-2.71882	1.24594	-2.18214	0.0290991	0.353044
TMEM50B	30.0677	-1.50407	0.68933	-2.18193	0.0291151	0.353044
C1orf109	55.2801	1.45071	0.665121	2.18113	0.0291742	0.353044
GLTSCR2	229.447	-1.35806	0.622704	-2.1809	0.0291908	0.353044
TAPT1	47.0115	1.52282	0.698296	2.18076	0.0292009	0.353044
CCS	23.4552	-1.72776	0.792485	-2.18018	0.0292442	0.353196
RHOBTB2	24.7998	2.78635	1.27839	2.17958	0.0292884	0.35336
HIST1H2BB	14.673	-2.2899	1.05088	-2.17902	0.0293299	0.353491
NPAS2	112.215	1.97853	0.908298	2.17828	0.0293852	0.353788
PFDN5	257.075	-1.08813	0.499969	-2.17639	0.0295263	0.354551
BSCL2	42.3445	1.43913	0.661279	2.17628	0.029534	0.354551
MAT2B	95.9272	-1.31656	0.605093	-2.17579	0.0295709	0.354551
RPS27	240.542	-1.71355	0.787558	-2.17578	0.0295715	0.354551
SCAMP3	44.6849	1.36576	0.627965	2.17489	0.0296381	0.35498
NCOA6	142.014	1.29506	0.595698	2.17402	0.0297038	0.355398
TSEN34	54.6774	-1.42795	0.657042	-2.1733	0.0297574	0.355408
PDE2A	4.00384	-3.87966	1.78524	-2.17319	0.0297663	0.355408
IFNGR1	87.88	-1.44508	0.665301	-2.17207	0.02985	0.355794
CDK2AP1	72.4531	1.78137	0.820176	2.17194	0.0298603	0.355794
KDSR	125.614	1.02958	0.474307	2.1707	0.0299538	0.356539
CD44	25.33	-2.33604	1.0766	-2.16982	0.0300201	0.356704
MAZ	315.744	1.05632	0.486852	2.1697	0.0300294	0.356704
PYGL	115.565	-2.14602	0.989715	-2.16832	0.0301343	0.357581
GNPTAB	40.912	2.04057	0.941943	2.16634	0.0302851	0.358348
GMDS	24.4128	-1.57616	0.727589	-2.16628	0.0302901	0.358348
HIST1H3G	123.612	-2.42847	1.12105	-2.16625	0.0302922	0.358348
SLC19A2	41.4828	1.55027	0.715807	2.16577	0.0303286	0.358412
ASAP1	319.797	1.06425	0.491571	2.165	0.0303878	0.358501
NRBP2	50.4064	-1.73914	0.803492	-2.16448	0.0304279	0.358501
OLFM2	3.27816	-5.37617	2.48384	-2.16446	0.0304294	0.358501
DDX21	129.936	1.27659	0.590025	2.16363	0.0304931	0.358885
POLR2I	7.30399	-2.59595	1.20094	-2.1616	0.0306487	0.360153
MRPL20	181.611	-1.35609	0.627407	-2.16141	0.0306633	0.360153
ANKRD28	55.1754	1.56415	0.724246	2.1597	0.030796	0.361343
ASCC3	72.5297	1.46297	0.677661	2.15885	0.0308616	0.361488
B4GALT4	63.2073	1.30688	0.605394	2.15873	0.030871	0.361488
CHIC2	13.6664	-1.84708	0.855917	-2.15801	0.0309271	0.361778
PTPRK	81.8508	1.53313	0.710784	2.15696	0.0310088	0.362366
ITPRIPL2	22.062	-1.87657	0.870334	-2.15615	0.0310719	0.362723
SLBP	115.956	1.15138	0.534092	2.15576	0.0311022	0.362723
ERRFI1	10.0228	-3.1081	1.44235	-2.15488	0.0311713	0.363161
NIT1	13.8631	-2.01872	0.937258	-2.15386	0.0312511	0.363724
PSMB3	219.283	-1.1632	0.540545	-2.1519	0.0314055	0.365152
TTC39C	8.77208	-3.06099	1.42371	-2.15001	0.0315542	0.366512
KIFC2	7.43687	-3.16933	1.47444	-2.14951	0.0315938	0.366597
COL18A1	21.6822	-2.26095	1.05204	-2.14912	0.0316251	0.366597
PICK1	57.3687	-1.32642	0.618044	-2.14615	0.031861	0.368644
ACP5	47.8388	2.44474	1.13935	2.14573	0.0318948	0.368644
INPP5K	79.0184	1.39857	0.651822	2.14564	0.0319021	0.368644
ATG14	40.9336	-1.52748	0.712015	-2.14529	0.0319296	0.368644
SYNGR2	264.661	-1.41274	0.658776	-2.1445	0.031993	0.368671
CYP2B6	9.23341	4.06024	1.89336	2.14446	0.0319958	0.368671
USP33	53.4786	-1.16412	0.543095	-2.14349	0.0320737	0.3692
FICD	16.4417	-1.73454	0.81	-2.14141	0.0322408	0.370753
C3orf58	8.20069	-3.29495	1.53931	-2.14054	0.0323114	0.371195
C5orf30	14.5853	2.32799	1.08783	2.14003	0.032352	0.371291
CAPS2	2.4231	-4.97917	2.32822	-2.13861	0.0324669	NA
PSMA3	17.2876	-2.05086	0.959059	-2.13841	0.0324837	0.371742
SERPINB6	62.7656	-1.34614	0.629564	-2.1382	0.0325002	0.371742
ARIH1	107.086	1.1842	0.553864	2.13807	0.0325113	0.371742
C20orf94	79.5945	-1.5684	0.733604	-2.13794	0.0325212	0.371742
CDC6	78.4568	1.89207	0.8853	2.13721	0.0325807	0.371742
PTGES3	635.722	-1.74147	0.81485	-2.13716	0.0325847	0.371742
DSTYK	34.4111	2.62474	1.22858	2.13639	0.0326477	0.372093
FBXL4	28.5091	1.47616	0.691117	2.1359	0.0326876	0.37218
HPS5	51.0377	1.73544	0.813085	2.13439	0.0328109	0.373185
FBXW4	74.9784	-1.38022	0.646817	-2.13387	0.0328533	0.373185
EEF1A1	4439.75	-1.91141	0.895848	-2.13363	0.0328729	0.373185
SAP25	17.7906	-2.86618	1.34443	-2.13189	0.033016	0.374441
ZC3H13	413.965	1.87148	0.87869	2.12986	0.0331836	0.375972
SCARNA1	27.3899	-2.23036	1.04786	-2.12848	0.033297	0.37656
NAE1	73.3079	1.75652	0.825511	2.1278	0.0333538	0.37656
FEM1B	182.889	0.958933	0.450669	2.1278	0.0333538	0.37656
SYNGAP1	51.3747	1.26993	0.596868	2.12765	0.0333661	0.37656
C15orf52	21.1906	-1.6527	0.777211	-2.12645	0.0334654	0.377312
DANCR	60.688	-1.39409	0.65642	-2.12377	0.033689	0.379462
USP40	34.6757	-1.375	0.647566	-2.12334	0.0337253	0.3795
WNT16	23.2795	-8.27847	3.90163	-2.1218	0.0338547	0.380428
TNIP2	30.5364	-1.62496	0.766083	-2.12113	0.0339107	0.380428
SCMH1	74.17	1.28043	0.603725	2.12088	0.0339316	0.380428
ADORA2B	22.0647	-2.58773	1.22017	-2.12079	0.0339397	0.380428
CSK	161.601	1.39859	0.660235	2.11832	0.0341479	0.382391
ATP2B4	93.6541	1.21575	0.574082	2.11773	0.0341983	0.382583
HBE1	26.6241	-7.11718	3.36198	-2.11696	0.0342631	0.382937
RPS3A	978.869	-1.62851	0.769871	-2.1153	0.0344047	0.384147
SLC25A46	48.4209	1.41343	0.668597	2.11403	0.0345131	0.384985
HIST2H2BC	14.4921	-2.08972	0.988846	-2.11329	0.0345756	0.385148
ATP11C	23.5565	2.38789	1.13005	2.11307	0.0345946	0.385148
ROCK2	312.432	1.60716	0.761218	2.1113	0.0347466	0.386468
CTSH	237.235	1.60362	0.760317	2.10915	0.0349317	0.388152
TDP2	142.395	1.01208	0.480436	2.1066	0.0351526	0.390231
WDR5	49.9347	1.20224	0.57099	2.10553	0.0352453	0.390605
C20orf111	102.983	-1.06209	0.504452	-2.10543	0.035254	0.390605
BRF1	5.64306	-2.87956	1.36809	-2.1048	0.0353089	0.390837
GPCPD1	19.8708	-1.86735	0.887486	-2.10409	0.0353707	0.391146
ALG12	36.0571	1.59834	0.759943	2.10324	0.0354447	0.391361
LOC202781	36.8095	1.48752	0.707302	2.10309	0.035458	0.391361
C6orf106	185.751	1.18938	0.56568	2.10257	0.0355038	0.391492
DDB2	14.384	-1.85972	0.885059	-2.10124	0.0356201	0.392052
FAS	12.1861	-2.77013	1.31835	-2.10121	0.0356226	0.392052
RPS12	1875.41	-1.34057	0.639393	-2.09662	0.0360268	0.394155
CLTB	52.7935	-1.11814	0.533318	-2.09657	0.0360314	0.394155
PSME3	143.313	-1.63547	0.780145	-2.09637	0.0360492	0.394155
FDXR	17.0641	-2.59954	1.24003	-2.09636	0.0360504	0.394155
BRWD3	9.74101	-2.01047	0.959177	-2.09603	0.0360794	0.394155
SH3BP4	46.0509	-1.24518	0.594155	-2.09572	0.036107	0.394155
EMC4	137.563	0.96831	0.462065	2.09562	0.0361163	0.394155
DDX41	25.7519	-1.60032	0.76366	-2.09559	0.0361185	0.394155
NXF1	57.0233	-1.30764	0.62405	-2.09541	0.0361349	0.394155
PHF5A	108.423	-1.60106	0.764163	-2.09518	0.0361554	0.394155
BLOC1S5	30.386	-1.43737	0.686476	-2.09384	0.0362747	0.394461
ZNF224	22.3078	-1.64967	0.788009	-2.09346	0.0363081	0.394461
ANKRD40	133.376	1.15952	0.553893	2.0934	0.0363132	0.394461
C8orf59	142.786	-1.12727	0.538602	-2.09296	0.0363527	0.394461
TIMELESS	45.1581	1.31824	0.629852	2.09294	0.0363544	0.394461
LPIN1	27.6581	1.71549	0.820142	2.0917	0.0364651	0.394779
HS1BP3	70.7647	1.54409	0.738259	2.09153	0.0364804	0.394779
ROR1	23.496	1.95236	0.933489	2.09146	0.0364864	0.394779
LRP5	237.497	1.57426	0.753402	2.08954	0.036659	0.396275
SNRPD2	117.731	-1.5955	0.763829	-2.08881	0.0367244	0.396379
CETN3	14.8283	-2.62203	1.25536	-2.08867	0.0367374	0.396379
FAM160A2	33.3691	-1.26538	0.60603	-2.08798	0.0367992	0.396649
USP28	66.6005	-1.46068	0.699683	-2.08763	0.0368312	0.396649
S100A2	24.4328	-2.23679	1.07174	-2.08706	0.0368829	0.396835
OXNAD1	10.4428	-2.5867	1.24051	-2.08519	0.037052	0.398283
B3GNT5	24.7568	-1.73371	0.831871	-2.08411	0.0371504	0.398772
TRAK1	87.7371	1.26774	0.608485	2.08344	0.0372113	0.398772
FAM20C	3.48451	-4.20008	2.01608	-2.08329	0.0372246	0.398772
PHKB	36.9103	-1.71592	0.824005	-2.08242	0.0373041	0.398772
TATDN3	49.3318	1.40185	0.673297	2.08206	0.0373367	0.398772
ATP5B	429.647	-1.4377	0.690623	-2.08174	0.0373665	0.398772
EID1	164.09	1.93054	0.927379	2.08172	0.0373682	0.398772
GABPA	62.6695	-1.3938	0.669794	-2.08094	0.037439	0.398772
CTSZ	330.812	1.15854	0.556798	2.08071	0.0374603	0.398772
FBXW5	75.4409	-1.11098	0.53398	-2.08056	0.0374742	0.398772
POLR1B	65.8244	1.29699	0.623397	2.08052	0.0374778	0.398772
ITIH4	3.54977	-5.50488	2.64675	-2.07986	0.0375385	0.39905
FAM200B	14.972	2.37236	1.14107	2.07907	0.0376107	0.399449
PLOD3	201.229	1.39621	0.671814	2.07827	0.0376848	0.399868
LYZ	989.426	-2.46638	1.18744	-2.07705	0.0377966	0.400317
HIST1H2AK	29.5857	-1.33149	0.641145	-2.07673	0.0378266	0.400317
LOC100506713	19.2515	1.64972	0.794419	2.07664	0.0378351	0.400317
FAM43A	3.68723	-3.95698	1.90581	-2.07627	0.0378689	0.400317
SRPRB	63.8844	1.61601	0.778454	2.07593	0.0379007	0.400317
C16orf70	145.747	1.16949	0.563571	2.07514	0.0379734	0.400719
NDFIP1	122.631	1.17721	0.567413	2.0747	0.0380146	0.400786
C14orf101	11.8265	-2.46614	1.18965	-2.073	0.0381727	0.402086
WRAP53	8.33483	-2.78635	1.34478	-2.07197	0.0382683	0.402725
MDFI	12.6238	-2.73997	1.32292	-2.07116	0.0383441	0.403032
IL29	3.12645	-4.06623	1.9635	-2.07091	0.0383674	0.403032
LOC100288069	41.6981	-1.69344	0.818251	-2.06959	0.0384912	0.403965
CLN6	311.489	1.59463	0.770699	2.06907	0.0385396	0.404105
NXPE3	24.6761	3.01144	1.45592	2.06841	0.0386017	0.404389
NCF2	2.35919	-4.27237	2.06612	-2.06782	0.0386571	NA
GPR180	46.3415	1.58143	0.764799	2.06778	0.0386612	0.404579
BRAF	127.856	1.51345	0.732087	2.06732	0.0387045	0.404579
SUPT7L	122.578	1.06972	0.517664	2.06644	0.0387866	0.404579
EDEM1	131.707	1.30604	0.632071	2.06629	0.0388009	0.404579
AKAP12	63.2086	-2.79298	1.35172	-2.06624	0.0388056	0.404579
TRAF4	127.978	-0.959051	0.464279	-2.06568	0.0388586	0.404579
ZSWIM6	34.2748	-1.76572	0.854819	-2.06561	0.0388654	0.404579
CERK	71.0605	1.75695	0.851575	2.06318	0.0390959	0.406611
EBP	111.941	1.00953	0.489598	2.06195	0.0392121	0.406706
MIEN1	68.157	-1.27623	0.619017	-2.06171	0.0392353	0.406706
COX17	218.323	-1.30279	0.631991	-2.06141	0.0392641	0.406706
UBN1	87.5513	-1.09345	0.530462	-2.06132	0.0392724	0.406706
TMEM230	43.4989	-1.62884	0.790227	-2.06123	0.0392813	0.406706
CPE	19.7288	-8.0391	3.90246	-2.06001	0.0393977	0.406776
FAM100B	194.449	-1.39773	0.678528	-2.05994	0.0394045	0.406776
MED12L	5.4316	-6.18005	3.00043	-2.05972	0.0394249	0.406776
BMI1	31.6669	-1.82027	0.883766	-2.05968	0.0394291	0.406776
BACE1	29.0325	1.85257	0.899775	2.05892	0.0395019	0.406977
ZNF12	8.2858	-2.11315	1.02643	-2.05874	0.0395192	0.406977
OSBPL8	116.495	1.2095	0.587724	2.05795	0.0395952	0.4071
RBM10	63.0798	-1.57301	0.76453	-2.05748	0.0396396	0.4071
TMEM206	29.2212	1.8297	0.889292	2.05747	0.0396406	0.4071
OCRL	7.94792	-2.57984	1.25409	-2.05714	0.0396723	0.4071
VMP1	373.35	-1.21206	0.589492	-2.05611	0.0397718	0.407758
ITGB3BP	22.972	-1.66371	0.809378	-2.05554	0.039827	0.407962
MFAP3	50.7659	1.38071	0.672182	2.05407	0.0399688	0.408082
HID1	28.0804	-2.15694	1.05018	-2.05388	0.0399876	0.408082
BCAS4	3.85249	-3.97217	1.93418	-2.05367	0.0400072	0.408082
IER3	203.621	-1.94491	0.947057	-2.05363	0.0400112	0.408082
PTBP2	31.0591	1.86231	0.906857	2.05359	0.0400157	0.408082
ZFHX4	3.94276	-5.67091	2.76238	-2.05291	0.0400817	0.408394
MRPL3	378.424	0.991325	0.483671	2.04959	0.0404049	0.411231
GDI1	170.663	1.03359	0.504445	2.04897	0.0404649	0.411231
CCNG2	27.0877	-2.24229	1.09436	-2.04895	0.040467	0.411231
DRAP1	309.35	-1.04734	0.511299	-2.04839	0.040522	0.411427
KCNJ3	5.33973	2.94402	1.4375	2.04802	0.0405582	0.411432
SCFD1	109.239	-1.11623	0.545457	-2.04641	0.040716	0.412669
PROCR	41.9489	-1.36836	0.669203	-2.04476	0.0408782	0.413925
CATSPERB	4.50397	-4.31771	2.11198	-2.04439	0.0409152	0.413925
H3F3A	331.665	-1.79884	0.880233	-2.0436	0.0409932	0.413925
CYP4V2	32.1911	1.57469	0.770622	2.0434	0.0410127	0.413925
GHRLOS2	11.8811	-2.13523	1.04501	-2.04327	0.0410254	0.413925
SNAPC3	146.85	1.33409	0.653018	2.04296	0.0410566	0.413925
FAM53C	79.7874	1.13507	0.555754	2.0424	0.0411117	0.413925
ANKRD20A9P	11.7826	-1.96163	0.960524	-2.04225	0.0411269	0.413925
SORD	43.6576	1.36647	0.669731	2.04032	0.0413182	0.414506
BSG	347.71	-1.29217	0.633495	-2.03974	0.0413763	0.414506
C7orf60	30.6436	1.78014	0.87296	2.03919	0.0414306	0.414506
GCDH	15.5652	2.0962	1.02799	2.03913	0.0414371	0.414506
HPCAL1	105.57	-1.36186	0.667901	-2.03901	0.0414488	0.414506
NOL7	56.2043	1.68589	0.826984	2.03861	0.0414894	0.414506
OR51B4	2.95313	-4.42872	2.17292	-2.03815	0.0415354	0.414506
MAX	40.3045	1.25647	0.616482	2.03812	0.0415375	0.414506
RAB13	115.783	1.15831	0.568368	2.03797	0.0415533	0.414506
EIF5A2	22.9329	1.70255	0.835512	2.03773	0.0415766	0.414506
AP1M1	83.9882	1.21463	0.596078	2.0377	0.04158	0.414506
DNM2	47.2639	2.0547	1.00892	2.03654	0.0416957	0.4153
CHRNB1	14.938	-2.90807	1.42856	-2.03566	0.0417842	0.415823
RPL22	122.392	1.28324	0.63077	2.03441	0.0419107	0.416275
SARNP	33.6341	-1.81126	0.890424	-2.03415	0.0419364	0.416275
LAS1L	71.1772	1.43684	0.706374	2.0341	0.0419414	0.416275
TSPAN17	37.4715	-1.47407	0.724893	-2.0335	0.0420023	0.416275
FYN	41.8517	2.4409	1.20039	2.03342	0.0420101	0.416275
FLJ31306	23.2293	-1.51881	0.747102	-2.03294	0.0420583	0.416395
CDK8	108.82	1.55167	0.763559	2.03215	0.0421382	0.416829
PROX1	63.477	2.59919	1.27936	2.03163	0.0421907	0.41699
DNA2	89.0534	-1.5209	0.748752	-2.03125	0.04223	0.417021
NDUFB10	23.0163	-1.61685	0.796206	-2.0307	0.0422856	0.417213
CRLS1	57.0262	1.37888	0.679363	2.02967	0.0423903	0.417888
PRKCE	28.7054	1.56674	0.772689	2.02765	0.042596	0.419558
COQ5	21.2731	-2.04749	1.01036	-2.0265	0.0427136	0.420255
PKN3	9.97398	-2.42434	1.19729	-2.02484	0.0428833	0.420255
TUBGCP4	100.485	1.21043	0.59782	2.02474	0.0428937	0.420255
HMGN2	256.67	-1.24496	0.614923	-2.02457	0.0429114	0.420255
GAS6	4.67706	-3.80054	1.87739	-2.02438	0.0429313	0.420255
THAP5	15.8463	-2.56832	1.26883	-2.02417	0.0429527	0.420255
KIAA1432	64.8951	1.46906	0.725843	2.02394	0.042976	0.420255
MARVELD1	65.9562	1.20516	0.595498	2.02378	0.0429924	0.420255
RHOF	38.3709	-2.14533	1.0604	-2.02313	0.0430601	0.420255
PLEKHO1	3.19326	-4.11536	2.03421	-2.02307	0.0430656	0.420255
SPATA2L	16.0084	-1.85666	0.917749	-2.02305	0.0430675	0.420255
SMCHD1	196.589	-1.16908	0.578009	-2.02259	0.0431155	0.420367
LOC728190	4.46997	-3.03419	1.50068	-2.02187	0.0431894	0.420732
TAB3	69.9753	1.78202	0.881741	2.02103	0.043277	0.421008
CTNNAL1	22.0217	-1.87559	0.928101	-2.02089	0.0432907	0.421008
ALOXE3	4.18502	-4.54919	2.25364	-2.0186	0.0435292	0.42297
EIF3I	43.3412	-1.94858	0.966654	-2.0158	0.0438214	0.425451
SCAMP4	70.1119	1.15824	0.574945	2.01453	0.0439537	0.425803
HSPH1	129.095	1.12094	0.556431	2.01452	0.0439548	0.425803
RELB	70.1355	-1.94051	0.963566	-2.01389	0.0440213	0.425803
DCUN1D4	26.5166	-1.65187	0.820317	-2.0137	0.0440412	0.425803
PRDX1	3.65249	-5.59054	2.77627	-2.01369	0.0440422	0.425803
EXOSC5	57.3593	-1.15018	0.571629	-2.01211	0.0442085	0.426813
SEC23B	106.861	-1.3644	0.678134	-2.01199	0.0442207	0.426813
PUS10	8.68623	-2.67592	1.33079	-2.01077	0.0443493	0.427662
LATS1	107.322	1.39177	0.692325	2.01028	0.0444012	0.427662
JKAMP	25.3059	-1.53322	0.762756	-2.01011	0.0444199	0.427662
NAP1L5	6.33169	-2.76986	1.37851	-2.00932	0.0445031	0.428106
RPL8	239.969	-1.55087	0.772227	-2.0083	0.0446109	0.428785
TSPAN9	16.4098	2.3876	1.18971	2.00688	0.0447623	0.429493
CHRNA5	56.8829	1.34641	0.670992	2.0066	0.0447922	0.429493
GTF3C1	86.8559	-1.27159	0.633716	-2.00656	0.0447962	0.429493
ELOF1	41.2856	1.28759	0.641925	2.00582	0.0448752	0.429893
H2AFY2	10.6217	-3.23321	1.61279	-2.00473	0.0449919	0.430269
APOPT1	3.93571	-4.395	2.19234	-2.00471	0.0449945	0.430269
RAB7L1	19.4122	2.06912	1.03229	2.00441	0.0450264	0.430269
TM9SF3	230.603	1.39653	0.696876	2.00398	0.045072	0.430348
RNASE1	4.46882	-4.07928	2.03684	-2.00275	0.0452042	0.430387
SRI	86.4206	-1.2334	0.616085	-2.002	0.0452844	0.430387
CD58	69.3335	-1.53281	0.765928	-2.00125	0.0453655	0.430387
UBQLN2	153.328	0.967654	0.483545	2.00117	0.0453744	0.430387
PDGFRL	3.95843	-4.38487	2.19186	-2.00052	0.0454437	0.430387
VSNL1	3.95843	-4.38487	2.19186	-2.00052	0.0454437	0.430387
EEF1G	647.815	-1.51914	0.759482	-2.00024	0.0454747	0.430387
PARM1	4.82608	-3.78992	1.89474	-2.00024	0.0454748	0.430387
TMEM41B	72.2884	-1.36371	0.682004	-1.99956	0.0455473	0.430387
OGG1	21.7406	1.66358	0.832142	1.99915	0.0455922	0.430387
ERBB3	208.394	1.21686	0.608694	1.99913	0.0455947	0.430387
ABP1	20.3295	-2.2338	1.11743	-1.99906	0.0456017	0.430387
PIK3R2	181.376	0.912914	0.456707	1.99891	0.0456185	0.430387
ZNF706	161.413	1.32295	0.661888	1.99875	0.0456357	0.430387
OCIAD2	104.93	-1.98574	0.993495	-1.99875	0.0456358	0.430387
EIF1AD	16.0808	-2.23873	1.12052	-1.99794	0.045723	0.430857
MCF2L	69.5481	1.78296	0.892789	1.99707	0.0458179	0.431087
RPS9	273.251	-1.3613	0.681661	-1.99703	0.0458221	0.431087
MAP7D1	46.0256	-1.49829	0.750682	-1.9959	0.0459451	0.431891
RPL7A	430.365	-0.996787	0.499744	-1.99459	0.0460871	0.432873
YIF1A	176.671	1.09449	0.54883	1.99422	0.0461283	0.432908
NETO2	57.7928	1.27845	0.641609	1.99257	0.0463083	0.434244
STARD10	173.996	-1.40032	0.702943	-1.99208	0.0463628	0.434381
MPP2	16.3891	-7.77272	3.90356	-1.99119	0.0464603	0.434381
VGLL4	19.2257	2.35934	1.18497	1.99105	0.046475	0.434381
PER3	34.7752	1.81355	0.910913	1.99091	0.0464905	0.434381
GNL2	210.493	1.41208	0.709331	1.99072	0.0465112	0.434381
HERC5	117.815	-2.137	1.07441	-1.989	0.0467008	0.435798
WDR48	24.9468	-1.43254	0.720563	-1.98808	0.0468026	0.436395
HSD17B4	181.276	0.927412	0.466615	1.98753	0.0468634	0.43661
PGRMC1	178.816	0.988398	0.497901	1.98513	0.0471299	0.438561
GTF2H3	37.0646	-1.70469	0.858939	-1.98465	0.0471837	0.438561
MCRS1	46.7876	-1.38187	0.696288	-1.98462	0.0471869	0.438561
ITGA3	265.621	-1.90246	0.958801	-1.98421	0.0472328	0.438599
GPR115	15.7739	-2.2318	1.12496	-1.9839	0.047267	0.438599
UBXN2A	25.3082	1.57578	0.794506	1.98335	0.0473282	0.438624
WASF2	179.509	1.20149	0.605835	1.98319	0.0473458	0.438624
FAM118B	80.6828	1.37199	0.693444	1.97851	0.0478711	0.443135
MYO6	163.784	-1.42822	0.722191	-1.97762	0.0479713	0.443706
CLYBL	19.131	-1.7792	0.899988	-1.97692	0.0480507	0.443785
C9orf156	43.0904	2.00962	1.01664	1.97673	0.0480724	0.443785
TXNDC5	203.443	1.16617	0.590119	1.97616	0.0481362	0.443785
LOC100132352	4.32338	-2.97531	1.50562	-1.97614	0.0481384	0.443785
VASH1	2.27193	-4.86793	2.46347	-1.97604	0.0481497	NA
RNF217	9.77593	-3.44172	1.7419	-1.97585	0.0481722	0.443785
ELAVL1	61.0929	1.32308	0.670133	1.97436	0.0483408	0.444983
RARRES1	15.9638	2.819	1.42928	1.97232	0.0485731	0.446764
LENG9	41.7843	-1.17835	0.597772	-1.97124	0.0486963	0.44754
RGS2	43.6392	-1.7127	0.86902	-1.97084	0.0487423	0.447603
TSC22D2	2.82869	-3.88027	1.96953	-1.97015	0.0488217	NA
BLOC1S2	59.552	-1.3724	0.69685	-1.96943	0.0489036	0.447603
MTO1	36.7486	1.88156	0.955392	1.96942	0.0489054	0.447603
ASPH	195.169	-0.926249	0.470318	-1.96941	0.0489061	0.447603
PAIP1	326.704	0.883601	0.4488	1.96881	0.0489753	0.447603
PPAT	76.9252	1.05085	0.533828	1.96852	0.0490083	0.447603
MUT	56.3814	1.11086	0.564338	1.96843	0.0490183	0.447603
DOCK3	3.35472	-5.45242	2.77019	-1.96824	0.04904	0.447603
PRKRA	59.7707	1.28398	0.652505	1.96777	0.0490947	0.447603
PFKFB4	17.1364	-2.27135	1.15429	-1.96774	0.0490975	0.447603
ADRBK1	89.6377	-1.07857	0.548206	-1.96746	0.04913	0.447603
CHM	65.0379	1.12911	0.5741	1.96675	0.0492124	0.447913
SAMD8	23.1603	-2.18192	1.10973	-1.96617	0.0492795	0.447913
UBL3	283.973	1.77388	0.90227	1.96602	0.0492962	0.447913
ATAT1	14.4603	-1.78692	0.908995	-1.96582	0.0493194	0.447913
LARP4	103.801	1.2285	0.625197	1.96498	0.0494167	0.448444
STIL	109.024	1.0114	0.514849	1.96446	0.0494773	0.448641
CNPY2	34.7146	-1.29284	0.658495	-1.96332	0.049609	0.449312
PPBP	2.60469	-5.21636	2.65748	-1.9629	0.0496582	NA
ZNF140	30.386	2.08284	1.06135	1.96245	0.0497097	0.449312
CSTF1	39.8603	-1.2416	0.63309	-1.96118	0.0498578	0.449312
TMEM33	199.08	1.44738	0.738036	1.96113	0.0498644	0.449312
LARS2	15.7492	1.95053	0.99466	1.961	0.049879	0.449312
MAPKAPK2	126.493	1.18495	0.604294	1.96089	0.0498922	0.449312
ORMDL3	39.2749	-1.25493	0.640073	-1.96061	0.0499245	0.449312
PLOD2	77.2219	1.55282	0.792044	1.96052	0.0499353	0.449312
KIAA1609	31.6579	-1.54183	0.786455	-1.96048	0.0499395	0.449312
C11orf49	95.9841	1.09065	0.556321	1.96047	0.0499408	0.449312
