# Supplementary material for: Transcriptomic Changes Associated with ERBB2 Overexpression in Colorectal Cancer Implicate a Potential Role of the Wnt Signaling Pathway in Tumorigenesis
Source: Cancers (Basel). 2022 Dec 26;15(1):130. doi: 10.3390/cancers15010130 (PMC9817785; doi:10.3390/cancers15010130)
Supplement: Supplementary file 1 [file cancers-15-00130-s001.zip › Revised_Supplementary Table S2_Clinicopathological characters of the patients.xlsx]

## Sheet: Sheet1
Patient No.	Sample ID	HER2 Grouping	Patient number	Nationality	Age	Sex	Diagnosis	Histologic grade	Pathologic Stage classification (PTNM)
1	H339-15	HER2 Positive	15889	U.A.E.	86	M	Adenocarcinoma	Moderately-differentiated	pT4	pN1	M0 Stage III
2	H278-15	HER2 Positive	62454	Sudan	74	M	Adenocarcinoma	Moderately-differentiated	pT3	pN1	M0 Stage III
3	H19465	HER2 Positive	36447	U.A.E.	43	F	Invasive adenocarcinoma of colon	Moderately-differentiated	pT4	pN0	M0 Stage III
4	H18788-A10	HER2 Positive	138065	Iraq	77	F	Invasive adenocarcinoma of colon	G3: Poorly differentiated	pT3	pN2	M1 Stage IV
5	H19485	HER2 Positive	30458	U.A.E.	75	F	Invasive adenocarcinoma	Moderately-differentiated	pT3	pN0	M0 Stage II
6	H84-15	HER2 Positive	1895	Slovakia	51	F	Adenocarcinoma of the colon	Moderately-differentiated	pT2	pN0	M0 Stage II
7	H18689-A5	HER2 Positive	93938	Lebanon	77	F	Invasive adenocarcinoma of colon	G2: Moderately differentiated	pT4	pN2	M1 Stage IV
8	H90-12	HER2 Positive	7822	U.A.E.	65	F	Invasive colonic adenocarcinoma	Moderately-differentiated	/	/	/
9	H363-16	HER2 Positive	92136	U.A.E.	37	F	High grade dysplasia/intra-mucosal carcinoma arising in a back ground of tubular adenoma. No evidence of invasion in this biobsy	/	pT4	pN0	M0 Stage II
10	H19556	HER2 Positive	1895	Slovakian	51	F	Adenocarcinoma of the colon	Moderately-differentiated	pT3	pN0	M0 Stage II
11	H160-12	HER2 Positive	14360	U.A.E.	49	F	Invasive adenocarcinoma	Low-grade (well differentiated)	pT4	pN0	M0 Stage II
12	H381-15	HER2 Negative	30229	U.A.E.	75	M	Invasive adenocarcinoma of colon	Low-grade (moderately differentiated)	pT4	pN0	M0 Stage II
14	H33-16	HER2 Negative	60576	Sudan	68	F	Invasive adenocarcinoma of colon	Low-grade (moderately differentiated)	pT3	pN1	M0 Stage III
15	H7-16	HER2 Negative	76516	U.A.E.	59	M	Invasive adenocarcinoma of colon	Moderately-differentiated	pT4	pN1b	M0 Stage III
