# Supplementary material for: Transcriptomic Changes Associated with ERBB2 Overexpression in Colorectal Cancer Implicate a Potential Role of the Wnt Signaling Pathway in Tumorigenesis
Source: Cancers (Basel). 2022 Dec 26;15(1):130. doi: 10.3390/cancers15010130 (PMC9817785; doi:10.3390/cancers15010130)
Supplement: Supplementary file 1 [file cancers-15-00130-s001.zip › Revised_Supplementary Table S3_DEGs_ patients.xlsx]

## Sheet: Patients_CRC
Gene	baseMean	log2FoldChange	lfcSE	stat	pvalue	padj
SCARNA1	475.857	-3.89326	0.633563	-6.14503	8e-10	1.37e-05
SNORA41	1493.19	-3.6897	0.617838	-5.97196	2.34e-09	1.8e-05
COL7A1	264.319	3.80287	0.641965	5.92379	3.15e-09	1.8e-05
SOWAHC	133.509	3.30636	0.57685	5.73175	9.94e-09	3.51e-05
EPHX2	165.455	5.20932	0.914132	5.69865	1.21e-08	3.51e-05
SCARNA14	65.9921	-4.73474	0.831258	-5.69587	1.23e-08	3.51e-05
G6PD	61.4328	6.85499	1.20986	5.66595	1.46e-08	3.58e-05
NRDE2	66.7225	5.41347	0.961433	5.63062	1.8e-08	3.85e-05
SPIN4	103.919	3.1466	0.601138	5.23441	1.66e-07	0.000292372
RCOR2	44.4697	7.35958	1.40746	5.22899	1.7e-07	0.000292372
TBC1D2	45.5278	6.40656	1.23977	5.16753	2.37e-07	0.000369922
RNU12	27829.5	-3.97938	0.781725	-5.09051	3.57e-07	0.00047255
SCARNA18	21439.1	-3.79222	0.745038	-5.08997	3.58e-07	0.00047255
SNORA75	9734.36	-3.54457	0.708597	-5.00223	5.67e-07	0.000694364
PADI2	59.7318	7.76315	1.57073	4.94239	7.72e-07	0.000882522
SNORA66	9011.73	-3.55482	0.734542	-4.83951	1.3e-06	0.00133998
GCDH	59.4015	5.78166	1.19566	4.83552	1.33e-06	0.00133998
CLTCL1	25.2714	6.53727	1.36554	4.78733	1.69e-06	0.00161071
ACTRT1	10.1177	-7.42242	1.56083	-4.75544	1.98e-06	0.00178772
ARFGAP1	67.0626	3.09957	0.653503	4.74302	2.11e-06	0.00180597
AP1G2	154.727	2.69567	0.569872	4.73031	2.24e-06	0.00183121
CRYGS	31.0256	6.82079	1.44752	4.71206	2.45e-06	0.00190197
TRIM39	55	2.80029	0.595289	4.70408	2.55e-06	0.00190197
OR2M7	5.97474	-6.38322	1.36315	-4.6827	2.83e-06	0.00202357
OR2Z1	8.44712	-5.7348	1.2289	-4.66662	3.06e-06	0.00205479
TRIO	314.951	2.23189	0.478625	4.66313	3.11e-06	0.00205479
MGC3771	19.0094	-3.42561	0.740073	-4.62875	3.68e-06	0.00229083
TPPP3	69.5358	4.784	1.03429	4.62537	3.74e-06	0.00229083
SNORA19	454.749	-3.62097	0.788703	-4.59105	4.41e-06	0.00260873
SNORA1	1117.29	-3.04108	0.665456	-4.56992	4.88e-06	0.00278982
ALKBH8	61.4767	-1.8457	0.411387	-4.48653	7.24e-06	0.00400594
OSCP1	17.7464	6.01958	1.34766	4.4667	7.94e-06	0.00414716
SPEN	156.251	2.22167	0.497812	4.46286	8.09e-06	0.00414716
OR51G1	8.97516	-6.44646	1.4456	-4.45938	8.22e-06	0.00414716
BCAR3	40.3656	4.25938	0.96135	4.43062	9.4e-06	0.00438458
SNORA48	4307.88	-3.28772	0.742445	-4.42824	9.5e-06	0.00438458
LIN37	105.144	3.12027	0.705132	4.42509	9.64e-06	0.00438458
LINC00607	6.40457	-5.57613	1.26217	-4.4179	9.97e-06	0.00438458
SNORA36A	419.373	-2.97546	0.673507	-4.41786	9.97e-06	0.00438458
DDHD2	152.061	2.28806	0.521017	4.39153	1.13e-05	0.00473675
FOXRED2	24.4505	6.48452	1.47732	4.38938	1.14e-05	0.00473675
KCTD15	40.0048	6.16358	1.40671	4.38155	1.18e-05	0.00473675
QPCTL	59.6854	3.10066	0.707931	4.3799	1.19e-05	0.00473675
DUOX2	2217.96	5.93349	1.36089	4.36002	1.3e-05	0.00489256
CDA	79.0411	4.46917	1.02533	4.35877	1.31e-05	0.00489256
SDCBP2	42.7126	4.11947	0.945246	4.3581	1.31e-05	0.00489256
ZNF600	126.221	-2.26057	0.519753	-4.34933	1.37e-05	0.00498403
SNHG4	1865.57	-2.56476	0.591863	-4.33338	1.47e-05	0.00522265
ZNF8	25.1227	4.03808	0.932605	4.32989	1.49e-05	0.00522265
KIAA1984	183.908	3.98422	0.922774	4.31766	1.58e-05	0.00541019
SDE2	175.878	-1.28519	0.298131	-4.31082	1.63e-05	0.00547073
OR4D2	5.12598	-6.12953	1.42544	-4.3001	1.71e-05	0.00563175
NLRP3	13.6046	5.6877	1.32491	4.2929	1.76e-05	0.00565403
FRG1	498.281	-2.2577	0.52654	-4.28781	1.8e-05	0.00565403
OR6T1	3.95835	-6.63882	1.54867	-4.28678	1.81e-05	0.00565403
XDH	74.4034	5.98697	1.39809	4.28224	1.85e-05	0.00566751
NUDT17	19.5127	6.09724	1.42638	4.27461	1.91e-05	0.00576219
SNORA57	8450.93	-3.75291	0.88137	-4.25804	2.06e-05	0.00609932
SNORA69	506.495	-3.19976	0.75235	-4.25301	2.11e-05	0.00613217
CDHR2	280.494	4.85998	1.14405	4.24807	2.16e-05	0.0061646
ERCC2	86.7944	3.68469	0.870266	4.23398	2.3e-05	0.00645646
OSGIN2	307.028	-2.02252	0.478217	-4.2293	2.34e-05	0.00648585
EPS8L1	88.8539	2.93219	0.69551	4.21588	2.49e-05	0.00677453
FOXF1-AS1	20.3924	6.22772	1.48052	4.20644	2.59e-05	0.00695326
ZNF323	23.6535	4.77248	1.13756	4.19536	2.72e-05	0.00718983
TNFRSF1B	58.2088	3.59947	0.860991	4.18061	2.91e-05	0.00745961
PABPC3	2181.6	-2.69829	0.645832	-4.17801	2.94e-05	0.00745961
CEACAM7	68.5464	7.9779	1.91144	4.17376	3e-05	0.00745961
RNF157	69.6206	3.58489	0.859406	4.17136	3.03e-05	0.00745961
FBXO16	27.4109	5.63531	1.35135	4.17015	3.04e-05	0.00745961
KIAA1107	27.5552	5.23599	1.2608	4.15291	3.28e-05	0.0078827
SNORA27	18891.7	-3.11678	0.751031	-4.15	3.32e-05	0.0078827
MEF2B	21.4966	5.33382	1.28589	4.14796	3.35e-05	0.0078827
OR1F2P	5.56976	-4.57587	1.10445	-4.14312	3.43e-05	0.00794221
COASY	328.592	1.82547	0.441317	4.13642	3.53e-05	0.00806854
LRRC6	55.5029	3.81605	0.924495	4.12771	3.66e-05	0.00826991
PCNP	1327.48	-1.6	0.388654	-4.11678	3.84e-05	0.00855933
NECAP2	43.546	2.89553	0.706087	4.10081	4.12e-05	0.00905448
ANXA2P2	328.367	-2.55536	0.624968	-4.08878	4.34e-05	0.00932028
RAPGEF1	22.5101	4.89824	1.19813	4.08824	4.35e-05	0.00932028
PTGES	11.3724	5.42108	1.32716	4.08474	4.41e-05	0.00932732
HCK	39.2817	3.72659	0.912858	4.08233	4.46e-05	0.00932732
LIMS2	37.5786	3.89809	0.956633	4.0748	4.61e-05	0.00947989
FKBP9L	15.8679	-3.28359	0.806195	-4.07295	4.64e-05	0.00947989
CPNE8	18.6519	6.12549	1.50775	4.06267	4.85e-05	0.00979071
CCDC115	492.557	-2.16477	0.53427	-4.05182	5.08e-05	0.0101369
PPFIA3	53.1485	4.39477	1.086	4.04675	5.19e-05	0.0102163
PCYOX1L	37.3771	4.43034	1.09537	4.04461	5.24e-05	0.0102163
RAD1	355.761	-2.21055	0.547593	-4.03685	5.42e-05	0.0104317
ZMYND15	52.7569	3.27774	0.812438	4.03445	5.47e-05	0.0104317
FBXO10	21.0181	4.64647	1.15362	4.02772	5.63e-05	0.0105712
CCDC77	19.8439	6.12287	1.52142	4.02444	5.71e-05	0.0105712
MYOM3	78.2545	4.41645	1.09818	4.0216	5.78e-05	0.0105712
TEP1	108.323	1.84319	0.458379	4.0211	5.79e-05	0.0105712
LLGL1	29.288	2.93467	0.733045	4.0034	6.24e-05	0.0111959
COX7C	1539.22	-1.96504	0.490967	-4.00238	6.27e-05	0.0111959
USP43	29.9274	4.06759	1.01782	3.99637	6.43e-05	0.0111959
INO80B	245.876	2.39128	0.598961	3.99238	6.54e-05	0.0111959
SUSD3	33.2931	4.92244	1.23309	3.99196	6.55e-05	0.0111959
NUMBL	100.467	3.16636	0.79346	3.99057	6.59e-05	0.0111959
CYP2S1	153.048	3.08176	0.772263	3.99055	6.59e-05	0.0111959
FIBCD1	48.5408	4.99304	1.25294	3.98505	6.75e-05	0.0113463
TRIM31	125.583	3.11809	0.783261	3.98091	6.87e-05	0.0113807
FADS3	63.055	3.05717	0.768187	3.97971	6.9e-05	0.0113807
PDE9A	33.218	4.89556	1.23334	3.96935	7.21e-05	0.0116021
SNORA28	5077.46	-2.90625	0.732518	-3.96748	7.26e-05	0.0116021
CFB	150.659	3.55744	0.896735	3.9671	7.28e-05	0.0116021
RCN3	234.921	2.21362	0.558242	3.96535	7.33e-05	0.0116021
PTGER1	29.6973	-4.35411	1.09925	-3.961	7.46e-05	0.0116021
HSF2BP	12.5191	5.54498	1.40046	3.95939	7.51e-05	0.0116021
KRT19	1486.21	1.93215	0.488321	3.95671	7.6e-05	0.0116021
SPTAN1	831.222	1.7563	0.443909	3.95645	7.61e-05	0.0116021
TSPAN5	1655.34	-3.32822	0.841451	-3.95534	7.64e-05	0.0116021
LOC100505839	71.2523	4.48694	1.13539	3.95188	7.75e-05	0.0116676
A2M-AS1	10.438	-5.60766	1.4234	-3.93961	8.16e-05	0.0121741
GUSBP1	9.34571	-4.06253	1.03725	-3.91665	8.98e-05	0.0132215
FLJ27354	17.0209	5.93207	1.51498	3.9156	9.02e-05	0.0132215
C21orf7	22.751	4.49129	1.14865	3.91007	9.23e-05	0.0134134
ETFB	78.2188	2.44389	0.625575	3.90663	9.36e-05	0.0134915
SCARNA16	2211.74	-2.67508	0.685637	-3.9016	9.56e-05	0.01366
C19orf66	127.679	2.72083	0.698513	3.89517	9.81e-05	0.0137989
CDK7	654.608	-2.43084	0.624069	-3.89515	9.81e-05	0.0137989
MTCH2	351.208	-1.48151	0.380867	-3.88985	0.000100308	0.0139804
FABP3	26.9793	3.92484	1.00996	3.88614	0.000101851	0.0139804
RPL31	50.7766	-3.19225	0.821458	-3.88608	0.000101874	0.0139804
GPRC5A	657.513	3.02978	0.780273	3.88298	0.000103185	0.0140479
RPL34	173.084	-2.86457	0.738541	-3.87868	0.000105025	0.0140962
TBX2	34.4739	3.86487	0.996534	3.87831	0.000105183	0.0140962
RSPRY1	141	-1.43481	0.370162	-3.87617	0.000106114	0.0141107
LOC654433	52.5013	4.74707	1.22749	3.8673	0.000110048	0.0145213
SNORA81	1814.96	-2.63404	0.682446	-3.8597	0.000113527	0.0148605
FOXF1	34.4734	3.71891	0.963966	3.85793	0.000114351	0.0148605
SNORD94	18275.5	-2.87089	0.74497	-3.8537	0.000116347	0.0150061
UGT2B7	30.4394	6.81271	1.7694	3.85029	0.000117979	0.0151031
SLC26A3	59.5224	4.83246	1.25607	3.84729	0.000119432	0.0151758
SNORA33	1268.51	-2.30061	0.598738	-3.84244	0.000121819	0.0152998
CORO2A	66.6932	2.38543	0.621047	3.84098	0.000122546	0.0152998
GEMIN7	41.3322	-2.49297	0.649228	-3.8399	0.000123083	0.0152998
PCNT	28.9477	2.58417	0.673699	3.83579	0.00012516	0.0154155
DCST2	39.1038	4.17142	1.08786	3.83452	0.000125811	0.0154155
ZNF593	58.5144	3.06454	0.800298	3.82925	0.000128533	0.0155544
CTSA	568.947	1.96051	0.512041	3.82882	0.000128759	0.0155544
SCARNA15	468.257	-2.24903	0.590347	-3.80968	0.000139145	0.0166916
CLCNKA	21.365	-5.47955	1.43977	-3.80585	0.000141316	0.0166991
HOXB5	286.24	4.30169	1.13044	3.80533	0.000141618	0.0166991
SNORA8	157822	-2.7401	0.720237	-3.80444	0.000142128	0.0166991
SNORA46	5439.07	-3.01899	0.794745	-3.79869	0.000145464	0.0169747
WNT5A	93.1736	2.80816	0.741045	3.78946	0.000150978	0.0174991
RIN2	160.212	1.78069	0.470339	3.78597	0.00015311	0.0176272
STC1	126.041	3.54867	0.938883	3.77967	0.000157038	0.0179589
CYP4F3	89.3796	3.52493	0.935619	3.76748	0.000164901	0.0187332
RAB3B	22.0443	5.2843	1.40377	3.76437	0.000166971	0.0188358
TIMM17A	263.27	-1.86346	0.495328	-3.76207	0.000168514	0.0188358
SESN2	65.2249	2.09394	0.556947	3.75968	0.000170134	0.0188358
SNORA50	16726.4	-3.08112	0.819537	-3.75958	0.000170196	0.0188358
EEF1B2	3109.19	-1.75102	0.46679	-3.7512	0.000175991	0.0193523
RAI2	42.2244	6.13753	1.64085	3.74046	0.000183685	0.0200693
PERP	152.287	-2.73247	0.730829	-3.73887	0.000184852	0.0200693
GRIPAP1	79.499	2.59242	0.693667	3.73728	0.000186024	0.0200695
KRTAP19-5	8.36938	-4.61219	1.23584	-3.73204	0.000189938	0.0202615
LYPD3	15.8521	4.86851	1.30538	3.72957	0.000191807	0.0202615
KIAA1024	10.4303	5.29087	1.41874	3.72927	0.000192037	0.0202615
CLMN	42.4354	2.85024	0.764422	3.72862	0.000192528	0.0202615
MMP3	25.4506	6.55803	1.75971	3.72676	0.000193955	0.0202872
ZNF100	971.673	-2.80998	0.754565	-3.72397	0.000196114	0.0203887
PDE2A	17.9217	5.20251	1.39918	3.71826	0.000200598	0.0207292
FLJ43879	10.1334	-4.16043	1.12021	-3.71397	0.000204033	0.0208938
CLEC16A	49.1296	2.32981	0.627621	3.71213	0.000205523	0.0208938
CCNB1IP1	378.755	-1.81055	0.487943	-3.71058	0.000206783	0.0208938
RPL30	30343.6	-1.73693	0.468144	-3.71024	0.000207062	0.0208938
CAHM	11.9903	5.49662	1.48417	3.7035	0.000212649	0.0213321
TMEM87A	199.49	-2.20555	0.595879	-3.70133	0.000214469	0.0213896
SLC44A5	61.5878	3.96128	1.07088	3.69908	0.000216384	0.0213959
TRERF1	75.2056	3.15164	0.852524	3.69683	0.000218306	0.0213959
CLIC3	25.1028	5.4621	1.47828	3.69491	0.000219967	0.0213959
ITPKB	81.7993	2.66896	0.722496	3.69409	0.000220679	0.0213959
SMN2	182.657	-2.67459	0.724306	-3.69263	0.000221949	0.0213959
NOVA2	22.563	4.23353	1.1465	3.69255	0.000222016	0.0213959
HRSP12	311.794	-2.12377	0.5776	-3.6769	0.000236089	0.022625
KCNH4	21.6658	5.19895	1.41519	3.67367	0.000239094	0.0227856
BBS7	49.4046	2.59103	0.706021	3.6699	0.000242647	0.0229239
CALB2	24.46	6.50612	1.77312	3.6693	0.000243217	0.0229239
MTL5	17.5621	5.971	1.62795	3.66779	0.000244653	0.0229332
SIGLEC1	30.8753	-3.85219	1.05114	-3.66476	0.00024757	0.0230805
ACTC1	9.66902	-2.95021	0.805444	-3.66284	0.000249437	0.0231289
GSDMB	333.535	3.89552	1.06513	3.65733	0.000254856	0.0234568
EPN3	45.1452	4.44342	1.21543	3.65583	0.000256352	0.0234568
UCKL1	176.402	1.90884	0.522239	3.65511	0.000257076	0.0234568
ATP2C1	44.6864	-2.12064	0.580466	-3.65333	0.000258857	0.0234943
PIGG	113.872	1.62349	0.44477	3.65018	0.00026206	0.0235708
SNORA79	393.056	-2.82807	0.774857	-3.6498	0.000262447	0.0235708
BCLAF1	295.49	-1.71553	0.470412	-3.64687	0.000265458	0.0236764
CARD14	19.0578	5.2715	1.44584	3.64597	0.000266384	0.0236764
MST1R	212.558	1.85355	0.50862	3.64427	0.000268155	0.0237109
MCOLN1	125.909	1.90398	0.523348	3.63808	0.000274681	0.0241635
SLC9A1	194.798	2.30994	0.635964	3.6322	0.000281021	0.024595
GNLY	21.3753	5.24178	1.44471	3.62825	0.000285353	0.0248474
KANK2	154.573	2.61568	0.721437	3.62564	0.000288242	0.0249622
PRDM16	26.3613	6.59918	1.82074	3.62445	0.000289582	0.0249622
NHP2	110.124	-1.32828	0.366716	-3.62211	0.000292214	0.0250632
PRF1	21.8875	5.27575	1.45831	3.61771	0.000297221	0.0252469
NEK11	17.8726	3.51129	0.971036	3.61603	0.000299161	0.0252469
RPL11	108840	-2.05673	0.568786	-3.616	0.000299185	0.0252469
SNORA42	9008.65	-3.23526	0.894933	-3.61509	0.000300243	0.0252469
MLPH	18.5381	5.05112	1.39792	3.61331	0.000302318	0.0252974
GFOD1	26.1943	4.72751	1.3096	3.60988	0.000306336	0.0255092
PI4K2A	24.8396	3.00095	0.831766	3.60792	0.00030866	0.0255785
RIMS3	19.4411	5.08761	1.41095	3.6058	0.000311192	0.0256386
DMBT1	274.327	5.0724	1.40712	3.60482	0.000312374	0.0256386
ANGPTL4	34.7506	3.75147	1.04247	3.59863	0.000319902	0.0261314
SSX2IP	200.752	-1.9049	0.52953	-3.59734	0.000321489	0.0261366
SCUBE1	25.306	5.40163	1.50245	3.59522	0.000324114	0.0262059
GUCY1A2	12.2633	5.52957	1.53847	3.59419	0.000325397	0.0262059
ZNF142	133.897	2.53726	0.707635	3.58555	0.000336365	0.0269627
MLH3	32.9808	2.82676	0.789373	3.58102	0.000342256	0.0272688
SNORA70E	228.522	-3.15944	0.882483	-3.58018	0.000343364	0.0272688
PP12613	6.44226	-5.66042	1.5818	-3.57845	0.000345633	0.0273144
NACAP1	43.7978	-2.5719	0.718944	-3.57733	0.000347123	0.0273144
PPP4C	370.036	1.43892	0.402903	3.57139	0.000355096	0.0278133
SNORA30	776.704	-2.64499	0.74085	-3.5702	0.000356705	0.0278133
C2CD4B	175.505	4.18059	1.17285	3.56448	0.000364584	0.028299
TOM1L2	158.803	1.62173	0.455698	3.55878	0.000372581	0.0287895
C1orf116	76.4547	2.68185	0.753955	3.55705	0.000375045	0.0288499
F2R	64.5505	3.49133	0.982238	3.55446	0.000378751	0.0290049
PCSK6	68.9905	2.73554	0.769893	3.55314	0.000380664	0.0290218
ANPEP	130.521	2.66594	0.750578	3.55185	0.000382535	0.0290354
ALPK1	43.4273	2.20342	0.620878	3.54887	0.000386887	0.0291587
SLC25A4	66.165	3.0662	0.864338	3.54746	0.000388971	0.0291587
PLEKHG5	29.5507	4.32376	1.21912	3.54662	0.000390204	0.0291587
VPS37D	11.3957	5.40905	1.52535	3.54611	0.000390958	0.0291587
ZMAT5	11.8417	5.43972	1.53463	3.54465	0.000393141	0.0291795
DKFZP434A062	4.07984	-5.70284	1.60932	-3.54364	0.000394639	0.0291795
EPHA2	386.39	1.88598	0.532647	3.54077	0.000398964	0.0292007
LINC00114	5.34128	-3.96097	1.11868	-3.54075	0.000398991	0.0292007
FTX	318.517	2.41394	0.682071	3.53914	0.000401438	0.0292007
ISOC1	125.148	-1.7089	0.482918	-3.53869	0.000402117	0.0292007
PSD3	120.124	1.81681	0.513596	3.53743	0.000404036	0.0292007
DENND5B	30.554	3.00667	0.850132	3.53671	0.000405139	0.0292007
PXN-AS1	14.645	4.74163	1.34133	3.53503	0.000407736	0.0292649
TTC22	33.7395	3.04869	0.863291	3.53147	0.000413251	0.0295371
MYL5	38.0065	5.37479	1.52333	3.52832	0.000418213	0.0297677
CHST13	53.573	-4.21864	1.19785	-3.52184	0.000428565	0.0303785
KLHL25	42.1161	3.01258	0.858187	3.5104	0.000447441	0.031586
SFSWAP	45.7509	2.17908	0.620989	3.50905	0.000449706	0.0316158
TRIM8	375.051	2.02042	0.576514	3.50456	0.000457369	0.0320233
CCDC146	94.7694	2.17425	0.621207	3.50004	0.000465195	0.0322357
CA11	34.9946	4.78573	1.36754	3.49952	0.000466094	0.0322357
FAM83G	43.9332	2.39929	0.685702	3.49902	0.000466963	0.0322357
PTENP1	9.96364	-2.99574	0.856542	-3.49749	0.000469666	0.0322357
IL1B	80.0491	3.50955	1.00354	3.49716	0.000470237	0.0322357
SF3B5	307.106	1.50244	0.429716	3.49635	0.000471678	0.0322357
OR13C8	25.3088	-5.23201	1.49701	-3.49497	0.000474114	0.0322736
ATP1B3	849.371	-1.91081	0.547006	-3.49321	0.000477252	0.0323
GJC1	8.00737	4.90583	1.4048	3.4922	0.000479058	0.0323
ENTPD8	25.9765	4.84091	1.38645	3.49159	0.000480151	0.0323
GSTA1	15.8147	-3.6544	1.04769	-3.48804	0.00048657	0.032604
LRFN5	25.4003	5.39983	1.54977	3.48428	0.000493471	0.0327192
LOC100506713	54.9993	1.95044	0.55979	3.48423	0.000493557	0.0327192
EPC2	565.871	-1.61328	0.463056	-3.48398	0.000494011	0.0327192
SNORA5A	92244.7	-2.81524	0.808632	-3.48149	0.000498633	0.0328983
MACF1	725.749	1.30923	0.376225	3.47991	0.000501582	0.0329379
FAM40A	93.9472	1.94003	0.557732	3.47843	0.000504362	0.0329379
EXD3	18.2292	4.32505	1.24351	3.47809	0.000504994	0.0329379
ABHD16A	237.977	-1.41184	0.406754	-3.47098	0.000518555	0.0336943
FOXP2	21.6973	4.31446	1.24498	3.46549	0.000529257	0.0342599
RPS6KA1	139.142	1.98634	0.57359	3.463	0.000534191	0.0344493
FAM131B	49.2406	4.00474	1.15703	3.46123	0.000537714	0.0345466
SNORA14B	7333.85	-2.82174	0.815981	-3.45809	0.000544018	0.0348212
SNORA52	39830.4	-2.43861	0.705438	-3.45687	0.000546491	0.0348219
FBXL14	11.3791	-2.93542	0.849463	-3.45562	0.000549023	0.0348219
FAM118A	73.7319	2.07681	0.601157	3.45469	0.000550926	0.0348219
E2F1	127.369	2.52908	0.732258	3.4538	0.000552738	0.0348219
NAALADL1	11.3984	5.40588	1.56551	3.4531	0.000554179	0.0348219
PRICKLE3	27.4291	2.74096	0.794083	3.45174	0.000556993	0.034871
DISP2	11.7294	-2.56507	0.743931	-3.44799	0.000564773	0.0352295
PHF12	38.4285	2.18834	0.635684	3.44249	0.000576383	0.0358235
LOC149134	66.5792	3.5694	1.03792	3.43898	0.000583906	0.03616
TPCN1	154.212	2.0143	0.587364	3.42939	0.000604931	0.0373273
TRIM66	75.5877	2.56904	0.751206	3.41988	0.000626479	0.0385184
ZNF146	22.0667	-3.11226	0.910566	-3.41794	0.000630968	0.0386558
DSC1	4.57507	-4.34955	1.27349	-3.41547	0.000636732	0.0388701
OR10J5	5.17079	-4.84535	1.41996	-3.41232	0.000644131	0.0391823
OR10V1	15.5995	-5.05067	1.48084	-3.41069	0.000647998	0.0392783
OAZ2	8.20238	-3.43805	1.00852	-3.40899	0.000652028	0.0393326
ELMSAN1	55.9703	2.1894	0.642392	3.4082	0.000653935	0.0393326
KIAA1549L	20.0234	6.21408	1.82368	3.40743	0.000655772	0.0393326
TNFRSF1A	238.182	2.22311	0.653117	3.40385	0.000664426	0.0396486
AKR7A2	99.6231	1.66683	0.489763	3.40334	0.000665663	0.0396486
MUC17	119.792	7.55631	2.22183	3.40094	0.000671555	0.0398611
SNORA6	1594.08	-2.43187	0.71563	-3.39822	0.000678257	0.0401201
PIGL	62.9533	3.2142	0.946567	3.39564	0.000684677	0.0403606
PPRC1	158.426	1.45986	0.430111	3.39414	0.000688448	0.0404439
ADRBK1	412.323	1.53878	0.453614	3.39227	0.000693155	0.0405574
ZNF639	442.496	-2.26736	0.668542	-3.3915	0.000695107	0.0405574
SPAG4	18.7788	5.01429	1.47998	3.38807	0.00070385	0.0409283
ECE1	406.205	1.93271	0.571561	3.38146	0.000721016	0.0417848
KPNA3	373.957	-1.39591	0.413037	-3.37963	0.000725833	0.0418478
ACAD11	66.3141	2.33372	0.690613	3.3792	0.000726982	0.0418478
GJA10	3.58294	-5.54589	1.64198	-3.37756	0.000731325	0.041957
TBC1D8B	12.8348	4.52578	1.34055	3.37605	0.000735349	0.04201
TMEM240	9.93243	5.16862	1.53127	3.37538	0.000737146	0.04201
TFAP2C	10.9214	4.46446	1.32523	3.36883	0.000754893	0.0427159
CD5L	4.31325	-5.06537	1.50369	-3.36862	0.00075545	0.0427159
CCNL2	47.9584	2.7209	0.807856	3.36806	0.000757003	0.0427159
RPSA	67.3983	-2.89228	0.859733	-3.36416	0.000767773	0.0429738
HSD17B7P2	113.209	-2.11141	0.627661	-3.36393	0.0007684	0.0429738
SIN3B	311.656	2.42205	0.720057	3.36369	0.000769089	0.0429738
THAP9	37.1821	-1.77784	0.528746	-3.36237	0.000772751	0.0430265
OR7A5	2.42498	-4.29048	1.27634	-3.36156	0.000775048	0.0430265
ALOX12	11.1758	-5.32439	1.58447	-3.36037	0.000778395	0.0430729
ERLIN1	6.69036	-3.32155	0.989018	-3.35844	0.000783844	0.0432194
COMMD10	79.7402	-1.46542	0.436497	-3.35722	0.000787309	0.0432194
FBXO17	13.8536	4.6252	1.37807	3.35629	0.000789957	0.0432194
C17orf70	31.6736	2.10731	0.627945	3.35588	0.000791121	0.0432194
OR5I1	10.1621	-4.66234	1.39026	-3.35357	0.000797758	0.0434436
ATP12A	8.84216	-5.88414	1.75543	-3.35197	0.000802395	0.0435578
CAPSL	4.36228	-4.43502	1.32458	-3.34826	0.000813219	0.0440062
C2orf72	138.519	3.16956	0.946913	3.34725	0.000816162	0.0440266
GABRE	163.717	3.57901	1.06963	3.34601	0.000819831	0.0440383
PCDHGA10	24.7414	-3.63943	1.0881	-3.34476	0.000823532	0.0440383
DANCR	738.109	-2.23766	0.669042	-3.34458	0.000824081	0.0440383
FURIN	295.809	1.80393	0.539588	3.34317	0.000828286	0.0441255
PROC	15.0051	4.7444	1.42009	3.34091	0.000835053	0.0443483
NPBWR2	10.7419	-4.26054	1.27659	-3.33743	0.000845577	0.0447335
SMG8	60.4854	1.75357	0.525525	3.33679	0.000847522	0.0447335
SNRPE	1797.7	-1.78442	0.536398	-3.32667	0.000878898	0.0462473
ASB1	196.356	1.46293	0.439941	3.32529	0.000883268	0.0463351
CCDC169	8.57657	-4.9451	1.48752	-3.32439	0.000886111	0.0463425
SEC14L1P1	11.8847	4.41872	1.3296	3.32334	0.000889464	0.0463765
RPL26L1	364.883	-1.70965	0.514705	-3.32161	0.000894982	0.0465226
SCMH1	215.794	2.36097	0.710971	3.32077	0.000897691	0.0465226
PPAPDC1A	14.9805	4.94875	1.49112	3.31882	0.000903974	0.0467072
IGFBPL1	20.3856	6.23005	1.88141	3.31137	0.000928402	0.0477389
SYNDIG1	16.9841	4.89355	1.47795	3.31104	0.000929509	0.0477389
CADM4	19.848	-2.228	0.673249	-3.30932	0.000935218	0.0478725
TNFRSF10C	25.8409	3.60363	1.08918	3.30858	0.000937692	0.0478725
GPR77	12.5714	5.52514	1.67043	3.3076	0.000940976	0.0478976
DPY19L1P1	31.9599	2.18733	0.662787	3.30019	0.000966179	0.049035
KLHL26	261.885	-3.39818	1.03106	-3.2958	0.000981407	0.049603
AK2	517.294	1.21675	0.369238	3.2953	0.000983153	0.049603
LGR6	38.5594	3.26454	0.991673	3.29196	0.000994931	0.0499076
NABP1	206.583	2.06185	0.626334	3.29193	0.000995009	0.0499076
NSF	88.0923	2.33515	0.709754	3.29008	0.00100161	0.0500919
NEUROG1	3.8281	-4.6706	1.42066	-3.28763	0.00101034	0.0502679
ZNF18	29.3567	2.70985	0.82449	3.2867	0.00101369	0.0502679
SNRNP40	265.258	1.58886	0.483431	3.28664	0.00101391	0.0502679
KIAA0556	78.445	2.33696	0.711466	3.28471	0.00102089	0.0504216
OR5AU1	8.76364	-4.98653	1.5186	-3.28363	0.00102479	0.0504216
CTPS1	68.0557	2.16009	0.657895	3.28334	0.00102583	0.0504216
TGFBR3L	3.1647	-5.45654	1.66276	-3.28162	0.00103212	0.0505859
ABCD4	62.1463	2.51201	0.766465	3.2774	0.00104768	0.0512021
C1orf35	85.4545	2.42724	0.741366	3.27401	0.00106031	0.0514998
RASGRP2	27.5859	-3.53827	1.08092	-3.27337	0.00106271	0.0514998
TRIM25	378.152	2.67698	0.817807	3.27336	0.00106278	0.0514998
CALML6	8.59008	-4.00813	1.22494	-3.27209	0.00106756	0.0515857
CHCHD5	112.534	1.79245	0.548035	3.27068	0.0010729	0.0516979
FBXW11	71.8829	-1.9656	0.601805	-3.26618	0.0010901	0.0522687
GRIK5	30.7336	4.59964	1.40846	3.26572	0.00109186	0.0522687
SPI1	27.1594	2.76442	0.84691	3.26413	0.00109802	0.0522687
MTA1	212.397	1.56125	0.478344	3.26387	0.00109903	0.0522687
NDUFC1	4.52074	-3.15735	0.967511	-3.26337	0.00110095	0.0522687
FEZF1-AS1	13.771	4.83076	1.48054	3.26284	0.00110302	0.0522687
CAMK2N1	1862.43	1.80035	0.552054	3.26119	0.00110947	0.0524187
CEP128	30.4709	2.38048	0.730234	3.25988	0.00111459	0.0524187
CCT8L2	3.45869	-5.86597	1.79955	-3.25969	0.00111536	0.0524187
C1orf210	51.987	2.67614	0.8212	3.25882	0.00111877	0.0524356
FRMD4A	59.7706	2.52189	0.774103	3.25782	0.00112271	0.0524769
PAPPA	26.4387	3.44272	1.05776	3.25471	0.00113506	0.05291
CBWD1	1009.86	-1.95421	0.601328	-3.24982	0.0011548	0.0536839
HIST1H4K	4817.04	-2.1461	0.660976	-3.24686	0.00116684	0.0540973
ENOPH1	519.661	-1.50107	0.462905	-3.24271	0.00118398	0.0547438
ITPK1	179.458	1.43732	0.443423	3.24143	0.00118933	0.0547479
IGSF3	59.1266	1.90092	0.586493	3.24116	0.00119045	0.0547479
ACOT6	3.36979	-4.49911	1.38928	-3.23846	0.00120178	0.054851
FAHD2B	15.5743	-2.24347	0.692965	-3.23749	0.00120585	0.054851
AP1B1	263.402	1.67176	0.516404	3.23731	0.00120661	0.054851
TMEM92	10.9078	4.29133	1.32584	3.23669	0.00120924	0.054851
BRSK2	38.7582	4.88725	1.51013	3.23632	0.0012108	0.054851
MALT1	693.632	-2.2446	0.694078	-3.23393	0.001221	0.054851
KLK11	11.5834	5.44139	1.68275	3.23363	0.00122229	0.054851
POU5F1	90.639	3.7438	1.15792	3.2332	0.00122411	0.054851
MCF2L2	8.72536	5.00604	1.54835	3.23315	0.00122434	0.054851
LOC283693	6.09617	-3.65323	1.13023	-3.23228	0.00122806	0.054851
KIF21A	121.116	-1.87688	0.580776	-3.23167	0.00123069	0.054851
C19orf77	64.0488	2.48165	0.767935	3.23158	0.00123106	0.054851
PTGDR	32.4809	5.74895	1.77992	3.2299	0.00123835	0.0550329
CYP4F8	3.61397	-5.56798	1.72456	-3.22864	0.00124379	0.0551318
COG1	81.6359	1.96925	0.610631	3.22494	0.00125997	0.0557051
DGAT2	50.5547	2.2668	0.703412	3.22258	0.00127041	0.0559613
CENPM	32.6041	2.59371	0.804961	3.22216	0.00127229	0.0559613
NEIL2	19.0423	-2.18217	0.677435	-3.22123	0.00127642	0.0559991
PTBP2	47.575	2.07045	0.643121	3.21939	0.00128466	0.0560721
PDE4C	15.7652	5.87676	1.82602	3.21834	0.00128936	0.0560721
MAP7D3	31.0005	2.71031	0.842239	3.21798	0.00129096	0.0560721
HIST1H4J	4831.03	-2.16063	0.671569	-3.21729	0.00129409	0.0560721
TRIT1	105.406	3.09117	0.960858	3.2171	0.00129495	0.0560721
TMEM33	466.589	-0.971845	0.302145	-3.21649	0.00129769	0.0560721
CCDC147	5.23215	-3.69376	1.14867	-3.21568	0.00130135	0.056089
MOCS2	7.38277	-2.69423	0.838109	-3.21465	0.00130604	0.0561498
UBE2G2	204.391	1.86626	0.580935	3.2125	0.00131584	0.0563581
FAM65B	37.3729	-3.80513	1.1846	-3.21215	0.00131745	0.0563581
SEPT7P2	556.783	-2.64423	0.823678	-3.21027	0.0013261	0.0565396
MUC12	331.792	3.79297	1.18168	3.2098	0.00132829	0.0565396
OR1L6	6.53472	4.56473	1.42321	3.20735	0.00133966	0.0566913
ZNF2	17.6419	-2.62349	0.81801	-3.20716	0.00134051	0.0566913
OR52W1	11.5248	5.39771	1.68342	3.20639	0.00134411	0.0566913
LOXL1	24.9108	-2.6309	0.820571	-3.20619	0.00134507	0.0566913
ATG16L1	53.1281	1.86541	0.582203	3.20405	0.00135509	0.0568678
TUBA8	11.5493	4.35769	1.36019	3.20373	0.00135658	0.0568678
SYTL4	13.9798	3.70826	1.15768	3.20318	0.00135921	0.0568678
MRPS18A	126.891	2.16719	0.67673	3.20245	0.00136264	0.0568728
GPR88	4.27865	-5.25423	1.6415	-3.20088	0.0013701	0.0570454
GPR142	9.67185	-4.06771	1.27187	-3.1982	0.00138287	0.0574376
PDE7B	3.60723	-3.50174	1.09773	-3.18999	0.00142275	0.0589515
TIAM2	26.2442	3.56846	1.12037	3.18508	0.00144714	0.0598175
PEF1	156.873	1.89149	0.594079	3.18391	0.001453	0.0598936
MFAP3L	8.81326	5.00562	1.57245	3.18332	0.00145596	0.0598936
FBXL17	138.046	-1.96298	0.617299	-3.17995	0.00147301	0.0604429
DGCR14	92.1281	2.06015	0.64799	3.17929	0.00147637	0.0604429
OR2G6	6.07984	-4.56597	1.43778	-3.17571	0.00149473	0.0610489
MAPK1	616.321	-1.40816	0.443529	-3.17491	0.00149883	0.0610711
MYO1G	19.5486	-2.36144	0.7446	-3.17142	0.00151693	0.0616622
GOLGA2P5	23.6506	3.90906	1.23304	3.17026	0.001523	0.0617626
HAS3	10.8602	5.33495	1.68418	3.16768	0.00153659	0.0621668
KPTN	6.97367	4.71501	1.48888	3.16681	0.00154119	0.062206
NBL1	5.6786	-4.26319	1.34755	-3.16366	0.00155801	0.0627374
P2RY1	43.6718	-2.40583	0.760931	-3.16169	0.00156855	0.0629134
KRT75	140.648	7.71053	2.4389	3.16148	0.00156972	0.0629134
ZNF441	98.9039	3.05703	0.96792	3.15835	0.00158664	0.0634098
FADD	86.7485	1.43384	0.454242	3.15655	0.00159647	0.0634098
WFDC3	21.8396	4.62231	1.46462	3.15597	0.00159963	0.0634098
ARL14	112.829	2.51832	0.79801	3.15575	0.00160085	0.0634098
CPT2	61.0766	2.06156	0.653518	3.15456	0.00160738	0.0634098
LOC100507053	9.31843	4.08957	1.29641	3.15453	0.00160755	0.0634098
MSN	169.103	2.65364	0.841237	3.15446	0.00160798	0.0634098
WNK4	104.124	3.05644	0.970127	3.15055	0.00162961	0.0639875
GCSH	352.177	-2.16057	0.685827	-3.15031	0.00163095	0.0639875
VRK3	310.689	1.60447	0.509387	3.1498	0.00163382	0.0639875
HPGD	25.3004	5.40361	1.71612	3.14873	0.0016398	0.0640755
P2RY10	34.107	-3.23414	1.02763	-3.14718	0.00164853	0.0642423
RAD52	24.3116	2.10079	0.667628	3.14664	0.00165156	0.0642423
UBXN7	122.344	-1.53945	0.489961	-3.14198	0.00167807	0.0649988
SEZ6	4.80797	-4.03925	1.28581	-3.1414	0.00168144	0.0649988
PROK2	16.7214	5.93114	1.88816	3.14123	0.00168238	0.0649988
FRYL	62.2094	1.74636	0.556104	3.14034	0.0016875	0.0650501
TOM1	209.046	1.6832	0.536496	3.13739	0.00170459	0.0655052
LOC729911	2.31996	-5.49011	1.75012	-3.13699	0.00170694	0.0655052
COL5A3	44.5082	-3.23455	1.03249	-3.13276	0.00173169	0.0662075
FAM92A1P2	2.1194	-5.38174	1.71825	-3.1321	0.00173558	0.0662075
RFK	321.553	-1.86477	0.595413	-3.1319	0.00173682	0.0662075
ACO2	162.732	1.26323	0.403899	3.1276	0.00176238	0.0670329
RNF135	47.6564	1.75138	0.560281	3.12589	0.00177266	0.0672314
MBOAT2	19.2257	3.42747	1.09664	3.12543	0.00177543	0.0672314
BRD8	2.84467	-4.89803	1.56839	-3.12297	0.00179034	0.0676464
SYTL5	40.1938	3.52927	1.13077	3.12113	0.00180161	0.067894
EHD1	97.368	1.99427	0.6391	3.12043	0.00180585	0.067894
MORC2	274.116	1.45807	0.467336	3.11996	0.00180876	0.067894
DHRS9	65.7929	3.82913	1.22815	3.11781	0.00182199	0.0682411
CASP8	14.7501	3.75375	1.20474	3.11581	0.00183438	0.0682882
PLEKHG1	165.209	1.74675	0.560627	3.11572	0.00183499	0.0682882
PDCD5	3090.42	-1.82581	0.586005	-3.11568	0.00183519	0.0682882
LOC155060	41.4853	2.3641	0.75932	3.11344	0.00184919	0.0685754
C12orf68	14.805	-2.8179	0.905155	-3.11317	0.0018509	0.0685754
OR52N1	11.5532	-4.33893	1.39403	-3.11251	0.00185501	0.0685793
KIAA0664	229.383	1.28304	0.41267	3.10911	0.00187649	0.0689475
ACTN4	1622.17	1.33067	0.427996	3.10907	0.00187679	0.0689475
H1FNT	3.99423	-2.99276	0.962772	-3.10848	0.00188052	0.0689475
ANKRD20A4	22.5178	4.61053	1.48371	3.10744	0.00188718	0.0689475
BTNL8	19.1466	5.27919	1.6992	3.10688	0.00189075	0.0689475
DUSP21	7.08505	-4.27691	1.37701	-3.10594	0.00189677	0.0689475
EDA	12.3344	5.4441	1.75303	3.10554	0.00189934	0.0689475
MMP1	25.1692	4.36565	1.40581	3.10543	0.00190002	0.0689475
GPR110	10.8402	5.32333	1.71468	3.10456	0.0019056	0.0689475
PON3	16.4867	4.82951	1.55569	3.10442	0.00190651	0.0689475
RNF113A	165.371	2.28433	0.736026	3.1036	0.0019118	0.0689475
ABCB5	6.7139	-4.24465	1.36797	-3.10287	0.00191653	0.0689475
MRGPRX1	3.62387	-4.82542	1.5552	-3.10277	0.00191722	0.0689475
ZNF582	23.0887	-2.49581	0.804766	-3.10128	0.00192684	0.0690719
SLC44A4	236.037	2.42072	0.780628	3.10099	0.00192873	0.0690719
PLA2G10	61.0367	2.94717	0.950602	3.10032	0.00193309	0.0690839
EFHC1	34.5793	2.51548	0.812	3.09788	0.00194911	0.069362
MAL	25.7462	-3.14141	1.01413	-3.09764	0.00195069	0.069362
CLK2	323.498	2.98295	0.963084	3.09729	0.00195301	0.069362
KRTAP19-2	19.7297	-4.58042	1.48175	-3.09123	0.0019933	0.070647
PCID2	111.168	1.94189	0.628463	3.08991	0.0020022	0.0708161
PXK	42.6985	2.55752	0.82805	3.08861	0.00201095	0.0709792
ARHGEF5	120.44	1.40365	0.454787	3.0864	0.00202598	0.0712771
HRCT1	50.1432	2.72217	0.882061	3.08614	0.0020277	0.0712771
MLIP	2.85141	-4.94969	1.6043	-3.08526	0.00203372	0.071302
ZNF735	3.83479	-4.44948	1.44238	-3.08482	0.00203673	0.071302
LGALS8	210.711	1.69384	0.549455	3.08277	0.00205086	0.0714364
SMN1	553.042	-1.84493	0.598513	-3.08253	0.00205248	0.0714364
NDUFV1	763.42	1.70002	0.551517	3.08245	0.00205306	0.0714364
SCARNA3	5967.53	-2.42148	0.785741	-3.08178	0.0020577	0.0714529
DNAH1	79.922	2.51294	0.815942	3.0798	0.0020714	0.0717835
UBE2V2	501.184	-1.55252	0.504246	-3.0789	0.00207767	0.0718556
KPNA7	6.26314	4.58343	1.48899	3.07822	0.0020824	0.0718741
RHBDL2	46.6191	4.23882	1.37739	3.07742	0.00208798	0.071922
U2AF1L4	11.3994	-3.41602	1.11055	-3.07597	0.0020982	0.0721293
CHAF1B	47.1585	2.3463	0.763357	3.07366	0.00211452	0.0722782
LRRIQ3	7.72428	4.84558	1.57657	3.07349	0.0021157	0.0722782
RNF141	184.306	-1.35136	0.439771	-3.07287	0.0021201	0.0722782
ZBTB44	351.246	-1.34659	0.43822	-3.07286	0.00212017	0.0722782
MALAT1	5676.05	2.46192	0.801307	3.07238	0.0021236	0.0722782
SNORA65	9493.53	-2.17118	0.707012	-3.07092	0.00213401	0.0723738
PDCD11	161.392	1.49659	0.487387	3.07064	0.00213601	0.0723738
AVPR1A	14.9242	4.70054	1.53102	3.07021	0.00213906	0.0723738
H6PD	37.4474	2.19741	0.716097	3.0686	0.00215066	0.0726228
XRN1	35.9943	2.62034	0.85463	3.06605	0.00216906	0.0730643
LOC554206	25.8372	3.81971	1.2462	3.06509	0.00217602	0.0730643
CHAF1A	226.071	2.57283	0.839474	3.06481	0.00217809	0.0730643
EEF1E1	287.559	-1.76484	0.57591	-3.06444	0.00218077	0.0730643
PCNXL4	266.558	-1.60038	0.522438	-3.06328	0.00218922	0.0732045
IZUMO2	3.84969	-5.34561	1.74765	-3.05875	0.00222263	0.0741769
KRTAP6-2	8.83599	-4.10231	1.34187	-3.05716	0.00223448	0.0744277
FAM105B	35.2065	2.17306	0.711201	3.05548	0.00224698	0.0745935
NUGGC	15.216	4.71492	1.54318	3.05533	0.00224815	0.0745935
ETS2	1098.48	1.68808	0.552727	3.05409	0.00225746	0.0747578
NAB2	51.7025	2.06859	0.677723	3.05227	0.00227118	0.075067
RAPGEF3	11.788	4.36941	1.43253	3.05014	0.00228736	0.0754566
CD34	70.0168	2.29945	0.754096	3.04928	0.00229389	0.0755268
METTL20	5.79702	4.46311	1.46415	3.04826	0.00230173	0.0756048
TRIML2	2.1811	-5.26926	1.72886	-3.04782	0.00230508	0.0756048
SBDSP1	349.758	-1.43027	0.469885	-3.04387	0.00233559	0.0764222
RNASE10	3.4857	-5.04585	1.65795	-3.04342	0.00233902	0.0764222
FAM171A1	269.818	-1.65341	0.543529	-3.042	0.00235011	0.0764222
PTGES3	5350.96	-1.56831	0.515595	-3.04175	0.00235206	0.0764222
EMR2	71.5383	2.08092	0.684126	3.04172	0.00235227	0.0764222
KRTAP13-4	2.78684	-5.76472	1.89691	-3.03901	0.00237359	0.0768676
UNC5CL	165.073	3.54456	1.16642	3.03884	0.00237495	0.0768676
CDC20	58.1509	2.20602	0.726386	3.03698	0.00238963	0.0771971
NDUFAF4	224.899	-1.48935	0.491293	-3.03149	0.0024335	0.0782791
TESK2	12.2218	-2.92061	0.963551	-3.03109	0.00243675	0.0782791
ITPRIPL1	3.45511	-4.49414	1.48268	-3.03108	0.00243681	0.0782791
HIF3A	15.9776	4.70726	1.55374	3.02962	0.00244858	0.0785103
LMO1	2.34589	-4.82289	1.59389	-3.02586	0.00247926	0.0793455
RPH3AL	29.4588	3.1008	1.02501	3.02513	0.00248525	0.079389
OR56A5	9.40422	-3.87787	1.28226	-3.02424	0.00249258	0.0794755
CXCL1	984.618	2.21757	0.733712	3.0224	0.00250782	0.0797394
MYOM1	13.3978	4.23736	1.40223	3.02188	0.00251209	0.0797394
CNTN4	11.3342	4.31824	1.42928	3.02126	0.00251724	0.0797394
CREB3L1	60.0943	2.96425	0.981226	3.02096	0.00251971	0.0797394
TREML2	19.5945	-2.73621	0.906018	-3.02004	0.00252739	0.0797394
DNASE1L2	8.088	4.91873	1.62878	3.01988	0.00252875	0.0797394
WDR19	23.6803	2.5046	0.829787	3.01837	0.00254142	0.0798011
SDR16C5	62.7463	3.96297	1.31298	3.0183	0.00254201	0.0798011
NGEF	56.9948	2.07034	0.686002	3.01798	0.00254467	0.0798011
HERC2P2	156.16	1.38944	0.460968	3.01417	0.00257685	0.080663
CYBASC3	79.3327	-1.44039	0.478326	-3.01132	0.00260119	0.081035
JOSD2	56.626	2.559	0.849825	3.01121	0.00260211	0.081035
AIM1L	88.5511	2.37111	0.787454	3.01111	0.00260291	0.081035
REEP1	67.9751	-3.41157	1.13336	-3.01015	0.00261119	0.0811456
TNIP1	596.623	1.23498	0.410372	3.00941	0.00261755	0.0811962
TROAP	94.2704	2.78967	0.927157	3.00885	0.0026224	0.0811998
ATG4D	25.6201	-2.89737	0.963172	-3.00816	0.00262839	0.0812386
GAS2L1	63.8196	1.57002	0.522121	3.007	0.00263839	0.0814009
ISG15	435.99	1.84113	0.612426	3.00628	0.00264465	0.0814477
LRGUK	7.86413	4.88872	1.62875	3.00151	0.00268642	0.0823055
PLCXD1	17.3657	4.23806	1.41222	3.00098	0.0026911	0.0823055
EIF1B	452.532	-1.38178	0.460459	-3.00088	0.00269197	0.0823055
OR13C3	6.59133	-5.49229	1.83058	-3.00029	0.0026972	0.0823055
MOGAT2	20.8536	5.10264	1.70083	3.00009	0.002699	0.0823055
TCF19	40.0226	2.38856	0.79628	2.99965	0.00270287	0.0823055
TNRC6C	270.429	-1.93715	0.645868	-2.99929	0.00270609	0.0823055
HES2	16.5309	5.93001	1.97839	2.99739	0.00272302	0.0826709
RIBC1	140.056	-3.38845	1.13089	-2.99626	0.00273315	0.0826709
TFAP2B	2.15934	-5.79977	1.93596	-2.99581	0.00273714	0.0826709
UNC45B	2.54536	-5.13853	1.71525	-2.99579	0.00273738	0.0826709
ANXA2	46190.4	-2.32268	0.775617	-2.99462	0.00274789	0.0827773
LOC100506013	10.0694	-3.3732	1.12661	-2.99411	0.00275245	0.0827773
OR5K3	2.58692	-4.22384	1.41131	-2.99285	0.00276389	0.0827773
DDRGK1	284.707	1.32074	0.441318	2.99271	0.00276513	0.0827773
OTOF	3.23574	-4.49444	1.50188	-2.99255	0.00276658	0.0827773
CBLB	87.3915	1.94472	0.649934	2.99219	0.00276986	0.0827773
PFKFB3	146.645	1.92523	0.644314	2.98804	0.00280776	0.0837642
C3orf58	8.49989	-2.4964	0.835834	-2.98672	0.00281988	0.0839114
FOXR1	2.02327	-5.41441	1.813	-2.98644	0.00282248	0.0839114
TMEM184C	219.171	-1.65032	0.55281	-2.98532	0.00283279	0.084001
LEMD1	13.9258	4.59104	1.53822	2.98465	0.00283903	0.084001
ZNF420	96.3642	-2.22656	0.746105	-2.98425	0.00284277	0.084001
KANSL1	105.332	1.51203	0.506714	2.984	0.00284509	0.084001
UPK1B	8.07266	-3.94834	1.32348	-2.98329	0.0028517	0.0840515
KIF12	77.6261	3.57351	1.19812	2.9826	0.00285807	0.084095
DUS2L	40.7048	2.83618	0.951216	2.98164	0.00286712	0.0841224
SHISA6	21.1299	5.42555	1.81977	2.98146	0.00286881	0.0841224
PYGB	1321.24	1.60621	0.539142	2.97919	0.0028901	0.084602
PPP1R12C	454.959	1.61378	0.542008	2.9774	0.00290701	0.0848208
PLK2	260.845	-1.93459	0.649768	-2.97736	0.00290746	0.0848208
XPNPEP1	94.3686	1.61704	0.543247	2.97661	0.00291452	0.0848824
RBM10	65.2912	2.16167	0.726811	2.97418	0.00293775	0.0852417
HORMAD1	5.35176	-3.5316	1.18756	-2.97382	0.0029412	0.0852417
VGF	12.1512	5.48897	1.84592	2.97356	0.00294364	0.0852417
LOC100506083	208.915	-3.21732	1.08216	-2.97306	0.00294849	0.0852417
CYB561D1	857.525	-2.89174	0.973051	-2.97183	0.00296031	0.0852417
AFAP1L1	59.0353	2.32021	0.78074	2.97181	0.00296052	0.0852417
MED26	7.44071	3.97068	1.33632	2.97135	0.00296491	0.0852417
ACOT7	68.0012	1.61023	0.541956	2.97114	0.00296698	0.0852417
EPHA8	9.00344	-3.66248	1.23288	-2.97066	0.00297159	0.0852417
HDAC11	69.2794	2.15983	0.727476	2.96893	0.00298838	0.0854284
RPL35A	91.3975	-2.86078	0.963746	-2.9684	0.00299358	0.0854284
B3GNT8	3.95548	-3.39605	1.14415	-2.96818	0.00299566	0.0854284
NR1H2	48.2279	2.15228	0.725175	2.96794	0.00299801	0.0854284
ADSL	137.091	2.21382	0.746364	2.96614	0.00301566	0.0855915
RPS19BP1	110.704	1.16365	0.39232	2.96608	0.00301627	0.0855915
PTGFRN	91.8278	1.77712	0.599271	2.96547	0.00302222	0.0855915
RILP	61.9239	2.67517	0.902152	2.96532	0.00302369	0.0855915
AACS	109.474	1.69806	0.573352	2.96164	0.00306008	0.0864787
SSX4B	3.28119	-4.8231	1.62923	-2.96035	0.00307289	0.0866981
BMP1	142.234	2.13537	0.721634	2.95907	0.00308565	0.0869151
SELRC1	68.9232	1.80964	0.61219	2.95601	0.00311648	0.0876394
CIDEA	14.7654	-3.52045	1.19133	-2.95505	0.00312616	0.0877678
TRIM15	432.059	1.69733	0.574676	2.95353	0.00314157	0.0880565
KRTAP12-2	31.1811	-2.68351	0.909399	-2.95087	0.00316884	0.0886757
CASP12	3.29426	-4.53168	1.53619	-2.94995	0.00317828	0.0887952
TMEM69	258.657	-1.59586	0.541282	-2.9483	0.00319523	0.0891234
KIAA0284	22.343	2.11457	0.717522	2.94704	0.00320828	0.0892107
MYO1E	258.288	1.38689	0.470613	2.947	0.00320876	0.0892107
EHBP1L1	684.083	1.54175	0.523318	2.94611	0.00321803	0.0892235
FAM96B	287.651	-0.975072	0.331044	-2.94544	0.00322492	0.0892235
PDCD2L	108.349	-1.44551	0.490867	-2.94481	0.00323156	0.0892235
LENG8	252.57	1.89736	0.644315	2.94477	0.003232	0.0892235
CCKBR	2.36548	-4.53174	1.5393	-2.94402	0.0032398	0.0892235
NIPSNAP3B	5.74792	-3.03018	1.02929	-2.94396	0.00324042	0.0892235
NSUN3	92.4057	1.23821	0.420717	2.9431	0.00324945	0.0893285
TNFAIP8L3	15.341	3.6858	1.25312	2.94129	0.00326853	0.0897094
HIST1H2AM	166.418	-1.4545	0.494674	-2.94032	0.00327877	0.0897294
GPR153	124.709	2.58506	0.879205	2.94023	0.00327972	0.0897294
P2RY8	154.048	-2.76033	0.939102	-2.93932	0.00328929	0.0898399
HIST1H4B	472.386	-1.24823	0.424733	-2.93886	0.00329423	0.0898399
IQCE	167.837	1.70105	0.578916	2.93834	0.00329973	0.0898469
BCMO1	6.23013	4.55229	1.54978	2.93737	0.00331004	0.0899848
WHAMMP3	30.0079	-2.98167	1.01537	-2.93655	0.00331887	0.0900821
LINC00163	4.82122	-5.09647	1.73626	-2.93531	0.00333211	0.0902986
RGS20	4.22667	-4.69534	1.60016	-2.93429	0.00334315	0.0903737
CA3	7.88864	4.79764	1.63515	2.93408	0.00334542	0.0903737
OSR1	10.6847	4.47375	1.5252	2.93323	0.0033546	0.0904792
GPIHBP1	9.88021	-2.75386	0.939217	-2.93208	0.003367	0.0906583
ZNF37A	148.526	-1.09666	0.374101	-2.93147	0.00337364	0.0906583
ZNF232	74.8994	-2.3516	0.80228	-2.93115	0.00337709	0.0906583
CYP2C19	12.6093	4.6868	1.60032	2.92867	0.00340413	0.0912412
GAN	45.115	2.03533	0.696053	2.9241	0.00345452	0.0924004
C21orf91	60.195	-1.6896	0.577882	-2.92378	0.00345815	0.0924004
AADAC	15.0369	5.78638	1.9804	2.92183	0.00347986	0.092836
CNIH	1184.08	-1.48553	0.508749	-2.91995	0.00350082	0.0930731
OR6X1	10.8783	-3.19408	1.0939	-2.9199	0.00350146	0.0930731
HCN4	5.44048	-5.53956	1.89754	-2.91934	0.00350778	0.0930731
PKIA	54.2889	-3.43995	1.17843	-2.9191	0.00351045	0.0930731
SOWAHD	16.5279	-2.05349	0.704055	-2.91665	0.00353808	0.0932173
CLYBL	27.7516	3.35683	1.15098	2.9165	0.00353983	0.0932173
CHST3	31.5064	3.16796	1.08623	2.91646	0.00354027	0.0932173
LDLR	264.545	1.31749	0.451784	2.91619	0.00354336	0.0932173
BMP2K	426.88	-1.44116	0.494223	-2.91601	0.00354537	0.0932173
PRAP1	731.955	3.09102	1.06012	2.91574	0.0035485	0.0932173
RPA2	121.514	-1.90924	0.655054	-2.91462	0.00356118	0.0932657
PCDHA5	6.26883	-4.71379	1.61742	-2.91438	0.00356396	0.0932657
FAM159B	3.78942	-5.5445	1.90262	-2.91414	0.00356665	0.0932657
ERV3-1	217.608	2.06295	0.708061	2.91352	0.00357377	0.0933096
SPDEF	32.5919	4.61663	1.58484	2.913	0.00357973	0.0933232
LOC100288122	3.6683	-5.48575	1.88541	-2.90958	0.00361909	0.0942063
SNORD15A	5567.56	-2.02447	0.696513	-2.90659	0.00365396	0.0947078
RNF19A	19.7096	-2.30138	0.791806	-2.90649	0.00365506	0.0947078
ZNF790	6.72764	-3.19023	1.09772	-2.90623	0.00365817	0.0947078
PKP1	10.4033	-3.13472	1.07869	-2.90603	0.00366044	0.0947078
TRIM21	116.491	-1.43969	0.495599	-2.90495	0.00367307	0.0948434
DMTF1	87.5724	1.87767	0.646439	2.90464	0.00367674	0.0948434
PRPF18	49.9308	-1.50043	0.516791	-2.90335	0.00369195	0.0950927
CXCL2	543.88	2.6644	0.917889	2.90274	0.00369912	0.0951345
CASS4	13.2607	4.19035	1.44411	2.90168	0.00371173	0.0951985
FAM83H	889.351	-2.32032	0.799672	-2.90159	0.00371271	0.0951985
DUOXA2	74.6034	4.06879	1.40293	2.9002	0.00372924	0.0954187
C19orf55	33.9192	2.89854	0.999519	2.89993	0.00373242	0.0954187
FER1L4	39.4142	2.87507	0.992183	2.89773	0.00375879	0.0957402
RNF148	9.93747	4.36491	1.50641	2.89755	0.00376087	0.0957402
TSPYL4	52.4639	1.71792	0.592903	2.89748	0.00376174	0.0957402
HIST1H2AG	120.873	-1.85809	0.641625	-2.89592	0.00378051	0.0960753
BRDT	2.59835	-5.56153	1.92116	-2.89488	0.00379308	0.0962522
CPNE1	411.597	-2.21338	0.764959	-2.89346	0.00381027	0.0964979
OR3A2	5.99944	-4.67417	1.61567	-2.89302	0.00381552	0.0964979
DDX27	295.123	1.75575	0.606961	2.89269	0.00381964	0.0964979
PSMA2	222.598	-1.74483	0.603484	-2.89127	0.0038369	0.0967915
FAM127C	681.911	-1.89984	0.65748	-2.88958	0.00385754	0.0971691
TMSB4Y	66.6652	-1.93755	0.670758	-2.8886	0.00386959	0.0973298
RAB11FIP5	67.4333	1.87559	0.649554	2.8875	0.00388318	0.0974608
ZNF181	146.293	-2.66822	0.924138	-2.88726	0.00388616	0.0974608
CCNE2	80.5975	-1.95057	0.675828	-2.88619	0.00389941	0.0976239
IGF2	4.67894	-5.71216	1.97953	-2.88561	0.00390659	0.0976239
CCDC48	10.7634	4.40014	1.52506	2.88523	0.00391133	0.0976239
LOC727677	3.22793	-4.92554	1.70735	-2.8849	0.00391543	0.0976239
ERBB2	218.765	1.94381	0.674663	2.88116	0.0039621	0.0985627
RPA3	2.43748	-5.29777	1.8389	-2.88095	0.00396479	0.0985627
MEG3	7.61157	-2.7794	0.965083	-2.87996	0.0039772	0.0985627
HAUS7	23.9953	1.82262	0.632907	2.87977	0.0039797	0.0985627
TMEM135	205.358	-1.83737	0.638065	-2.8796	0.00398181	0.0985627
ABCC6	15.5004	3.12438	1.08535	2.8787	0.00399324	0.0987032
TSPAN15	237.081	1.9016	0.661015	2.87679	0.00401737	0.0991479
PLVAP	124.166	1.70923	0.594232	2.87637	0.00402279	0.0991479
PNKD	180.945	1.42107	0.494302	2.87489	0.00404162	0.0993344
KCTD13	117.437	1.49489	0.519986	2.87487	0.00404194	0.0993344
CLSTN2	5.41046	4.35127	1.51494	2.87224	0.00407569	0.0999179
CSNK1A1L	3.97199	-4.81245	1.67558	-2.87212	0.00407733	0.0999179
PSME1	220.376	1.38331	0.481933	2.87034	0.00410035	0.0999746
RGS5	191.028	1.52751	0.532186	2.87025	0.00410146	0.0999746
FICD	28.4994	2.15129	0.749622	2.86983	0.00410696	0.0999746
CALML3	3.37121	-4.46162	1.55489	-2.86942	0.00411223	0.0999746
NCKIPSD	201.779	2.14867	0.748857	2.86927	0.00411425	0.0999746
IL26	3.28752	-3.4595	1.20572	-2.86924	0.00411461	0.0999746
GTF2A1L	5.9762	-2.74212	0.956342	-2.8673	0.00413995	0.100384
ZIK1	33.8525	-2.45819	0.857392	-2.86705	0.00414317	0.100384
GLS	769.268	-1.37761	0.480734	-2.86565	0.0041616	0.100688
LANCL3	13.6559	4.5139	1.57581	2.86449	0.00417681	0.100868
OR5AK4P	5.81272	-3.65041	1.2745	-2.86419	0.00418077	0.100868
SCARB1	239.472	1.50601	0.526387	2.86103	0.00422269	0.101452
EVI5L	32.9492	2.21035	0.772638	2.86079	0.00422592	0.101452
OR3A4P	4.4493	-4.76873	1.66695	-2.86075	0.00422639	0.101452
LOC642236	14.7455	-3.33998	1.16759	-2.86058	0.00422863	0.101452
VAV2	273.78	1.42468	0.498327	2.85892	0.00425082	0.101717
ALOX15	5.6428	-3.85443	1.3483	-2.85875	0.0042532	0.101717
CCDC11	20.8081	-2.61723	0.915619	-2.85843	0.00425746	0.101717
GOLT1B	235.767	-1.29494	0.45315	-2.85764	0.00426799	0.101826
PDPN	36.068	2.43084	0.851092	2.85614	0.00428831	0.102108
ARHGEF28	54.7997	2.49291	0.872903	2.85588	0.00429172	0.102108
TM7SF2	72.5807	-1.51114	0.529433	-2.85426	0.00431373	0.10249
HOOK2	114.416	1.26589	0.443597	2.8537	0.00432134	0.102529
LAGE3	102.483	1.5168	0.531652	2.853	0.00433092	0.102614
ZNF610	252.077	-2.78855	0.978014	-2.85124	0.00435489	0.10304
PTAFR	55.4017	-2.58433	0.907163	-2.84881	0.00438833	0.10356
NFKB2	260.532	1.40875	0.494512	2.84876	0.00438897	0.10356
OR2AT4	12.059	-4.37513	1.5362	-2.84802	0.00439918	0.103659
RNASEH2B	35.1408	-1.89588	0.665899	-2.8471	0.0044119	0.103816
QRFP	16.8756	4.75123	1.66946	2.84597	0.00442764	0.103918
PPP1R14D	58.8951	3.04942	1.07161	2.84565	0.00443209	0.103918
SPTY2D1	544.32	-1.30371	0.458211	-2.84523	0.00443795	0.103918
CREBZF	1680.31	-1.35474	0.47625	-2.84461	0.00444663	0.103918
NEK10	5.17699	-3.81664	1.34185	-2.84431	0.00445078	0.103918
LOC100505658	3.55137	-5.01118	1.76226	-2.84361	0.00446063	0.103918
TAS2R39	13.3628	2.49501	0.877445	2.84349	0.00446224	0.103918
EXOC8	98.5368	1.98284	0.697467	2.84291	0.00447038	0.103918
C17orf51	9.38682	3.42936	1.2063	2.84288	0.00447076	0.103918
ATXN7	7.35712	3.74525	1.31779	2.84206	0.00448227	0.104044
SNORA12	15072.1	-1.98355	0.698281	-2.84061	0.00450271	0.104238
CRNDE	30.5096	3.33955	1.17565	2.84061	0.00450276	0.104238
RWDD4	136.776	-1.34196	0.472528	-2.83996	0.00451188	0.104308
PAX7	9.12048	-4.26014	1.50041	-2.83933	0.0045209	0.104376
KLK3	9.12492	-3.55813	1.25379	-2.83791	0.00454096	0.104575
ADM	110.337	1.50469	0.53022	2.83786	0.00454171	0.104575
PDCD10	1208.59	-1.28715	0.453648	-2.83733	0.00454931	0.10461
GPT	27.9322	4.24737	1.49784	2.83566	0.00457308	0.104872
ARHGAP31	58.9966	2.17379	0.766638	2.83549	0.00457559	0.104872
NOG	58.9007	-3.24379	1.14424	-2.83488	0.00458425	0.104872
FRMPD2	5.81017	-3.21853	1.13548	-2.83451	0.00458956	0.104872
UMPS	120.966	-1.31012	0.462224	-2.83439	0.00459126	0.104872
TXNDC8	9.29608	-4.54809	1.60625	-2.83149	0.00463312	0.105687
CLHC1	5.88503	4.33402	1.53139	2.83011	0.00465314	0.106002
FLJ12334	8.48914	4.95587	1.75182	2.82898	0.0046696	0.106174
DYRK3	27.3541	2.64262	0.9342	2.82875	0.00467303	0.106174
TTC18	6.93478	4.58288	1.6206	2.82788	0.00468569	0.106206
LOC100506451	10.5194	3.58647	1.26831	2.82775	0.0046877	0.106206
OR9K2	13.4451	-4.2453	1.5015	-2.82738	0.00469304	0.106206
IRAK1BP1	79.5214	-1.5477	0.547568	-2.8265	0.00470599	0.106359
LRRC41	124.801	-1.70987	0.605192	-2.82534	0.00472304	0.106501
LOC728558	1.97235	-4.4072	1.55995	-2.82523	0.0047247	0.106501
TUFM	177.227	1.74505	0.617943	2.82396	0.00474343	0.106783
ZNF416	265.164	-2.83015	1.00392	-2.81911	0.00481574	0.108269
DNAJC18	82.369	-2.76876	0.982373	-2.81844	0.0048258	0.108353
CENPK	137.262	-1.91054	0.678055	-2.81768	0.00483726	0.108469
CCDC12	103.737	1.50235	0.533577	2.81561	0.00486841	0.108716
S100A9	105.665	2.47361	0.878609	2.81537	0.00487214	0.108716
STRADB	237.289	-1.27623	0.453312	-2.81535	0.00487247	0.108716
ZFAND1	999.365	-1.64922	0.585813	-2.81527	0.00487364	0.108716
SLC25A35	60.2849	-1.9597	0.696738	-2.81268	0.00491306	0.109333
HMGCL	168.996	1.39993	0.497806	2.81221	0.00492023	0.109333
TLR1	38.2782	-2.26457	0.805324	-2.81199	0.00492355	0.109333
LOC100507331	15.749	3.28563	1.16852	2.81178	0.00492678	0.109333
CPA1	3.75483	-4.0916	1.45564	-2.81086	0.00494097	0.109506
ADAM32	4.29063	-2.8083	0.999373	-2.81007	0.00495314	0.109634
ATPAF2	35.8457	2.28195	0.81232	2.80917	0.00496695	0.109798
TEX22	13.2365	-3.87777	1.38142	-2.80708	0.00499926	0.11037
BTBD2	339.837	1.59585	0.568705	2.80611	0.00501434	0.110473
SLC12A3	4.25285	-3.58775	1.27862	-2.80595	0.00501682	0.110473
LOC100507501	7.33315	-3.59398	1.28108	-2.80543	0.00502499	0.110511
OR8B3	3.03636	-5.41976	1.93297	-2.80385	0.0050496	0.11091
ABCF3	85.2539	1.48765	0.530749	2.80293	0.00506413	0.110957
TGM5	2.75142	-4.69436	1.67483	-2.80289	0.00506467	0.110957
COQ5	13.2828	-2.08734	0.744891	-2.8022	0.00507547	0.111047
KRTAP10-6	49.842	-2.66632	0.951644	-2.80181	0.00508172	0.111047
ZNF670	163.694	-1.9415	0.693273	-2.80048	0.00510271	0.111364
NOS2	208.374	3.84169	1.37295	2.79813	0.0051399	0.111932
GLCCI1	91.5966	-2.06816	0.739152	-2.79801	0.0051418	0.111932
UBE2B	388.954	-1.27767	0.45688	-2.7965	0.00516588	0.112314
STAT1	306.589	2.27755	0.815123	2.79412	0.00520406	0.112929
KIAA1109	247.769	1.45153	0.519584	2.79363	0.00521198	0.112929
SOX18	12.864	3.28539	1.17608	2.79351	0.00521391	0.112929
LRRC71	4.16413	-4.38561	1.57098	-2.79163	0.00524428	0.11304
ATE1	21.9074	2.09371	0.750013	2.79156	0.00524548	0.11304
INSRR	7.01777	-4.7525	1.7025	-2.79149	0.00524665	0.11304
ZNF662	234.823	-2.49637	0.894417	-2.79106	0.0052536	0.11304
REC8	53.3368	2.28393	0.818377	2.79081	0.00525768	0.11304
TRIM3	14.1075	-2.69632	0.966161	-2.79075	0.0052586	0.11304
OR52K1	36.2107	-2.98296	1.06922	-2.78985	0.00527317	0.113212
LOH12CR1	80.3571	1.89361	0.679027	2.78871	0.00529187	0.113375
S1PR4	41.1623	-2.93137	1.05125	-2.78846	0.00529591	0.113375
ZNF93	639.065	-2.60348	0.933758	-2.78817	0.00530059	0.113375
WNT9A	4.83619	4.18891	1.50465	2.78398	0.00536959	0.114607
INGX	5.9994	4.47406	1.60717	2.7838	0.00537257	0.114607
SNORA63	307633	-2.05707	0.739127	-2.78311	0.00538413	0.114607
ZNF385A	17.3015	2.65218	0.95302	2.78292	0.00538713	0.114607
POR	203.627	1.23747	0.444729	2.78253	0.00539372	0.114607
RNASEH2C	95.4474	1.80309	0.648069	2.78225	0.00539829	0.114607
LINC00470	2.53468	-4.82502	1.73463	-2.78158	0.00540946	0.114702
NTNG2	6.28628	4.52385	1.62699	2.7805	0.00542747	0.114942
PCCA	112.355	1.53863	0.553853	2.77805	0.00546865	0.115603
SNORA77	369.894	-2.1183	0.762571	-2.77784	0.00547218	0.115603
DDX6	1478.84	-1.54053	0.554707	-2.77719	0.00548315	0.115646
KRTAP20-3	4.57003	-4.7403	1.70704	-2.77692	0.00548771	0.115646
TOMM22	1055.82	-0.994866	0.35837	-2.77608	0.00550181	0.115797
RPL32	7933.03	-1.16113	0.418322	-2.7757	0.00550835	0.115797
DNAH14	6.59268	4.58044	1.65146	2.77358	0.00554433	0.116282
DDX17	236.581	1.49874	0.540372	2.77354	0.00554501	0.116282
AGGF1	180.12	-1.23401	0.445034	-2.77285	0.00555676	0.116387
RRN3P1	37.5589	2.17542	0.784932	2.77147	0.00558039	0.116664
TBXA2R	10.5432	4.41194	1.59212	2.77112	0.00558642	0.116664
EDF1	320.692	1.23519	0.445833	2.77052	0.00559661	0.116664
SERTAD4-AS1	41.6164	2.13955	0.772265	2.77049	0.00559719	0.116664
LOC100128714	2.05003	-5.2322	1.88965	-2.76888	0.00562496	0.1171
COL15A1	305.737	2.05762	0.743507	2.76745	0.00564971	0.117473
C10orf35	24.499	3.29195	1.18989	2.76661	0.00566421	0.11751
C9orf89	77.7656	1.87812	0.678865	2.76656	0.00566518	0.11751
KRBOX1	64.5426	-2.25647	0.81601	-2.76524	0.00568802	0.117841
NEK9	43.1736	-2.08688	0.755136	-2.76358	0.00571709	0.1183
ZNF692	360.85	1.53349	0.555123	2.76243	0.00573721	0.118464
SLC1A1	49.4582	2.16729	0.784662	2.76206	0.00574372	0.118464
ZNF512B	7.03955	3.65087	1.32185	2.76195	0.00574571	0.118464
MASP1	22.0953	5.16682	1.87106	2.76144	0.00575474	0.118508
MAP2K7	123.081	1.1732	0.424982	2.76058	0.00576985	0.118606
OR10H1	393.161	-3.37947	1.22442	-2.76005	0.00577921	0.118606
DUSP14	26.679	2.24797	0.814483	2.75999	0.00578026	0.118606
HSFX2	68.5997	-3.37473	1.22338	-2.75852	0.00580639	0.119
CCER1	12.026	-4.90429	1.77868	-2.75727	0.00582862	0.119177
ATP5I	753.286	1.68081	0.609595	2.75725	0.00582894	0.119177
SNORA70F	398.275	-2.02811	0.736082	-2.75528	0.00586418	0.119567
PARVB	120.72	-2.31986	0.841972	-2.75527	0.00586433	0.119567
MSTN	6.17132	-3.54607	1.28713	-2.75502	0.0058689	0.119567
OR2B11	29.4649	-3.04109	1.10472	-2.75281	0.00590869	0.120235
MYL6	16.129	-2.44314	0.887904	-2.75158	0.00593091	0.120544
MTRNR2L4	34.3437	-2.13008	0.774316	-2.75092	0.00594283	0.120643
LSM5	43.7687	-1.87552	0.681989	-2.75008	0.0059581	0.12081
HPX	6.03697	4.41553	1.6073	2.74717	0.00601125	0.121744
ADRA2B	5.66883	4.36025	1.58774	2.74619	0.00602913	0.121872
CCL20	326.993	2.67333	0.973519	2.74605	0.00603181	0.121872
OR8G5	4.58439	-4.63952	1.69114	-2.74343	0.0060801	0.122704
TXLNA	566.981	1.21352	0.442616	2.74169	0.00611246	0.123212
NUP210L	3.3022	-3.96029	1.44591	-2.73896	0.00616338	0.124032
FKRP	15.4017	2.69	0.982207	2.73873	0.00616763	0.124032
NKX3-2	11.8874	5.45137	1.99116	2.73779	0.00618536	0.124243
BTBD3	41.6299	2.08395	0.761309	2.73733	0.00619408	0.124273
LINC00222	2.14274	-3.96596	1.44931	-2.73645	0.00621068	0.12446
LOC286184	2.62475	-5.53477	2.02393	-2.73466	0.0062444	0.12499
ATG13	2.74136	-3.91964	1.43458	-2.73225	0.00629026	0.125713
SNORA70B	258.173	-2.05003	0.750378	-2.732	0.00629515	0.125713
FUCA2	688.503	-1.38937	0.508857	-2.73038	0.00632618	0.126185
PGK1	1053.17	2.01549	0.738653	2.7286	0.00636039	0.12672
SNORA29	276.717	-2.01044	0.737208	-2.7271	0.00638942	0.127048
MFSD3	203.117	-1.94756	0.714181	-2.72698	0.00639167	0.127048
SMIM7	768.325	-0.913731	0.335305	-2.72507	0.0064287	0.127637
ANGEL1	39.5794	2.55429	0.937567	2.72438	0.00644231	0.127759
RAD21	878.141	-1.67561	0.615331	-2.7231	0.00646729	0.128106
ZNF22	128.866	-2.43072	0.893011	-2.72193	0.00649011	0.128317
SETD4	10.5997	2.30891	0.848306	2.72179	0.00649289	0.128317
RPAP1	50.386	1.67912	0.617262	2.72027	0.00652277	0.128759
KLF9	65.3035	2.88886	1.06271	2.71839	0.00656004	0.129346
FAM181B	3.2145	-3.42799	1.26197	-2.71638	0.00660005	0.129971
TUBA1B	1770.93	-1.2824	0.472172	-2.71595	0.00660858	0.129971
HLA-B	905.951	-4.60768	1.69675	-2.71559	0.00661579	0.129971
PET112	83.965	1.84564	0.679724	2.71528	0.00662205	0.129971
SNORA39	225.736	-2.13143	0.785164	-2.71463	0.00663494	0.129977
CSF2	20.0294	3.98087	1.46652	2.7145	0.00663753	0.129977
FMO4	8.60478	3.91426	1.44247	2.71357	0.00665624	0.130195
LOXL2	392.476	1.40649	0.518481	2.71271	0.00667359	0.130245
MIA	22.2567	3.74225	1.3796	2.71256	0.00667653	0.130245
NRXN2	5.28187	4.33436	1.59803	2.71231	0.00668156	0.130245
OR13C5	6.59712	-4.06171	1.49836	-2.71078	0.00671251	0.1307
OR4K15	7.1589	-3.02824	1.11738	-2.71011	0.0067261	0.130816
REXO1L2P	271.703	-2.93613	1.08364	-2.70951	0.00673826	0.130904
ANKLE2	507.652	1.05939	0.391183	2.70817	0.00676553	0.131203
FAM21C	27.9947	2.84094	1.04912	2.70792	0.00677065	0.131203
KCNF1	7.92822	4.87717	1.80127	2.70763	0.00677659	0.131203
NEU4	6.83286	4.66866	1.7249	2.70662	0.00679714	0.131452
APOBEC2	10.7015	-3.56848	1.31907	-2.7053	0.00682426	0.131828
CBFB	417.717	-0.967123	0.357589	-2.70456	0.00683943	0.131972
BMF	65.0063	2.40553	0.890316	2.70189	0.00689472	0.13289
LEF1	320.157	-2.2092	0.818055	-2.70055	0.00692242	0.13301
FCN2	3.98322	-3.26453	1.20884	-2.70054	0.00692266	0.13301
CCDC107	46.0186	1.6761	0.620739	2.70016	0.00693053	0.13301
ZNF727	13.5889	3.50637	1.29874	2.69982	0.0069378	0.13301
PRICKLE1	4.73581	-3.43534	1.27265	-2.69935	0.00694748	0.13301
FGF16	5.65517	-3.59915	1.33344	-2.69915	0.00695159	0.13301
STAMBP	200.704	-1.22905	0.455374	-2.69898	0.00695521	0.13301
TSTD3	63.6371	-1.73647	0.643635	-2.69791	0.0069777	0.133286
OCSTAMP	6.06544	-3.68774	1.36717	-2.69735	0.00698947	0.133286
SNHG3	40.107	-2.54949	0.945242	-2.69718	0.00699297	0.133286
NR5A1	4.58118	-4.27034	1.58364	-2.69654	0.0070064	0.13331
ARIH1	181.924	-1.04187	0.386395	-2.69638	0.00700979	0.13331
LINC00482	12.8918	4.70948	1.74694	2.69585	0.00702098	0.133375
USP18	41.6623	2.52098	0.935796	2.69394	0.00706121	0.133988
GALNT6	47.3045	2.26998	0.842819	2.69332	0.00707452	0.133988
CDC45	14.6381	3.63968	1.35143	2.69321	0.00707668	0.133988
PACSIN1	6.78111	-3.56598	1.32556	-2.69016	0.0071417	0.13492
TCHP	69.0786	-1.3557	0.503988	-2.68995	0.00714622	0.13492
DNHD1	9.95474	-2.84272	1.05698	-2.68947	0.00715655	0.13492
GUK1	124.322	-2.19347	0.815659	-2.68919	0.00716249	0.13492
LRRC69	2.54513	-3.29469	1.22522	-2.68907	0.00716522	0.13492
TNC	795.615	2.83325	1.0542	2.68758	0.0071971	0.135372
IL34	8.99011	4.1057	1.52794	2.68708	0.00720806	0.135429
PTBP3	503.885	-1.27389	0.474407	-2.68522	0.00724823	0.135712
C1orf68	18.9501	-3.86456	1.43924	-2.68514	0.00724992	0.135712
KRTAP2-1	3.01439	-5.26981	1.96265	-2.68505	0.00725191	0.135712
AKAP3	13.6228	-4.07535	1.51803	-2.68464	0.00726086	0.135712
SPINT4	2.64441	-4.95813	1.84703	-2.68438	0.00726637	0.135712
ALOX12B	18.4284	-2.79928	1.04303	-2.68381	0.00727887	0.135712
PHIP	124.225	-1.42965	0.532825	-2.68316	0.00729308	0.135712
RNASE12	1.56005	-4.36077	1.62549	-2.68275	0.00730189	NA
VAX2	7.54046	-3.93504	1.46691	-2.68253	0.00730666	0.135712
ATP6V0E2	46.1801	1.83211	0.682993	2.68247	0.00730813	0.135712
SLC35G2	2.78516	-3.74009	1.39432	-2.68237	0.00731019	0.135712
GNRHR2	11.7873	2.78154	1.03703	2.68223	0.00731335	0.135712
WNT3A	2.89534	-3.87919	1.44637	-2.68201	0.00731805	0.135712
TMEM54	234.229	1.53257	0.571513	2.6816	0.00732702	0.135732
ENTPD3	10.2291	-3.32197	1.23905	-2.68106	0.00733885	0.135804
NPHP3	64.2846	2.27116	0.847226	2.6807	0.00734691	0.135807
NEXN	68.9802	2.38636	0.89068	2.67926	0.00737853	0.136245
TANC1	126.467	1.7113	0.638959	2.67827	0.00740033	0.1365
PRKCDBP	185.416	2.58805	0.966585	2.67752	0.00741687	0.136588
RSPH6A	13.435	-3.85688	1.44056	-2.67734	0.00742099	0.136588
NKRF	3.26549	-4.44449	1.6613	-2.6753	0.00746616	0.137272
LINC00158	1.84752	-5.14374	1.92307	-2.67475	0.00747853	0.137352
LINC00593	12.276	-3.83151	1.43414	-2.67165	0.00754801	0.138389
KRTAP10-1	32.048	-3.46384	1.29672	-2.67123	0.00755728	0.138389
ELOVL7	64.7667	-1.66362	0.622812	-2.67115	0.00755919	0.138389
SNORA21	113399	-2.75082	1.0307	-2.66887	0.00761065	0.139182
LOC150622	1.75181	-5.04361	1.89096	-2.66723	0.00764797	0.139716
MPRIP	854.954	1.10945	0.416126	2.66614	0.00767275	0.139949
TST	360.004	1.80663	0.677668	2.66595	0.00767702	0.139949
NBPF1	38.032	1.90901	0.716257	2.66526	0.00769279	0.140087
SYT7	239.204	2.16931	0.814355	2.66384	0.00772534	0.140531
JPH2	11.6668	3.73125	1.40133	2.66265	0.00775291	0.140701
RP9P	102.002	-1.32413	0.497303	-2.66262	0.00775359	0.140701
OR5F1	3.04997	-4.93214	1.85254	-2.66237	0.00775929	0.140701
LOC100505876	25.7828	-2.05128	0.770596	-2.66194	0.0077692	0.140732
PP7080	6.20358	3.51168	1.31965	2.66106	0.00778943	0.140949
PCDHGA9	11.3428	-2.24564	0.844158	-2.66021	0.00780922	0.141159
CSNK1E	517.834	1.15169	0.433361	2.65759	0.00787026	0.142112
PSMA3	44.4737	-1.26281	0.475238	-2.65722	0.00787882	0.142117
DSCR10	13.6084	-3.83746	1.44454	-2.65653	0.00789483	0.142185
GAR1	14.0193	2.42932	0.914535	2.65635	0.00789916	0.142185
ZNF23	290.687	-2.08388	0.784726	-2.65555	0.00791782	0.142371
CALML5	10.9495	-3.26747	1.23113	-2.65405	0.0079532	0.142858
C19orf73	42.8502	-1.84284	0.694744	-2.65255	0.00798866	0.143224
TMEM14B	129.768	-1.55351	0.585682	-2.65248	0.00799029	0.143224
CD84	54.1726	2.59446	0.978507	2.65144	0.00801484	0.143514
RNF207	56.3416	2.72314	1.02738	2.65057	0.00803559	0.143725
PFDN2	1226.19	-1.22301	0.461584	-2.6496	0.00805881	0.143725
XPOT	477.715	-1.27099	0.479706	-2.64952	0.00806053	0.143725
STOM	277.5	2.42507	0.915338	2.64937	0.00806414	0.143725
STK32C	27.3077	3.76151	1.41987	2.64919	0.0080685	0.143725
ZNF281	25.3861	2.50565	0.946758	2.64656	0.00813157	0.144559
HHLA2	50.8148	2.74969	1.03898	2.64653	0.00813216	0.144559
STK33	19.9707	-2.99811	1.13453	-2.64261	0.00822704	0.145981
MRPS15	123.651	1.93607	0.732749	2.64219	0.00823708	0.145981
NDUFS8	267.477	0.917038	0.347114	2.64189	0.00824446	0.145981
GPR116	32.8823	2.06835	0.782973	2.64166	0.00825014	0.145981
ANKRD11	108.441	1.23056	0.465876	2.64138	0.00825689	0.145981
SLCO2A1	183.771	2.21868	0.840129	2.64088	0.00826901	0.145981
PRAMEF6	1.71441	-4.66218	1.76546	-2.64077	0.00827176	0.145981
AATK	26.9284	3.04778	1.15475	2.63935	0.00830648	0.146443
FAM86FP	29.2062	-2.79216	1.05816	-2.63869	0.00832263	0.146577
ALKBH1	100.497	2.61157	0.98997	2.63803	0.00833886	0.146628
SRGAP1	31.6858	2.11889	0.803256	2.63788	0.00834261	0.146628
NME9	32.3391	-3.42986	1.30071	-2.63691	0.00836642	0.146891
RARG	70.3669	1.32771	0.503574	2.63658	0.00837469	0.146891
UBE2QL1	5.0064	4.24048	1.60938	2.63486	0.00841726	0.147176
FHOD1	65.1914	1.95804	0.743146	2.6348	0.00841876	0.147176
SPOCK1	110.847	2.85261	1.08272	2.63466	0.00842205	0.147176
F8	9.3403	-2.43113	0.923124	-2.63359	0.00844875	0.147176
HNRNPH2	54.1315	1.87848	0.713281	2.63358	0.00844909	0.147176
PLCD1	52.8865	2.19165	0.832251	2.6334	0.00845355	0.147176
ASAH2B	51.1483	-1.44963	0.550524	-2.63319	0.0084588	0.147176
CKLF	6.14742	-2.95691	1.12295	-2.63316	0.00845956	0.147176
RAD23B	1010.39	-1.29361	0.491629	-2.63127	0.00850662	0.147707
AURKAIP1	421.206	1.45787	0.554072	2.63119	0.00850865	0.147707
SCP2D1	37.2833	-3.15592	1.19956	-2.6309	0.00851593	0.147707
RNASE8	19.7576	-3.14928	1.19746	-2.62997	0.00853919	0.147961
OBP2A	13.9415	4.48533	1.70602	2.62913	0.00856042	0.148179
ZFP30	75.8269	-2.06398	0.785754	-2.62675	0.00862054	0.149069
DEF8	7.91442	-2.11197	0.804146	-2.62636	0.00863047	0.149091
SERPINB6	525.766	-1.28601	0.489775	-2.62571	0.00864677	0.149222
LINC00466	6.00307	-2.89561	1.10298	-2.62526	0.00865822	0.149269
ZNF568	13.5906	3.48468	1.32758	2.62484	0.00866899	0.149305
KRT79	4.05445	-5.17871	1.97339	-2.62427	0.00868337	0.14931
LDHB	1772.39	-1.71293	0.652763	-2.62413	0.0086871	0.14931
ACTL6A	135.582	-1.24169	0.473253	-2.62374	0.00869712	0.14931
F5	4.44101	4.06156	1.54817	2.62346	0.00870407	0.14931
GLT1D1	5.98744	3.60397	1.37445	2.62211	0.00873871	0.149465
RNF40	328.824	1.23828	0.472249	2.6221	0.00873906	0.149465
CXorf66	9.8888	-3.47417	1.32496	-2.62209	0.00873927	0.149465
SOX14	15.8439	-3.63962	1.38865	-2.62097	0.00876803	0.149808
POM121L4P	10.195	-2.54014	0.969606	-2.61977	0.00879888	0.15009
ZNF331	77.1335	-2.91776	1.1138	-2.61965	0.00880207	0.15009
UGT2B11	12.0358	-3.58834	1.37032	-2.61862	0.00882857	0.150311
ZNF680	162.732	-1.52477	0.582378	-2.61819	0.00883987	0.150311
SLC35B1	384.454	-1.0273	0.392379	-2.61813	0.00884129	0.150311
RNF121	85.9014	1.39369	0.532405	2.61772	0.00885193	0.150343
GRIN2B	13.9675	3.5789	1.36757	2.61697	0.00887146	0.150354
LAYN	29.3574	2.53828	0.970115	2.61647	0.00888435	0.150354
SOX9	160.874	1.6713	0.638807	2.61628	0.00888926	0.150354
EEF1G	6114.85	-0.964867	0.368809	-2.61617	0.00889229	0.150354
GOLGA3	226.117	1.34657	0.514742	2.61601	0.00889643	0.150354
MCOLN2	13.6074	-1.94626	0.744204	-2.61523	0.00891674	0.150427
CEP95	5.09111	-2.43916	0.932696	-2.61517	0.00891829	0.150427
TNFRSF11B	26.3206	1.91514	0.732422	2.61481	0.00892777	0.150439
TIMM8A	67.9164	1.59213	0.609067	2.61404	0.00894784	0.150557
ZNHIT2	161.125	-1.82683	0.698899	-2.61387	0.0089523	0.150557
STARD13	121.95	1.52769	0.584586	2.61329	0.00896748	0.150664
SORT1	297.807	1.62913	0.62365	2.61226	0.00899466	0.150973
SC5DL	41.754	-1.4791	0.566452	-2.61117	0.0090232	0.151304
PRPF40B	64.5158	2.20631	0.845457	2.6096	0.00906474	0.15181
DOCK6	327.77	1.60346	0.614553	2.60915	0.00907679	0.15181
ALDH1L2	32.6191	1.67972	0.643881	2.60874	0.00908756	0.15181
GLI1	3.25859	-2.82669	1.08356	-2.6087	0.00908878	0.15181
RRAGA	133.222	1.26667	0.485954	2.60656	0.00914562	0.152611
TMPRSS2	405.378	1.50354	0.576957	2.60598	0.0091611	0.152721
ATP5J	44.7394	-1.65049	0.633739	-2.60438	0.00920418	0.15329
ZNF85	49.1142	-1.86762	0.717601	-2.60259	0.00925229	0.153443
PPP4R1	194.855	-1.19013	0.457308	-2.60248	0.00925529	0.153443
ZAN	3.3378	-4.57803	1.75934	-2.60213	0.00926458	0.153443
ERH	1312.79	-1.13197	0.435031	-2.60205	0.00926684	0.153443
FAM66C	319.436	-2.36889	0.910433	-2.60194	0.00926975	0.153443
GALNS	107.86	1.8385	0.706632	2.60178	0.00927415	0.153443
SLC51B	34.2521	4.85809	1.86727	2.60171	0.00927598	0.153443
UBE2MP1	2.05698	-5.32739	2.04803	-2.60122	0.00928922	0.153514
DTX4	108.777	1.60711	0.617969	2.60064	0.00930505	0.153627
TBC1D20	365.152	1.04662	0.402533	2.60009	0.00931998	0.153726
CAPN9	10.1501	5.21915	2.00772	2.59954	0.00933483	0.153797
ERCC3	83.8894	1.71827	0.661061	2.59926	0.00934262	0.153797
HS1BP3	140.681	1.17454	0.451945	2.59887	0.00935324	0.153797
P2RY4	32.0342	-2.01936	0.777127	-2.5985	0.00936322	0.153797
MAP3K2	222.215	-0.883054	0.33986	-2.59828	0.0093691	0.153797
VDR	384.208	1.45536	0.560313	2.59741	0.00939286	0.153941
TMOD1	4.12205	3.96243	1.52573	2.59707	0.00940227	0.153941
OR7C2	2.52909	-4.54633	1.75062	-2.59698	0.00940478	0.153941
CCL7	23.6623	-2.59541	0.999585	-2.59649	0.00941811	0.154012
FAM129C	3.39733	-4.70632	1.81316	-2.59565	0.00944119	0.15407
ZNF189	40.7172	-2.09122	0.805739	-2.5954	0.009448	0.15407
FAM194B	23.7444	-3.75101	1.44533	-2.59526	0.00945206	0.15407
KRT15	16.5095	3.21738	1.2399	2.59487	0.00946257	0.15407
AARS2	114.49	1.75039	0.674595	2.59473	0.00946658	0.15407
PLAC9	54.5206	-2.62084	1.01061	-2.59332	0.00950535	0.154554
TRMT1	216.955	1.53493	0.592036	2.59264	0.00952425	0.154567
GNA14	14.4034	2.92259	1.1274	2.59233	0.0095327	0.154567
MTRR	75.3488	-1.40451	0.541798	-2.59232	0.00953317	0.154567
AQP7	327.184	-3.16313	1.22073	-2.59118	0.00956466	0.154931
FBXW8	24.2321	2.08666	0.805775	2.58963	0.00960788	0.155484
LIPN	4.56684	4.09076	1.57997	2.58914	0.00962168	0.155561
FSCN1	112.005	1.65763	0.640738	2.58707	0.00967957	0.156098
DDX60	107.991	1.75999	0.680368	2.58682	0.00968666	0.156098
GNPNAT1	1099.8	-1.54694	0.598041	-2.58668	0.00969057	0.156098
SNORA84	12188	-2.10593	0.814152	-2.58665	0.00969131	0.156098
UPF3B	184.441	1.70795	0.660655	2.58523	0.00973137	0.156597
NFKBIE	23.9595	2.10548	0.814675	2.58444	0.00975362	0.156807
RASAL2	39.1718	1.89621	0.733846	2.58393	0.00976816	0.156894
PARK7	823.111	-1.02921	0.398965	-2.5797	0.00988871	0.158582
AQP3	34.3171	-2.46404	0.955207	-2.57959	0.00989174	0.158582
GDI1	226.201	1.07311	0.416332	2.57753	0.00995098	0.159084
MRPS18C	298.746	-1.28519	0.49867	-2.57724	0.00995927	0.159084
MEAF6	384.189	1.15051	0.446452	2.57702	0.00996567	0.159084
MRGBP	135.585	1.32494	0.514157	2.57691	0.0099688	0.159084
ZC3HAV1L	22.0918	2.39988	0.931381	2.57668	0.00997531	0.159084
OTUD3	44.0174	1.76114	0.683521	2.57657	0.0099787	0.159084
MIR3907	4.97588	-3.49735	1.35765	-2.57604	0.00999382	0.159177
FAM134C	254.696	1.20194	0.466688	2.57546	0.0100106	0.1592
SLITRK1	5.23025	-3.98149	1.546	-2.57535	0.0100138	0.1592
KIAA1549	28.1604	2.38064	0.924788	2.57426	0.0100456	0.159557
NIPA1	35.193	1.6003	0.621768	2.57379	0.0100592	0.159626
MEMO1	674.979	-1.22303	0.475294	-2.57321	0.0100761	0.159721
OR5R1	2.47737	-5.81919	2.26188	-2.57273	0.01009	0.159721
PGAM2	23.7741	-2.30746	0.896929	-2.57262	0.0100931	0.159721
MRPS18B	348.514	-1.18051	0.459081	-2.57147	0.0101267	0.160105
LENEP	5.60598	-2.86356	1.11384	-2.57089	0.0101437	0.160226
KRT6B	30.2962	4.37343	1.70155	2.57026	0.0101622	0.160371
YIPF7	39.2973	-3.14794	1.22493	-2.5699	0.0101727	0.160388
SCN4A	4.01872	-3.79413	1.47702	-2.56877	0.010206	0.160431
CCR8	21.7236	2.19231	0.853537	2.5685	0.0102139	0.160431
SCAMP1	69.5616	-1.56946	0.611107	-2.56823	0.0102219	0.160431
LOC148413	35.9088	-1.85326	0.721664	-2.56804	0.0102277	0.160431
SNORA24	94221.3	-2.25681	0.878873	-2.56785	0.0102332	0.160431
DNAH10	4.79154	-3.1381	1.22223	-2.56752	0.0102429	0.160431
EIF4A3	118.428	1.62879	0.634425	2.56734	0.0102481	0.160431
METTL17	41.0758	1.87065	0.728653	2.56727	0.0102502	0.160431
ATP13A3	222.482	-1.46419	0.570453	-2.56672	0.0102665	0.16054
COL4A3	4.57344	-4.3245	1.68539	-2.56588	0.0102916	0.160785
SMIM5	66.2939	2.92316	1.1396	2.56508	0.0103153	0.160987
YY2	25.4387	3.08484	1.20288	2.56454	0.0103312	0.160987
NFASC	6.01201	3.58936	1.39964	2.56449	0.0103326	0.160987
LOC100130872	23.1483	2.79467	1.09001	2.5639	0.0103504	0.161116
EIF3L	2264.42	-1.47355	0.574982	-2.56277	0.010384	0.161403
CYTH2	404.277	1.61038	0.628417	2.5626	0.0103891	0.161403
SPOCD1	14.6836	4.02414	1.57049	2.56234	0.010397	0.161403
OR4F5	2.96916	-4.37255	1.70786	-2.56026	0.0104594	0.162225
FAAH	27.0765	2.61616	1.02213	2.55951	0.010482	0.162305
MAMSTR	12.2561	5.44115	2.1259	2.55946	0.0104835	0.162305
L3MBTL4	66.8892	-2.23098	0.871803	-2.55904	0.0104963	0.162356
ARTN	7.8236	-2.97324	1.16221	-2.55827	0.0105196	0.16257
FXR2	164.487	1.47093	0.575086	2.55776	0.010535	0.162662
CYP2C18	17.2797	3.82142	1.49472	2.55661	0.0105698	0.162984
KRT80	142.859	0.96649	0.378061	2.55644	0.0105749	0.162984
MFN2	247.929	1.50885	0.590649	2.55457	0.010632	0.163718
TMEM105	4.78515	-3.27532	1.28254	-2.55378	0.0106561	0.163942
IRGC	1.58867	-4.27166	1.67342	-2.55265	0.0106907	NA
RND3	197.424	1.60288	0.627978	2.55245	0.0106967	0.164419
HIATL2	10.467	-2.6113	1.02323	-2.55201	0.0107103	0.164481
PRPF6	102.167	1.68139	0.658998	2.55144	0.0107278	0.164587
SCG5	111.6	2.61316	1.0243	2.55116	0.0107365	0.164587
AMELX	10.0737	-3.57448	1.40158	-2.55031	0.0107626	0.164587
UTS2R	17.3592	-2.48436	0.974139	-2.55031	0.0107627	0.164587
APPL1	200.165	-1.44148	0.565237	-2.55023	0.0107652	0.164587
EIF2AK4	270.922	-1.16752	0.457867	-2.54992	0.0107748	0.164587
TRANK1	34.0079	1.95977	0.768944	2.54865	0.010814	0.164853
ZNF273	89.8038	-1.64881	0.646967	-2.54853	0.0108179	0.164853
TUBG1	237.681	1.41582	0.555581	2.54835	0.0108233	0.164853
EIF1AD	13.0967	3.35543	1.31699	2.5478	0.0108405	0.164853
IFFO1	14.7035	2.31624	0.90915	2.5477	0.0108437	0.164853
CCL13	86.5526	-2.32594	0.913029	-2.5475	0.0108499	0.164853
COX19	184.053	-1.28531	0.504611	-2.54714	0.010861	0.164865
SPON2	106.568	2.06391	0.810375	2.54685	0.0108699	0.164865
NUP210P1	12.6537	-3.62719	1.42453	-2.54623	0.0108892	0.165012
CHI3L1	359.577	3.09135	1.21436	2.54565	0.0109074	0.165142
GRID1	4.82626	4.13993	1.62679	2.54485	0.0109325	0.165376
RPA4	15.3807	3.62581	1.42505	2.54434	0.0109485	0.165471
SNORA70	256031	-2.11139	0.829987	-2.54388	0.0109628	0.165543
PLCG1	467.592	1.61521	0.635033	2.5435	0.0109747	0.165575
VENTX	6.00882	-2.55958	1.00668	-2.5426	0.011003	0.165856
ACSF3	69.9795	1.65544	0.65116	2.54229	0.0110128	0.165859
NMBR	48.7921	-3.49294	1.37419	-2.54183	0.0110275	0.165934
PECR	38.6905	-1.9998	0.787324	-2.53999	0.0110856	0.166455
LOC150185	7.06908	-3.17131	1.24875	-2.53959	0.0110982	0.166455
LOC100506688	9.93216	-2.91028	1.14604	-2.53941	0.0111039	0.166455
IFNW1	5.89106	-3.65321	1.43867	-2.53929	0.0111078	0.166455
RAX	1.61906	-5.00569	1.97145	-2.53909	0.011114	NA
RASAL3	68.3678	-2.15516	0.848804	-2.53905	0.0111154	0.166455
CXorf28	9.85344	-3.43969	1.3548	-2.5389	0.0111203	0.166455
ALPP	3.89664	-3.09447	1.21906	-2.53842	0.0111355	0.166537
ALDOB	61.3106	3.10314	1.2231	2.53711	0.0111771	0.166698
OR52N4	26.337	-3.71258	1.46335	-2.53704	0.0111796	0.166698
C6orf141	65.3892	2.23947	0.882762	2.53688	0.0111844	0.166698
DFFB	179.547	-2.45871	0.969294	-2.5366	0.0111935	0.166698
TMEM187	18.1501	2.21285	0.872488	2.53626	0.0112045	0.166698
SLC25A10	44.1029	-1.63725	0.645537	-2.53625	0.0112046	0.166698
GABPB1	95.7287	-0.883247	0.348299	-2.53588	0.0112164	0.166729
GNG8	3.25027	-3.75067	1.47945	-2.53518	0.011239	0.166921
PLXNA3	348.102	1.79649	0.709003	2.53383	0.0112823	0.167419
LILRB3	36.6894	2.6736	1.05563	2.53271	0.0113183	0.167808
LOC255167	4.14968	-3.76744	1.48809	-2.53173	0.0113502	0.168136
RUFY3	46.9771	1.72569	0.682093	2.52999	0.0114067	0.168789
CCDC93	114.182	1.54849	0.612131	2.52967	0.0114171	0.168789
DSC3	37.1204	4.25905	1.6839	2.52928	0.0114296	0.168789
KIAA1456	17.5703	-2.19525	0.867979	-2.52916	0.0114337	0.168789
PAX6	8.20198	4.94084	1.95416	2.52837	0.0114593	0.169022
OLFML2A	43.9421	2.43882	0.965222	2.5267	0.0115141	0.169685
PPP5C	130.921	1.8714	0.741031	2.52539	0.0115569	0.17009
ST3GAL5	27.1977	-2.39286	0.947674	-2.52498	0.0115705	0.17009
RDH10	117.475	-1.46501	0.580213	-2.52495	0.0115714	0.17009
PPIL2	61.8737	1.60985	0.637869	2.5238	0.0116094	0.170502
SNAI2	30.3808	2.41695	0.957987	2.52294	0.0116377	0.170718
PCDHA9	1.82586	-5.87717	2.33004	-2.52235	0.0116574	0.170718
C8G	15.473	-2.40116	0.951962	-2.52232	0.0116582	0.170718
TOMM7	2893.65	-1.1678	0.463054	-2.52194	0.0116709	0.170718
TCP11L2	93.3368	1.48361	0.588427	2.52131	0.0116918	0.170718
SDK2	16.6529	2.72312	1.08017	2.521	0.011702	0.170718
ZNF558	96.6657	-1.88876	0.749219	-2.52098	0.011703	0.170718
AFP	2.15445	-4.83737	1.91894	-2.52086	0.0117069	0.170718
PIWIL1	27.8045	3.64667	1.44671	2.52066	0.0117136	0.170718
TUFT1	93.1264	1.83715	0.728989	2.52013	0.0117312	0.170829
PLA2G2C	2.12311	-5.00875	1.98778	-2.51977	0.011743	0.170857
DLG5	408.308	1.77966	0.706414	2.51929	0.0117593	0.170948
CORO1B	313.346	1.19722	0.475298	2.51888	0.0117727	0.170999
FAM83F	56.7709	1.5881	0.630811	2.51756	0.0118172	0.171348
CHP2	7.23838	4.76211	1.89166	2.51743	0.0118215	0.171348
CCDC3	73.6638	2.10676	0.836922	2.51727	0.0118268	0.171348
ATP6V1G3	5.07312	-3.96955	1.57714	-2.51693	0.0118383	0.171371
SLC26A4-AS1	5.14352	-3.68216	1.46373	-2.51561	0.0118827	0.171869
HOXC13	7.27151	-3.31969	1.32015	-2.51463	0.0119159	0.172203
HIST1H1T	5.43857	-3.27991	1.30519	-2.51298	0.0119716	0.172618
LOC100499489	14.7883	-2.64347	1.05211	-2.51255	0.0119862	0.172618
SLC29A3	22.804	2.15421	0.85739	2.51252	0.0119871	0.172618
LINC00273	19.2726	-3.44538	1.37129	-2.51251	0.0119876	0.172618
PATE3	9.29379	-3.58068	1.4253	-2.51223	0.0119971	0.172618
ZNF738	22.6508	-2.23683	0.89046	-2.512	0.012005	0.172618
NDRG4	8.6533	3.84222	1.52997	2.51131	0.0120283	0.172808
ZNF304	174.784	-2.25058	0.8966	-2.51013	0.0120686	0.173243
PRKRIR	704.332	-1.5327	0.610731	-2.50962	0.0120862	0.173351
FBN2	13.377	3.40806	1.35896	2.50784	0.012147	0.174077
CCDC68	92.6397	2.07106	0.826025	2.50727	0.0121669	0.174216
BPIFA1	4.86897	-3.35566	1.33885	-2.50637	0.012198	0.174515
TRIM44	910.593	-1.33251	0.53176	-2.50585	0.0122159	0.174626
ADCY10P1	10.7567	-3.15743	1.26042	-2.50507	0.0122428	0.174721
FOXP4	94.8645	1.50041	0.598951	2.50507	0.0122429	0.174721
ANO5	39.8227	3.43389	1.37105	2.50458	0.0122597	0.174795
LOC219731	5.23535	-2.52614	1.00871	-2.50433	0.0122684	0.174795
LOC731223	4.87781	-3.20002	1.278	-2.50392	0.0122827	0.174852
DDT	687.401	-1.31643	0.525844	-2.50346	0.0122987	0.174935
HMG20B	202.386	1.28326	0.512922	2.50186	0.0123542	0.175456
ULBP1	9.14481	-2.38052	0.951594	-2.50162	0.0123627	0.175456
PALLD	24.72	-2.86076	1.14361	-2.50152	0.012366	0.175456
HUS1B	9.73411	3.07835	1.23139	2.49991	0.0124225	0.175831
NMUR1	5.43741	-3.0029	1.20124	-2.49983	0.0124253	0.175831
LOC148709	5.07634	-3.00766	1.20321	-2.49969	0.0124301	0.175831
USP34	111.654	-1.28653	0.514696	-2.4996	0.0124334	0.175831
GLA	85.9568	1.70432	0.681951	2.49918	0.012448	0.175891
TRIM49C	1.65281	-4.95037	1.98168	-2.49807	0.0124872	0.176301
EPHA1	202.129	1.70176	0.681358	2.4976	0.0125038	0.176344
FAM18B2	66.5075	1.48964	0.596623	2.49678	0.0125325	0.176344
IFT80	57.0871	1.84178	0.737678	2.49673	0.0125344	0.176344
SPHK2	6.57682	4.48577	1.79678	2.49656	0.0125405	0.176344
SPRR2D	49.5985	-3.56014	1.42618	-2.49628	0.0125503	0.176344
FAM40B	47.7634	2.06616	0.82771	2.49623	0.012552	0.176344
TDRD6	6.61819	4.46037	1.78731	2.49557	0.0125754	0.176529
LINC00574	16.5207	-3.12895	1.25425	-2.49469	0.0126069	0.17664
MED24	209.57	1.49096	0.597695	2.49452	0.0126126	0.17664
EPAS1	51.6125	1.95148	0.782319	2.49448	0.0126142	0.17664
ZNF761	17.6734	-1.83433	0.735605	-2.49364	0.012644	0.176818
OR3A1	15.3922	-3.21165	1.28799	-2.49354	0.0126475	0.176818
PPCDC	31.725	1.25692	0.504179	2.49301	0.0126666	0.176941
OR4C6	4.92888	-4.23745	1.70062	-2.49171	0.0127131	0.177445
BOLA2B	453.228	1.29407	0.519583	2.49059	0.012753	0.177685
ALDOA	58.1989	-1.66312	0.66786	-2.49022	0.0127664	0.177685
LOC146481	2.10105	-4.46618	1.79349	-2.49022	0.0127665	0.177685
ESRRG	3.17862	-4.78651	1.92225	-2.49005	0.0127726	0.177685
CEP41	49.5993	2.1647	0.869522	2.48952	0.0127915	0.177685
RPL31P11	18.6594	-2.92107	1.17336	-2.4895	0.0127924	0.177685
EFR3B	13.3592	2.87731	1.15594	2.48914	0.0128052	0.177718
STK40	157.781	1.65371	0.664679	2.48798	0.0128469	0.178029
SYNCRIP	879.635	-1.09866	0.441592	-2.48795	0.0128483	0.178029
SNORA2A	874.221	-1.80147	0.724359	-2.48699	0.012883	0.178366
ARF4	1124.6	-1.07432	0.432057	-2.48652	0.0128998	0.178455
TMEM184B	180.51	1.15566	0.464838	2.48615	0.0129135	0.178488
ZNF736	322.823	-2.21263	0.890098	-2.48582	0.0129252	0.178488
COX6B2	11.2397	4.47615	1.80084	2.4856	0.0129335	0.178488
NUDT19	158.909	-1.34713	0.542136	-2.48485	0.0129605	0.178577
POLE2	8.23347	3.53758	1.42372	2.48474	0.0129645	0.178577
SHC1	804.335	1.04067	0.418855	2.48456	0.0129711	0.178577
NDNF	17.4644	4.26833	1.7184	2.48389	0.0129955	0.178602
ZNF484	12.308	-1.76843	0.71197	-2.48385	0.0129971	0.178602
FAM83B	106.766	-1.59617	0.64267	-2.48365	0.0130042	0.178602
NSG1	8.06411	4.02165	1.62004	2.48245	0.0130483	0.179065
CD48	124.569	-2.3543	0.948676	-2.48166	0.013077	0.179182
LCN2	12365.2	2.69836	1.08733	2.48164	0.0130778	0.179182
SPATC1	6.48042	3.75854	1.51482	2.48118	0.0130949	0.179187
NFE2L1	165.802	1.04678	0.421926	2.48096	0.0131028	0.179187
OR1L8	7.8503	-2.68183	1.08116	-2.48052	0.0131191	0.179187
CYP2U1	24.6908	2.36075	0.951726	2.4805	0.0131199	0.179187
MAGEB16	1.93658	-4.56786	1.84237	-2.47934	0.0131624	0.179625
BLOC1S6	377.705	-1.23115	0.496705	-2.47864	0.0131883	0.179664
BAALC	4.60656	-2.79798	1.12893	-2.47845	0.0131956	0.179664
TMEM170A	177.604	-1.14485	0.46197	-2.47819	0.0132051	0.179664
RNF212	10.3213	4.11241	1.65948	2.47813	0.0132072	0.179664
CSE1L	918.63	-1.30686	0.527586	-2.47705	0.0132473	0.180067
LOC284276	1.39615	-4.44831	1.79612	-2.47662	0.0132634	NA
LCE1A	3.02946	-4.58028	1.85006	-2.47574	0.0132959	0.180518
ESR2	3.78826	-3.25333	1.31422	-2.47548	0.0133056	0.180518
KRTAP19-3	2.81113	-3.85533	1.55751	-2.47531	0.013312	0.180518
DLG4	39.6295	1.5836	0.639844	2.47497	0.0133247	0.180546
KLF3	295.482	1.72195	0.695986	2.47411	0.0133569	0.180841
LOC729678	9.42671	-2.87145	1.16104	-2.47318	0.0133918	0.18117
PHF2	29.0846	2.1871	0.884933	2.47148	0.0134554	0.181887
SLC22A23	50.2176	2.4192	0.979281	2.47039	0.0134967	0.182018
DIRAS3	18.0889	-2.74556	1.11145	-2.47026	0.0135017	0.182018
C22orf39	402.328	-3.25389	1.31726	-2.4702	0.0135037	0.182018
TNNI2	3.93226	3.94307	1.59632	2.4701	0.0135075	0.182018
LRRC47	212.872	1.49978	0.607314	2.46953	0.0135292	0.182167
SVIP	165.845	-1.60072	0.648314	-2.46904	0.0135474	0.182269
ADCY10	3.61351	-4.43892	1.79894	-2.46752	0.0136054	0.182905
SNORA55	4572.4	-2.27487	0.922137	-2.46695	0.0136268	0.18305
DNAJC28	4.82947	4.14801	1.68175	2.46649	0.0136444	0.183142
RPLP1	38855.9	-1.11009	0.450254	-2.46548	0.0136828	0.183515
C22orf13	259.476	1.01981	0.41376	2.46474	0.0137112	0.183579
C5orf15	213.72	1.8241	0.74015	2.46449	0.0137208	0.183579
TCF4	56.2755	1.75947	0.713949	2.46442	0.0137235	0.183579
MAGEA2	67.0964	-2.85715	1.15962	-2.46386	0.0137451	0.183579
OR9Q1	3.03999	-4.85009	1.9686	-2.46372	0.0137503	0.183579
TMCC3	31.3273	3.00632	1.22026	2.46368	0.0137518	0.183579
ZNF433	73.2675	-1.7519	0.711493	-2.46228	0.0138056	0.184037
ARRB1	56.2932	1.4971	0.608108	2.4619	0.0138202	0.184037
RPS27L	15.1179	-1.70013	0.690632	-2.46171	0.0138278	0.184037
WBP4	144.613	-1.50514	0.611532	-2.46126	0.0138451	0.184037
SNORA59A	110.704	-1.73007	0.702922	-2.46125	0.0138455	0.184037
SLC16A13	67.5524	-1.42636	0.579556	-2.46112	0.0138505	0.184037
ELK1	62.5664	1.38022	0.560978	2.46039	0.0138788	0.18427
PIF1	11.0542	-2.115	0.859993	-2.45932	0.0139201	0.184675
OR52M1	3.0122	-5.30668	2.15838	-2.45864	0.0139463	0.184881
PDX1	31.4618	2.43719	0.991776	2.4574	0.0139945	0.185247
ASNSD1	103.368	-1.37505	0.559558	-2.45738	0.0139955	0.185247
CCDC126	43.8416	-1.74985	0.71299	-2.45424	0.0141182	0.186578
DEXI	19.7907	-1.5977	0.651	-2.45422	0.0141191	0.186578
CYP2W1	59.7977	3.85607	1.57145	2.45382	0.0141348	0.186578
RPL13	786.373	-1.47566	0.601504	-2.45328	0.014156	0.186578
ZNF300P1	5.18909	3.22692	1.31539	2.4532	0.014159	0.186578
CSNK1G3	5.78103	-3.51281	1.43205	-2.45299	0.0141675	0.186578
PARL	57.717	-1.53195	0.624555	-2.45287	0.0141723	0.186578
LOC284788	2.23876	-4.48614	1.82951	-2.4521	0.0142025	0.186755
LINC00346	6.03123	3.43789	1.40209	2.45197	0.0142075	0.186755
ZNF652	163.725	1.20171	0.490241	2.45126	0.0142356	0.186981
ETV4	330.492	1.48896	0.60758	2.45064	0.0142604	0.187024
SNORA2B	1323.28	-2.24343	0.915472	-2.45058	0.0142627	0.187024
LOC286442	3.75914	-3.51632	1.43503	-2.45035	0.0142716	0.187024
PLAUR	783.142	1.32512	0.540878	2.44995	0.0142878	0.187093
BLID	22.9113	-1.80334	0.736221	-2.44945	0.0143074	0.187208
GTF2H2C	3.80697	-2.59627	1.06019	-2.44888	0.0143301	0.187304
PLA2G4C	13.2303	2.32806	0.950725	2.44872	0.0143366	0.187304
OLIG3	3.10693	-3.9032	1.59472	-2.44758	0.014382	0.187743
KLK10	16.1176	-2.61957	1.07038	-2.44733	0.0143921	0.187743
TCIRG1	520.791	1.1317	0.462659	2.44608	0.0144419	0.188129
FAM123C	7.43089	-4.13414	1.69014	-2.44604	0.0144436	0.188129
WNT16	3.11705	-5.15708	2.10888	-2.44541	0.0144687	0.188177
SHOX2	5.03777	-3.76465	1.53948	-2.4454	0.0144692	0.188177
FGD5	31.2758	-1.99288	0.815139	-2.44483	0.014492	0.18833
ZNF549	51.7483	-2.70433	1.10669	-2.44361	0.014541	0.188823
MID1	144.085	1.92626	0.788479	2.44301	0.0145653	0.188997
SMPD4	326.947	1.03095	0.422102	2.44242	0.014589	0.18916
FZR1	155.827	1.39303	0.570441	2.44203	0.0146051	0.189187
OR2A14	17.0253	-2.91354	1.19318	-2.44183	0.0146131	0.189187
OXA1L	46.2903	1.71491	0.702449	2.44133	0.0146331	0.189304
ZC3H12B	12.0216	2.91969	1.19609	2.44102	0.014646	0.189328
FXYD1	8.26835	-2.88495	1.18207	-2.4406	0.0146629	0.189404
CDHR5	315.535	2.22923	0.913706	2.43977	0.0146965	0.189452
OR6B2	8.76665	-3.32588	1.36322	-2.43972	0.0146985	0.189452
ABCB4	12.0608	-2.44305	1.0014	-2.43963	0.0147022	0.189452
TIMM23	164.192	-1.25618	0.515035	-2.43902	0.0147271	0.189452
SPATA6L	17.2634	2.48601	1.01938	2.43874	0.0147385	0.189452
ANKRD53	4.34935	-3.4274	1.40545	-2.43865	0.0147422	0.189452
GSS	582.48	1.72986	0.709362	2.43861	0.014744	0.189452
TMEM70	225.431	-1.61024	0.660537	-2.43778	0.0147778	0.189744
ADAMTS10	149.156	-1.51251	0.620637	-2.43703	0.0148085	0.189857
KRT72	20.4587	-3.43067	1.40773	-2.43702	0.0148087	0.189857
GANAB	118.935	-1.14496	0.470034	-2.4359	0.0148547	0.190304
LEF1-AS1	10.8401	-3.02215	1.24081	-2.43563	0.014866	0.190307
OR10H5	141.243	-3.30804	1.35864	-2.43481	0.0148996	0.190313
CAMK2G	86.6252	1.52137	0.62493	2.43446	0.0149138	0.190313
VPS52	151.356	0.937119	0.384964	2.4343	0.0149206	0.190313
IER2	5.32079	-2.94153	1.20858	-2.43388	0.0149379	0.190313
STARD3	209.294	1.31264	0.539321	2.43387	0.0149383	0.190313
EBPL	468.954	-1.16654	0.479325	-2.43372	0.0149446	0.190313
AURKAPS1	24.6369	2.38428	0.979687	2.43371	0.0149449	0.190313
OR2W5	4.0114	-3.94297	1.62031	-2.43346	0.0149552	0.190313
BTBD17	3.47451	-3.68381	1.51474	-2.43198	0.0150164	0.1908
ADCY4	18.758	2.44423	1.00512	2.43177	0.0150251	0.1908
SNHG8	789.339	-1.66554	0.685102	-2.43108	0.0150538	0.1908
LILRP2	4.46912	-4.39415	1.80754	-2.43102	0.0150566	0.1908
RPL18A	2982.4	-1.09923	0.452172	-2.43099	0.0150575	0.1908
DPP3	94.914	1.24473	0.512039	2.43093	0.0150602	0.1908
TRIM11	68.5167	1.64578	0.677227	2.43018	0.0150914	0.191054
TDP1	36.6121	-1.55176	0.638666	-2.42969	0.0151115	0.191071
ZNF501	4.21089	3.94077	1.62212	2.4294	0.0151239	0.191071
ERVV-1	7.40263	4.74311	1.95244	2.42932	0.015127	0.191071
OR2A25	3.16513	-3.23063	1.32998	-2.42908	0.0151373	0.191071
RRAS2	195.642	-1.40576	0.578916	-2.42827	0.015171	0.191355
NRG3	1.52876	-4.50626	1.85585	-2.42814	0.0151764	NA
TMEM80	63.4189	-1.67802	0.691205	-2.42768	0.0151959	0.191368
ABCA6	21.755	-1.91907	0.790524	-2.4276	0.0151992	0.191368
CCDC124	332.047	1.40236	0.577711	2.42745	0.0152054	0.191368
KCNB2	1.84158	-4.19394	1.72809	-2.42692	0.0152278	0.191508
SYNPO	221.564	2.827	1.1653	2.42599	0.0152667	0.191694
BRAF	130.304	1.26818	0.522816	2.42567	0.0152803	0.191694
C4BPA	7.08055	4.71401	1.94344	2.42561	0.0152828	0.191694
COX5A	604.442	-1.29701	0.534768	-2.42538	0.0152925	0.191694
HEATR5A	46.2038	1.62731	0.670991	2.42524	0.0152984	0.191694
OAS3	96.7679	1.52431	0.628651	2.42474	0.0153195	0.191818
STRC	7.35265	3.64661	1.50427	2.42417	0.0153435	0.191921
USP6NL	103.975	-1.38525	0.571471	-2.42401	0.0153501	0.191921
GLB1L	11.3315	3.23605	1.33545	2.42319	0.0153849	0.192199
C16orf95	8.10869	-2.44036	1.00741	-2.42241	0.0154181	0.192199
CHCHD1	12.9177	-2.21597	0.91484	-2.42225	0.0154248	0.192199
RPL10	5874.44	-1.11085	0.458659	-2.42195	0.0154377	0.192199
PRSS27	8.53654	-3.0369	1.25403	-2.42172	0.0154475	0.192199
SLC7A1	521.967	-1.49903	0.619023	-2.42161	0.0154518	0.192199
HYAL1	73.1052	2.4643	1.01763	2.42161	0.0154519	0.192199
ELP5	112.087	-1.2867	0.531399	-2.42134	0.0154635	0.192199
MGP	9.6857	-3.20712	1.32465	-2.42111	0.0154732	0.192199
CYLC2	1.40985	-4.54286	1.87643	-2.42101	0.0154773	NA
NUBP2	6.26478	-2.5311	1.04577	-2.42031	0.0155071	0.192435
HERC2P7	29.7526	2.59746	1.07327	2.42014	0.0155146	0.192435
ZNF780A	428.528	-1.31144	0.54205	-2.41942	0.0155454	0.19255
TIMELESS	72.7431	1.81634	0.750741	2.4194	0.0155463	0.19255
YOD1	138.9	1.65221	0.683874	2.41595	0.0156942	0.194163
C1orf115	28.9202	1.79479	0.742927	2.41584	0.0156992	0.194163
ZNF76	26.9397	2.11722	0.876629	2.41518	0.0157275	0.194281
CNTN5	3.65551	-3.44107	1.42486	-2.41502	0.0157344	0.194281
RIN1	141.702	2.14721	0.889234	2.41467	0.0157494	0.194281
CN5H6.4	7.83661	-2.32039	0.960999	-2.41456	0.0157541	0.194281
LOC494127	2.56361	-4.55013	1.88608	-2.41248	0.0158443	0.195253
HNF1A	120.787	2.23697	0.927742	2.4112	0.0159001	0.1958
ZNF706	243.859	-1.24576	0.516713	-2.41093	0.0159119	0.1958
NDUFS4	442.258	-1.31458	0.545416	-2.41024	0.0159421	0.1958
ANKRD35	4.25368	4.01257	1.66509	2.40983	0.01596	0.1958
CXXC5	93.75	1.62856	0.675892	2.4095	0.0159744	0.1958
SNORA36C	99.519	-2.00542	0.83237	-2.40929	0.0159838	0.1958
TOP1P2	2.59646	-4.5282	1.8795	-2.40926	0.0159848	0.1958
LOC143666	25.7392	-2.40916	1.00002	-2.40912	0.0159912	0.1958
GARNL3	17.2812	2.40278	0.997374	2.40911	0.0159914	0.1958
PIGM	40.1831	1.93922	0.805103	2.40866	0.0160112	0.195903
LOC389641	56.8654	-1.71403	0.712026	-2.40725	0.0160731	0.196496
H2BFM	10.8337	-3.4396	1.42914	-2.40675	0.016095	0.196496
SPEF1	2.3641	-4.5511	1.8913	-2.40634	0.0161133	0.196496
LENG9	1467.68	-0.930592	0.386731	-2.4063	0.0161149	0.196496
SRSF5	924.375	1.0692	0.444343	2.40626	0.016117	0.196496
HELT	1.4444	-4.75147	1.97532	-2.40542	0.0161539	NA
PCDHGB6	6.00488	4.50681	1.87387	2.40508	0.0161687	0.196758
SPAST	329.207	-1.39661	0.580702	-2.40503	0.0161711	0.196758
ZC3H7B	126.529	1.28008	0.532261	2.40499	0.0161729	0.196758
PGA5	3.28265	-3.35674	1.39609	-2.40439	0.0161994	0.196942
FAM105A	158.377	-1.71172	0.71205	-2.40393	0.0162197	0.197049
SS18L2	40.5501	-1.64105	0.682887	-2.40311	0.0162562	0.197352
FLJ46906	41.2709	2.91795	1.21441	2.40276	0.0162717	0.197401
ZNF187	19.196	1.64067	0.682938	2.40237	0.0162894	0.197476
METTL12	20.3701	3.26006	1.35717	2.4021	0.0163012	0.197479
CYS1	15.2434	3.63329	1.51299	2.40139	0.0163329	0.197724
ASPDH	4.47974	-2.86412	1.19289	-2.40101	0.0163501	0.197792
DOK3	10.1874	-2.26508	0.943546	-2.40061	0.0163679	0.197868
HELB	32.2056	1.90745	0.794798	2.39992	0.0163988	0.198102
STYK1	29.6784	1.9543	0.814565	2.39919	0.0164314	0.198356
S100A1	13.3716	3.89023	1.62173	2.39881	0.0164483	0.198406
GLRA2	18.4712	6.06898	2.53024	2.39858	0.0164586	0.198406
LOC440944	71.0576	-1.73296	0.722746	-2.39774	0.0164964	0.198671
EFCAB13	14.4404	-2.89513	1.20752	-2.39758	0.0165038	0.198671
LOC100129250	51.643	-1.64456	0.686207	-2.39659	0.0165483	0.199067
MTMR10	257.928	1.38303	0.577225	2.396	0.0165753	0.19915
NHS	25.9127	2.20744	0.921329	2.39593	0.0165784	0.19915
PMEL	5.9889	3.30611	1.38033	2.39515	0.0166136	0.199433
GPR97	4.45243	4.08366	1.70545	2.39448	0.0166441	0.199652
PDK4	467.263	2.40498	1.00449	2.39423	0.0166551	0.199652
GTF3A	1602.06	-1.2519	0.523005	-2.39367	0.0166806	0.199662
RPS7	27.6661	-1.68008	0.701925	-2.39353	0.0166873	0.199662
ENDOV	11.896	2.127	0.888677	2.39345	0.0166909	0.199662
AHCYL1	358.163	1.29759	0.542207	2.39316	0.0167037	0.199677
SSX3	1.95694	-4.99252	2.08638	-2.39291	0.0167155	0.199678
ZNHIT3	85.2662	-1.27249	0.531917	-2.39227	0.0167447	0.199837
MRPS7	187.105	-1.22198	0.51084	-2.3921	0.0167521	0.199837
MUC1	149.422	1.91761	0.802302	2.39013	0.0168422	0.200504
KCNA7	2.61849	-4.64027	1.94151	-2.39003	0.016847	0.200504
CLK4	84.1477	-1.90378	0.796641	-2.38975	0.0168597	0.200504
PACS1	101.567	1.29192	0.540615	2.38972	0.016861	0.200504
C16orf92	2.53355	-3.32463	1.39129	-2.38961	0.0168665	0.200504
CES4A	6.62264	3.42104	1.43202	2.38896	0.016896	0.200716
TMED2	1234.91	-1.37718	0.576677	-2.38812	0.0169347	0.200919
OR9Q2	4.14708	-3.01595	1.26301	-2.3879	0.016945	0.200919
CSRP2BP	121.593	-1.48017	0.619882	-2.38783	0.0169482	0.200919
CBX3	1627.47	-1.71651	0.719139	-2.38689	0.0169914	0.201208
PRR14L	253.748	1.09517	0.458894	2.38653	0.017008	0.201208
GPR34	15.2567	-2.99238	1.25387	-2.38651	0.0170092	0.201208
RPS26	7632.68	-1.76136	0.738116	-2.38629	0.0170195	0.201208
GALNT12	212.719	1.39177	0.583416	2.38555	0.0170535	0.201471
QRSL1	82.4551	-1.65206	0.69285	-2.38444	0.017105	0.201831
SCARNA5	16820.9	-1.53906	0.645473	-2.38439	0.0171075	0.201831
SOX21	6.37355	-3.59002	1.5058	-2.38413	0.0171197	0.201836
FBXO30	46.7225	2.11852	0.888774	2.38365	0.0171421	0.201872
SLAMF8	93.4621	2.43055	1.01974	2.3835	0.0171488	0.201872
FAM114A1	79.4909	2.3122	0.970167	2.3833	0.017158	0.201872
RASAL1	50.1268	2.6829	1.12614	2.38239	0.0172007	0.202008
RAB40A	2.89668	-3.6248	1.52157	-2.38227	0.0172061	0.202008
RNPC3	168.659	1.67109	0.701531	2.38206	0.0172163	0.202008
NPY1R	6.56874	-3.26488	1.37066	-2.38197	0.0172202	0.202008
CNIH3	5.19103	4.29718	1.80418	2.3818	0.0172285	0.202008
RALGDS	156.666	1.89181	0.794421	2.38137	0.0172482	0.2021
DOK4	269.154	1.4109	0.592609	2.38083	0.0172737	0.202261
H1FX	390.172	1.17145	0.492207	2.38	0.0173126	0.202506
BTRC	84.02	1.31822	0.553903	2.37988	0.0173182	0.202506
CABP1	7.37371	3.59511	1.51131	2.37881	0.0173687	0.202958
CDAN1	25.6514	2.02066	0.849545	2.37853	0.017382	0.202975
CAPN5	50.1072	2.80472	1.17933	2.37823	0.0173962	0.203003
LOC200772	8.80247	4.92784	2.07311	2.37703	0.0174526	0.203523
REG4	270.23	4.17458	1.75709	2.37585	0.0175088	0.203942
NKX6-2	20.0578	-3.43331	1.44539	-2.37535	0.0175325	0.203942
DHRS3	150.59	1.18498	0.498872	2.37532	0.0175339	0.203942
OR2W1	2.50982	-5.19722	2.18805	-2.37527	0.0175361	0.203942
HDAC1	963.443	1.07635	0.453317	2.3744	0.0175776	0.204177
FBXW5	519.208	1.35355	0.570073	2.37434	0.0175801	0.204177
FAM167A	8.35841	3.18698	1.34252	2.37388	0.0176023	0.204297
MED8	114.084	1.27014	0.535468	2.37202	0.0176912	0.204946
COL4A2	712.346	1.25217	0.527933	2.37183	0.0177004	0.204946
ZNF33B	171.875	-1.03341	0.435737	-2.37164	0.0177093	0.204946
ADAMTS6	82.8141	1.77908	0.750235	2.37136	0.0177225	0.204946
HDGFL1	10.7128	-3.04837	1.28551	-2.37134	0.0177239	0.204946
FIZ1	33.8983	-1.35707	0.57231	-2.37121	0.0177299	0.204946
CCDC94	34.0216	2.49119	1.05107	2.37015	0.0177811	0.205398
NOSIP	155.534	1.18745	0.50124	2.36903	0.017835	0.205834
ATP5L	8180.28	-1.5326	0.647099	-2.36842	0.0178644	0.205834
SNHG6	1958.81	-1.58793	0.670466	-2.3684	0.0178652	0.205834
RPL23AP53	19.7956	2.03636	0.859814	2.36837	0.0178668	0.205834
CHD3	964.39	-1.21271	0.512224	-2.36754	0.0179068	0.206157
PSMD7	364.307	-0.885112	0.373971	-2.3668	0.0179428	0.206265
MRPL48	55.1871	-1.56566	0.661553	-2.36664	0.0179505	0.206265
LOC100506746	4.3333	4.04514	1.70926	2.3666	0.0179523	0.206265
LOC100131825	5.23133	-4.42164	1.86941	-2.36526	0.0180175	0.206646
ACSF2	83.5045	2.03312	0.85967	2.365	0.0180299	0.206646
PAK1	1012.68	1.23941	0.524078	2.36493	0.0180333	0.206646
ZNF137P	25.7792	-2.62322	1.10924	-2.36489	0.0180354	0.206646
EYA1	3.07388	-3.19982	1.35327	-2.3645	0.0180543	0.206646
FADS6	9.75112	-3.51586	1.48718	-2.36412	0.0180731	0.206646
UQCRFS1	641.619	-0.918801	0.388652	-2.36408	0.0180751	0.206646
PKI55	64.9002	-1.69026	0.715021	-2.36393	0.0180822	0.206646
UBR4	424.243	1.53037	0.647462	2.36365	0.0180959	0.206646
FAM223B	10.7568	-1.80491	0.763678	-2.36344	0.018106	0.206646
NRAS	118.65	1.9858	0.840499	2.36265	0.0181449	0.206888
KLK1	60.0832	2.18554	0.92509	2.36252	0.0181512	0.206888
SETMAR	68.5843	-1.55454	0.658457	-2.36089	0.0182312	0.207661
AIF1L	139.851	-1.84822	0.783181	-2.35989	0.0182801	0.208028
GAS7	187.621	1.61373	0.683859	2.35974	0.0182877	0.208028
OR4C13	11.1464	-7.87447	3.33796	-2.35906	0.0183211	0.20821
OR10G2	5.77664	-2.86561	1.21488	-2.35876	0.0183362	0.20821
ZNF140	87.5195	-1.54074	0.653253	-2.35856	0.0183461	0.20821
RNF167	232.419	-1.13518	0.481329	-2.35843	0.0183522	0.20821
TPRN	66.9697	1.54689	0.656067	2.35782	0.0183825	0.208306
CCRL2	44.8092	1.97073	0.835865	2.35771	0.0183879	0.208306
APBA2	46.2078	2.32195	0.984993	2.35733	0.0184069	0.208306
RBM12	105.972	-2.00319	0.849787	-2.35728	0.0184093	0.208306
IL6	20.1591	2.77366	1.17712	2.35631	0.0184574	0.208653
MED15	579.834	1.14343	0.485289	2.35617	0.0184643	0.208653
RSPO4	5.02169	-3.64718	1.54856	-2.35521	0.0185125	0.208967
MSL3	196.231	-1.56809	0.665821	-2.35513	0.0185164	0.208967
PSMC1	232.477	1.45006	0.615867	2.35451	0.0185474	0.209179
ARHGAP26	12.7724	2.81384	1.19524	2.35422	0.0185618	0.209204
PPAPDC1B	97.3986	1.63724	0.695521	2.35397	0.0185741	0.209205
LCN12	12.7728	4.295	1.82543	2.35287	0.0186291	0.209688
ICAM5	6.13684	4.49239	1.91086	2.35097	0.0187245	0.210623
GDF9	8.30523	-2.89835	1.23312	-2.35043	0.0187517	0.210791
LOC338758	11.0107	-2.25382	0.959337	-2.34935	0.0188061	0.21108
PPP1R3C	6.11969	3.42609	1.45836	2.34928	0.0188097	0.21108
UBE2A	446.735	-0.938027	0.399298	-2.34919	0.0188144	0.21108
COL6A3	68.7417	2.97227	1.26565	2.34842	0.0188533	0.211248
MOAP1	121.687	-1.03747	0.441778	-2.34841	0.0188539	0.211248
SNORA68	61474	-1.89245	0.806168	-2.34747	0.0189014	0.211459
FOXD4L1	7.4794	3.66557	1.56154	2.3474	0.018905	0.211459
UFM1	39.0679	-1.30763	0.557078	-2.34731	0.0189098	0.211459
CLPTM1	417.798	1.07482	0.458034	2.3466	0.0189457	0.211577
OR5M3	4.44766	-3.48051	1.48323	-2.34657	0.018947	0.211577
LOC100506178	5.6193	-2.66358	1.13519	-2.34637	0.0189573	0.211577
WDFY1	117.844	1.17323	0.500403	2.34458	0.0190487	0.212028
OR5AN1	3.5678	-3.43062	1.46327	-2.34449	0.0190533	0.212028
SPCS1	599.337	-1.06108	0.452606	-2.34439	0.0190584	0.212028
XRRA1	8.03413	3.67587	1.56809	2.34417	0.0190696	0.212028
OR52I2	452.397	-2.85228	1.21678	-2.34412	0.0190719	0.212028
APIP	409.878	-1.69451	0.722877	-2.34412	0.0190719	0.212028
ACOX1	153.571	-1.17575	0.501659	-2.34371	0.0190929	0.212059
LOC149950	3.0708	-5.59541	2.38754	-2.34359	0.0190994	0.212059
OR5B12	7.13826	-3.98128	1.69906	-2.34322	0.019118	0.212072
NTNG1	2.76571	-4.18087	1.78435	-2.34308	0.0191253	0.212072
SIVA1	117.516	1.43524	0.612747	2.34231	0.0191649	0.212289
PRRX1	6.44098	-2.22316	0.949168	-2.34222	0.0191696	0.212289
GOLGA8B	93.7156	2.17085	0.927058	2.34165	0.0191985	0.212471
CCDC89	10.1514	4.01102	1.71332	2.34108	0.0192282	0.212663
DIP2A	115.64	1.44508	0.617386	2.34064	0.0192507	0.212697
ZNF26	46.7525	-1.14868	0.490855	-2.34016	0.0192754	0.212697
TCTN3	55.964	1.44217	0.616296	2.34005	0.0192809	0.212697
APPL2	126.28	1.5543	0.664327	2.33966	0.0193013	0.212697
P2RY2	40.1374	2.49019	1.06458	2.33913	0.0193289	0.212697
TMEM117	47.2859	1.90221	0.813233	2.33908	0.0193315	0.212697
HOXD9	57.3349	2.3453	1.0027	2.339	0.0193357	0.212697
TBC1D13	65.8392	1.2707	0.543269	2.33899	0.019336	0.212697
DIABLO	2.80754	-3.09067	1.32148	-2.3388	0.0193458	0.212697
TRAF2	25.6423	1.82025	0.778346	2.33862	0.0193552	0.212697
FAM155A	9.29579	3.71331	1.5881	2.33822	0.0193761	0.212719
ZNF518A	4.27479	-2.2963	0.982194	-2.33792	0.0193912	0.212719
MED4	330.999	-0.910255	0.389354	-2.33786	0.0193944	0.212719
SMURF1	228.279	1.1992	0.513103	2.33715	0.0194314	0.212988
CRADD	27.0218	1.77839	0.761113	2.33657	0.0194616	0.213183
FCHSD1	35.8782	2.57729	1.10319	2.33623	0.0194794	0.213241
PSMD3	246.297	1.32984	0.569319	2.33585	0.0194989	0.213319
TRAPPC12	171.961	1.49037	0.638508	2.33415	0.019588	0.2139
LOC728730	10.5143	3.16449	1.35592	2.33383	0.0196048	0.2139
HEXA	8.29999	-2.11116	0.904681	-2.33359	0.0196171	0.2139
ARHGEF4	14.4956	3.19682	1.36994	2.33355	0.0196191	0.2139
POLR2J3	116.388	-1.45793	0.624768	-2.33355	0.0196194	0.2139
BCAS1	179.66	2.23746	0.95888	2.33341	0.0196268	0.2139
NUFIP2	193.292	1.32865	0.56951	2.33297	0.01965	0.214016
NUDT13	8.02371	3.77388	1.61794	2.33253	0.019673	0.214063
FAM71F2	4.0772	-3.62574	1.55451	-2.33241	0.0196793	0.214063
UTP3	167.914	1.32633	0.568723	2.33212	0.0196942	0.21409
TJP2	323.617	1.22689	0.526269	2.3313	0.0197376	0.2143
VPS13D	86.1377	1.47276	0.631756	2.33122	0.0197419	0.2143
EPYC	13.2422	4.41801	1.89529	2.33105	0.0197509	0.2143
RTN4RL1	3.22676	-4.64968	1.99615	-2.32932	0.019842	0.215151
NOX4	103.731	-2.12817	0.913873	-2.32874	0.0198728	0.215349
TOMM5	2.95515	-3.54628	1.5233	-2.32803	0.0199107	0.215624
PRAMEF1	1.46332	-4.74713	2.03957	-2.32752	0.0199378	NA
HEATR7A	471.918	1.87344	0.80507	2.32706	0.0199622	0.216046
WWC2-AS2	7.57674	-2.03387	0.8743	-2.32629	0.0200031	0.216229
CIZ1	215.313	0.964623	0.414666	2.32627	0.0200044	0.216229
FAM111B	206.749	-2.17362	0.934657	-2.32558	0.0200408	0.21639
C21orf2	18.0963	-1.55849	0.670172	-2.32551	0.0200446	0.21639
PAR1	9.61261	-2.43387	1.04697	-2.32468	0.0200889	0.216629
ACTR3BP2	5.54359	-2.38314	1.02518	-2.3246	0.0200933	0.216629
FAM98A	138.044	-1.0227	0.44005	-2.32405	0.0201228	0.216629
CTSF	39.5645	2.37073	1.02015	2.32391	0.0201305	0.216629
ZNF33A	361.836	-1.27874	0.550277	-2.32381	0.0201356	0.216629
LOC100132707	3.60599	3.80109	1.6358	2.32368	0.0201424	0.216629
KRTAP15-1	7.82442	-3.65262	1.57229	-2.32312	0.0201726	0.216711
DEFB127	18.9292	-3.40276	1.46499	-2.32272	0.020194	0.216711
IL17RA	112.344	1.15906	0.499021	2.32266	0.0201973	0.216711
FRMD8	128.508	1.27243	0.547902	2.32238	0.0202127	0.216711
ZBTB40	50.7197	1.33785	0.57609	2.32229	0.0202175	0.216711
FAM205A	111.594	-3.13465	1.3499	-2.32213	0.0202258	0.216711
CXADRP3	3.18606	-4.74521	2.04404	-2.32148	0.020261	0.216952
TM6SF1	26.9765	-1.86414	0.803103	-2.32117	0.0202774	0.216992
MRPS23	274.313	-1.06496	0.459096	-2.31968	0.0203582	0.217328
RELA	145.043	0.989976	0.426801	2.31952	0.0203666	0.217328
LOC339240	10.7316	-4.00008	1.72459	-2.31944	0.0203712	0.217328
SLC37A4	13.6707	-2.92612	1.26169	-2.3192	0.020384	0.217328
LIPM	18.6564	-3.09885	1.3362	-2.31916	0.0203866	0.217328
TMED8	49.7027	1.4046	0.605735	2.31883	0.0204042	0.217328
ZNF577	3.86372	-2.98504	1.2874	-2.31867	0.0204131	0.217328
LOC387723	3.32022	3.5706	1.54018	2.31831	0.0204325	0.217328
ANKRD54	86.2358	1.45659	0.628409	2.3179	0.0204545	0.217328
SMR3A	17.9022	-3.41291	1.4726	-2.31761	0.0204708	0.217328
PNPT1	259.273	-1.15461	0.498205	-2.31753	0.0204748	0.217328
SRPX2	505.039	2.24834	0.970146	2.31752	0.0204753	0.217328
ZNF500	32.0842	1.8964	0.818309	2.31747	0.0204784	0.217328
SNX21	178.114	1.61737	0.697946	2.31732	0.0204862	0.217328
HELZ2	356.163	1.78574	0.770792	2.31676	0.0205169	0.21752
TLX1	7.95778	4.88104	2.10754	2.31599	0.0205589	0.217688
TXK	16.6484	2.77407	1.19783	2.31591	0.0205633	0.217688
C20orf118	104.973	1.75582	0.758202	2.31577	0.0205708	0.217688
VSX2	3.39299	-4.67835	2.02067	-2.31524	0.0205996	0.217767
NEB	21.8996	3.12092	1.34818	2.31492	0.0206173	0.217767
POLR2J4	3.86368	-3.18831	1.37732	-2.31486	0.0206204	0.217767
ZMIZ1	244.955	1.60083	0.691682	2.31441	0.0206455	0.217767
GTF2IRD1	463.562	1.86211	0.804739	2.31393	0.0206713	0.217767
MFNG	64.5564	-1.91608	0.828065	-2.31393	0.0206717	0.217767
APBB1IP	206.225	-2.20667	0.953719	-2.31375	0.0206815	0.217767
SEC14L2	18.7611	1.87248	0.809298	2.31371	0.0206835	0.217767
ZNF300	44.2388	-2.35679	1.01869	-2.31355	0.0206925	0.217767
EXOC3	94.4914	1.28322	0.554848	2.31274	0.020737	0.218101
TNFSF18	5.41442	-3.1256	1.3518	-2.31217	0.0207681	0.218158
GALNT14	38.6853	2.78527	1.20472	2.31197	0.0207793	0.218158
ZFP90	29.4245	-1.66912	0.721955	-2.31195	0.0207806	0.218158
NUCB1	569.998	1.26681	0.548238	2.31069	0.02085	0.218542
ANKRD27	78.452	-0.992512	0.429547	-2.3106	0.0208549	0.218542
ACADL	4.4211	-3.45271	1.4944	-2.31042	0.0208647	0.218542
PSMA5	259.912	-1.19327	0.516485	-2.31036	0.0208681	0.218542
TBC1D24	129.416	1.39814	0.605273	2.30993	0.0208922	0.218661
JUP	1371.04	1.43611	0.622042	2.3087	0.0209603	0.219138
FAM125A	5.54279	-3.18908	1.38137	-2.30864	0.0209633	0.219138
BMP15	1.94311	-4.17296	1.80935	-2.30632	0.0210925	0.220114
TRIM38	35.9808	1.4976	0.649345	2.30632	0.0210925	0.220114
SETD1A	151.62	1.01335	0.439388	2.30628	0.0210952	0.220114
C12orf43	36.9822	2.1534	0.934021	2.30552	0.0211377	0.220245
SOD2	1403.44	1.50495	0.652822	2.3053	0.02115	0.220245
NKX2-5	2.68396	-3.76183	1.63188	-2.30521	0.021155	0.220245
RBM26	89.5262	-1.01257	0.439269	-2.30513	0.0211592	0.220245
ENPP2	75.4958	1.81182	0.786228	2.30445	0.0211977	0.220412
FGD6	134.783	1.21276	0.526281	2.30439	0.0212009	0.220412
LOC100132352	78.7919	-1.13484	0.492576	-2.3039	0.0212284	0.220491
CRYGN	2.5705	-4.86156	2.11024	-2.30379	0.0212342	0.220491
OTUD7B	182.458	1.02762	0.446183	2.30313	0.0212714	0.220744
ZNF683	6.03065	3.37156	1.46453	2.30215	0.0213266	0.221182
DGKD	143.484	1.39825	0.607823	2.30042	0.0214247	0.222066
PCIF1	364.847	1.6165	0.702948	2.2996	0.0214711	0.222413
HS3ST2	5.39352	-3.59549	1.56452	-2.29814	0.0215536	0.223016
NPS	1.68758	-3.75104	1.63223	-2.29811	0.0215554	0.223016
PRR15L	726.061	1.66403	0.724177	2.29782	0.0215719	0.22303
HERC2P4	9.48744	-2.25125	0.979879	-2.29748	0.0215914	0.22303
FGFR1OP	250.962	-1.03642	0.451128	-2.2974	0.0215957	0.22303
FLJ42289	2.14553	-5.34928	2.32912	-2.29669	0.0216364	0.223316
SYNGR2	913.01	-0.980465	0.426947	-2.29646	0.0216497	0.223319
NFKBIA	501.749	1.29398	0.563674	2.29561	0.0216981	0.223428
FSTL1	1446.75	2.52196	1.09865	2.2955	0.0217047	0.223428
PTPDC1	20.3321	1.67609	0.730199	2.29539	0.0217108	0.223428
SNTG1	1.73151	-4.35294	1.89641	-2.29536	0.0217124	0.223428
LOC401242	1.30068	-4.3335	1.8887	-2.29444	0.0217654	NA
PLCB1	39.4904	2.24351	0.977929	2.29414	0.0217823	0.223906
PFKFB2	342.839	1.35869	0.592287	2.29397	0.0217921	0.223906
WDR5B	101.119	1.49189	0.65044	2.29366	0.0218098	0.223906
OTUD4	255.13	1.36097	0.593367	2.29364	0.0218111	0.223906
CHI3L2	14.2357	-1.78631	0.779199	-2.29249	0.0218773	0.224452
SF3B4	65.9279	2.10639	0.918923	2.29223	0.0218922	0.22447
SLC12A7	447.175	1.91454	0.835312	2.292	0.0219056	0.224474
PF4	8.62294	-2.64271	1.15334	-2.29134	0.0219435	0.224727
CORIN	7.00219	3.85802	1.68414	2.29079	0.0219754	0.224871
PUS1	43.9507	1.79876	0.785268	2.29063	0.0219849	0.224871
ORC4	4.3568	-4.08957	1.78551	-2.29042	0.0219968	0.224871
INPP5J	33.0871	2.13291	0.931597	2.28952	0.0220491	0.225041
C16orf93	4.52227	4.03798	1.76373	2.28946	0.0220527	0.225041
GRK5	118.148	1.50434	0.657075	2.28946	0.0220528	0.225041
DUSP18	232.553	1.50428	0.657175	2.28901	0.0220788	0.225095
GNG10	596.214	-1.04873	0.458188	-2.28886	0.0220874	0.225095
FCGR2B	789.993	-2.24108	0.979197	-2.28869	0.0220974	0.225095
GTF2B	6.41071	3.17443	1.38732	2.28817	0.0221276	0.225268
TMEM9	142.475	1.61105	0.704541	2.28666	0.0222157	0.226031
MED9	113.798	1.83248	0.801569	2.28611	0.0222476	0.226221
CDC40	249.148	-1.3055	0.571136	-2.2858	0.0222658	0.226272
LOC392232	20.472	-3.17849	1.39085	-2.28528	0.0222965	0.22643
TNFAIP1	392.319	1.45732	0.637785	2.28497	0.0223144	0.22643
OR14I1	6.02361	-3.06974	1.34351	-2.28486	0.0223209	0.22643
LOC100130700	1.4179	-4.68525	2.05072	-2.28469	0.0223311	NA
CARD10	52.4903	1.74446	0.763592	2.28454	0.0223397	0.226486
LOC731275	92.0254	1.24437	0.54503	2.28313	0.0224225	0.227086
SYCP2L	14.086	-2.46869	1.08129	-2.28309	0.0224253	0.227086
TSPYL1	265.211	1.50273	0.658295	2.28277	0.022444	0.227141
LOC100507032	3.66168	3.77309	1.6532	2.28229	0.0224723	0.227293
ZNF260	157.04	-1.92312	0.842755	-2.28194	0.0224929	0.227367
ACTRT2	4.76989	-4.2017	1.84147	-2.28171	0.0225067	0.227373
ACAD10	67.9054	-1.72096	0.754381	-2.28129	0.0225314	0.227398
ZNF626	37.559	-2.3976	1.05118	-2.28086	0.0225566	0.227398
WDR11-AS1	1.82871	-4.76126	2.08756	-2.28078	0.0225617	0.227398
PPIAL4G	78.7996	-2.0624	0.904255	-2.28077	0.0225622	0.227398
SRBD1	212.569	-1.09115	0.478568	-2.28004	0.0226056	0.227702
ZNF498	227.411	-2.2557	0.989763	-2.27903	0.0226652	0.22797
HMGB3P1	4.19901	-3.50903	1.53977	-2.27893	0.022671	0.22797
KRTAP13-2	3.78232	-3.90562	1.71404	-2.2786	0.0226909	0.22797
LINC00599	2.59862	-3.26013	1.43081	-2.27852	0.0226958	0.22797
NUP214	437.003	1.04384	0.458134	2.27847	0.0226986	0.22797
PEX3	80.8442	1.20003	0.526822	2.27787	0.0227343	0.228195
NAPSB	51.7923	-2.68142	1.17765	-2.27692	0.0227908	0.228415
ANP32AP1	14.9721	-1.71903	0.755043	-2.27672	0.0228027	0.228415
SUMO1P3	1663.76	-1.13238	0.497385	-2.27666	0.0228066	0.228415
CXCR2	13.4955	2.24826	0.987549	2.27661	0.0228095	0.228415
ALDH5A1	37.626	-1.63171	0.716819	-2.27632	0.0228266	0.228453
FAM110D	7.6739	-3.52137	1.54795	-2.27485	0.0229148	0.22911
C12orf69	3.17905	-3.3575	1.47605	-2.27466	0.0229265	0.22911
AMY2A	4.21106	-3.90027	1.71502	-2.27419	0.0229548	0.22911
KLHL34	7.63887	4.77053	2.0977	2.27417	0.0229555	0.22911
NAA40	58.4133	1.43919	0.633037	2.27347	0.0229979	0.22911
AKAP17A	346.027	1.69061	0.743645	2.27341	0.0230013	0.22911
TOMM40L	56.1873	-1.5417	0.678157	-2.27336	0.0230045	0.22911
DCTN2	199.15	1.25152	0.550584	2.27307	0.0230219	0.22911
NFAM1	23.4547	2.22009	0.976823	2.27276	0.0230406	0.22911
CYP27B1	20.7733	1.95834	0.861754	2.27251	0.0230558	0.22911
DMRT2	14.2231	3.06085	1.34693	2.27246	0.0230586	0.22911
USP27X	43.5238	2.22802	0.980477	2.27238	0.0230635	0.22911
CCDC74B	42.282	-2.17599	0.957598	-2.27234	0.023066	0.22911
DENND4A	98.7492	-0.964712	0.424728	-2.27136	0.0231249	0.229563
MYLK	38.5747	2.73421	1.20392	2.2711	0.0231411	0.229591
APOA5	3.937	-3.93116	1.73167	-2.27015	0.0231982	0.229686
SYNE4	23.9023	-2.55237	1.12441	-2.26996	0.0232103	0.229686
LINC00674	132.957	-1.45236	0.639867	-2.26979	0.0232204	0.229686
ZNF268	37.933	-1.84222	0.811662	-2.26969	0.0232263	0.229686
OPA1	36.4766	1.30839	0.576493	2.26956	0.0232344	0.229686
OR6V1	8.76687	3.79436	1.67192	2.26946	0.0232405	0.229686
LRP8	281.936	1.63814	0.721845	2.26938	0.023245	0.229686
ZNF107	79.8105	-0.984918	0.434043	-2.26917	0.0232579	0.229686
MYL10	4.42155	-4.44294	1.95845	-2.2686	0.0232926	0.229686
LRRC73	102.58	-2.63067	1.15976	-2.26829	0.0233118	0.229686
OTX2-AS1	9.78616	-2.55012	1.12427	-2.26823	0.023315	0.229686
ZNF470	17.3544	-2.03707	0.898101	-2.26819	0.0233176	0.229686
SEC22C	29.5313	-1.38247	0.609559	-2.26798	0.0233303	0.229686
DSG1	4.99322	4.19047	1.84777	2.26785	0.0233382	0.229686
SSBP4	89.447	1.15651	0.510165	2.26694	0.0233938	0.230102
PRRT1	3.96021	3.81983	1.68537	2.26647	0.0234225	0.230155
ZNF768	161.29	1.45221	0.640783	2.2663	0.0234331	0.230155
RHOD	65.9501	1.69033	0.745909	2.26614	0.023443	0.230155
NET1	372.562	-1.07101	0.472651	-2.26597	0.0234532	0.230155
DDX42	121.738	-0.978019	0.431652	-2.26576	0.0234663	0.230155
NUB1	250.199	1.7049	0.752595	2.26536	0.0234903	0.230259
LOC643441	1.60115	-5.09875	2.25107	-2.26504	0.0235103	NA
AHSA1	379.013	-0.985401	0.435052	-2.26502	0.0235115	0.230334
KCNG1	7.05848	4.68228	2.06844	2.26367	0.0235941	0.230916
ARHGEF19	64.0659	1.54732	0.683561	2.26362	0.0235978	0.230916
TMEM50B	123.892	-1.17138	0.517563	-2.26327	0.0236191	0.230993
SPTBN5	141.612	-2.25789	0.997898	-2.26265	0.0236575	0.231237
ADH6	7.83402	3.6579	1.61682	2.26241	0.0236723	0.23125
LINC00469	1.40697	-5.12452	2.26657	-2.26092	0.0237642	NA
GRSF1	81.8199	1.23971	0.548352	2.2608	0.0237719	0.23209
OR1D5	5.10359	-3.61303	1.59866	-2.26003	0.0238193	0.232255
C12orf57	324.239	-1.23548	0.546758	-2.25965	0.023843	0.232255
DNAJB4	26.7975	1.71404	0.758646	2.25934	0.0238621	0.232255
ANKFY1	90.0663	1.13217	0.501128	2.25925	0.0238679	0.232255
NBPF3	12.8713	2.4226	1.07231	2.25922	0.0238695	0.232255
TFDP3	1.65088	-4.7486	2.10212	-2.25895	0.0238864	0.232255
HMGN3	17.1434	-1.80518	0.79916	-2.25885	0.0238929	0.232255
SMARCA4	1247.71	1.73087	0.766329	2.25865	0.023905	0.232255
LINC00548	7.32136	-3.80399	1.68425	-2.25856	0.0239106	0.232255
TCL1A	20.797	-3.92128	1.73651	-2.25813	0.0239376	0.232386
SNX19	48.341	-1.29378	0.573178	-2.25721	0.023995	0.232812
OR6K6	6.41381	-2.87485	1.27377	-2.25697	0.0240102	0.232827
TREM1	50.6785	2.3857	1.05725	2.25652	0.0240378	0.232963
PHF13	88.5244	1.29005	0.571789	2.25616	0.0240603	0.233022
ADRB2	14.5701	2.6516	1.17536	2.25599	0.0240711	0.233022
SELP	3.9003	3.89368	1.72658	2.25515	0.024124	0.233357
CRHR1	3.1357	-5.00465	2.21935	-2.25501	0.0241329	0.233357
SOBP	33.7788	2.4074	1.06781	2.25451	0.024164	0.233482
DDI1	4.99555	4.11639	1.82598	2.25434	0.0241748	0.233482
SST	10.888	-2.57984	1.14458	-2.25395	0.0241991	0.233482
GP5	3.07605	-4.44356	1.97149	-2.25391	0.0242016	0.233482
JAKMIP2-AS1	3.94607	-2.73211	1.21227	-2.25372	0.0242139	0.233482
C1QTNF7	3.43163	-3.25711	1.44554	-2.25321	0.0242457	0.233658
HAX1	557.812	-0.979571	0.434789	-2.25298	0.0242604	0.233668
DNAH7	4.19461	4.01019	1.78039	2.25241	0.0242961	0.233881
FGF4	10.3813	-2.79971	1.24359	-2.25131	0.0243659	0.234313
PFN4	21.585	-2.74476	1.2192	-2.25127	0.0243684	0.234313
PPP1R11	202.007	1.07554	0.47782	2.25093	0.0243899	0.23435
RAB11B	389.606	1.15724	0.51415	2.25078	0.0243995	0.23435
LY6G6E	22.6554	5.52448	2.45514	2.25017	0.0244383	0.234421
ISL2	4.17227	3.93965	1.75091	2.25005	0.0244456	0.234421
TCEA3	456.157	1.68613	0.749421	2.24991	0.0244546	0.234421
PAPOLB	7.27686	-2.36722	1.05219	-2.2498	0.0244616	0.234421
TAB1	45.2125	1.26441	0.562166	2.24917	0.0245014	0.234446
RBMXL1	6.43328	-1.72496	0.76694	-2.24915	0.0245029	0.234446
EARS2	109.699	1.44791	0.643769	2.24912	0.0245051	0.234446
C12orf52	71.8142	-1.27635	0.567846	-2.2477	0.024595	0.235175
FKBP10	412.489	1.39531	0.621059	2.24666	0.0246619	0.23535
SARDH	5.57638	3.30243	1.46998	2.24658	0.0246668	0.23535
TMEM167B	89.4365	1.3616	0.606121	2.24643	0.0246768	0.23535
CCRL1	11.0999	-2.46323	1.09652	-2.24642	0.024677	0.23535
PLOD3	245.331	1.49484	0.665452	2.24634	0.024682	0.23535
ALOXE3	75.2228	-3.03073	1.3494	-2.24598	0.024705	0.235439
CAPG	469.794	1.21135	0.539513	2.24526	0.0247511	0.235553
CTRB2	3.53625	-3.93132	1.75094	-2.24526	0.0247513	0.235553
RABL5	73.8791	1.68979	0.752807	2.24465	0.0247909	0.235553
PAR-SN	65.4774	-1.85652	0.827156	-2.24446	0.0248025	0.235553
VDAC1	1145.61	-1.30258	0.580394	-2.2443	0.0248134	0.235553
FAM219A	38.754	2.05177	0.914285	2.24413	0.0248241	0.235553
LILRA5	3.45692	3.72452	1.65968	2.24412	0.0248246	0.235553
LOC100144597	1.76745	-4.79507	2.13676	-2.24409	0.0248269	0.235553
LOC100505817	2.48864	-3.89044	1.73418	-2.24339	0.0248717	0.235848
USP54	430.433	1.50771	0.672191	2.24298	0.0248981	0.235965
IL17RC	16.566	2.60265	1.1605	2.24269	0.0249166	0.235965
LOC100289361	12.5607	1.99927	0.891515	2.24256	0.0249253	0.235965
HIST3H2A	10.1249	-2.18051	0.972605	-2.24192	0.0249663	0.236189
ENOSF1	57.6578	1.43237	0.639033	2.24146	0.024996	0.236189
HOXB-AS3	5.92186	-3.37652	1.50645	-2.24137	0.0250019	0.236189
BTNL9	49.0844	-2.34017	1.0441	-2.24134	0.025004	0.236189
RASGEF1A	11.5531	2.95534	1.31913	2.24038	0.0250665	0.236649
GPR174	53.083	-2.50549	1.11862	-2.2398	0.0251039	0.23666
SNORA14A	1268.79	-1.63989	0.73224	-2.23956	0.0251197	0.23666
E2F2	3.81946	3.843	1.71602	2.23948	0.0251246	0.23666
OR2A12	4.81759	-2.97567	1.32897	-2.23908	0.0251506	0.23666
LOC442028	20.5372	-2.63799	1.1782	-2.23901	0.0251555	0.23666
C3orf67	5.02956	4.17718	1.86572	2.23892	0.0251614	0.23666
LOC100128252	18.1622	3.03973	1.35786	2.23862	0.0251808	0.23666
AMELY	1.88693	-5.54866	2.47877	-2.23848	0.02519	0.23666
CAMP	2.28347	-3.48005	1.55475	-2.23834	0.0251992	0.23666
NFKBIB	68.018	1.09299	0.488374	2.23803	0.0252194	0.23666
ANKRD9	182.847	-1.12605	0.503144	-2.23802	0.0252195	0.23666
C12orf70	2.30958	-4.18116	1.86888	-2.23725	0.0252698	0.237003
TAAR6	3.12201	-4.22233	1.88913	-2.23507	0.0254127	0.237939
NT5M	7.74212	3.70949	1.65971	2.23503	0.0254157	0.237939
PSMB6	296.155	1.98256	0.887054	2.235	0.0254174	0.237939
LOC286359	1.77775	-4.45395	1.99293	-2.23488	0.0254251	0.237939
DENND5A	72.5902	1.32478	0.592904	2.23439	0.0254572	0.238037
LPAR5	167.358	2.21748	0.992471	2.2343	0.0254634	0.238037
PHYHD1	12.8362	2.63462	1.17951	2.23366	0.0255056	0.238238
MAPK8IP3	256.7	2.03313	0.910341	2.23337	0.0255243	0.238238
HCCS	49.7485	-1.3688	0.612894	-2.23334	0.0255265	0.238238
CABIN1	161.095	1.3692	0.613248	2.2327	0.0255688	0.238415
SLC22A25	100.832	-2.85536	1.27894	-2.23259	0.0255758	0.238415
LCE4A	7.25399	-3.7811	1.69372	-2.23242	0.0255871	0.238415
ZNF638	73.1418	1.32072	0.591706	2.23206	0.0256108	0.238466
HSPA14	301.977	-1.48483	0.665273	-2.23192	0.0256204	0.238466
LOC643714	1.61183	-4.24872	1.90406	-2.2314	0.0256549	NA
NHLH1	3.06869	-5.89512	2.6435	-2.23004	0.0257445	0.239435
LCE3A	7.27083	-3.44433	1.54465	-2.22985	0.0257575	0.239435
DHRS12	12.2779	-2.89945	1.30044	-2.2296	0.025774	0.239435
RSPH9	4.35765	3.97588	1.78346	2.22931	0.0257933	0.239435
SFTA2	3.71429	-3.63184	1.62914	-2.22929	0.0257944	0.239435
RNASE2	11.6209	3.1578	1.4167	2.22898	0.0258153	0.2395
FIBP	148.778	1.15427	0.517922	2.22865	0.0258372	0.239574
LOC646813	1.53469	-4.20976	1.89045	-2.22685	0.0259571	NA
OR5K2	3.51158	-3.52317	1.58238	-2.22651	0.0259803	0.240553
NR2E1	3.63107	-3.83525	1.72256	-2.22648	0.0259823	0.240553
LOC100287632	18.8701	-2.0351	0.914062	-2.22644	0.0259849	0.240553
BIN3	105.297	1.26932	0.570363	2.22546	0.0260502	0.241027
GPN1	139.919	-0.882275	0.396563	-2.22481	0.0260943	0.241305
ATP1A2	26.7298	-2.34811	1.05583	-2.22394	0.0261527	0.241715
SH3D21	140.088	1.70205	0.765775	2.22264	0.0262399	0.24239
MYO19	47.5437	1.59268	0.716724	2.22217	0.0262718	0.242555
ANKRD20A9P	513.241	-1.34289	0.60439	-2.2219	0.0262901	0.242593
KEAP1	135.529	0.980993	0.441593	2.22149	0.026318	0.24272
TRPV5	5.28928	-4.99294	2.24833	-2.22074	0.0263689	0.242956
CCBL1	31.5506	-1.6723	0.753054	-2.22069	0.0263719	0.242956
PRSS8	2511.58	1.13967	0.513319	2.22019	0.0264057	0.243083
BTF3P11	7.12464	-3.23055	1.45516	-2.22007	0.026414	0.243083
CD40	20.6422	2.34195	1.05504	2.21978	0.026434	0.243136
MAP3K14-AS1	287.444	-2.04812	0.922971	-2.21906	0.0264829	0.243456
TESK1	65.5103	0.929828	0.419194	2.21813	0.0265458	0.243903
LOC285501	5.66674	-3.45081	1.55612	-2.21757	0.0265841	0.244124
LOC728431	18.9565	1.97733	0.891848	2.21712	0.0266151	0.244166
CKB	1044.86	1.81048	0.816604	2.21709	0.0266172	0.244166
COQ3	40.3173	-1.48799	0.671331	-2.21647	0.0266592	0.244421
RHCG	7.05102	3.55321	1.60337	2.21609	0.0266857	0.2445
NANOS2	14.3843	-3.0522	1.37746	-2.21583	0.0267034	0.2445
CEACAM19	65.6039	2.91777	1.31685	2.21572	0.0267105	0.2445
PICK1	206.136	1.7066	0.770421	2.21516	0.0267493	0.244724
MTVR2	18.4981	-3.51573	1.58752	-2.2146	0.0267875	0.244943
AAMDC	43.8671	1.84213	0.832136	2.21374	0.0268466	0.245316
KSR2	3.1216	3.55791	1.6073	2.21359	0.0268569	0.245316
BMS1P6	11.4651	-2.20749	0.997723	-2.21253	0.0269304	0.245802
PAQR4	262.191	-1.55475	0.702741	-2.2124	0.0269388	0.245802
FIGN	81.3809	-2.49486	1.12791	-2.21194	0.0269711	0.245966
THYN1	118.34	-1.42766	0.645529	-2.21161	0.0269935	0.24604
EXOSC2	193.776	1.19054	0.538612	2.21038	0.0270787	0.246577
RPS15A	3448.26	-1.38203	0.625332	-2.21007	0.0271003	0.246577
RBM23	84.1559	1.46108	0.661156	2.20988	0.0271134	0.246577
KIAA0753	35.7137	1.60139	0.724714	2.20968	0.0271274	0.246577
ATP1B2	4.03099	3.89931	1.76477	2.20953	0.027138	0.246577
CXCL5	126.366	2.72237	1.23222	2.20932	0.0271524	0.246577
RALGAPA1	81.3648	1.6452	0.744667	2.20931	0.0271531	0.246577
SNRNP70	155.13	1.20666	0.546406	2.20837	0.0272186	0.247041
NMRAL1	95.6835	0.986702	0.446904	2.20786	0.0272537	0.247133
SPSB4	6.38748	-2.75469	1.24774	-2.20774	0.0272625	0.247133
SLC9A3	80.6099	3.01732	1.36679	2.2076	0.0272719	0.247133
VPS51	181.771	1.24038	0.56209	2.20672	0.0273334	0.247559
TOB1-AS1	3.35252	3.68586	1.67077	2.20608	0.0273786	0.247686
UNC45A	165.287	1.42713	0.647006	2.20574	0.0274019	0.247686
OR52I1	383.657	-2.57362	1.16683	-2.20566	0.0274077	0.247686
MAGEA2B	62.224	-2.8947	1.31254	-2.20542	0.0274247	0.247686
TFAP2E	4.44242	3.98394	1.8066	2.20522	0.0274389	0.247686
USP38	26.9025	-1.38542	0.628353	-2.20485	0.0274647	0.247686
DCAF7	75.4762	1.14544	0.519529	2.20476	0.0274709	0.247686
RNF19B	106.28	1.11627	0.506348	2.20455	0.0274857	0.247686
C7orf50	49.5707	1.43404	0.650545	2.20437	0.0274983	0.247686
KRTAP10-11	16.1792	-3.18507	1.44513	-2.20401	0.0275238	0.247686
OR10Q1	16.6939	-2.99392	1.35845	-2.20393	0.0275292	0.247686
MCMDC2	37.4132	-2.5711	1.1666	-2.20392	0.0275296	0.247686
CTNNBL1	136.461	1.10914	0.503276	2.20385	0.0275351	0.247686
PCDHB5	5.484	3.10992	1.4116	2.20312	0.0275863	0.247928
F2RL1	115.529	-1.09615	0.497561	-2.20306	0.0275909	0.247928
ZNF326	79.4936	-1.2353	0.560906	-2.20234	0.0276414	0.248252
DHFR	179.178	-1.72245	0.78249	-2.20124	0.0277189	0.248673
GUCY1B3	19.0724	2.12812	0.966917	2.20093	0.0277409	0.248673
LGALS12	4.05174	-2.73573	1.24316	-2.20063	0.027762	0.248673
FREM1	70.5454	2.36004	1.07244	2.20062	0.0277628	0.248673
SSX7	4.21917	-3.27791	1.48978	-2.20027	0.0277877	0.248673
CISH	149.2	1.13341	0.51513	2.20025	0.0277894	0.248673
C3orf30	6.39504	-2.97624	1.35269	-2.20024	0.0277898	0.248673
SPARC	3351.07	2.14439	0.974868	2.19967	0.02783	0.248903
LCN9	1.68496	-4.34279	1.97487	-2.19903	0.0278761	0.249185
CCDC15	16.3095	2.43285	1.10669	2.19831	0.0279268	0.249388
CHORDC1	366.059	-1.29296	0.588164	-2.1983	0.0279279	0.249388
OR2V2	2.34284	-3.35635	1.52723	-2.19767	0.0279725	0.249656
PTGS2	37.4175	2.27919	1.03729	2.19726	0.0280022	0.249756
DENND2A	29.5529	2.38292	1.08465	2.19694	0.0280246	0.249756
PGRMC2	192.979	1.82623	0.831277	2.1969	0.0280273	0.249756
BCRP2	4.17959	-2.6608	1.21167	-2.19597	0.0280942	0.249784
SLC6A20	96.6376	2.54547	1.15933	2.19564	0.028118	0.249784
MT1B	6.99354	-3.30986	1.5075	-2.19559	0.0281215	0.249784
LOC100129924	4.16589	-3.61471	1.64642	-2.19549	0.0281283	0.249784
SSX6	4.56777	-3.65381	1.66425	-2.19547	0.0281296	0.249784
SNTA1	45.6374	-1.55943	0.710296	-2.19546	0.0281304	0.249784
C16orf59	23.7666	2.04055	0.929476	2.19538	0.0281366	0.249784
LOC440970	6.59826	-3.09436	1.40958	-2.19523	0.0281469	0.249784
LUC7L3	728.018	1.56966	0.715124	2.19495	0.0281672	0.249835
VCX	2.32426	-3.6171	1.64886	-2.1937	0.0282568	0.250375
AKR1C3	137.923	-1.55158	0.70729	-2.1937	0.0282573	0.250375
GALP	4.83951	-3.41938	1.55914	-2.19311	0.0282992	0.250468
MON1B	79.7045	1.04051	0.474466	2.19302	0.0283062	0.250468
C1orf112	107.67	-1.1023	0.502657	-2.19294	0.0283116	0.250468
MS4A2	5.74277	3.58473	1.63504	2.19244	0.0283476	0.250657
LOC641515	8.38765	-2.8713	1.30997	-2.19189	0.0283876	0.250882
TTC23L	2.06497	-5.49551	2.50826	-2.19096	0.0284544	0.251191
ADAM3A	2.40532	-4.12163	1.88124	-2.19091	0.0284583	0.251191
MRPS11	155.104	-1.08353	0.494583	-2.1908	0.0284666	0.251191
MKRN2	43.3223	1.6681	0.761617	2.19021	0.0285088	0.251411
ASCC3	155.085	1.28104	0.584937	2.19005	0.0285208	0.251411
STAG2	108.834	-0.967835	0.442114	-2.18911	0.028589	0.251796
NEK6	9.65148	-1.69357	0.773658	-2.18904	0.0285939	0.251796
LZTS2	86.8608	0.936311	0.427845	2.18843	0.0286381	0.252056
TBC1D12	69.0191	1.65107	0.754523	2.18823	0.028653	0.252058
SNORA31	42535.1	-2.0151	0.920993	-2.18797	0.028672	0.252096
CAMK2N2	17.2892	-3.28459	1.50141	-2.18767	0.0286935	0.252156
TRIM51HP	3.03218	-3.83315	1.75266	-2.18705	0.028739	0.252426
EID2	64.1112	1.44621	0.661888	2.18497	0.0288908	0.25363
ZIC1	12.4975	-3.28811	1.50512	-2.18461	0.0289172	0.253635
DCLRE1B	73.9881	-1.04894	0.480158	-2.18456	0.0289209	0.253635
PRR16	3.29216	-3.36561	1.54084	-2.18427	0.0289423	0.253692
USP21	57.0209	1.56875	0.718386	2.18371	0.0289835	0.253768
CYP2E1	21.0533	1.96337	0.899248	2.18335	0.0290103	0.253768
AQP9	28.2927	2.31999	1.06261	2.1833	0.0290138	0.253768
TGFB3	74.2732	-1.48132	0.678489	-2.18326	0.0290169	0.253768
ARRDC3-AS1	26.2911	-2.683	1.22896	-2.18315	0.0290249	0.253768
ZNF222	51.2418	-2.13025	0.975929	-2.1828	0.0290509	0.253866
ANKRD40	375.097	1.19929	0.549496	2.18252	0.029071	0.253912
PLA2G6	24.0016	2.09487	0.960193	2.18172	0.0291305	0.254111
MRPL36	531.01	-1.39403	0.638966	-2.1817	0.0291319	0.254111
DRAP1	811.999	1.08643	0.497994	2.18161	0.0291382	0.254111
SIL1	36.9813	2.1029	0.964321	2.1807	0.0292053	0.254567
LYPLA1	5409.98	-1.28509	0.589412	-2.1803	0.0292353	0.254699
RGS4	3.64905	-2.83163	1.29893	-2.17998	0.0292593	0.254779
SRPK3	4.49911	4.02241	1.84576	2.17927	0.0293116	0.255102
TRPV4	47.1603	-1.33368	0.612041	-2.17907	0.0293261	0.255102
CCNA1	5.13763	-3.06618	1.40775	-2.17807	0.029401	0.255442
C5orf38	9.1946	-3.17733	1.45891	-2.17788	0.0294152	0.255442
BPTF	450.332	-1.04252	0.478707	-2.17779	0.0294218	0.255442
COL6A1	1200.86	1.27401	0.585014	2.17775	0.0294248	0.255442
LUC7L	380.892	1.16325	0.534226	2.17745	0.0294467	0.255494
LBX2-AS1	50.0555	1.55095	0.712345	2.17724	0.0294627	0.255494
OR5AR1	13.883	-2.70615	1.24304	-2.17703	0.029478	0.255494
OR8B2	7.64559	-3.81955	1.75461	-2.17687	0.0294904	0.255494
LEKR1	1.46115	-3.87694	1.78106	-2.17676	0.0294983	NA
TACC2	117.711	1.84747	0.848887	2.17634	0.0295296	0.255705
NRIP1	340.758	-1.04948	0.482336	-2.17583	0.029568	0.255908
TMEM167A	901.778	-0.998062	0.458789	-2.17543	0.029598	0.255942
RBP2	31.7712	3.80472	1.74906	2.17529	0.0296084	0.255942
[truncated: 702 more rows]
