# Supplementary material for: Transcriptomic Changes Associated with ERBB2 Overexpression in Colorectal Cancer Implicate a Potential Role of the Wnt Signaling Pathway in Tumorigenesis
Source: Cancers (Basel). 2022 Dec 26;15(1):130. doi: 10.3390/cancers15010130 (PMC9817785; doi:10.3390/cancers15010130)
Supplement: Supplementary file 1 [file cancers-15-00130-s001.zip › Revised_Supplementary Table S4_GSEA detailed output.xlsx]

## Sheet: CRC Patients
GS	SIZE	SOURCE	ES	NES	NOM p-val	FDR q-val	FWER p-val	Tag %	Gene %	Signal	FDR (median)	glob.p.val	Gene sets collection
GSE12963_ENV_NEF_VS_ENV_NEF_AND_VPR_DEFICIENT_HIV1_INF_CD4_TCELL_DN	16	http://www.gsea-msigdb.org/gsea/msigdb/cards/GSE12963_ENV_NEF_VS_ENV_NEF_AND_VPR_DEFICIENT_HIV1_INF_CD4_TCELL_DN	0.66373	2.3395	0	0	0	0.75	0.232	0.58	0	0	C7
GSE17974_IL4_AND_ANTI_IL12_VS_UNTREATED_0.5H_ACT_CD4_TCELL_DN	18	http://www.gsea-msigdb.org/gsea/msigdb/cards/GSE17974_IL4_AND_ANTI_IL12_VS_UNTREATED_0.5H_ACT_CD4_TCELL_DN	0.52558	1.909	0	0.73546	0.305	0.444	0.13	0.389	0	0.192	C7
GSE35685_CD34POS_CD38NEG_VS_CD34POS_CD10NEG_CD62LPOS_BONE_MARROW_DN	28	http://www.gsea-msigdb.org/gsea/msigdb/cards/GSE35685_CD34POS_CD38NEG_VS_CD34POS_CD10NEG_CD62LPOS_BONE_MARROW_DN	0.51633	1.8961	0	0.6012	0.339	0.571	0.282	0.414	0	0.147	C7
GSE16385_UNTREATED_VS_12H_ROSIGLITAZONE_TREATED_MACROPHAGE_DN	17	http://www.gsea-msigdb.org/gsea/msigdb/cards/GSE16385_UNTREATED_VS_12H_ROSIGLITAZONE_TREATED_MACROPHAGE_DN	0.58757	1.8687	0	0.61008	0.384	0.471	0.127	0.413	0	0.174	C7
GSE6875_TCONV_VS_TREG_DN	26	http://www.gsea-msigdb.org/gsea/msigdb/cards/GSE6875_TCONV_VS_TREG_DN	0.46093	1.6918	0	1	0.628	0.462	0.211	0.368	0.83272	0.471	C7
GSE43700_UNTREATED_VS_IL10_TREATED_PBMC_UP	22	http://www.gsea-msigdb.org/gsea/msigdb/cards/GSE43700_UNTREATED_VS_IL10_TREATED_PBMC_UP	0.48356	1.6654	0	1	0.643	0.5	0.288	0.359	0.85057	0.474	C7
GSE7509_UNSTIM_VS_TNFA_IL1B_IL6_PGE_STIM_DC_DN	16	http://www.gsea-msigdb.org/gsea/msigdb/cards/GSE7509_UNSTIM_VS_TNFA_IL1B_IL6_PGE_STIM_DC_DN	0.54478	1.6514	0	1	0.646	0.562	0.223	0.44	0.7218	0.448	C7
GSE15330_HSC_VS_GRANULOCYTE_MONOCYTE_PROGENITOR_UP	19	http://www.gsea-msigdb.org/gsea/msigdb/cards/GSE15330_HSC_VS_GRANULOCYTE_MONOCYTE_PROGENITOR_UP	0.50125	1.655	0.002227	1	0.646	0.579	0.325	0.393	0.83285	0.475	C7
GSE25088_WT_VS_STAT6_KO_MACROPHAGE_ROSIGLITAZONE_AND_IL4_STIM_UP	20	http://www.gsea-msigdb.org/gsea/msigdb/cards/GSE25088_WT_VS_STAT6_KO_MACROPHAGE_ROSIGLITAZONE_AND_IL4_STIM_UP	0.47997	1.6523	0.002299	1	0.646	0.7	0.426	0.405	0.77336	0.461	C7
GSE17721_PAM3CSK4_VS_CPG_16H_BMDC_DN	20	http://www.gsea-msigdb.org/gsea/msigdb/cards/GSE17721_PAM3CSK4_VS_CPG_16H_BMDC_DN	0.45969	1.5947	0.005319	1	0.686	0.5	0.274	0.366	0.7954	0.476	C7
GSE3691_CONVENTIONAL_VS_PLASMACYTOID_DC_SPLEEN_DN	27	http://www.gsea-msigdb.org/gsea/msigdb/cards/GSE3691_CONVENTIONAL_VS_PLASMACYTOID_DC_SPLEEN_DN	0.42345	1.597	0.006173	1	0.685	0.778	0.488	0.402	0.80782	0.486	C7
GSE18281_CORTICAL_THYMOCYTE_VS_WHOLE_CORTEX_THYMUS_UP	26	http://www.gsea-msigdb.org/gsea/msigdb/cards/GSE18281_CORTICAL_THYMOCYTE_VS_WHOLE_CORTEX_THYMUS_UP	0.50135	1.7503	0.006343	1	0.559	0.423	0.13	0.372	0.45509	0.389	C7
GSE17186_MEMORY_VS_NAIVE_BCELL_DN	19	http://www.gsea-msigdb.org/gsea/msigdb/cards/GSE17186_MEMORY_VS_NAIVE_BCELL_DN	0.61441	1.6788	0.006356	1	0.633	0.579	0.182	0.477	0.87598	0.475	C7
GSE9006_TYPE_1_DIABETES_AT_DX_VS_4MONTH_POST_DX_PBMC_DN	25	http://www.gsea-msigdb.org/gsea/msigdb/cards/GSE9006_TYPE_1_DIABETES_AT_DX_VS_4MONTH_POST_DX_PBMC_DN	0.48856	1.6076	0.006438	1	0.677	0.6	0.399	0.364	0.93112	0.49	C7
GSE30971_WBP7_HET_VS_KO_MACROPHAGE_UP	17	http://www.gsea-msigdb.org/gsea/msigdb/cards/GSE30971_WBP7_HET_VS_KO_MACROPHAGE_UP	0.51754	1.6046	0.00655	1	0.677	0.353	0.127	0.31	0.86289	0.49	C7
GSE32986_GMCSF_AND_CURDLAN_LOWDOSE_VS_GMCSF_AND_CURDLAN_HIGHDOSE_STIM_DC_DN	23	http://www.gsea-msigdb.org/gsea/msigdb/cards/GSE32986_GMCSF_AND_CURDLAN_LOWDOSE_VS_GMCSF_AND_CURDLAN_HIGHDOSE_STIM_DC_DN	0.46065	1.6414	0.007026	1	0.646	0.435	0.168	0.365	0.72156	0.467	C7
GSE339_CD8POS_VS_CD4CD8DN_DC_UP	20	http://www.gsea-msigdb.org/gsea/msigdb/cards/GSE339_CD8POS_VS_CD4CD8DN_DC_UP	0.44776	1.5586	0.007092	1	0.739	0.35	0.142	0.302	0.83932	0.469	C7
GSE411_UNSTIM_VS_400MIN_IL6_STIM_MACROPHAGE_UP	23	http://www.gsea-msigdb.org/gsea/msigdb/cards/GSE411_UNSTIM_VS_400MIN_IL6_STIM_MACROPHAGE_UP	0.57983	1.7551	0.008333	1	0.559	0.435	0.146	0.375	0.51701	0.425	C7
GSE3203_INFLUENZA_INF_VS_IFNB_TREATED_LN_BCELL_UP	25	http://www.gsea-msigdb.org/gsea/msigdb/cards/GSE3203_INFLUENZA_INF_VS_IFNB_TREATED_LN_BCELL_UP	0.44121	1.5993	0.008721	1	0.681	0.76	0.457	0.416	0.84295	0.489	C7
GSE39022_LN_VS_SPLEEN_DC_UP	19	http://www.gsea-msigdb.org/gsea/msigdb/cards/GSE39022_LN_VS_SPLEEN_DC_UP	0.53179	1.6277	0.009546	1	0.659	0.632	0.317	0.435	0.85062	0.466	C7
GSE15659_NONSUPPRESSIVE_TCELL_VS_ACTIVATED_TREG_UP	30	http://www.gsea-msigdb.org/gsea/msigdb/cards/GSE15659_NONSUPPRESSIVE_TCELL_VS_ACTIVATED_TREG_UP	0.45884	1.7067	0.01013	1	0.614	0.533	0.248	0.406	0.79644	0.467	C7
GSE43957_UNTREATED_VS_NACL_TREATED_ANTI_CD3_CD28_STIM_CD4_TCELL_UP	30	http://www.gsea-msigdb.org/gsea/msigdb/cards/GSE43957_UNTREATED_VS_NACL_TREATED_ANTI_CD3_CD28_STIM_CD4_TCELL_UP	0.4431	1.5547	0.01106	1	0.75	0.667	0.409	0.398	0.85163	0.478	C7
GSE11057_NAIVE_VS_MEMORY_CD4_TCELL_UP	22	http://www.gsea-msigdb.org/gsea/msigdb/cards/GSE11057_NAIVE_VS_MEMORY_CD4_TCELL_UP	0.43425	1.6576	0.01205	1	0.646	0.727	0.498	0.368	0.89062	0.477	C7
GSE2770_TGFB_AND_IL4_VS_IL4_TREATED_ACT_CD4_TCELL_2H_UP	27	http://www.gsea-msigdb.org/gsea/msigdb/cards/GSE2770_TGFB_AND_IL4_VS_IL4_TREATED_ACT_CD4_TCELL_2H_UP	0.44174	1.5257	0.01211	1	0.782	0.63	0.384	0.392	0.99547	0.498	C7
GSE15659_RESTING_VS_ACTIVATED_TREG_UP	26	http://www.gsea-msigdb.org/gsea/msigdb/cards/GSE15659_RESTING_VS_ACTIVATED_TREG_UP	0.38777	1.5164	0.01216	1	0.79	0.615	0.394	0.376	0.92884	0.482	C7
GSE26351_WNT_VS_BMP_PATHWAY_STIM_HEMATOPOIETIC_PROGENITORS_UP	27	http://www.gsea-msigdb.org/gsea/msigdb/cards/GSE26351_WNT_VS_BMP_PATHWAY_STIM_HEMATOPOIETIC_PROGENITORS_UP	0.46925	1.579	0.01295	1	0.699	0.63	0.396	0.384	0.85003	0.483	C7
GSE21927_SPLEEN_VS_TUMOR_MONOCYTE_C57BL6_UP	30	http://www.gsea-msigdb.org/gsea/msigdb/cards/GSE21927_SPLEEN_VS_TUMOR_MONOCYTE_C57BL6_UP	0.4504	1.6778	0.01306	1	0.639	0.6	0.322	0.411	0.85634	0.467	C7
GSE15624_CTRL_VS_6H_HALOFUGINONE_TREATED_CD4_TCELL_DN	26	http://www.gsea-msigdb.org/gsea/msigdb/cards/GSE15624_CTRL_VS_6H_HALOFUGINONE_TREATED_CD4_TCELL_DN	0.49551	1.4309	0.01431	1	0.823	0.538	0.304	0.378	0.99067	0.5	C7
GSE37605_TREG_VS_TCONV_C57BL6_FOXP3_IRES_GFP_UP	17	http://www.gsea-msigdb.org/gsea/msigdb/cards/GSE37605_TREG_VS_TCONV_C57BL6_FOXP3_IRES_GFP_UP	0.44449	1.5035	0.01437	1	0.793	0.706	0.409	0.42	0.91706	0.48	C7
GSE360_CTRL_VS_L_MAJOR_DC_UP	16	http://www.gsea-msigdb.org/gsea/msigdb/cards/GSE360_CTRL_VS_L_MAJOR_DC_UP	0.56958	1.5424	0.0161	1	0.76	0.5	0.144	0.431	0.93855	0.485	C7
GSE15930_STIM_VS_STIM_AND_IFNAB_72H_CD8_T_CELL_UP	26	http://www.gsea-msigdb.org/gsea/msigdb/cards/GSE15930_STIM_VS_STIM_AND_IFNAB_72H_CD8_T_CELL_UP	0.40625	1.4356	0.01657	1	0.823	0.462	0.273	0.339	0.97933	0.496	C7
GSE17721_POLYIC_VS_PAM3CSK4_1H_BMDC_UP	25	http://www.gsea-msigdb.org/gsea/msigdb/cards/GSE17721_POLYIC_VS_PAM3CSK4_1H_BMDC_UP	0.49455	1.5688	0.01953	1	0.709	0.44	0.259	0.329	0.85172	0.469	C7
GSE17721_POLYIC_VS_GARDIQUIMOD_0.5H_BMDC_UP	24	http://www.gsea-msigdb.org/gsea/msigdb/cards/GSE17721_POLYIC_VS_GARDIQUIMOD_0.5H_BMDC_UP	0.47629	1.4802	0.02013	1	0.8	0.375	0.138	0.326	1	0.505	C7
GSE28737_BCL6_HET_VS_BCL6_KO_MARGINAL_ZONE_BCELL_UP	27	http://www.gsea-msigdb.org/gsea/msigdb/cards/GSE28737_BCL6_HET_VS_BCL6_KO_MARGINAL_ZONE_BCELL_UP	0.45684	1.5788	0.02022	1	0.703	0.556	0.28	0.404	0.8217	0.468	C7
GSE17721_CPG_VS_GARDIQUIMOD_2H_BMDC_UP	21	http://www.gsea-msigdb.org/gsea/msigdb/cards/GSE17721_CPG_VS_GARDIQUIMOD_2H_BMDC_UP	0.48919	1.6056	0.02103	1	0.677	0.81	0.487	0.419	0.90604	0.49	C7
GSE7509_UNSTIM_VS_FCGRIIB_STIM_DC_UP	22	http://www.gsea-msigdb.org/gsea/msigdb/cards/GSE7509_UNSTIM_VS_FCGRIIB_STIM_DC_UP	0.48209	1.5959	0.02103	1	0.685	0.545	0.28	0.396	0.77551	0.474	C7
GSE15330_HSC_VS_GRANULOCYTE_MONOCYTE_PROGENITOR_IKAROS_KO_UP	19	http://www.gsea-msigdb.org/gsea/msigdb/cards/GSE15330_HSC_VS_GRANULOCYTE_MONOCYTE_PROGENITOR_IKAROS_KO_UP	0.47285	1.6017	0.02155	1	0.677	0.421	0.188	0.344	0.85297	0.488	C7
GSE37534_UNTREATED_VS_ROSIGLITAZONE_TREATED_CD4_TCELL_PPARG1_AND_FOXP3_TRASDUCED_UP	34	http://www.gsea-msigdb.org/gsea/msigdb/cards/GSE37534_UNTREATED_VS_ROSIGLITAZONE_TREATED_CD4_TCELL_PPARG1_AND_FOXP3_TRASDUCED_UP	0.36357	1.4181	0.02529	1	0.827	0.765	0.548	0.35	0.95276	0.49	C7
GSE26030_UNSTIM_VS_RESTIM_TH17_DAY15_POST_POLARIZATION_DN	16	http://www.gsea-msigdb.org/gsea/msigdb/cards/GSE26030_UNSTIM_VS_RESTIM_TH17_DAY15_POST_POLARIZATION_DN	0.55917	1.593	0.02534	1	0.693	0.562	0.26	0.419	0.80914	0.473	C7
GSE30153_LUPUS_VS_HEALTHY_DONOR_BCELL_DN	26	http://www.gsea-msigdb.org/gsea/msigdb/cards/GSE30153_LUPUS_VS_HEALTHY_DONOR_BCELL_DN	0.4097	1.4007	0.02557	1	0.834	0.423	0.171	0.354	0.94022	0.479	C7
GSE14769_40MIN_VS_360MIN_LPS_BMDM_UP	24	http://www.gsea-msigdb.org/gsea/msigdb/cards/GSE14769_40MIN_VS_360MIN_LPS_BMDM_UP	0.56864	1.4622	0.02761	1	0.802	0.542	0.3	0.383	1	0.509	C7
GSE22886_NAIVE_CD8_TCELL_VS_DC_UP	24	http://www.gsea-msigdb.org/gsea/msigdb/cards/GSE22886_NAIVE_CD8_TCELL_VS_DC_UP	0.47417	1.5686	0.02772	1	0.709	0.583	0.332	0.393	0.82591	0.465	C7
GSE8921_UNSTIM_VS_TLR1_2_STIM_MONOCYTE_6H_DN	24	http://www.gsea-msigdb.org/gsea/msigdb/cards/GSE8921_UNSTIM_VS_TLR1_2_STIM_MONOCYTE_6H_DN	0.47605	1.4498	0.02872	1	0.807	0.667	0.35	0.438	1	0.502	C7
GSE36826_NORMAL_VS_STAPH_AUREUS_INF_IL1R_KO_SKIN_UP	21	http://www.gsea-msigdb.org/gsea/msigdb/cards/GSE36826_NORMAL_VS_STAPH_AUREUS_INF_IL1R_KO_SKIN_UP	0.5229	1.453	0.02964	1	0.807	0.714	0.405	0.429	1	0.503	C7
GSE36392_TYPE_2_MYELOID_VS_MAC_IL25_TREATED_LUNG_DN	28	http://www.gsea-msigdb.org/gsea/msigdb/cards/GSE36392_TYPE_2_MYELOID_VS_MAC_IL25_TREATED_LUNG_DN	0.52352	1.4925	0.02998	1	0.795	0.536	0.324	0.366	0.98324	0.496	C7
GSE2706_LPS_VS_R848_AND_LPS_2H_STIM_DC_DN	18	http://www.gsea-msigdb.org/gsea/msigdb/cards/GSE2706_LPS_VS_R848_AND_LPS_2H_STIM_DC_DN	0.44311	1.4921	0.03069	1	0.795	0.444	0.201	0.357	0.96629	0.493	C7
GSE10147_IL3_VS_IL3_AND_HIVP17_STIM_PDC_DN	20	http://www.gsea-msigdb.org/gsea/msigdb/cards/GSE10147_IL3_VS_IL3_AND_HIVP17_STIM_PDC_DN	0.40129	1.4765	0.03096	1	0.8	0.9	0.543	0.415	1	0.506	C7
GSE10147_IL3_VS_IL3_AND_CPG_STIM_PDC_DN	18	http://www.gsea-msigdb.org/gsea/msigdb/cards/GSE10147_IL3_VS_IL3_AND_CPG_STIM_PDC_DN	0.53648	1.5054	0.03178	1	0.793	0.556	0.241	0.424	0.90746	0.479	C7
GSE34156_TLR1_TLR2_LIGAND_VS_NOD2_AND_TLR1_TLR2_LIGAND_6H_TREATED_MONOCYTE_DN	16	http://www.gsea-msigdb.org/gsea/msigdb/cards/GSE34156_TLR1_TLR2_LIGAND_VS_NOD2_AND_TLR1_TLR2_LIGAND_6H_TREATED_MONOCYTE_DN	0.52078	1.5638	0.03182	1	0.725	0.438	0.18	0.361	0.84413	0.47	C7
GSE17186_NAIVE_VS_CD21LOW_TRANSITIONAL_BCELL_UP	17	http://www.gsea-msigdb.org/gsea/msigdb/cards/GSE17186_NAIVE_VS_CD21LOW_TRANSITIONAL_BCELL_UP	0.57655	1.4877	0.032	1	0.797	0.412	0.15	0.352	1	0.503	C7
GSE36009_UNSTIM_VS_LPS_STIM_NLRP10_KO_DC_UP	21	http://www.gsea-msigdb.org/gsea/msigdb/cards/GSE36009_UNSTIM_VS_LPS_STIM_NLRP10_KO_DC_UP	0.52355	1.4718	0.03238	1	0.8	0.667	0.33	0.45	1	0.512	C7
GSE17301_ACD3_ACD28_VS_ACD3_ACD28_AND_IFNA5_STIM_CD8_TCELL_UP	15	http://www.gsea-msigdb.org/gsea/msigdb/cards/GSE17301_ACD3_ACD28_VS_ACD3_ACD28_AND_IFNA5_STIM_CD8_TCELL_UP	0.55931	1.444	0.0324	1	0.814	0.533	0.249	0.403	1	0.5	C7
GSE5542_UNTREATED_VS_IFNG_TREATED_EPITHELIAL_CELLS_24H_UP	24	http://www.gsea-msigdb.org/gsea/msigdb/cards/GSE5542_UNTREATED_VS_IFNG_TREATED_EPITHELIAL_CELLS_24H_UP	0.56425	1.5257	0.03272	1	0.782	0.667	0.33	0.451	0.97284	0.492	C7
GSE29618_PRE_VS_DAY7_FLU_VACCINE_PDC_UP	30	http://www.gsea-msigdb.org/gsea/msigdb/cards/GSE29618_PRE_VS_DAY7_FLU_VACCINE_PDC_UP	0.38517	1.4253	0.03342	1	0.827	0.633	0.375	0.4	0.98382	0.497	C7
GSE28408_LY6G_POS_VS_NEG_DC_DN	17	http://www.gsea-msigdb.org/gsea/msigdb/cards/GSE28408_LY6G_POS_VS_NEG_DC_DN	0.48396	1.4652	0.03356	1	0.801	0.529	0.34	0.351	1	0.516	C7
GSE17974_IL4_AND_ANTI_IL12_VS_UNTREATED_12H_ACT_CD4_TCELL_DN	31	http://www.gsea-msigdb.org/gsea/msigdb/cards/GSE17974_IL4_AND_ANTI_IL12_VS_UNTREATED_12H_ACT_CD4_TCELL_DN	0.40712	1.5618	0.03385	1	0.732	0.548	0.312	0.382	0.84937	0.471	C7
GSE3982_MAST_CELL_VS_NKCELL_DN	25	http://www.gsea-msigdb.org/gsea/msigdb/cards/GSE3982_MAST_CELL_VS_NKCELL_DN	0.42148	1.4406	0.035	1	0.814	0.56	0.332	0.378	1	0.501	C7
GSE411_WT_VS_SOCS3_KO_MACROPHAGE_IL6_STIM_100MIN_DN	24	http://www.gsea-msigdb.org/gsea/msigdb/cards/GSE411_WT_VS_SOCS3_KO_MACROPHAGE_IL6_STIM_100MIN_DN	0.50768	1.4537	0.03538	1	0.807	0.458	0.215	0.363	1	0.507	C7
GSE11961_FOLLICULAR_BCELL_VS_MEMORY_BCELL_DAY40_UP	22	http://www.gsea-msigdb.org/gsea/msigdb/cards/GSE11961_FOLLICULAR_BCELL_VS_MEMORY_BCELL_DAY40_UP	0.50292	1.5819	0.03625	1	0.695	0.682	0.328	0.462	0.84777	0.474	C7
GSE41176_UNSTIM_VS_ANTI_IGM_STIM_TAK1_KO_BCELL_6H_UP	24	http://www.gsea-msigdb.org/gsea/msigdb/cards/GSE41176_UNSTIM_VS_ANTI_IGM_STIM_TAK1_KO_BCELL_6H_UP	0.44737	1.5093	0.03636	1	0.791	0.292	0.139	0.253	0.93306	0.475	C7
GSE4748_LPS_VS_LPS_AND_CYANOBACTERIUM_LPSLIKE_STIM_DC_3H_DN	22	http://www.gsea-msigdb.org/gsea/msigdb/cards/GSE4748_LPS_VS_LPS_AND_CYANOBACTERIUM_LPSLIKE_STIM_DC_3H_DN	0.41851	1.4652	0.03774	1	0.801	0.591	0.379	0.37	1	0.509	C7
GSE5589_LPS_VS_LPS_AND_IL10_STIM_MACROPHAGE_45MIN_UP	21	http://www.gsea-msigdb.org/gsea/msigdb/cards/GSE5589_LPS_VS_LPS_AND_IL10_STIM_MACROPHAGE_45MIN_UP	0.49249	1.4864	0.03846	1	0.797	0.619	0.337	0.414	1	0.502	C7
GSE5542_UNTREATED_VS_IFNA_AND_IFNG_TREATED_EPITHELIAL_CELLS_6H_UP	25	http://www.gsea-msigdb.org/gsea/msigdb/cards/GSE5542_UNTREATED_VS_IFNA_AND_IFNG_TREATED_EPITHELIAL_CELLS_6H_UP	0.43579	1.444	0.04065	1	0.814	0.44	0.22	0.346	0.99118	0.5	C7
GSE339_CD4POS_VS_CD4CD8DN_DC_UP	26	http://www.gsea-msigdb.org/gsea/msigdb/cards/GSE339_CD4POS_VS_CD4CD8DN_DC_UP	0.41538	1.4588	0.0411	1	0.804	0.5	0.288	0.36	1	0.505	C7
GSE3920_UNTREATED_VS_IFNG_TREATED_FIBROBLAST_DN	26	http://www.gsea-msigdb.org/gsea/msigdb/cards/GSE3920_UNTREATED_VS_IFNG_TREATED_FIBROBLAST_DN	0.41736	1.4491	0.04215	1	0.811	0.538	0.387	0.334	0.99303	0.497	C7
GSE3720_UNSTIM_VS_LPS_STIM_VD1_GAMMADELTA_TCELL_DN	15	http://www.gsea-msigdb.org/gsea/msigdb/cards/GSE3720_UNSTIM_VS_LPS_STIM_VD1_GAMMADELTA_TCELL_DN	0.50941	1.3573	0.04375	1	0.866	0.8	0.457	0.437	0.85297	0.472	C7
GSE8835_HEALTHY_VS_CLL_CD4_TCELL_UP	20	http://www.gsea-msigdb.org/gsea/msigdb/cards/GSE8835_HEALTHY_VS_CLL_CD4_TCELL_UP	0.43435	1.4713	0.04489	1	0.8	0.65	0.402	0.392	1	0.509	C7
GSE26928_NAIVE_VS_CENT_MEMORY_CD4_TCELL_DN	16	http://www.gsea-msigdb.org/gsea/msigdb/cards/GSE26928_NAIVE_VS_CENT_MEMORY_CD4_TCELL_DN	0.57184	1.4841	0.04508	1	0.797	0.812	0.348	0.533	0.99499	0.499	C7
GSE17721_LPS_VS_GARDIQUIMOD_6H_BMDC_DN	17	http://www.gsea-msigdb.org/gsea/msigdb/cards/GSE17721_LPS_VS_GARDIQUIMOD_6H_BMDC_DN	0.55312	1.5208	0.04618	1	0.79	0.647	0.365	0.414	0.9586	0.483	C7
GSE16385_ROSIGLITAZONE_VS_UNTREATED_IFNG_TNF_STIM_MACROPHAGE_DN	39	http://www.gsea-msigdb.org/gsea/msigdb/cards/GSE16385_ROSIGLITAZONE_VS_UNTREATED_IFNG_TNF_STIM_MACROPHAGE_DN	0.4515	1.4036	0.04721	1	0.834	0.564	0.334	0.381	0.95842	0.479	C7
GSE34156_UNTREATED_VS_24H_NOD2_AND_TLR1_TLR2_LIGAND_TREATED_MONOCYTE_DN	25	http://www.gsea-msigdb.org/gsea/msigdb/cards/GSE34156_UNTREATED_VS_24H_NOD2_AND_TLR1_TLR2_LIGAND_TREATED_MONOCYTE_DN	0.53741	1.5764	0.04816	1	0.703	0.52	0.18	0.431	0.81016	0.465	C7
GSE13173_UNTREATED_VS_IL12_TREATED_ACT_CD8_TCELL_UP	15	http://www.gsea-msigdb.org/gsea/msigdb/cards/GSE13173_UNTREATED_VS_IL12_TREATED_ACT_CD8_TCELL_UP	0.48898	1.5196	0.04819	1	0.79	0.467	0.201	0.375	0.94617	0.483	C7
GSE45365_CD8A_DC_VS_CD11B_DC_IFNAR_KO_MCMV_INFECTION_UP	17	http://www.gsea-msigdb.org/gsea/msigdb/cards/GSE45365_CD8A_DC_VS_CD11B_DC_IFNAR_KO_MCMV_INFECTION_UP	0.50011	1.4465	0.04861	1	0.811	0.588	0.282	0.425	0.99112	0.5	C7
MYC_UP.V1_UP	24	http://www.broadinstitute.org/gsea/msigdb/cards/MYC_UP.V1_UP	0.48814	1.6908	0	0.6134	0.2392	0.667	0.392	0.409	0	0.239	C6
CTIP_DN.V1_DN	19	http://www.broadinstitute.org/gsea/msigdb/cards/CTIP_DN.V1_DN	0.40845	1.5802	0.008043	0.644	0.4585	0.263	0.0541	0.251	0	0.278	C6
NOTCH_DN.V1_UP	23	http://www.broadinstitute.org/gsea/msigdb/cards/NOTCH_DN.V1_UP	0.43248	1.5406	0.03448	0.71345	0.5145	0.739	0.449	0.411	0.32069	0.287	C6
KRAS.600.LUNG.BREAST_UP.V1_DN	34	http://www.broadinstitute.org/gsea/msigdb/cards/KRAS.600.LUNG.BREAST_UP.V1_DN	0.33441	1.3308	0.03873	1	0.6887	0.794	0.568	0.348	1	0.552	C6
ESC_V6.5_UP_EARLY.V1_UP	24	http://www.broadinstitute.org/gsea/msigdb/cards/ESC_V6.5_UP_EARLY.V1_UP	0.45211	1.6871	0.04251	0.31856	0.2462	0.583	0.382	0.364	0	0.144	C6
GO_SPECIFICATION_OF_SYMMETRY	21	http://www.gsea-msigdb.org/gsea/msigdb/cards/GO_SPECIFICATION_OF_SYMMETRY	0.52367	1.7205	0.006742	1	0.428	0.619	0.258	0.463	0	0.428	C5
GO_RESPONSE_TO_METAL_ION	43	http://www.gsea-msigdb.org/gsea/msigdb/cards/GO_RESPONSE_TO_METAL_ION	0.39711	1.5137	0.007092	1	0.659	0.488	0.308	0.343	1	0.589	C5
GO_RESPONSE_TO_BMP	19	http://www.gsea-msigdb.org/gsea/msigdb/cards/GO_RESPONSE_TO_BMP	0.46386	1.671	0.01047	1	0.501	0.316	0.0963	0.287	0.20722	0.34	C5
GO_CELLULAR_COMPONENT_ASSEMBLY_INVOLVED_IN_MORPHOGENESIS	16	http://www.gsea-msigdb.org/gsea/msigdb/cards/GO_CELLULAR_COMPONENT_ASSEMBLY_INVOLVED_IN_MORPHOGENESIS	0.52385	1.7083	0.01244	1	0.451	0.625	0.311	0.433	0	0.285	C5
GO_RESPONSE_TO_CALCIUM_ION	19	http://www.gsea-msigdb.org/gsea/msigdb/cards/GO_RESPONSE_TO_CALCIUM_ION	0.51326	1.6169	0.01754	1	0.559	0.526	0.231	0.408	0.56157	0.413	C5
GO_CANONICAL_WNT_SIGNALING_PATHWAY	47	http://www.gsea-msigdb.org/gsea/msigdb/cards/GO_CANONICAL_WNT_SIGNALING_PATHWAY	0.37687	1.478	0.01828	1	0.709	0.532	0.415	0.316	1	0.575	C5
GO_STEM_CELL_DIFFERENTIATION	37	http://www.gsea-msigdb.org/gsea/msigdb/cards/GO_STEM_CELL_DIFFERENTIATION	0.49366	1.711	0.01877	1	0.445	0.459	0.268	0.341	0	0.387	C5
GO_CELL_MATURATION	19	http://www.gsea-msigdb.org/gsea/msigdb/cards/GO_CELL_MATURATION	0.4894	1.4954	0.02552	1	0.688	0.632	0.39	0.388	1	0.566	C5
GO_REGULATION_OF_STEM_CELL_DIFFERENTIATION	21	http://www.gsea-msigdb.org/gsea/msigdb/cards/GO_REGULATION_OF_STEM_CELL_DIFFERENTIATION	0.57195	1.7104	0.03081	1	0.445	0.524	0.268	0.386	0	0.341	C5
GO_NEGATIVE_REGULATION_OF_WNT_SIGNALING_PATHWAY	29	http://www.gsea-msigdb.org/gsea/msigdb/cards/GO_NEGATIVE_REGULATION_OF_WNT_SIGNALING_PATHWAY	0.38574	1.3922	0.04762	1	0.786	0.276	0.136	0.241	1	0.607	C5
GO_NEGATIVE_REGULATION_OF_CELL_DIFFERENTIATION	79	http://www.gsea-msigdb.org/gsea/msigdb/cards/GO_NEGATIVE_REGULATION_OF_CELL_DIFFERENTIATION	0.31267	1.374	0.04972	1	0.796	0.38	0.286	0.279	1	0.625	C5
MIKKELSEN_MCV6_HCP_WITH_H3K27ME3	50	http://www.gsea-msigdb.org/gsea/msigdb/cards/MIKKELSEN_MCV6_HCP_WITH_H3K27ME3	0.44343	1.6763	0	1	0.541	0.54	0.267	0.403	1	0.541	C2
KIM_RESPONSE_TO_TSA_AND_DECITABINE_UP	17	http://www.gsea-msigdb.org/gsea/msigdb/cards/KIM_RESPONSE_TO_TSA_AND_DECITABINE_UP	0.42292	1.462	0	1	0.755	0.471	0.252	0.354	1	0.68	C2
MIKKELSEN_MEF_HCP_WITH_H3K27ME3	83	http://www.gsea-msigdb.org/gsea/msigdb/cards/MIKKELSEN_MEF_HCP_WITH_H3K27ME3	0.33665	1.4756	0.0124	1	0.743	0.53	0.368	0.346	1	0.706	C2
REACTOME_POST_TRANSLATIONAL_MODIFICATION:_SYNTHESIS_OF_GPI_ANCHORED_PROTEINS	15	http://www.gsea-msigdb.org/gsea/msigdb/cards/REACTOME_POST_TRANSLATIONAL_MODIFICATION:_SYNTHESIS_OF_GPI_ANCHORED_PROTEINS	0.51209	1.6246	0.02439	1	0.604	0.533	0.286	0.383	1	0.577	C2
GAUSSMANN_MLL_AF4_FUSION_TARGETS_A_UP	15	http://www.gsea-msigdb.org/gsea/msigdb/cards/GAUSSMANN_MLL_AF4_FUSION_TARGETS_A_UP	0.51133	1.5754	0.03059	1	0.637	0.467	0.176	0.387	1	0.6	C2
IWANAGA_CARCINOGENESIS_BY_KRAS_UP	21	http://www.gsea-msigdb.org/gsea/msigdb/cards/IWANAGA_CARCINOGENESIS_BY_KRAS_UP	0.43521	1.4445	0.03426	1	0.756	0.429	0.198	0.347	1	0.66	C2
CAIRO_LIVER_DEVELOPMENT_DN	23	http://www.gsea-msigdb.org/gsea/msigdb/cards/CAIRO_LIVER_DEVELOPMENT_DN	0.47598	1.5167	0.03795	1	0.693	0.609	0.344	0.403	1	0.662	C2
PASINI_SUZ12_TARGETS_UP	15	http://www.gsea-msigdb.org/gsea/msigdb/cards/PASINI_SUZ12_TARGETS_UP	0.42068	1.4733	0.03937	1	0.747	0.467	0.276	0.34	1	0.692	C2
DOANE_RESPONSE_TO_ANDROGEN_UP	25	http://www.gsea-msigdb.org/gsea/msigdb/cards/DOANE_RESPONSE_TO_ANDROGEN_UP	0.43651	1.4809	0.04265	1	0.737	0.64	0.365	0.41	1	0.71	C2

## Sheet: CRC Cell lines
GS	SIZE	SOURCE	ES	NES	NOM p-val	FDR q-val	FWER p-val	Tag %	Gene %	Signal	FDR (median)	glob.p.val	Collection gene sets	CRC Cell line
ZWANG_TRANSIENTLY_UP_BY_2ND_EGF_PULSE_ONLY	58	http://www.gsea-msigdb.org/gsea/msigdb/cards/ZWANG_TRANSIENTLY_UP_BY_2ND_EGF_PULSE_ONLY	0.54083	2.0233	0	1	0.047	0.414	0.207	0.344	0	0.047	C2	HT29
KEGG_FOCAL_ADHESION	27	http://www.gsea-msigdb.org/gsea/msigdb/cards/KEGG_FOCAL_ADHESION	0.54951	1.8866	0	1	0.161	0.296	0.175	0.25	0	0.047	C2	HT29
BENPORATH_ES_WITH_H3K27ME3	35	http://www.gsea-msigdb.org/gsea/msigdb/cards/BENPORATH_ES_WITH_H3K27ME3	0.59716	1.8298	0	0.86017	0.27	0.714	0.307	0.509	0	0.102	C2	HT29
KAAB_HEART_ATRIUM_VS_VENTRICLE_UP	26	http://www.gsea-msigdb.org/gsea/msigdb/cards/KAAB_HEART_ATRIUM_VS_VENTRICLE_UP	0.5552	1.829	0	0.72493	0.27	0.654	0.335	0.444	0	0.102	C2	HT29
BENPORATH_SUZ12_TARGETS	38	http://www.gsea-msigdb.org/gsea/msigdb/cards/BENPORATH_SUZ12_TARGETS	0.54874	1.8114	0	0.51363	0.27	0.711	0.345	0.479	0	0.102	C2	HT29
SMID_BREAST_CANCER_BASAL_DN	56	http://www.gsea-msigdb.org/gsea/msigdb/cards/SMID_BREAST_CANCER_BASAL_DN	0.39225	1.7733	0	0.50728	0.32	0.464	0.325	0.328	0	0.102	C2	HT29
LIU_PROSTATE_CANCER_DN	37	http://www.gsea-msigdb.org/gsea/msigdb/cards/LIU_PROSTATE_CANCER_DN	0.54459	1.7508	0	0.33494	0.32	0.541	0.26	0.412	0	0.047	C2	HT29
FOSTER_KDM1A_TARGETS_UP	16	http://www.gsea-msigdb.org/gsea/msigdb/cards/FOSTER_KDM1A_TARGETS_UP	0.55022	1.7446	0	0.32065	0.32	0.75	0.33	0.508	0	0.047	C2	HT29
BRUINS_UVC_RESPONSE_VIA_TP53_GROUP_A	45	http://www.gsea-msigdb.org/gsea/msigdb/cards/BRUINS_UVC_RESPONSE_VIA_TP53_GROUP_A	0.43364	1.6875	0	0.33159	0.387	0.4	0.3	0.29	0	0.047	C2	HT29
HAN_SATB1_TARGETS_UP	49	http://www.gsea-msigdb.org/gsea/msigdb/cards/HAN_SATB1_TARGETS_UP	0.45312	1.6784	0	0.32692	0.387	0.429	0.309	0.308	0	0.102	C2	HT29
GOZGIT_ESR1_TARGETS_DN	69	http://www.gsea-msigdb.org/gsea/msigdb/cards/GOZGIT_ESR1_TARGETS_DN	0.42569	1.6679	0	0.34047	0.387	0.435	0.268	0.336	0	0.102	C2	HT29
CAIRO_HEPATOBLASTOMA_CLASSES_DN	15	http://www.gsea-msigdb.org/gsea/msigdb/cards/CAIRO_HEPATOBLASTOMA_CLASSES_DN	0.51391	1.6408	0	0.33278	0.441	0.667	0.327	0.454	0	0.102	C2	HT29
CHANDRAN_METASTASIS_DN	26	http://www.gsea-msigdb.org/gsea/msigdb/cards/CHANDRAN_METASTASIS_DN	0.49694	1.6139	0	0.31125	0.441	0.615	0.32	0.427	0	0.102	C2	HT29
MEISSNER_NPC_HCP_WITH_H3_UNMETHYLATED	23	http://www.gsea-msigdb.org/gsea/msigdb/cards/MEISSNER_NPC_HCP_WITH_H3_UNMETHYLATED	0.47566	1.5862	0	0.32667	0.5	0.696	0.415	0.414	0.022061	0.102	C2	HT29
SCHUETZ_BREAST_CANCER_DUCTAL_INVASIVE_UP	20	http://www.gsea-msigdb.org/gsea/msigdb/cards/SCHUETZ_BREAST_CANCER_DUCTAL_INVASIVE_UP	0.4941	1.5652	0	0.33198	0.542	0.5	0.279	0.366	0.055901	0.102	C2	HT29
YAGI_AML_WITH_11Q23_REARRANGED	30	http://www.gsea-msigdb.org/gsea/msigdb/cards/YAGI_AML_WITH_11Q23_REARRANGED	0.45373	1.5414	0	0.33081	0.542	0.333	0.185	0.278	0.063522	0.102	C2	HT29
SARRIO_EPITHELIAL_MESENCHYMAL_TRANSITION_DN	22	http://www.gsea-msigdb.org/gsea/msigdb/cards/SARRIO_EPITHELIAL_MESENCHYMAL_TRANSITION_DN	0.46115	1.4604	0	0.37675	0.577	0.636	0.321	0.439	0.09248	0.102	C2	HT29
WEST_ADRENOCORTICAL_TUMOR_DN	55	http://www.gsea-msigdb.org/gsea/msigdb/cards/WEST_ADRENOCORTICAL_TUMOR_DN	0.41871	1.3844	0	0.40677	0.668	0.6	0.406	0.372	0.19636	0.102	C2	HT29
WIERENGA_STAT5A_TARGETS_UP	25	http://www.gsea-msigdb.org/gsea/msigdb/cards/WIERENGA_STAT5A_TARGETS_UP	0.38702	1.3561	0	0.44403	0.731	0.48	0.356	0.315	0.17416	0.102	C2	HT29
ACEVEDO_LIVER_CANCER_DN	47	http://www.gsea-msigdb.org/gsea/msigdb/cards/ACEVEDO_LIVER_CANCER_DN	0.34819	1.294	0	0.5268	0.826	0.447	0.348	0.302	0.21204	0.151	C2	HT29
WANG_SMARCE1_TARGETS_UP	30	http://www.gsea-msigdb.org/gsea/msigdb/cards/WANG_SMARCE1_TARGETS_UP	0.29962	1.2754	0	0.53518	0.865	0.4	0.335	0.272	0.19459	0.277	C2	HT29
GO_REGULATION_OF_CELLULAR_COMPONENT_MOVEMENT	76	http://www.gsea-msigdb.org/gsea/msigdb/cards/GO_REGULATION_OF_CELLULAR_COMPONENT_MOVEMENT	0.49264	1.8654	0	0.22012	0.164	0.382	0.245	0.306	0	0.047	C5-BP	HT29
GO_MONOVALENT_INORGANIC_CATION_TRANSPORT	23	http://www.gsea-msigdb.org/gsea/msigdb/cards/GO_MONOVALENT_INORGANIC_CATION_TRANSPORT	0.4707	1.8284	0	0.198	0.214	0.348	0.244	0.268	0	0.047	C5-BP	HT29
GO_REGULATION_OF_ION_TRANSPORT	35	http://www.gsea-msigdb.org/gsea/msigdb/cards/GO_REGULATION_OF_ION_TRANSPORT	0.40109	1.7198	0	0.24491	0.256	0.286	0.225	0.228	0	0.047	C5-BP	HT29
GO_MUSCLE_CONTRACTION	19	http://www.gsea-msigdb.org/gsea/msigdb/cards/GO_MUSCLE_CONTRACTION	0.56663	1.7169	0	0.23618	0.256	0.474	0.225	0.373	0	0.047	C5-BP	HT29
GO_CATION_TRANSPORT	53	http://www.gsea-msigdb.org/gsea/msigdb/cards/GO_CATION_TRANSPORT	0.37563	1.6988	0	0.23716	0.256	0.283	0.225	0.229	0	0.047	C5-BP	HT29
GO_REGULATION_OF_ION_TRANSMEMBRANE_TRANSPORT	25	http://www.gsea-msigdb.org/gsea/msigdb/cards/GO_REGULATION_OF_ION_TRANSMEMBRANE_TRANSPORT	0.40257	1.6436	0	0.27644	0.434	0.28	0.225	0.221	0	0.102	C5-BP	HT29
GO_NEGATIVE_REGULATION_OF_CELL_POPULATION_PROLIFERATION	47	http://www.gsea-msigdb.org/gsea/msigdb/cards/GO_NEGATIVE_REGULATION_OF_CELL_POPULATION_PROLIFERATION	0.40075	1.6205	0	0.26974	0.469	0.468	0.323	0.329	0	0.102	C5-BP	HT29
GO_REGULATION_OF_CELL_POPULATION_PROLIFERATION	119	http://www.gsea-msigdb.org/gsea/msigdb/cards/GO_REGULATION_OF_CELL_POPULATION_PROLIFERATION	0.36321	1.6159	0	0.26228	0.469	0.403	0.323	0.301	0	0.102	C5-BP	HT29
GO_CATION_TRANSMEMBRANE_TRANSPORT	38	http://www.gsea-msigdb.org/gsea/msigdb/cards/GO_CATION_TRANSMEMBRANE_TRANSPORT	0.35913	1.5971	0	0.26312	0.523	0.289	0.244	0.226	0.02152	0.102	C5-BP	HT29
GO_CELL_MOTILITY	116	http://www.gsea-msigdb.org/gsea/msigdb/cards/GO_CELL_MOTILITY	0.40787	1.5845	0	0.25057	0.523	0.328	0.245	0.272	0.019584	0.102	C5-BP	HT29
GO_ION_TRANSPORT	88	http://www.gsea-msigdb.org/gsea/msigdb/cards/GO_ION_TRANSPORT	0.32039	1.5795	0	0.2426	0.523	0.284	0.272	0.222	0.018816	0.102	C5-BP	HT29
GO_POSITIVE_REGULATION_OF_CELL_POPULATION_PROLIFERATION	71	http://www.gsea-msigdb.org/gsea/msigdb/cards/GO_POSITIVE_REGULATION_OF_CELL_POPULATION_PROLIFERATION	0.36875	1.5345	0	0.27867	0.577	0.38	0.31	0.278	0.033671	0.102	C5-BP	HT29
GO_RESPONSE_TO_CALCIUM_ION	18	http://www.gsea-msigdb.org/gsea/msigdb/cards/GO_RESPONSE_TO_CALCIUM_ION	0.52738	1.508	0	0.26519	0.577	0.722	0.396	0.443	0.028412	0.102	C5-BP	HT29
GO_CELL_CELL_SIGNALING	92	http://www.gsea-msigdb.org/gsea/msigdb/cards/GO_CELL_CELL_SIGNALING	0.35397	1.5074	0	0.26235	0.577	0.283	0.227	0.235	0.028012	0.102	C5-BP	HT29
GO_CELLULAR_RESPONSE_TO_INORGANIC_SUBSTANCE	23	http://www.gsea-msigdb.org/gsea/msigdb/cards/GO_CELLULAR_RESPONSE_TO_INORGANIC_SUBSTANCE	0.54631	1.4999	0	0.25498	0.577	0.522	0.27	0.388	0.03788	0.102	C5-BP	HT29
GO_LEUKOCYTE_MIGRATION	26	http://www.gsea-msigdb.org/gsea/msigdb/cards/GO_LEUKOCYTE_MIGRATION	0.47181	1.4942	0	0.25818	0.577	0.615	0.392	0.382	0.037388	0.102	C5-BP	HT29
GO_LOCOMOTION	134	http://www.gsea-msigdb.org/gsea/msigdb/cards/GO_LOCOMOTION	0.38307	1.4717	0	0.26641	0.617	0.313	0.245	0.264	0.067801	0.109	C5-BP	HT29
GO_EPITHELIUM_DEVELOPMENT	97	http://www.gsea-msigdb.org/gsea/msigdb/cards/GO_EPITHELIUM_DEVELOPMENT	0.36663	1.4211	0	0.30749	0.617	0.371	0.309	0.277	0.10451	0.164	C5-BP	HT29
GO_RESPONSE_TO_WOUNDING	58	http://www.gsea-msigdb.org/gsea/msigdb/cards/GO_RESPONSE_TO_WOUNDING	0.3812	1.4158	0	0.30472	0.617	0.586	0.454	0.335	0.1015	0.102	C5-BP	HT29
GO_ACTIN_FILAMENT_BASED_PROCESS	58	http://www.gsea-msigdb.org/gsea/msigdb/cards/GO_ACTIN_FILAMENT_BASED_PROCESS	0.40766	1.3933	0	0.32836	0.617	0.31	0.237	0.248	0.13487	0.102	C5-BP	HT29
GO_NEGATIVE_REGULATION_OF_LOCOMOTION	25	http://www.gsea-msigdb.org/gsea/msigdb/cards/GO_NEGATIVE_REGULATION_OF_LOCOMOTION	0.42023	1.3929	0	0.32653	0.617	0.52	0.378	0.33	0.13365	0.102	C5-BP	HT29
GO_BEHAVIOR	42	http://www.gsea-msigdb.org/gsea/msigdb/cards/GO_BEHAVIOR	0.34715	1.3793	0	0.33619	0.617	0.357	0.325	0.249	0.15644	0.164	C5-BP	HT29
GO_REGULATION_OF_OSSIFICATION	15	http://www.gsea-msigdb.org/gsea/msigdb/cards/GO_REGULATION_OF_OSSIFICATION	0.47177	1.3494	0	0.35942	0.617	0.6	0.311	0.418	0.16752	0.164	C5-BP	HT29
GO_LIPID_LOCALIZATION	30	http://www.gsea-msigdb.org/gsea/msigdb/cards/GO_LIPID_LOCALIZATION	0.32306	1.347	0	0.35769	0.617	0.533	0.464	0.293	0.16375	0.164	C5-BP	HT29
GO_PHOSPHOLIPID_BINDING	29	http://www.gsea-msigdb.org/gsea/msigdb/cards/GO_PHOSPHOLIPID_BINDING	0.48364	1.775	0	0.22853	0.164	0.448	0.274	0.333	0	0.102	C5-MF	HT29
GO_LIPID_BINDING	47	http://www.gsea-msigdb.org/gsea/msigdb/cards/GO_LIPID_BINDING	0.46689	1.7588	0	0.18252	0.164	0.468	0.293	0.343	0	0.102	C5-MF	HT29
GSE17721_LPS_VS_GARDIQUIMOD_6H_BMDC_UP	23	http://www.gsea-msigdb.org/gsea/msigdb/cards/GSE17721_LPS_VS_GARDIQUIMOD_6H_BMDC_UP	0.33572	1.1739	0	0.77334	0.868	0.478	0.396	0.294	0.52702	0.435	C7	HT29
GSE5679_CTRL_VS_PPARG_LIGAND_ROSIGLITAZONE_AND_RARA_AGONIST_AM580_TREATED_DC_DN	19	http://www.gsea-msigdb.org/gsea/msigdb/cards/GSE5679_CTRL_VS_PPARG_LIGAND_ROSIGLITAZONE_AND_RARA_AGONIST_AM580_TREATED_DC_DN	0.3046	1.2175	0	0.71881	0.826	0.737	0.555	0.333	0.49506	0.373	C7	HT29
GSE22103_UNSTIM_VS_GMCSF_AND_IFNG_STIM_NEUTROPHIL_DN	18	http://www.gsea-msigdb.org/gsea/msigdb/cards/GSE22103_UNSTIM_VS_GMCSF_AND_IFNG_STIM_NEUTROPHIL_DN	0.34498	1.2711	0	0.62743	0.779	0.722	0.542	0.336	0.42418	0.319	C7	HT29
GSE36888_UNTREATED_VS_IL2_TREATED_STAT5_AB_KNOCKIN_TCELL_17H_UP	18	http://www.gsea-msigdb.org/gsea/msigdb/cards/GSE36888_UNTREATED_VS_IL2_TREATED_STAT5_AB_KNOCKIN_TCELL_17H_UP	0.42114	1.2958	0	0.60514	0.779	0.278	0.222	0.219	0.40382	0.277	C7	HT29
GSE35825_UNTREATED_VS_IFNG_STIM_MACROPHAGE_UP	23	http://www.gsea-msigdb.org/gsea/msigdb/cards/GSE35825_UNTREATED_VS_IFNG_STIM_MACROPHAGE_UP	0.42004	1.3082	0	0.59425	0.779	0.435	0.325	0.299	0.38832	0.21	C7	HT29
GSE15930_STIM_VS_STIM_AND_TRICHOSTATINA_72H_CD8_T_CELL_DN	21	http://www.gsea-msigdb.org/gsea/msigdb/cards/GSE15930_STIM_VS_STIM_AND_TRICHOSTATINA_72H_CD8_T_CELL_DN	0.39546	1.312	0	0.59172	0.779	0.429	0.285	0.312	0.38871	0.21	C7	HT29
GSE33424_CD161_HIGH_VS_NEG_CD8_TCELL_UP	20	http://www.gsea-msigdb.org/gsea/msigdb/cards/GSE33424_CD161_HIGH_VS_NEG_CD8_TCELL_UP	0.48124	1.3287	0	0.58087	0.779	0.4	0.238	0.31	0.38694	0.156	C7	HT29
GSE36392_TYPE_2_MYELOID_VS_NEUTROPHIL_IL25_TREATED_LUNG_UP	20	http://www.gsea-msigdb.org/gsea/msigdb/cards/GSE36392_TYPE_2_MYELOID_VS_NEUTROPHIL_IL25_TREATED_LUNG_UP	0.41142	1.3528	0	0.56588	0.779	0.35	0.3	0.249	0.37629	0.218	C7	HT29
GSE13229_MATURE_VS_INTMATURE_NKCELL_UP	15	http://www.gsea-msigdb.org/gsea/msigdb/cards/GSE13229_MATURE_VS_INTMATURE_NKCELL_UP	0.43134	1.3667	0	0.54337	0.716	0.667	0.416	0.394	0.3478	0.097	C7	HT29
GSE23505_UNTREATED_VS_4DAY_IL6_IL1_IL23_TREATED_CD4_TCELL_UP	22	http://www.gsea-msigdb.org/gsea/msigdb/cards/GSE23505_UNTREATED_VS_4DAY_IL6_IL1_IL23_TREATED_CD4_TCELL_UP	0.41398	1.3824	0	0.52694	0.716	0.5	0.344	0.333	0.32091	0.097	C7	HT29
GSE7768_OVA_ALONE_VS_OVA_WITH_MPL_IMMUNIZED_MOUSE_WHOLE_SPLEEN_6H_DN	15	http://www.gsea-msigdb.org/gsea/msigdb/cards/GSE7768_OVA_ALONE_VS_OVA_WITH_MPL_IMMUNIZED_MOUSE_WHOLE_SPLEEN_6H_DN	0.41443	1.3895	0	0.52451	0.716	0.6	0.403	0.363	0.32719	0.097	C7	HT29
GSE10239_NAIVE_VS_MEMORY_CD8_TCELL_DN	15	http://www.gsea-msigdb.org/gsea/msigdb/cards/GSE10239_NAIVE_VS_MEMORY_CD8_TCELL_DN	0.49683	1.4395	0	0.4791	0.665	0.733	0.395	0.449	0.30092	0.097	C7	HT29
GSE22935_UNSTIM_VS_48H_MBOVIS_BCG_STIM_MYD88_KO_MACROPHAGE_UP	15	http://www.gsea-msigdb.org/gsea/msigdb/cards/GSE22935_UNSTIM_VS_48H_MBOVIS_BCG_STIM_MYD88_KO_MACROPHAGE_UP	0.47545	1.4515	0	0.47496	0.665	0.6	0.327	0.408	0.27348	0.097	C7	HT29
GSE26343_UNSTIM_VS_LPS_STIM_NFAT5_KO_MACROPHAGE_UP	21	http://www.gsea-msigdb.org/gsea/msigdb/cards/GSE26343_UNSTIM_VS_LPS_STIM_NFAT5_KO_MACROPHAGE_UP	0.46187	1.453	0	0.47274	0.665	0.381	0.279	0.279	0.2695	0.097	C7	HT29
GSE360_L_MAJOR_VS_M_TUBERCULOSIS_DC_DN	20	http://www.gsea-msigdb.org/gsea/msigdb/cards/GSE360_L_MAJOR_VS_M_TUBERCULOSIS_DC_DN	0.47986	1.4641	0	0.45849	0.617	0.65	0.396	0.399	0.23596	0.097	C7	HT29
GSE17721_4_VS_24H_CPG_BMDC_UP	16	http://www.gsea-msigdb.org/gsea/msigdb/cards/GSE17721_4_VS_24H_CPG_BMDC_UP	0.51177	1.4717	0	0.46462	0.617	0.688	0.35	0.453	0.23033	0.097	C7	HT29
GSE21670_UNTREATED_VS_TGFB_TREATED_CD4_TCELL_DN	22	http://www.gsea-msigdb.org/gsea/msigdb/cards/GSE21670_UNTREATED_VS_TGFB_TREATED_CD4_TCELL_DN	0.41602	1.4736	0	0.4664	0.617	0.773	0.479	0.409	0.23357	0.097	C7	HT29
GSE14769_UNSTIM_VS_360MIN_LPS_BMDM_DN	19	http://www.gsea-msigdb.org/gsea/msigdb/cards/GSE14769_UNSTIM_VS_360MIN_LPS_BMDM_DN	0.45813	1.4737	0	0.46909	0.617	0.474	0.32	0.327	0.23523	0.097	C7	HT29
GSE5589_LPS_VS_LPS_AND_IL10_STIM_IL10_KO_MACROPHAGE_180MIN_UP	16	http://www.gsea-msigdb.org/gsea/msigdb/cards/GSE5589_LPS_VS_LPS_AND_IL10_STIM_IL10_KO_MACROPHAGE_180MIN_UP	0.42232	1.4794	0	0.46695	0.617	0.438	0.317	0.303	0.20718	0.097	C7	HT29
GSE9037_CTRL_VS_LPS_1H_STIM_IRAK4_KO_BMDM_UP	16	http://www.gsea-msigdb.org/gsea/msigdb/cards/GSE9037_CTRL_VS_LPS_1H_STIM_IRAK4_KO_BMDM_UP	0.34204	1.4828	0	0.45891	0.617	0.5	0.344	0.332	0.19664	0.097	C7	HT29
GSE46606_IRF4HIGH_VS_IRF4MID_CD40L_IL2_IL5_DAY1_STIMULATED_BCELL_DN	16	http://www.gsea-msigdb.org/gsea/msigdb/cards/GSE46606_IRF4HIGH_VS_IRF4MID_CD40L_IL2_IL5_DAY1_STIMULATED_BCELL_DN	0.45344	1.4837	0	0.45865	0.617	0.562	0.335	0.379	0.19526	0.097	C7	HT29
GSE3039_NKT_CELL_VS_B2_BCELL_DN	28	http://www.gsea-msigdb.org/gsea/msigdb/cards/GSE3039_NKT_CELL_VS_B2_BCELL_DN	0.42194	1.491	0	0.46654	0.617	0.393	0.3	0.281	0.18477	0.097	C7	HT29
GSE17721_CTRL_VS_CPG_8H_BMDC_DN	17	http://www.gsea-msigdb.org/gsea/msigdb/cards/GSE17721_CTRL_VS_CPG_8H_BMDC_DN	0.45531	1.5007	0	0.4696	0.617	0.353	0.18	0.293	0.16279	0.097	C7	HT29
GSE42021_TCONV_PLN_VS_TREG_PRECURSORS_THYMUS_UP	19	http://www.gsea-msigdb.org/gsea/msigdb/cards/GSE42021_TCONV_PLN_VS_TREG_PRECURSORS_THYMUS_UP	0.46994	1.5119	0	0.47338	0.617	0.474	0.353	0.311	0.14868	0.097	C7	HT29
GSE10240_IL17_VS_IL17_AND_IL22_STIM_PRIMARY_BRONCHIAL_EPITHELIAL_CELLS_DN	16	http://www.gsea-msigdb.org/gsea/msigdb/cards/GSE10240_IL17_VS_IL17_AND_IL22_STIM_PRIMARY_BRONCHIAL_EPITHELIAL_CELLS_DN	0.50559	1.5248	0	0.47651	0.617	0.375	0.227	0.294	0.13842	0.097	C7	HT29
GSE2770_UNTREATED_VS_TGFB_AND_IL12_TREATED_ACT_CD4_TCELL_48H_DN	15	http://www.gsea-msigdb.org/gsea/msigdb/cards/GSE2770_UNTREATED_VS_TGFB_AND_IL12_TREATED_ACT_CD4_TCELL_48H_DN	0.41016	1.5285	0	0.46836	0.617	0.4	0.258	0.3	0.12673	0.097	C7	HT29
GSE22229_UNTREATED_VS_IMMUNOSUPP_THERAPY_RENAL_TRANSPLANT_PATIENT_PBMC_DN	20	http://www.gsea-msigdb.org/gsea/msigdb/cards/GSE22229_UNTREATED_VS_IMMUNOSUPP_THERAPY_RENAL_TRANSPLANT_PATIENT_PBMC_DN	0.4378	1.5396	0	0.47271	0.617	0.45	0.272	0.333	0.11942	0.097	C7	HT29
GSE36476_YOUNG_VS_OLD_DONOR_MEMORY_CD4_TCELL_72H_TSST_ACT_UP	16	http://www.gsea-msigdb.org/gsea/msigdb/cards/GSE36476_YOUNG_VS_OLD_DONOR_MEMORY_CD4_TCELL_72H_TSST_ACT_UP	0.4586	1.5507	0	0.47555	0.617	0.375	0.184	0.31	0.10711	0.097	C7	HT29
GSE360_DC_VS_MAC_T_GONDII_UP	15	http://www.gsea-msigdb.org/gsea/msigdb/cards/GSE360_DC_VS_MAC_T_GONDII_UP	0.48934	1.5588	0	0.49001	0.617	0.533	0.357	0.347	0.1049	0.097	C7	HT29
GSE15930_STIM_VS_STIM_AND_IL12_72H_CD8_T_CELL_UP	22	http://www.gsea-msigdb.org/gsea/msigdb/cards/GSE15930_STIM_VS_STIM_AND_IL12_72H_CD8_T_CELL_UP	0.44971	1.5599	0	0.49892	0.617	0.5	0.301	0.356	0.10752	0.159	C7	HT29
GSE24210_CTRL_VS_IL35_TREATED_TCONV_CD4_TCELL_UP	16	http://www.gsea-msigdb.org/gsea/msigdb/cards/GSE24210_CTRL_VS_IL35_TREATED_TCONV_CD4_TCELL_UP	0.50327	1.5621	0	0.51061	0.617	0.625	0.345	0.414	0.10598	0.097	C7	HT29
GSE43955_1H_VS_10H_ACT_CD4_TCELL_DN	19	http://www.gsea-msigdb.org/gsea/msigdb/cards/GSE43955_1H_VS_10H_ACT_CD4_TCELL_DN	0.47494	1.5881	0	0.54864	0.577	0.632	0.313	0.441	0.073099	0.097	C7	HT29
GSE1112_OT1_VS_HY_CD8AB_THYMOCYTE_RTOC_CULTURE_DN	20	http://www.gsea-msigdb.org/gsea/msigdb/cards/GSE1112_OT1_VS_HY_CD8AB_THYMOCYTE_RTOC_CULTURE_DN	0.41871	1.5949	0	0.54702	0.577	0.5	0.346	0.332	0.068157	0.097	C7	HT29
GSE19888_CTRL_VS_TCELL_MEMBRANES_ACT_MAST_CELL_PRETREAT_A3R_INH_UP	16	http://www.gsea-msigdb.org/gsea/msigdb/cards/GSE19888_CTRL_VS_TCELL_MEMBRANES_ACT_MAST_CELL_PRETREAT_A3R_INH_UP	0.52054	1.6066	0	0.55423	0.577	0.5	0.268	0.37	0.064716	0.097	C7	HT29
GSE22229_UNTREATED_VS_IMMUNOSUPP_THERAPY_RENAL_TRANSPLANT_PATIENT_PBMC_UP	17	http://www.gsea-msigdb.org/gsea/msigdb/cards/GSE22229_UNTREATED_VS_IMMUNOSUPP_THERAPY_RENAL_TRANSPLANT_PATIENT_PBMC_UP	0.47417	1.6313	0	0.53622	0.577	0.647	0.33	0.439	0.053338	0.097	C7	HT29
GSE5589_LPS_VS_LPS_AND_IL6_STIM_IL10_KO_MACROPHAGE_45MIN_UP	15	http://www.gsea-msigdb.org/gsea/msigdb/cards/GSE5589_LPS_VS_LPS_AND_IL6_STIM_IL10_KO_MACROPHAGE_45MIN_UP	0.52872	1.6381	0	0.58237	0.535	0.4	0.23	0.311	0.040251	0.159	C7	HT29
GSE40273_XBP1_KO_VS_WT_TREG_DN	18	http://www.gsea-msigdb.org/gsea/msigdb/cards/GSE40273_XBP1_KO_VS_WT_TREG_DN	0.53176	1.642	0	0.59948	0.535	0.611	0.342	0.408	0.042168	0.097	C7	HT29
GSE7568_CTRL_VS_24H_TGFB_TREATED_MACROPHAGES_WITH_IL4_AND_DEXAMETHASONE_DN	16	http://www.gsea-msigdb.org/gsea/msigdb/cards/GSE7568_CTRL_VS_24H_TGFB_TREATED_MACROPHAGES_WITH_IL4_AND_DEXAMETHASONE_DN	0.62185	1.6695	0	0.73083	0.5	0.688	0.258	0.517	0.03041	0.159	C7	HT29
GSE19198_CTRL_VS_IL21_TREATED_TCELL_24H_UP	23	http://www.gsea-msigdb.org/gsea/msigdb/cards/GSE19198_CTRL_VS_IL21_TREATED_TCELL_24H_UP	0.58382	1.7309	0	0.95801	0.446	0.652	0.292	0.47	0	0.097	C7	HT29
GSE21360_NAIVE_VS_PRIMARY_MEMORY_CD8_TCELL_UP	19	http://www.gsea-msigdb.org/gsea/msigdb/cards/GSE21360_NAIVE_VS_PRIMARY_MEMORY_CD8_TCELL_UP	0.55059	1.7381	0	0.98772	0.446	0.474	0.24	0.366	0	0.097	C7	HT29
GSE45365_HEALTHY_VS_MCMV_INFECTION_CD8A_DC_UP	16	http://www.gsea-msigdb.org/gsea/msigdb/cards/GSE45365_HEALTHY_VS_MCMV_INFECTION_CD8A_DC_UP	-0.45954	-1.5024	0	1	0.599	1	0.547	0.459	1	0.537	C7	HT29
GSE46606_DAY1_VS_DAY3_CD40L_IL2_IL5_STIMULATED_IRF4MID_BCELL_DN	15	http://www.gsea-msigdb.org/gsea/msigdb/cards/GSE46606_DAY1_VS_DAY3_CD40L_IL2_IL5_STIMULATED_IRF4MID_BCELL_DN	-0.56201	-1.4988	0	1	0.599	1	0.445	0.561	1	0.537	C7	HT29
BAKKER_FOXO3_TARGETS_DN	21	http://www.gsea-msigdb.org/gsea/msigdb/cards/BAKKER_FOXO3_TARGETS_DN	0.54564	1.7306	0	1	0.295	0.524	0.292	0.375	0	0.243	C2	HCT116
MONNIER_POSTRADIATION_TUMOR_ESCAPE_DN	44	http://www.gsea-msigdb.org/gsea/msigdb/cards/MONNIER_POSTRADIATION_TUMOR_ESCAPE_DN	0.4532	1.56	0	0.72602	0.5	0.614	0.405	0.375	0.038741	0.213	C2	HCT116
EPPERT_PROGENITOR	16	http://www.gsea-msigdb.org/gsea/msigdb/cards/EPPERT_PROGENITOR	0.50682	1.4975	0	0.73241	0.676	0.688	0.397	0.419	0.1851	0.151	C2	HCT116
MIKKELSEN_ES_ICP_WITH_H3K4ME3	43	http://www.gsea-msigdb.org/gsea/msigdb/cards/MIKKELSEN_ES_ICP_WITH_H3K4ME3	0.42335	1.4807	0	0.70809	0.676	0.674	0.505	0.342	0.18122	0.151	C2	HCT116
BROWNE_HCMV_INFECTION_18HR_DN	15	http://www.gsea-msigdb.org/gsea/msigdb/cards/BROWNE_HCMV_INFECTION_18HR_DN	-0.59021	-1.2116	0	1	0.778	1	0.415	0.59	1	0.778	C2	HCT116
KASLER_HDAC7_TARGETS_1_UP	27	http://www.gsea-msigdb.org/gsea/msigdb/cards/KASLER_HDAC7_TARGETS_1_UP	-0.61261	-1.1685	0	1	0.84	1	0.397	0.612	1	0.728	C2	HCT116
GO_ENDOPLASMIC_RETICULUM_TO_GOLGI_VESICLE_MEDIATED_TRANSPORT	19	http://www.gsea-msigdb.org/gsea/msigdb/cards/GO_ENDOPLASMIC_RETICULUM_TO_GOLGI_VESICLE_MEDIATED_TRANSPORT	0.57387	1.759	0	1	0.146	0.368	0.104	0.334	0	0.096	C5BP	HCT116
GO_GOLGI_VESICLE_TRANSPORT	43	http://www.gsea-msigdb.org/gsea/msigdb/cards/GO_GOLGI_VESICLE_TRANSPORT	0.45093	1.6507	0	1	0.248	0.326	0.129	0.291	0	0.248	C5BP	HCT116
GO_CELL_PROJECTION_ASSEMBLY	65	http://www.gsea-msigdb.org/gsea/msigdb/cards/GO_CELL_PROJECTION_ASSEMBLY	0.37259	1.3772	0	1	0.637	0.569	0.432	0.335	0.31674	0.325	C5BP	HCT116
GSE20727_CTRL_VS_DNFB_ALLERGEN_TREATED_DC_DN	16	http://www.gsea-msigdb.org/gsea/msigdb/cards/GSE20727_CTRL_VS_DNFB_ALLERGEN_TREATED_DC_DN	0.55331	1.9298	0	0.15132	0.101	0.688	0.335	0.461	0	0.05	C7	HCT116
GSE22886_CD8_VS_CD4_NAIVE_TCELL_DN	15	http://www.gsea-msigdb.org/gsea/msigdb/cards/GSE22886_CD8_VS_CD4_NAIVE_TCELL_DN	0.53849	1.7061	0	1	0.448	0.4	0.28	0.29	0	0.201	C7	HCT116
GSE21379_TFH_VS_NON_TFH_SAP_KO_CD4_TCELL_UP	15	http://www.gsea-msigdb.org/gsea/msigdb/cards/GSE21379_TFH_VS_NON_TFH_SAP_KO_CD4_TCELL_UP	0.51779	1.6511	0	1	0.496	0.533	0.233	0.413	0	0.201	C7	HCT116
GSE42021_CD24HI_VS_CD24LOW_TREG_THYMUS_DN	17	http://www.gsea-msigdb.org/gsea/msigdb/cards/GSE42021_CD24HI_VS_CD24LOW_TREG_THYMUS_DN	0.60279	1.4837	0	0.76598	0.696	0.471	0.131	0.413	0.17014	0.263	C7	HCT116
GSE21927_UNTREATED_VS_GMCSF_GCSF_TREATED_BONE_MARROW_UP	21	http://www.gsea-msigdb.org/gsea/msigdb/cards/GSE21927_UNTREATED_VS_GMCSF_GCSF_TREATED_BONE_MARROW_UP	0.47921	1.4629	0	0.74173	0.696	0.667	0.424	0.388	0.13988	0.263	C7	HCT116
GSE17721_CTRL_VS_GARDIQUIMOD_8H_BMDC_DN	19	http://www.gsea-msigdb.org/gsea/msigdb/cards/GSE17721_CTRL_VS_GARDIQUIMOD_8H_BMDC_DN	0.49887	1.4255	0	0.67689	0.696	0.684	0.395	0.418	0.14694	0.263	C7	HCT116

## Sheet: Normal Colon cell lines
GS	SIZE	SOURCE	ES	NES	NOM p-val	FDR q-val	FWER p-val	Tag %	Gene %	Signal	FDR (median)	glob.p.val	Collection gene sets	NC Cell line
DODD_NASOPHARYNGEAL_CARCINOMA_UP	20	http://www.gsea-msigdb.org/gsea/msigdb/cards/DODD_NASOPHARYNGEAL_CARCINOMA_UP	0.605	1.6793	0	0.36795	0.2427	0.2	0.0353	0.206	0	0.145	C2	CCD841
DOUGLAS_BMI1_TARGETS_UP	15	http://www.gsea-msigdb.org/gsea/msigdb/cards/DOUGLAS_BMI1_TARGETS_UP	0.48868	1.4745	0	0.51236	0.4162	0.4	0.301	0.294	0	0.16	C2	CCD841
GO_TRANSFERASE_ACTIVITY_TRANSFERRING_PHOSPHORUS_CONTAINING_GROUPS	15	http://www.gsea-msigdb.org/gsea/msigdb/cards/GO_TRANSFERASE_ACTIVITY_TRANSFERRING_PHOSPHORUS_CONTAINING_GROUPS	0.49028	1.7619	0	0	0	0.2	0.0513	0.199	0	0	C5-MF	CCD841
GO_ADENYL_NUCLEOTIDE_BINDING	17	http://www.gsea-msigdb.org/gsea/msigdb/cards/GO_ADENYL_NUCLEOTIDE_BINDING	0.53248	1.7285	0	0	0	0.176	0.0513	0.177	0	0	C5-MF	CCD841
GO_RIBONUCLEOTIDE_BINDING	20	http://www.gsea-msigdb.org/gsea/msigdb/cards/GO_RIBONUCLEOTIDE_BINDING	0.47611	1.5236	0	0.088	0.283	0.15	0.0513	0.152	0	0	C5-MF	CCD841
GO_DRUG_BINDING	20	http://www.gsea-msigdb.org/gsea/msigdb/cards/GO_DRUG_BINDING	0.46688	1.4697	0	0.091573	0.3504	0.15	0.0513	0.152	0	0	C5-MF	CCD841
